# Supplementary material for: Physical scaling for predicting shear viscosity and memory effects of lithium-ion battery cathode slurries
Source: Royal Society of Chemistry journal article supplement (doi:10.1039/d4sm01493f), 2025-01-01
Supplement: d4sm01493f1.xlsx [file d4sm01493f1.xlsx]

## Sheet: Sheet1
	Sample	Shear Rate	Mode	A	alpha0	de0	einf	n	s0	tau0	A_err	alpha0_err	de0_err	einf_err	n_err	s0_err	tau0_err
0	0P_02p5AM	1	Post	9.59605e+07	0.99973	49.4966	14.0753	0.720045	0.0102201	2.67184e-07	9.04499e+06	0.024532	3.85381	3.70342	0.0109026	0.000199251	2.61109e-08
1	0P_02p5AM	10	Post	8.66654e+07	0.995339	53.2893	9.83106	0.703742	0.0106547	2.6828e-07	8.26504e+06	0.0234899	3.97518	3.79431	0.0109352	0.000189093	2.50872e-08
2	0P_02p5AM	100	Post	5.90966e+07	0.998841	45.9818	6.442	0.696319	0.00847667	2.87199e-07	5.66813e+06	0.017266	2.81129	2.69299	0.0106408	0.000155394	2.34377e-08
3	0P_02p5AM	1000	Post	4.51687e+07	0.997345	46.4288	15.7523	0.689422	0.00865539	2.18915e-07	4.41709e+06	0.0293702	4.53785	4.58099	0.0105717	0.0001791	2.65218e-08
4	0P_02p5AM	1250	Post	4.55506e+07	0.999746	53.0085	4.39573	0.690177	0.00840959	2.38441e-07	4.26669e+06	0.0168629	3.4605	3.51156	0.0103224	0.000164917	2.09601e-08
5	0P_02p5AM	1500	Post	4.94072e+07	0.998883	44.1197	2.93434	0.696947	0.0076284	2.88112e-07	4.547e+06	0.0137005	2.31382	2.31928	0.0102894	0.00013971	2.13779e-08
6	0P_02p5AM	1750	Post	4.69605e+07	0.999634	38.6297	-0.0497511	0.693366	0.006779	3.28473e-07	4.31398e+06	0.0108997	1.60412	1.52071	0.0105025	0.000115091	2.08766e-08
7	0P_02p5AM	2000	Post	4.67651e+07	0.998965	39.0253	3.02173	0.692747	0.00705059	3.11233e-07	4.39612e+06	0.013637	1.99572	1.87819	0.0104652	0.000123367	2.25123e-08
8	0P_02p5AM	2250	Post	4.781e+07	0.999267	41.3919	-0.135929	0.693682	0.00708374	3.15337e-07	4.43378e+06	0.0108709	1.79616	1.72672	0.0105517	0.000120215	2.04358e-08
9	0P_02p5AM	25	Post	7.45138e+07	0.997888	51.1395	12.7054	0.70311	0.0101449	2.56574e-07	7.10229e+06	0.0261231	4.15541	3.9965	0.0107567	0.000191381	2.61746e-08
10	0P_02p5AM	250	Post	4.82607e+07	0.998297	42.0565	22.3854	0.687307	0.00871891	2.42337e-07	4.88337e+06	0.0356067	4.35801	4.2518	0.01093	0.000181435	3.1237e-08
11	0P_02p5AM	2500	Post	4.67066e+07	0.99814	38.1065	2.13486	0.690992	0.00692817	3.19714e-07	4.50954e+06	0.0127126	1.78066	1.65212	0.0105749	0.000121023	2.23507e-08
12	0P_02p5AM	50	Post	6.50114e+07	0.999434	49.0862	13.0878	0.697974	0.00959553	2.64447e-07	6.26522e+06	0.0235501	3.86263	3.80141	0.0105931	0.000183044	2.49819e-08
13	0P_02p5AM	500	Post	4.80027e+07	0.992747	29.2511	40.2497	0.694897	0.00899173	2.34239e-07	4.63139e+06	0.0778717	6.10388	5.59929	0.0110289	0.000200813	5.34086e-08
14	0P_02p5AM	75	Post	6.35919e+07	0.999601	46.7285	7.95825	0.702336	0.00887404	2.64996e-07	5.8371e+06	0.0208104	3.26374	3.1427	0.0104678	0.000163294	2.4747e-08
15	0P_02p5AM	750	Post	4.72311e+07	0.999154	35.2699	32.28	0.693827	0.00889697	2.09315e-07	4.39396e+06	0.0571282	6.25392	6.02289	0.010307	0.000186529	3.99187e-08
16	0P_02p5AM	1	Under	8.53848e+07	0.999888	51.3103	12.0651	0.713801	0.0100984	2.5483e-07	8.01382e+06	0.024088	4.01227	3.91425	0.0110113	0.000193105	2.51007e-08
17	0P_02p5AM	10	Under	8.05327e+07	0.995746	50.5705	14.6108	0.710548	0.0103345	2.59737e-07	7.54351e+06	0.0264067	4.03142	3.8872	0.0110328	0.000203098	2.7245e-08
18	0P_02p5AM	100	Under	5.09773e+07	0.999842	47.3642	8.16548	0.695775	0.00810624	2.69785e-07	5.03569e+06	0.0180532	3.05956	2.98809	0.010662	0.000161053	2.24957e-08
19	0P_02p5AM	1000	Under	4.24623e+07	0.998727	49.0568	10.9854	0.701797	0.00773776	2.0854e-07	3.94099e+06	0.0231589	4.27455	4.37563	0.0103238	0.000174162	2.26702e-08
20	0P_02p5AM	1250	Under	4.24021e+07	0.999835	46.5012	7.88519	0.704428	0.00729769	2.30111e-07	3.99596e+06	0.0189844	3.31762	3.41774	0.0103091	0.00016441	2.12627e-08
21	0P_02p5AM	1500	Under	4.47897e+07	0.999583	42.5913	3.25899	0.710624	0.00666391	2.68252e-07	4.03098e+06	0.0133123	2.33825	2.3833	0.0105412	0.000144547	2.04503e-08
22	0P_02p5AM	1750	Under	4.33332e+07	0.999654	40.9051	1.87944	0.709347	0.00634297	2.91446e-07	4.14657e+06	0.0117088	2.0118	1.94294	0.0106633	0.000137822	1.9571e-08
23	0P_02p5AM	2000	Under	4.60111e+07	0.999325	38.6342	3.73939	0.716254	0.00637516	2.818e-07	4.15134e+06	0.0129938	2.06639	2.02617	0.0104948	0.000141653	2.10155e-08
24	0P_02p5AM	2250	Under	4.48361e+07	0.999964	40.7006	0.877413	0.714572	0.00622288	2.82167e-07	4.36303e+06	0.0113516	1.96412	1.96418	0.0108168	0.000142462	2.02508e-08
25	0P_02p5AM	25	Under	6.50835e+07	0.999577	49.1831	13.059	0.703579	0.00938398	2.45726e-07	6.2598e+06	0.0259659	3.94862	3.87781	0.0108308	0.000189558	2.5494e-08
26	0P_02p5AM	250	Under	4.61292e+07	0.995933	34.2772	32.0306	0.696115	0.00827992	2.35756e-07	4.51604e+06	0.0537681	5.01303	4.80022	0.0107536	0.000185635	3.95377e-08
27	0P_02p5AM	2500	Under	4.44109e+07	0.999529	38.5436	1.98681	0.713429	0.00609274	3.05284e-07	4.26896e+06	0.0109905	1.79939	1.78301	0.0106089	0.000137066	2.01802e-08
28	0P_02p5AM	50	Under	5.90623e+07	0.998998	48.2957	13.3459	0.702257	0.00899149	2.47132e-07	5.72356e+06	0.02563	3.99822	3.93216	0.011061	0.000188726	2.57892e-08
29	0P_02p5AM	500	Under	4.36508e+07	0.997779	29.1163	38.6596	0.697919	0.00824198	2.10315e-07	4.18668e+06	0.0830197	7.56181	7.12066	0.0107371	0.00019416	5.30132e-08
30	0P_02p5AM	75	Under	5.39756e+07	0.999459	46.1969	9.69165	0.698505	0.00825471	2.67412e-07	5.2091e+06	0.0207641	3.26226	3.21714	0.0106289	0.000163678	2.396e-08
31	0P_02p5AM	750	Under	4.35553e+07	0.992952	35.7694	26.6855	0.702271	0.00786321	1.96749e-07	4.09689e+06	0.0490322	5.18302	5.10469	0.010733	0.000183007	3.61655e-08
32	0P_05AM	1	Post	5.52463e+07	0.998925	50.7377	98.1351	0.631085	0.0105888	7.09318e-07	7.78829e+06	0.0411817	5.60703	2.41823	0.0156904	0.000176337	9.73027e-08
33	0P_05AM	10	Post	4.71062e+07	0.999831	67.6272	109.518	0.579119	0.0138139	1.00173e-06	6.81219e+06	0.0241846	6.84341	2.30503	0.0155271	0.000185891	1.25235e-07
34	0P_05AM	100	Post	5.00023e+07	0.998824	38.9437	100.708	0.628291	0.0102958	6.60988e-07	7.12434e+06	0.055532	5.81949	2.49369	0.0156525	0.00017707	1.19034e-07
35	0P_05AM	1000	Post	2.79554e+07	0.996021	22.3792	92.0563	0.635696	0.00704542	7.30201e-07	3.98435e+06	0.0747384	4.89883	1.8497	0.0153902	0.00016076	2.03679e-07
36	0P_05AM	1250	Post	3.38996e+07	0.99955	24.7472	91.8328	0.646829	0.00750067	6.02049e-07	4.3788e+06	0.0887479	5.42432	2.36107	0.0150089	0.00016272	1.54149e-07
37	0P_05AM	1500	Post	3.46669e+07	0.997996	23.3311	92.4327	0.652036	0.00751017	5.6828e-07	4.48574e+06	0.111108	6.34036	2.57653	0.0158308	0.000168005	1.68576e-07
38	0P_05AM	1750	Post	2.91688e+07	0.994412	21.7063	92.1042	0.641446	0.00704403	7.28734e-07	3.93435e+06	0.0668719	4.62431	1.77446	0.0150695	0.000156431	1.91968e-07
39	0P_05AM	2000	Post	3.23398e+07	0.996994	24.5909	92.3451	0.643265	0.00743301	5.80658e-07	4.31326e+06	0.091958	5.4763	2.32284	0.0150753	0.000162545	1.51764e-07
40	0P_05AM	2250	Post	3.22332e+07	0.999634	24.0597	92.7207	0.644903	0.00736307	6.69423e-07	4.27715e+06	0.0785435	4.85538	2.08202	0.0151077	0.000158085	1.58589e-07
41	0P_05AM	25	Post	5.25139e+07	0.999455	54.1234	105.415	0.602218	0.0123946	9.08258e-07	7.52625e+06	0.0304597	6.107	2.23927	0.015617	0.00017521	1.33429e-07
42	0P_05AM	250	Post	3.96516e+07	0.999968	29.4787	96.4756	0.638262	0.00847431	6.92843e-07	5.60246e+06	0.0593876	5.12408	2.13397	0.0158486	0.000170113	1.4756e-07
43	0P_05AM	2500	Post	3.22281e+07	0.999478	23.8269	92.2791	0.645091	0.00736066	6.62556e-07	4.35616e+06	0.0763225	5.10058	2.04832	0.0153172	0.000162792	1.75387e-07
44	0P_05AM	50	Post	5.27362e+07	0.999626	45.5017	102.362	0.617894	0.0113725	7.56738e-07	7.64203e+06	0.0420858	5.73225	2.38509	0.015414	0.000177429	1.17927e-07
45	0P_05AM	500	Post	3.58914e+07	0.993423	25.8378	93.8258	0.644804	0.00781432	6.53106e-07	4.66569e+06	0.0658612	4.76856	2.05703	0.0148838	0.000160261	1.4062e-07
46	0P_05AM	75	Post	5.33757e+07	0.998134	40.4289	101.281	0.629252	0.010655	7.87484e-07	7.08502e+06	0.0388479	5.5109	2.14791	0.0151344	0.000172613	1.31018e-07
47	0P_05AM	750	Post	3.32663e+07	0.997104	26.2712	93.0238	0.641117	0.00762261	6.39708e-07	4.63952e+06	0.08722	5.50688	2.40483	0.0155126	0.000166752	1.53709e-07
48	0P_05AM	1	Under	6.56613e+07	0.995842	48.4678	94.7688	0.652735	0.00990396	6.86459e-07	9.4529e+06	0.0387805	5.10239	2.31252	0.015823	0.000181257	9.07066e-08
49	0P_05AM	10	Under	5.14604e+07	0.991004	66.6719	104.815	0.589467	0.0127332	8.38867e-07	7.60294e+06	0.0501401	8.23764	2.85997	0.0169909	0.000177003	1.24361e-07
50	0P_05AM	100	Under	5.15881e+07	0.992341	36.613	96.1333	0.634938	0.00920662	7.75451e-07	7.33014e+06	0.0460423	5.2558	2.01905	0.0162393	0.00015542	1.39128e-07
51	0P_05AM	1000	Under	3.0293e+07	0.995422	20.5455	85.4517	0.647115	0.00618925	6.60906e-07	4.46479e+06	0.110023	5.68409	2.08471	0.0166247	0.000145952	2.06521e-07
52	0P_05AM	1250	Under	2.9521e+07	0.992834	19.1962	84.7651	0.650957	0.00601599	6.12492e-07	4.27599e+06	0.107742	5.18325	2.00387	0.0165763	0.000141885	2.03442e-07
53	0P_05AM	1500	Under	2.85632e+07	0.997029	19.4368	83.7448	0.651308	0.00586832	6.19639e-07	4.16151e+06	0.105621	4.96485	1.94075	0.0163077	0.000140343	1.96716e-07
54	0P_05AM	1750	Under	2.85749e+07	0.997282	18.7263	83.7018	0.65444	0.00578899	6.17573e-07	4.1382e+06	0.138681	6.26274	2.09493	0.0168607	0.00014827	2.61077e-07
55	0P_05AM	2000	Under	2.85858e+07	0.995624	18.1461	83.7432	0.656075	0.00571635	6.20951e-07	3.97903e+06	0.131723	5.93276	2.03937	0.0160767	0.000141876	2.34351e-07
56	0P_05AM	2250	Under	2.85331e+07	0.996251	17.5617	83.2275	0.658728	0.0056573	6.469e-07	4.0374e+06	0.141618	6.09506	2.04739	0.0165739	0.000144362	2.38465e-07
57	0P_05AM	25	Under	5.54814e+07	0.998281	51.3078	102.316	0.609754	0.0113286	8.75172e-07	7.96356e+06	0.0375345	6.17556	2.25945	0.0164658	0.000163509	1.34075e-07
58	0P_05AM	250	Under	4.34766e+07	0.999542	29.8308	90.9159	0.645519	0.00782289	7.44065e-07	6.10821e+06	0.0552899	4.82034	1.92839	0.0164657	0.000150154	1.51165e-07
59	0P_05AM	2500	Under	2.85288e+07	0.996696	18.1924	82.536	0.659199	0.0055881	6.30765e-07	3.95332e+06	0.131804	5.51162	2.11786	0.016204	0.00014244	2.21725e-07
60	0P_05AM	50	Under	5.30075e+07	0.998315	43.9434	98.9897	0.620411	0.0101698	7.99005e-07	8.00367e+06	0.0530027	6.19114	2.27452	0.0163237	0.000161039	1.43675e-07
61	0P_05AM	500	Under	3.72602e+07	0.996482	23.9503	87.8469	0.650296	0.00694947	6.70629e-07	5.52643e+06	0.108969	6.72907	2.23046	0.0184539	0.000160946	2.26553e-07
62	0P_05AM	75	Under	5.43022e+07	0.995248	40.3649	97.5586	0.632904	0.00960334	8.20701e-07	8.01401e+06	0.0587024	6.24068	2.30337	0.0173438	0.000166366	1.54489e-07
63	0P_05AM	750	Under	3.17926e+07	0.99508	22.5085	86.4211	0.644678	0.00641582	6.84763e-07	4.86597e+06	0.0998298	5.6927	2.03018	0.017162	0.000149459	2.09611e-07
64	0P_0AM	10	Post	2.22045e+07	0.977831	1583.38	380.335	0.56341	0.0138658	1.23852e-06	6.06519e+06	0.0649369	215.956	166.613	0.0336188	0.000744778	1.31521e-07
65	0P_0AM	100	Post	1.62295e+07	0.980597	2756.77	335.353	0.502512	0.0223054	1.88752e-06	4.61284e+06	0.0417204	221.906	131.711	0.0289246	0.00116262	1.13543e-07
66	0P_0AM	1000	Post	1.37586e+07	0.952161	3366.06	226.471	0.467366	0.0248602	2.49835e-06	4.30347e+06	0.0421199	277.033	120.107	0.0325628	0.00130683	1.47288e-07
67	0P_0AM	1250	Post	1.37564e+07	0.952139	3365.19	226.436	0.467667	0.0252613	2.49761e-06	3.88823e+06	0.0416582	269.849	120.965	0.0312463	0.00122169	1.44823e-07
68	0P_0AM	1400	Post	1.3774e+07	0.952324	3399.22	179.323	0.46711	0.0250597	2.54997e-06	4.29141e+06	0.0386063	255.233	110.104	0.0315364	0.00124946	1.39814e-07
69	0P_0AM	150	Post	1.76999e+07	0.971239	2848.85	274.428	0.507871	0.0229706	1.97056e-06	4.92426e+06	0.0399359	219.734	121.769	0.0300541	0.001238	1.16701e-07
70	0P_0AM	1500	Post	1.44304e+07	0.963155	3233.17	287.174	0.471978	0.0250319	2.49912e-06	3.95175e+06	0.0410259	257.907	114.229	0.0310662	0.00116795	1.42936e-07
71	0P_0AM	1600	Post	1.44097e+07	0.962961	3241.26	285.332	0.472109	0.0252933	2.51497e-06	4.15959e+06	0.0405956	261.071	111.111	0.0310028	0.00128173	1.48263e-07
72	0P_0AM	1750	Post	1.40325e+07	0.953187	3351.07	200.219	0.469611	0.0250584	2.50106e-06	4.04366e+06	0.0413229	271.931	117.692	0.0315672	0.00125648	1.43224e-07
73	0P_0AM	1850	Post	1.35489e+07	0.949803	3339.87	249.112	0.465609	0.0248625	2.55183e-06	4.06763e+06	0.0423603	273.238	118.28	0.0321355	0.00125399	1.47605e-07
74	0P_0AM	200	Post	1.85697e+07	0.982274	2996.37	363.037	0.513382	0.0260611	2.26683e-06	4.93204e+06	0.0438894	270.995	124.406	0.030714	0.00156588	1.35881e-07
75	0P_0AM	2000	Post	1.33862e+07	0.950818	3307.87	185.365	0.462459	0.0242558	2.44285e-06	4.0625e+06	0.0406332	256.81	115.555	0.0317338	0.00116515	1.38218e-07
76	0P_0AM	2251	Post	1.18649e+07	0.95518	3486.42	128.465	0.452697	0.024639	2.60049e-06	3.96744e+06	0.036035	247.801	106.651	0.0324607	0.00124847	1.42821e-07
77	0P_0AM	25	Post	1.83864e+07	0.972784	2431.38	351.881	0.525837	0.0197783	1.51246e-06	4.94199e+06	0.0474579	226.146	156.135	0.0303766	0.00108614	1.10833e-07
78	0P_0AM	250	Post	1.70661e+07	0.985786	2983.05	197.07	0.498418	0.0234153	2.16197e-06	4.51866e+06	0.0348706	206.89	105.782	0.0294418	0.00115468	1.15567e-07
79	0P_0AM	300	Post	1.7351e+07	0.99912	2938.18	228.358	0.500815	0.0238963	2.18723e-06	4.26024e+06	0.033213	198.772	102.541	0.0285173	0.00111728	1.1398e-07
80	0P_0AM	400	Post	1.55787e+07	0.964613	3111.83	212.754	0.485821	0.0241315	2.25552e-06	4.37265e+06	0.0414464	249.25	122.151	0.0310059	0.00121237	1.29677e-07
81	0P_0AM	50	Post	1.92446e+07	0.965915	2770.83	276.395	0.528094	0.0229444	1.73786e-06	4.60605e+06	0.043511	232.008	145.545	0.0272791	0.00128157	1.09855e-07
82	0P_0AM	500	Post	1.29438e+07	0.956444	3206.24	218.637	0.463702	0.0235666	2.35158e-06	4.16334e+06	0.0411786	250.242	121.482	0.0309989	0.00117292	1.34026e-07
83	0P_0AM	600	Post	1.29421e+07	0.95667	3198.19	218.791	0.46336	0.0234776	2.35126e-06	4.0107e+06	0.0431977	263.147	122.576	0.0321186	0.00116893	1.38694e-07
84	0P_0AM	75	Post	1.80052e+07	0.96899	2684.16	339.137	0.514562	0.0220588	1.78459e-06	4.62999e+06	0.0450949	228.185	137.985	0.0291704	0.00114863	1.13057e-07
85	0P_0AM	750	Post	1.26012e+07	0.942402	3377.88	176.744	0.458258	0.0241405	2.46199e-06	3.9809e+06	0.03994	254.485	114.969	0.0313709	0.00119277	1.40266e-07
86	0P_0AM	900	Post	1.41287e+07	0.9652	3177.6	296.814	0.472101	0.0246831	2.43513e-06	4.10572e+06	0.0415516	261.881	116.665	0.0320741	0.00125674	1.4277e-07
87	0P_0AM	10	Under	8.6156e+06	0.996671	1238.06	455.159	0.454256	0.0106152	1.15021e-06	2.30769e+06	0.0426622	122.73	113.276	0.0292782	0.000256778	1.18431e-07
88	0P_0AM	100	Under	1.20572e+07	0.957954	2094.29	207.639	0.463356	0.0142221	1.50826e-06	3.89142e+06	0.0420732	163.512	123.931	0.0325674	0.000461178	1.03805e-07
89	0P_0AM	1000	Under	9.91078e+06	0.933929	2179.16	190.736	0.424047	0.0153754	2.55682e-06	3.74478e+06	0.0419271	157.337	75.9108	0.0365021	0.000491796	1.38815e-07
90	0P_0AM	1250	Under	1.08178e+07	0.960861	2048.62	209.875	0.433514	0.0155592	2.68846e-06	3.45802e+06	0.0365738	135.248	64.4142	0.0345558	0.000457413	1.3651e-07
91	0P_0AM	1400	Under	9.69785e+06	0.952051	2063.82	200.631	0.419912	0.0153768	2.84111e-06	3.64402e+06	0.0381644	140.867	63.9596	0.0364368	0.000481171	1.45384e-07
92	0P_0AM	150	Under	1.0808e+07	0.956158	2107.99	232.022	0.447728	0.014321	1.62496e-06	3.82716e+06	0.0446706	167.298	117.676	0.0327522	0.000464438	1.0362e-07
93	0P_0AM	1500	Under	9.7285e+06	0.951748	2016.56	219.621	0.420444	0.0152062	2.97255e-06	3.48294e+06	0.0399724	143.683	62.5229	0.0350576	0.000461164	1.5574e-07
94	0P_0AM	1600	Under	9.72905e+06	0.951795	1982.61	217.775	0.42044	0.015066	3.01026e-06	3.59249e+06	0.0389201	142.542	58.4821	0.0366537	0.000460697	1.65239e-07
95	0P_0AM	1750	Under	9.79391e+06	0.936326	1978.47	194.278	0.420729	0.0149967	3.10105e-06	3.47587e+06	0.0407403	147.486	59.4796	0.0374082	0.00045999	1.74381e-07
96	0P_0AM	1850	Under	9.80582e+06	0.931097	1960.66	186.747	0.421369	0.0149434	3.12451e-06	3.78263e+06	0.0433406	156.362	61.3133	0.039593	0.000483818	1.9003e-07
97	0P_0AM	200	Under	1.15336e+07	0.956776	2117.82	238.194	0.453418	0.0146589	1.70698e-06	4.17176e+06	0.0444544	166.158	112.75	0.035507	0.000492003	1.07449e-07
98	0P_0AM	2000	Under	8.72588e+06	0.935051	1945.62	197.678	0.408992	0.0147599	3.31353e-06	3.69371e+06	0.043011	151.945	59.1252	0.0397053	0.000477151	1.96775e-07
99	0P_0AM	2251	Under	1.15936e+07	0.942192	1837.9	198.247	0.4383	0.0150196	3.29001e-06	3.93057e+06	0.0427924	149.253	55.6018	0.0406176	0.000488915	2.10403e-07
100	0P_0AM	25	Under	1.34195e+07	0.986537	1999.47	167.243	0.48506	0.0136812	1.21258e-06	3.54219e+06	0.0300345	128.042	116.514	0.0298772	0.000412032	8.55754e-08
101	0P_0AM	250	Under	1.22455e+07	0.973226	2066.76	265.61	0.458636	0.0149761	1.786e-06	3.83277e+06	0.0417501	153.666	103.886	0.0334007	0.00046396	1.04913e-07
102	0P_0AM	300	Under	1.23634e+07	0.966578	2115.12	242.021	0.457559	0.01504	1.86975e-06	3.84733e+06	0.0426602	163.167	106.965	0.0342633	0.000478981	1.04655e-07
103	0P_0AM	400	Under	1.23152e+07	0.964506	2133.68	222.356	0.454836	0.0152298	1.97074e-06	3.82739e+06	0.0408041	152.6	96.3028	0.0342925	0.000471441	1.0488e-07
104	0P_0AM	50	Under	1.27915e+07	0.964627	1990.21	248.932	0.473919	0.0138587	1.33021e-06	3.78899e+06	0.0458403	173.886	138.859	0.0313541	0.000439538	1.09144e-07
105	0P_0AM	500	Under	1.26088e+07	0.966722	2132.52	204.887	0.456827	0.015475	2.06873e-06	3.74165e+06	0.0386954	146.769	88.633	0.0343465	0.000474826	1.08327e-07
106	0P_0AM	600	Under	1.06902e+07	0.946485	2189.06	207.619	0.436667	0.0152978	2.23288e-06	3.63237e+06	0.040717	154.081	87.9803	0.034545	0.000472376	1.14898e-07
107	0P_0AM	75	Under	1.42017e+07	0.984339	2001.79	241.067	0.483834	0.0142918	1.44705e-06	3.92305e+06	0.0407775	155.319	119.524	0.0327804	0.000462923	1.00668e-07
108	0P_0AM	750	Under	1.06902e+07	0.94595	2190.31	188.723	0.434644	0.0153411	2.34083e-06	3.6734e+06	0.0390413	147.83	78.6337	0.0364125	0.000487215	1.2209e-07
109	0P_0AM	900	Under	9.30007e+06	0.949839	2176.1	182.447	0.41876	0.0153027	2.45761e-06	3.83192e+06	0.0384244	146.5	77.2682	0.0363891	0.000488563	1.23426e-07
110	0P_0p1AM	1	Post	1.52402e+07	0.900516	307.07	255.42	0.453381	0.0202338	9.90531e-07	2.88035e+06	0.170884	161.988	118.18	0.022418	0.000378243	4.51203e-07
111	0P_0p1AM	10	Post	1.45467e+07	0.936981	426.829	326.968	0.427565	0.027147	1.01819e-06	2.53567e+06	0.170047	215.649	151.036	0.0208335	0.000478901	3.74182e-07
112	0P_0p1AM	100	Post	1.30292e+07	0.906926	474.904	278.93	0.401077	0.0299454	1.39448e-06	2.40382e+06	0.161753	234.892	128.96	0.0227738	0.000542009	5.32904e-07
113	0P_0p1AM	1000	Post	1.12179e+07	0.903654	376.609	243.293	0.380819	0.0275492	1.67431e-06	2.2249e+06	0.145666	204.368	98.0617	0.0237442	0.000453665	1.10494e-06
114	0P_0p1AM	1250	Post	1.01224e+07	0.826999	463.207	184.063	0.369006	0.0278572	1.62257e-06	2.21789e+06	0.153395	221.89	100.262	0.0247285	0.000492452	9.22022e-07
115	0P_0p1AM	1500	Post	9.95579e+06	0.828952	456.444	216.489	0.366333	0.0283031	1.77324e-06	2.16715e+06	0.152797	224.001	96.9424	0.0245662	0.000501721	1.23232e-06
116	0P_0p1AM	1750	Post	9.93723e+06	0.824388	491.589	214.743	0.366204	0.0287324	1.62288e-06	2.07931e+06	0.151389	226.527	109.093	0.0241427	0.000491046	9.84551e-07
117	0P_0p1AM	2000	Post	9.43251e+06	0.871995	465.775	248.322	0.360361	0.0292142	1.7107e-06	1.88052e+06	0.149977	235.368	101.333	0.0228972	0.000481584	1.11028e-06
118	0P_0p1AM	2250	Post	9.4332e+06	0.871856	499.372	250.923	0.359828	0.0300898	1.66135e-06	2.07542e+06	0.159564	261.321	114.07	0.0254008	0.000547469	9.55287e-07
119	0P_0p1AM	25	Post	1.31788e+07	0.923209	507.333	320.959	0.410082	0.0308441	1.17747e-06	2.34083e+06	0.173754	244.319	154.182	0.0202203	0.000558222	3.86738e-07
120	0P_0p1AM	250	Post	1.21156e+07	0.829657	473.551	213.108	0.390955	0.0283514	1.41873e-06	2.38065e+06	0.164734	224.567	115.247	0.0234092	0.000487554	7.2143e-07
121	0P_0p1AM	2500	Post	9.42995e+06	0.881651	534.244	248.869	0.359508	0.030771	1.65469e-06	2.02285e+06	0.16608	261.928	126.879	0.0238661	0.000533708	5.70829e-07
122	0P_0p1AM	50	Post	1.31225e+07	0.929908	454.43	318.592	0.405699	0.0300179	1.34225e-06	2.34778e+06	0.16839	240.196	139.34	0.0209508	0.000532017	4.76331e-07
123	0P_0p1AM	500	Post	1.21173e+07	0.829208	423.109	213.475	0.389856	0.0272651	1.55043e-06	2.43224e+06	0.153275	200.616	98.0688	0.0242276	0.000472854	9.89951e-07
124	0P_0p1AM	75	Post	1.31202e+07	0.932037	454.855	300.51	0.403772	0.0301551	1.31701e-06	2.50998e+06	0.167754	248.602	138.128	0.0230562	0.000569246	5.56204e-07
125	0P_0p1AM	750	Post	1.21328e+07	0.893126	354.989	249.813	0.388889	0.0271302	1.71458e-06	2.2348e+06	0.143813	202.155	89.7271	0.0241212	0.000469203	1.52434e-06
126	0P_0p1AM	1	Under	9.63607e+06	0.734847	354.866	248.51	0.394853	0.0191791	1.23305e-06	2.3914e+06	0.133626	154.595	86.4017	0.0274818	0.000370167	1.81254e-06
127	0P_0p1AM	10	Under	1.43199e+07	0.998793	349.489	357.7	0.42559	0.0262059	1.11559e-06	2.43673e+06	0.175003	194.742	141.958	0.0210997	0.00043088	3.60371e-07
128	0P_0p1AM	100	Under	1.19141e+07	0.764436	548.254	176.995	0.391518	0.0261671	1.22757e-06	2.54238e+06	0.152647	207.781	112.276	0.0246264	0.000470885	6.97384e-07
129	0P_0p1AM	1000	Under	1.34989e+07	0.751072	303.681	175.617	0.404399	0.0207668	1.6112e-06	2.83976e+06	0.118008	143.31	61.7046	0.0282795	0.000345131	2.81649e-06
130	0P_0p1AM	1250	Under	1.3498e+07	0.751069	293.777	175.118	0.404415	0.0201749	1.70208e-06	3.42473e+06	0.121451	162.179	56.469	0.0338841	0.000392099	4.4755e-06
131	0P_0p1AM	1500	Under	1.34438e+07	0.750511	284.086	175.577	0.405454	0.0196574	1.6973e-06	3.22552e+06	0.114662	139.272	56.6707	0.030198	0.000354679	3.94156e-06
132	0P_0p1AM	1750	Under	1.34382e+07	0.750602	274.828	175.571	0.405949	0.0193078	1.69569e-06	3.46806e+06	0.112057	142.635	58.0781	0.0316525	0.000350631	3.46567e-06
133	0P_0p1AM	2000	Under	1.34091e+07	0.761585	268.464	182.578	0.406638	0.018977	1.83698e-06	3.49189e+06	0.109139	134.37	54.7292	0.0305116	0.000339017	3.75646e-06
134	0P_0p1AM	2250	Under	1.41061e+07	0.770047	261.552	181.201	0.412365	0.0188138	1.75998e-06	3.3611e+06	0.121416	123.284	56.9851	0.0284573	0.000319338	2.40643e-06
135	0P_0p1AM	25	Under	1.32612e+07	0.960861	402.714	336.741	0.410593	0.0277119	1.27412e-06	2.45382e+06	0.168238	230.183	140.14	0.0230255	0.000497293	4.80034e-07
136	0P_0p1AM	250	Under	1.17722e+07	0.758778	457.349	167.682	0.387925	0.0243927	1.34884e-06	2.62244e+06	0.157996	187.214	97.2975	0.0252132	0.000412113	7.72189e-07
137	0P_0p1AM	2500	Under	1.41743e+07	0.770152	261.335	184.066	0.413466	0.0187267	1.79968e-06	3.5838e+06	0.112784	148.287	51.3736	0.0327034	0.000358033	4.70816e-06
138	0P_0p1AM	50	Under	1.25218e+07	0.845269	489.484	241.97	0.400398	0.0269348	1.21114e-06	2.56944e+06	0.166351	213.236	124.819	0.0235394	0.00047366	5.0856e-07
139	0P_0p1AM	500	Under	1.15139e+07	0.712026	414.624	155.116	0.385781	0.0225689	1.56505e-06	2.5921e+06	0.132447	160.217	72.9606	0.0264003	0.000375222	1.74111e-06
140	0P_0p1AM	75	Under	1.15732e+07	0.860671	475.489	238.365	0.391449	0.0263804	1.33494e-06	2.40605e+06	0.160286	210.43	117.627	0.0228707	0.000446991	5.40717e-07
141	0P_0p1AM	750	Under	1.24761e+07	0.781856	309.824	194.541	0.394523	0.0214927	1.76063e-06	2.6108e+06	0.124387	142.233	65.5748	0.0264815	0.000354324	2.12961e-06
142	0P_10AM	1	Post	5.10415e+07	0.888837	78.2334	13.0614	0.719394	0.00518258	1.19162e-07	5.99824e+06	0.105095	38.0542	36.3089	0.0150804	0.000143138	4.78578e-08
143	0P_10AM	10	Post	7.29165e+07	0.858354	111.442	-7.97374	0.72464	0.00623158	1.06569e-07	9.21917e+06	0.0921978	34.554	32.4917	0.0164172	0.00017124	4.13632e-08
144	0P_10AM	100	Post	4.17557e+07	0.949027	100.477	-9.36107	0.715667	0.00474232	8.3645e-08	4.83842e+06	0.0640887	35.4096	35.3318	0.0142728	0.000126353	3.02381e-08
145	0P_10AM	1000	Post	2.55405e+07	0.990806	81.0773	-3.79232	0.705815	0.00351309	6.02769e-08	2.90773e+06	0.0455387	39.1111	39.3748	0.0134177	9.36241e-05	2.34449e-08
146	0P_10AM	1250	Post	2.67783e+07	0.99321	112.297	-35.1087	0.711578	0.00353978	4.44201e-08	2.73321e+06	0.031941	37.8145	38.0669	0.0124975	8.55232e-05	1.60595e-08
147	0P_10AM	1500	Post	2.69392e+07	0.996262	98.2976	-21.5984	0.712769	0.00350673	5.10862e-08	2.84433e+06	0.0342638	37.9422	38.2193	0.0132306	8.92893e-05	1.71349e-08
148	0P_10AM	1750	Post	2.43613e+07	0.999895	73.0575	2.81502	0.705103	0.00337699	6.36942e-08	2.68759e+06	0.0381829	39.1782	39.6233	0.0129681	8.81343e-05	2.03857e-08
149	0P_10AM	2000	Post	2.49096e+07	0.998967	108.692	-32.3919	0.705875	0.00345074	4.56911e-08	2.71686e+06	0.0316065	37.5884	37.7558	0.0128472	8.78179e-05	1.66552e-08
150	0P_10AM	2250	Post	2.48502e+07	0.998886	102.344	-26.1398	0.705677	0.00343269	4.92085e-08	2.72957e+06	0.0289786	36.6537	36.964	0.0131515	8.80467e-05	1.48332e-08
151	0P_10AM	25	Post	5.76717e+07	0.875521	118.553	-19.6925	0.718318	0.0055518	8.55606e-08	7.29474e+06	0.0782039	34.0031	32.9115	0.015098	0.000154401	3.51751e-08
152	0P_10AM	250	Post	3.02078e+07	0.992713	84.18	1.08757	0.704124	0.00405298	8.30668e-08	3.41135e+06	0.0478064	36.1499	36.3481	0.0132128	0.000104125	2.54928e-08
153	0P_10AM	2500	Post	2.42577e+07	0.99224	125.863	-50.3249	0.706159	0.00339782	3.76473e-08	2.57085e+06	0.0301883	39.2476	39.5131	0.0128263	8.31339e-05	1.69491e-08
154	0P_10AM	50	Post	5.30076e+07	0.955995	87.4294	5.53963	0.728572	0.00516168	1.06557e-07	5.82266e+06	0.0773177	34.8665	34.3542	0.0144198	0.000142292	3.55906e-08
155	0P_10AM	500	Post	2.89548e+07	0.99346	106.536	-25.8768	0.709238	0.00382118	5.59361e-08	3.1876e+06	0.0371195	35.8556	36.261	0.0136053	9.85648e-05	1.8514e-08
156	0P_10AM	75	Post	4.37974e+07	0.929572	101.222	-8.81228	0.714092	0.00484118	8.3862e-08	5.2908e+06	0.0674015	32.6006	32.2743	0.0143607	0.000132531	2.99334e-08
157	0P_10AM	750	Post	2.68357e+07	0.991291	108.866	-29.9351	0.706585	0.00363327	4.99601e-08	2.91616e+06	0.0349343	38.0213	38.2873	0.0132419	9.15877e-05	1.79451e-08
158	0P_10AM	1	Under	5.8012e+07	0.832819	100.611	-14.8778	0.76019	0.00457488	6.78515e-08	6.36482e+06	0.0908417	39.5702	38.8724	0.0148826	0.00018834	3.83121e-08
159	0P_10AM	10	Under	8.27095e+07	0.818719	137.66	-37.3781	0.747426	0.00567956	6.94493e-08	1.002e+07	0.0851302	35.8344	34.2961	0.0158661	0.000183886	3.70002e-08
160	0P_10AM	100	Under	4.8177e+07	0.984373	76.3203	8.4472	0.735343	0.00426389	9.48754e-08	5.47519e+06	0.0675033	37.1934	36.7686	0.015061	0.000122791	2.96647e-08
161	0P_10AM	1000	Under	2.85189e+07	0.994905	77.2232	-4.80825	0.718786	0.00315878	5.66614e-08	3.20566e+06	0.0416891	39.0593	39.5009	0.0138845	8.29409e-05	2.06051e-08
162	0P_10AM	1250	Under	2.78469e+07	0.998292	77.912	-6.12485	0.71875	0.00312398	5.4411e-08	3.18466e+06	0.0402343	38.5269	38.7816	0.0140781	8.30696e-05	2.00789e-08
163	0P_10AM	1500	Under	2.78274e+07	0.999899	77.8001	-6.34406	0.71941	0.00309426	5.3424e-08	2.9485e+06	0.0385843	41.982	42.2289	0.0131981	7.92992e-05	2.01747e-08
164	0P_10AM	1750	Under	2.78342e+07	0.999956	81.5554	-10.5132	0.72113	0.00307653	5.0077e-08	2.89297e+06	0.038865	36.8981	37.0457	0.0129931	7.9256e-05	1.77175e-08
165	0P_10AM	2000	Under	2.78364e+07	0.999652	81.6835	-10.9202	0.722419	0.00307735	4.92648e-08	3.02119e+06	0.0354844	40.7075	40.8076	0.0139038	8.2566e-05	1.74719e-08
166	0P_10AM	2250	Under	2.66823e+07	0.99788	110.647	-40.1576	0.718776	0.00303919	3.71763e-08	2.77063e+06	0.0327748	39.7877	40.0027	0.0129095	7.59509e-05	1.71707e-08
167	0P_10AM	25	Under	6.64229e+07	0.852481	113.255	-19.3322	0.740041	0.00507608	7.11373e-08	8.17265e+06	0.0918677	38.7949	37.3598	0.016218	0.000156981	3.98541e-08
168	0P_10AM	250	Under	3.91174e+07	0.999298	77.689	0.744523	0.732622	0.00371123	7.38534e-08	4.19772e+06	0.0518067	36.9075	36.8559	0.0141727	0.000102335	2.37261e-08
169	0P_10AM	2500	Under	2.66933e+07	0.996253	111.07	-40.5484	0.718849	0.00304616	3.78142e-08	2.91312e+06	0.0314537	38.8769	39.1771	0.0134014	7.97088e-05	1.55019e-08
170	0P_10AM	50	Under	5.56479e+07	0.916346	101.258	-12.2435	0.736255	0.00462599	7.40938e-08	6.75128e+06	0.0724688	33.2985	32.7323	0.0155459	0.000140547	3.02507e-08
171	0P_10AM	500	Under	3.28606e+07	0.993066	69.7016	4.40928	0.725512	0.00334614	6.82228e-08	3.66618e+06	0.052524	39.3039	39.6439	0.01443	9.13347e-05	2.64048e-08
172	0P_10AM	75	Under	5.05236e+07	0.949243	81.0974	5.12231	0.734315	0.00437709	9.01679e-08	5.83683e+06	0.0760205	35.7682	35.233	0.0148188	0.000125116	3.31779e-08
173	0P_10AM	750	Under	3.01007e+07	0.998647	61.6311	11.4556	0.722423	0.00323421	7.4029e-08	3.40637e+06	0.0462579	40.7219	40.8312	0.0141263	8.74672e-05	2.41825e-08
174	0P_20AM	1	Post	4.88643e+07	0.884734	165.144	52.2706	0.76537	0.00186343	5.43477e-05	2.74841e+07	0.0379732	111.421	0.654043	0.127983	0.000357427	1.71958e-05
175	0P_20AM	10	Post	1.04001e+07	0.782533	529.249	55.3352	0.483501	0.00181852	9.99187e-05	2.56173e+07	0.0249652	107.203	0.847756	0.136487	0.000189197	7.87026e-06
176	0P_20AM	100	Post	8.1324e+06	0.811664	501.985	55.502	0.475448	0.00163987	9.27635e-05	2.55122e+07	0.0240215	112.081	0.768595	0.100035	0.000364922	1.16565e-05
177	0P_20AM	1000	Post	4.92918e+07	0.927228	106.053	52.9739	0.781847	0.00200345	4.12815e-05	1.29418e+07	0.047288	63.7166	0.661046	0.045954	0.000285621	1.56207e-05
178	0P_20AM	1250	Post	4.95287e+07	0.950294	101.655	52.6353	0.78401	0.0019838	3.96144e-05	1.21485e+07	0.0437874	57.1248	0.661286	0.0429738	0.000228674	1.41555e-05
179	0P_20AM	1500	Post	4.92971e+07	0.933431	100.267	52.5021	0.787057	0.00201292	4.05057e-05	1.33508e+07	0.0452744	70.1905	0.650186	0.048909	0.000274803	1.66502e-05
180	0P_20AM	1750	Post	4.60223e+07	0.955413	99.2441	52.6673	0.774795	0.00194128	3.76369e-05	1.31989e+07	0.0418732	52.7414	0.646727	0.0505039	0.000218342	1.25772e-05
181	0P_20AM	2000	Post	4.65736e+07	0.936926	110.035	52.9063	0.774437	0.00194125	4.13088e-05	1.42787e+07	0.0439472	62.5343	0.663505	0.0551182	0.000254071	1.4005e-05
182	0P_20AM	2250	Post	4.09782e+07	0.939558	113.217	52.2327	0.754528	0.00183145	3.88481e-05	1.23731e+07	0.0420051	57.9042	0.648139	0.0490308	0.000199611	1.20891e-05
183	0P_20AM	25	Post	1.07368e+07	0.773501	505.106	56.6114	0.497364	0.00190273	9.76338e-05	2.02372e+07	0.0279099	120.135	0.88678	0.129824	0.000173031	7.70207e-06
184	0P_20AM	250	Post	4.53652e+07	0.797831	303.09	54.6696	0.73547	0.00188531	9.22779e-05	1.17788e+07	0.0652948	75.1965	0.718039	0.0380718	0.000914779	1.73535e-05
185	0P_20AM	2500	Post	4.62916e+07	0.952272	108.636	52.4939	0.774124	0.00191649	3.89482e-05	1.31345e+07	0.0405136	56.3498	0.646881	0.0524652	0.000211347	1.15339e-05
186	0P_20AM	50	Post	3.95494e+06	0.797877	569.034	55.0028	0.3821	0.00167442	9.93355e-05	1.80642e+07	0.0211182	116.981	0.780839	0.175197	0.000143947	8.88965e-06
187	0P_20AM	500	Post	6.12445e+07	0.956585	72.8507	53.7286	0.829803	0.00257709	4.24381e-05	1.39978e+07	0.0572034	86.1076	0.70116	0.0506991	0.000486805	2.09277e-05
188	0P_20AM	75	Post	3.92679e+06	0.79358	548.927	55.4879	0.389625	0.00167084	9.99087e-05	2.04623e+07	0.0238175	114.103	0.802842	0.139911	0.000180888	8.3386e-06
189	0P_20AM	750	Post	5.09179e+07	0.878936	131.762	54.0458	0.783461	0.0020903	5.35071e-05	1.42873e+07	0.0525721	94.6133	0.68619	0.0504831	0.000447536	2.04516e-05
190	0P_20AM	1	Under	5.14952e+07	0.909892	126.071	50.9623	0.779886	0.00187352	4.48114e-05	2.76704e+07	0.0333805	95.5051	0.651361	0.164679	0.000286108	1.49579e-05
191	0P_20AM	10	Under	3.11188e+06	0.790906	513.888	53.4009	0.331114	0.00163716	9.94568e-05	2.84847e+07	0.0227202	92.0064	0.788307	0.153127	0.000143296	7.97459e-06
192	0P_20AM	100	Under	7.77138e+06	0.793688	372.716	52.942	0.47201	0.00161523	8.99919e-05	2.26317e+07	0.0308247	96.0877	0.734987	0.0843564	0.000320968	1.58444e-05
193	0P_20AM	1000	Under	5.67308e+07	0.968087	57.0641	50.519	0.801705	0.00203817	3.6668e-05	1.51249e+07	0.0532751	60.9363	0.635509	0.0525268	0.000281003	2.09007e-05
194	0P_20AM	1250	Under	3.93127e+07	0.884001	102.145	50.2524	0.734594	0.00173792	4.44734e-05	1.44672e+07	0.0478054	54.647	0.615609	0.0500163	0.000227728	1.97037e-05
195	0P_20AM	1500	Under	3.83994e+07	0.905483	91.5338	50.1063	0.734597	0.00174358	3.97217e-05	1.34968e+07	0.0510012	59.5202	0.622464	0.0483609	0.000227181	1.97199e-05
196	0P_20AM	1750	Under	3.83994e+07	0.905506	92.3399	50.0775	0.734618	0.0017375	3.96905e-05	1.55004e+07	0.0491755	57.5359	0.600602	0.0559605	0.000233157	1.88476e-05
197	0P_20AM	2000	Under	3.83977e+07	0.905427	92.5946	49.9909	0.734808	0.00173488	3.96859e-05	1.33116e+07	0.0475136	57.8337	0.599153	0.0468427	0.000204448	2.06764e-05
198	0P_20AM	2250	Under	3.83972e+07	0.905438	93.2059	49.9891	0.734811	0.00173168	3.96864e-05	1.42028e+07	0.0476182	54.953	0.630832	0.0479734	0.000210657	2.01724e-05
199	0P_20AM	25	Under	5.09689e+06	0.785696	474.171	53.8362	0.396491	0.00168236	9.86999e-05	2.68943e+07	0.0279461	117.407	0.794356	0.167331	0.000183129	1.13826e-05
200	0P_20AM	250	Under	3.76105e+07	0.790585	161.38	52.4011	0.707333	0.00182485	6.42622e-05	1.16876e+07	0.0775318	63.0898	0.697569	0.0380542	0.000549078	2.14953e-05
201	0P_20AM	2500	Under	3.84024e+07	0.905421	91.9972	50.0574	0.734935	0.00173322	4.01668e-05	2.18419e+07	0.0508354	73.4894	0.637902	0.0953598	0.000282889	2.15859e-05
202	0P_20AM	50	Under	4.94843e+06	0.787	438.18	53.5453	0.406099	0.00163998	9.75744e-05	2.02362e+07	0.0236619	102.422	0.743792	0.17518	0.000134573	1.13217e-05
203	0P_20AM	500	Under	6.49122e+07	0.971795	43.1353	51.1326	0.825835	0.00230223	3.59865e-05	1.3629e+07	0.0593808	63.6614	0.633111	0.0447595	0.000372457	2.24343e-05
204	0P_20AM	75	Under	4.31718e+06	0.796343	443.994	52.8608	0.390362	0.00159133	9.79201e-05	2.49767e+07	0.0224209	97.5999	0.758069	0.162082	0.000170918	1.17468e-05
205	0P_20AM	750	Under	5.76567e+07	0.945621	55.6548	50.7389	0.805114	0.00209289	3.77933e-05	1.41998e+07	0.0559631	56.4455	0.645579	0.0478348	0.000311565	2.19233e-05
206	1HP_0AM	100	Post	1.03269e+07	0.999761	2284.82	-96.4584	0.403472	0.0284266	1.33719e-06	2.05064e+06	0.00804205	50.6057	20.0575	0.0204155	0.000518317	4.43033e-08
207	1HP_0AM	1000	Post	7.92613e+06	0.996875	2269.38	-99.257	0.365299	0.0312239	1.77082e-06	1.66844e+06	0.00984516	59.1384	19.475	0.0203915	0.000532642	6.23389e-08
208	1HP_0AM	1250	Post	7.80538e+06	0.998397	2315.71	-99.8529	0.365852	0.0314457	1.82074e-06	1.796e+06	0.00802525	59.488	16.624	0.0206916	0.000566021	5.99951e-08
209	1HP_0AM	1400	Post	7.80255e+06	0.999922	2346.5	-99.8649	0.364995	0.0316668	1.86513e-06	1.72323e+06	0.00710473	57.2164	14.4854	0.020282	0.000558058	5.75665e-08
210	1HP_0AM	1500	Post	7.80265e+06	0.999958	2338.51	-99.9226	0.363795	0.031801	1.86374e-06	1.6431e+06	0.00617243	55.8537	12.994	0.020048	0.000551971	5.55053e-08
211	1HP_0AM	1600	Post	7.74064e+06	0.999841	2372.69	-99.8191	0.364589	0.0317741	1.8278e-06	1.7514e+06	0.00819876	58.3178	17.1308	0.0203574	0.000574632	5.97355e-08
212	1HP_0AM	1750	Post	7.73026e+06	0.999734	2388.42	-99.9725	0.364044	0.0321421	1.88578e-06	1.67018e+06	0.00612608	56.9162	12.5689	0.0204055	0.000557711	5.41256e-08
213	1HP_0AM	1850	Post	7.73082e+06	0.999869	2395.24	-99.755	0.363805	0.0322624	1.91203e-06	1.6587e+06	0.00562236	58.0577	11.6565	0.0204308	0.000574059	5.48666e-08
214	1HP_0AM	200	Post	9.61362e+06	0.999435	2271.35	-97.4691	0.390534	0.0290476	1.52925e-06	1.89716e+06	0.00750724	50.0358	17.5416	0.0200839	0.000505995	4.79733e-08
215	1HP_0AM	2000	Post	7.73097e+06	0.99983	2388.27	-99.839	0.363611	0.0326879	1.8928e-06	1.58147e+06	0.00600288	58.2368	12.7123	0.0196913	0.000560584	5.6166e-08
216	1HP_0AM	2250	Post	8.61417e+06	0.999907	2402.61	-99.2932	0.375234	0.0327963	1.85059e-06	1.68132e+06	0.00729292	59.1452	15.32	0.0204707	0.000583951	5.76101e-08
217	1HP_0AM	25	Post	1.04595e+07	0.999853	2296.09	-98.969	0.412682	0.0259452	1.0978e-06	2.07478e+06	0.00682855	44.8654	19.7673	0.01973	0.000471986	3.73403e-08
218	1HP_0AM	250	Post	9.60873e+06	0.996604	2252.02	-97.8646	0.391373	0.029456	1.51257e-06	1.99099e+06	0.0105277	56.8246	23.3368	0.0206897	0.000535389	5.38869e-08
219	1HP_0AM	2501	Post	8.62458e+06	0.99961	2401.41	-99.5748	0.376905	0.0326882	1.80685e-06	1.72445e+06	0.00882783	64.3219	18.7341	0.0204813	0.000591886	6.35447e-08
220	1HP_0AM	400	Post	8.63079e+06	0.999684	2241.39	-99.2983	0.378161	0.0296497	1.66037e-06	1.89939e+06	0.00880567	55.1244	18.3847	0.0208391	0.000532789	5.50682e-08
221	1HP_0AM	50	Post	1.05532e+07	0.999678	2307.96	-99.7086	0.408504	0.0272215	1.22776e-06	2.00422e+06	0.00683822	45.8072	18.2271	0.0197773	0.000478179	3.91998e-08
222	1HP_0AM	500	Post	8.62981e+06	0.999987	2252.62	-99.4409	0.37823	0.0303376	1.6802e-06	1.86948e+06	0.00989864	59.0862	20.455	0.0205037	0.000546137	5.87817e-08
223	1HP_0AM	600	Post	8.63365e+06	0.999228	2263.63	-99.6175	0.377308	0.030788	1.71555e-06	1.83077e+06	0.00921439	58.1108	18.989	0.0204335	0.000549981	5.86371e-08
224	1HP_0AM	75	Post	1.03012e+07	0.999653	2303.28	-97.212	0.404076	0.0279313	1.27927e-06	2.02332e+06	0.00732972	48.4691	19.5218	0.0201146	0.000503595	4.18408e-08
225	1HP_0AM	750	Post	9.2881e+06	0.999215	2267.93	-98.9961	0.383797	0.0311962	1.73208e-06	1.8218e+06	0.00872331	58.6527	18.4883	0.0206113	0.000558175	5.99629e-08
226	1HP_0AM	10	Under	8.02913e+06	0.999546	1944.28	-97.6119	0.39374	0.0221592	8.74016e-07	1.7136e+06	0.00952595	40.8006	27.5168	0.0198117	0.000370815	3.69382e-08
227	1HP_0AM	100	Under	8.05738e+06	0.999532	1864.41	-94.4818	0.376865	0.023978	1.25394e-06	1.85836e+06	0.0139458	48.5931	29.6647	0.0217869	0.000395467	4.97718e-08
228	1HP_0AM	1000	Under	5.68884e+06	0.868681	1268.03	17.9059	0.328503	0.0210198	2.43022e-06	1.58802e+06	0.0558999	131.533	68.4332	0.0264773	0.000363404	1.98502e-07
229	1HP_0AM	1250	Under	5.40009e+06	0.845793	1154.11	33.0959	0.323257	0.0199595	2.64209e-06	1.47781e+06	0.0652571	141.915	70.4758	0.0256566	0.0003294	2.36384e-07
230	1HP_0AM	1400	Under	5.39751e+06	0.838241	1086.01	43.9675	0.323366	0.0194306	2.71514e-06	1.56005e+06	0.0704243	147.01	69.007	0.0277569	0.000344357	2.70665e-07
231	1HP_0AM	1500	Under	5.39846e+06	0.826794	1060.96	44.9985	0.323743	0.0190737	2.79022e-06	1.64103e+06	0.073879	148.63	71.5592	0.0287194	0.000345603	2.97948e-07
232	1HP_0AM	1600	Under	5.46876e+06	0.81706	1027.58	45.1438	0.32416	0.0188339	2.80968e-06	1.68868e+06	0.0760574	153.72	70.5167	0.0301547	0.00033845	3.4502e-07
233	1HP_0AM	1750	Under	5.86946e+06	0.817108	948.791	60.8569	0.332964	0.018381	2.83557e-06	1.64564e+06	0.0816224	159.47	70.6434	0.0293069	0.000327662	3.8503e-07
234	1HP_0AM	1850	Under	5.8693e+06	0.810788	920.143	66.5887	0.333386	0.0180077	2.88552e-06	1.72756e+06	0.0834858	159.352	69.9455	0.0310127	0.000331889	3.99826e-07
235	1HP_0AM	200	Under	8.22835e+06	0.989177	1766.23	-90.8877	0.374233	0.0241498	1.42478e-06	1.79738e+06	0.0197121	58.7202	37.2273	0.0218571	0.000396582	6.78057e-08
236	1HP_0AM	2000	Under	5.94402e+06	0.801361	876.596	71.5164	0.334725	0.0175783	2.93431e-06	1.69539e+06	0.0874451	168.607	71.5396	0.0313775	0.000315296	4.62503e-07
237	1HP_0AM	2250	Under	5.44837e+06	0.738664	888.612	34.1022	0.326804	0.0165649	2.95237e-06	1.7136e+06	0.101012	198.179	75.0998	0.0324874	0.000318501	6.89249e-07
238	1HP_0AM	25	Under	8.02409e+06	0.999309	1960.22	-99.0586	0.385836	0.0227673	1.01427e-06	1.83133e+06	0.00873374	40.0226	23.4365	0.0207155	0.000375424	3.83888e-08
239	1HP_0AM	250	Under	7.4063e+06	0.974476	1739.42	-89.1567	0.362382	0.0239919	1.52579e-06	1.75092e+06	0.0201616	59.9509	36.7902	0.0220103	0.000385662	7.24053e-08
240	1HP_0AM	2501	Under	5.06145e+06	0.717976	841.62	52.9346	0.319144	0.0157538	3.31383e-06	2.1474e+06	0.128533	305.367	73.3187	0.0465782	0.000396774	1.83333e-06
241	1HP_0AM	400	Under	6.55861e+06	0.937734	1644.06	-66.8484	0.346843	0.0234241	1.7506e-06	1.74445e+06	0.0324682	89.3124	53.3833	0.0232956	0.000389048	1.00058e-07
242	1HP_0AM	50	Under	8.61184e+06	0.999949	1926.36	-99.3458	0.388013	0.0234292	1.13477e-06	1.83048e+06	0.00990262	42.0147	24.4913	0.0212152	0.000382232	4.16779e-08
243	1HP_0AM	500	Under	6.63685e+06	0.909655	1602.34	-68.0411	0.346807	0.0230518	1.87833e-06	1.61809e+06	0.0378809	101.306	59.511	0.0231594	0.000375999	1.1187e-07
244	1HP_0AM	600	Under	6.76273e+06	0.901906	1519.93	-59.9712	0.348386	0.022813	1.93983e-06	1.61172e+06	0.0426431	112.689	63.3183	0.0243613	0.0003825	1.2652e-07
245	1HP_0AM	75	Under	8.38159e+06	0.999288	1897.42	-98.9321	0.382077	0.0238139	1.19898e-06	1.7495e+06	0.0105208	43.4513	24.9253	0.0206438	0.000374127	4.34513e-08
246	1HP_0AM	750	Under	6.23796e+06	0.884947	1428.26	-42.3661	0.339193	0.0221149	2.08679e-06	1.61901e+06	0.0482433	120.406	67.0423	0.0253129	0.000373825	1.55795e-07
247	1HP_10AM	1	Post	4.12554e+07	0.999287	36.06	88.2031	0.607596	0.00999258	1.78036e-06	6.22778e+06	0.0226689	7.15142	1.44106	0.0173048	0.000172309	3.78614e-07
248	1HP_10AM	10	Post	4.0846e+07	0.999244	29.0188	84.0858	0.628716	0.00875563	2.15662e-06	6.39738e+06	0.0317448	8.54097	1.30552	0.0181499	0.000186417	6.68341e-07
249	1HP_10AM	100	Post	3.25707e+07	0.996548	12.9448	78.2763	0.651869	0.00709042	1.5699e-06	7.20773e+06	0.143487	49.8498	1.3283	0.025402	0.000304542	3.73389e-05
250	1HP_10AM	1000	Post	2.10094e+07	0.996407	9.06331	73.2691	0.646823	0.00581054	2.26233e-06	4.28145e+06	0.113114	143.014	1.01822	0.0176951	0.000218111	2.55505e-05
251	1HP_10AM	1250	Post	2.09786e+07	0.996156	6.60055	73.1096	0.649995	0.0057628	2.47884e-06	3.82824e+06	0.105049	142.336	1.00705	0.016282	0.000202558	2.55706e-05
252	1HP_10AM	1500	Post	2.14735e+07	0.999508	8.02145	72.4457	0.650033	0.00588729	1.86117e-06	4.04152e+06	0.111537	134.469	1.00905	0.0170839	0.000233055	2.66079e-05
253	1HP_10AM	1750	Post	2.14195e+07	0.999942	6.27916	72.7174	0.651952	0.00584052	1.97414e-06	3.7228e+06	0.106341	133.596	1.01255	0.016303	0.00019775	2.59363e-05
254	1HP_10AM	2000	Post	2.15588e+07	0.998796	9.83191	74.2057	0.648011	0.00588652	2.08175e-06	4.31016e+06	0.11324	143.874	1.0517	0.0171152	0.000208328	2.62255e-05
255	1HP_10AM	2250	Post	2.17363e+07	0.996815	10.2263	74.7007	0.64513	0.00592333	1.92185e-06	4.44805e+06	0.118619	139.625	1.08464	0.017699	0.000233029	2.63676e-05
256	1HP_10AM	25	Post	3.54063e+07	0.998974	21.2371	81.3221	0.634907	0.00780808	2.07444e-06	6.14099e+06	0.0527639	9.53316	1.27158	0.0195647	0.000205477	1.21288e-06
257	1HP_10AM	250	Post	2.49551e+07	0.998904	13.5539	75.0206	0.64337	0.00635814	2.0966e-06	5.81125e+06	0.138963	92.4871	1.1205	0.022567	0.000312019	3.87194e-05
258	1HP_10AM	2500	Post	1.91823e+07	0.989663	9.52549	74.2374	0.637382	0.00580219	2.25052e-06	3.42317e+06	0.102729	120.95	1.02346	0.0148798	0.000183753	2.63716e-05
259	1HP_10AM	50	Post	3.01278e+07	0.995424	22.8172	79.6542	0.630086	0.0072492	2.43453e-06	7.48506e+06	0.0842456	12.9296	1.21435	0.0252403	0.000273584	1.05854e-05
260	1HP_10AM	500	Post	2.197e+07	0.998488	7.19437	73.3513	0.645806	0.00591467	1.58582e-06	4.06207e+06	0.125042	118.473	1.04446	0.0171102	0.00022705	2.78783e-05
261	1HP_10AM	75	Post	3.04223e+07	0.999291	20.6439	78.3586	0.638628	0.00711381	2.29092e-06	8.12005e+06	0.116743	24.7562	1.24222	0.0274988	0.000323162	3.46712e-05
262	1HP_10AM	750	Post	2.13881e+07	0.990814	10.4415	71.3794	0.64519	0.00588934	1.62091e-06	4.97441e+06	0.139912	135.081	1.10507	0.0216467	0.000303925	2.78046e-05
263	1HP_10AM	1	Under	5.2469e+07	0.999408	30.39	85.0026	0.642628	0.00933918	1.60478e-06	7.53555e+06	0.0220395	6.23786	1.39365	0.0166885	0.000178312	3.23058e-07
264	1HP_10AM	10	Under	4.01366e+07	0.998663	25.6327	82.1779	0.634586	0.00810408	2.07084e-06	6.43445e+06	0.0366732	8.67368	1.2517	0.0192297	0.000183404	7.64342e-07
265	1HP_10AM	100	Under	2.44097e+07	0.993512	16.4125	73.3773	0.631237	0.00604402	1.98678e-06	6.93023e+06	0.133317	34.7806	1.14465	0.028815	0.000277833	3.70425e-05
266	1HP_10AM	1000	Under	1.85477e+07	0.921202	5.15239	65.3836	0.651458	0.0046149	2.46919e-06	3.68011e+06	0.0945495	118.114	0.881432	0.0176269	0.000167877	2.41724e-05
267	1HP_10AM	1250	Under	2.35647e+07	0.994895	72.1611	65.159	0.68124	0.00468537	8.76746e-05	3.91212e+06	0.0830468	133.345	0.871881	0.0183528	0.00018897	2.20454e-05
268	1HP_10AM	1500	Under	2.28591e+07	0.948494	62.2141	64.8277	0.678683	0.00456592	7.24375e-05	4.09602e+06	0.0803421	137.974	0.881521	0.0182765	0.000181948	2.29915e-05
269	1HP_10AM	1750	Under	2.37607e+07	0.995663	72.6373	64.6277	0.684997	0.00451829	6.58367e-05	4.35512e+06	0.0751062	138.064	0.863034	0.0193475	0.000182707	2.21084e-05
270	1HP_10AM	2000	Under	2.4874e+07	0.988715	89.8362	64.2926	0.689855	0.00443983	5.93053e-05	4.63264e+06	0.0692406	145.163	0.856722	0.0200082	0.000184607	2.15771e-05
271	1HP_10AM	2250	Under	2.48709e+07	0.988789	101.899	64.2599	0.690357	0.00436569	5.91263e-05	4.57124e+06	0.0649152	146.66	0.841746	0.019792	0.000186153	2.17478e-05
272	1HP_10AM	25	Under	3.26258e+07	0.998154	22.2505	78.0504	0.631726	0.0071857	1.87639e-06	5.78747e+06	0.0641656	10.1719	1.2352	0.0200104	0.000186147	1.33722e-06
273	1HP_10AM	250	Under	1.98224e+07	0.9988	13.1744	69.7778	0.631216	0.0052587	2.19982e-06	4.98636e+06	0.132174	73.5625	1.01906	0.0228948	0.000252802	3.90062e-05
274	1HP_10AM	2500	Under	2.48697e+07	0.988851	104.781	64.1606	0.690914	0.00431255	5.89418e-05	4.81631e+06	0.0591445	143.823	0.838631	0.0204692	0.000182607	2.1847e-05
275	1HP_10AM	50	Under	2.68384e+07	0.998965	21.3709	75.8064	0.626772	0.00650422	2.06059e-06	6.20711e+06	0.0846503	11.4531	1.20158	0.0234947	0.000212769	4.0515e-06
276	1HP_10AM	500	Under	1.89153e+07	0.989824	5.82151	67.361	0.642841	0.00494042	2.02142e-06	3.44535e+06	0.123575	85.8434	0.900847	0.0157148	0.00015603	2.72554e-05
277	1HP_10AM	75	Under	2.6914e+07	0.999196	18.1431	74.6008	0.634583	0.00626677	2.13747e-06	6.46096e+06	0.11841	17.3444	1.17563	0.0256002	0.000245055	2.57184e-05
278	1HP_10AM	750	Under	1.87252e+07	0.992829	7.32542	65.5073	0.648856	0.00472309	2.82751e-06	3.36728e+06	0.110989	110.008	0.894687	0.0165231	0.000179242	2.57564e-05
279	1HP_20AM	1	Post	6.38488e+07	0.998488	18.6541	75.2954	0.718133	0.00653875	8.21365e-07	7.76539e+06	0.0583537	3.80088	1.41366	0.015588	0.00018259	1.91576e-07
280	1HP_20AM	10	Post	5.80968e+07	0.998183	22.5836	78.3759	0.689478	0.00692948	7.46075e-07	8.33392e+06	0.0768379	4.88729	1.71888	0.0174413	0.000175117	2.07307e-07
281	1HP_20AM	100	Post	2.89379e+07	0.995392	13.6906	73.2971	0.673723	0.00508665	6.96345e-07	5.5242e+06	0.214928	51.7365	1.91091	0.0274643	0.000277165	1.76207e-05
282	1HP_20AM	1000	Post	2.32628e+07	0.993304	11.5674	67.478	0.677356	0.004478	5.3594e-07	3.13634e+06	0.20684	8.16519	2.03553	0.0165075	0.000148469	5.36389e-07
283	1HP_20AM	1250	Post	2.4057e+07	0.998022	10.2215	68.9656	0.680656	0.00455166	5.31341e-07	3.63354e+06	0.210166	12.76	1.92146	0.0195866	0.000182517	1.756e-06
284	1HP_20AM	1500	Post	2.43605e+07	0.99931	9.52148	71.0152	0.680415	0.00460352	6.66969e-07	4.65717e+06	0.196773	96.1484	1.49745	0.030163	0.000332907	4.28221e-05
285	1HP_20AM	1750	Post	2.43577e+07	0.999726	9.23672	71.151	0.680085	0.00457866	7.31809e-07	4.69464e+06	0.190905	108.362	1.47825	0.0310341	0.00035011	4.43059e-05
286	1HP_20AM	2000	Post	2.43122e+07	0.99998	9.82192	71.6212	0.680078	0.00462244	6.19099e-07	4.27749e+06	0.207116	61.9763	1.70813	0.0257829	0.000274935	3.61236e-05
287	1HP_20AM	2250	Post	2.362e+07	0.99433	9.98171	71.8482	0.675645	0.00454643	5.78389e-07	4.14944e+06	0.206967	61.5221	1.71319	0.0247935	0.000269206	3.50841e-05
288	1HP_20AM	25	Post	4.92421e+07	0.998469	17.3766	76.8122	0.696605	0.00623113	6.77309e-07	6.65909e+06	0.109349	6.00491	1.75553	0.0180819	0.000173955	2.99301e-07
289	1HP_20AM	250	Post	2.2013e+07	0.994967	11.6627	70.33	0.666193	0.00458052	5.67292e-07	4.03323e+06	0.209597	36.2311	2.02511	0.0248027	0.00024155	1.12839e-05
290	1HP_20AM	2500	Post	2.3134e+07	0.999291	9.48075	71.6557	0.677666	0.00448963	7.16208e-07	4.25537e+06	0.187986	93.8494	1.5076	0.028472	0.000315616	4.37186e-05
291	1HP_20AM	50	Post	3.92779e+07	0.995835	16.9123	74.7912	0.688509	0.005666	6.18279e-07	5.5748e+06	0.187594	9.95052	2.2101	0.0183593	0.000176645	4.66422e-07
292	1HP_20AM	500	Post	2.28598e+07	0.990092	9.24211	71.2266	0.673197	0.00456103	7.93418e-07	5.06294e+06	0.170708	135.29	1.36376	0.0367837	0.000392052	4.48739e-05
293	1HP_20AM	75	Post	3.37924e+07	0.989829	15.6268	75.4916	0.680157	0.00543981	6.68957e-07	5.31762e+06	0.208375	16.3952	2.15965	0.0213197	0.00021057	1.64286e-06
294	1HP_20AM	750	Post	2.16636e+07	0.998064	9.27441	70.294	0.669996	0.0044232	7.00847e-07	4.82912e+06	0.163806	117.855	1.43886	0.0355299	0.000360664	4.48488e-05
295	1HP_20AM	1	Under	5.95844e+07	0.998585	18.7421	71.3714	0.731114	0.0059402	6.1249e-07	7.31903e+06	0.0576614	3.24591	1.48558	0.01533	0.000194662	1.2764e-07
296	1HP_20AM	10	Under	5.39305e+07	0.99857	21.8449	77.177	0.687603	0.00634405	7.11758e-07	8.55309e+06	0.11941	7.57969	1.94601	0.020997	0.000176643	3.53663e-07
297	1HP_20AM	100	Under	2.83051e+07	0.992414	12.087	70.4003	0.675119	0.00452143	6.85668e-07	6.92845e+06	0.206733	74.8724	1.81271	0.0401283	0.000289285	3.47027e-05
298	1HP_20AM	1000	Under	4.04199e+06	0.810725	698.711	61.9683	0.456551	0.00219628	9.9444e-05	6.70385e+06	0.042549	256.023	0.912784	0.111935	0.000394203	1.1004e-05
299	1HP_20AM	1250	Under	4.03019e+06	0.818433	725.382	61.5923	0.453402	0.00211899	9.99029e-05	5.95984e+06	0.0361741	229.885	0.889805	0.0902871	0.000336446	1.25495e-05
300	1HP_20AM	1500	Under	4.72053e+06	0.823235	721.968	61.259	0.472347	0.00207871	9.97304e-05	7.22389e+06	0.0360786	253.444	0.88816	0.100458	0.000412751	1.23552e-05
301	1HP_20AM	1750	Under	4.72163e+06	0.82589	682.538	60.7585	0.473785	0.00206544	9.69595e-05	8.92427e+06	0.034526	235.078	0.910347	0.105982	0.000459768	1.26761e-05
302	1HP_20AM	2000	Under	6.76478e+06	0.828437	681.602	60.4139	0.514172	0.00206165	9.97204e-05	9.11026e+06	0.0498514	223.954	0.872294	0.0864383	0.000494862	1.28593e-05
303	1HP_20AM	2250	Under	6.77401e+06	0.824092	660.829	59.9316	0.514031	0.00204316	9.89844e-05	1.03469e+07	0.0434282	226.4	0.854497	0.111606	0.000528883	1.29016e-05
304	1HP_20AM	25	Under	4.35885e+07	0.993771	17.7937	74.5186	0.686788	0.00562262	7.2329e-07	6.84788e+06	0.144968	7.50759	1.80498	0.0207465	0.000166353	4.52511e-07
305	1HP_20AM	250	Under	2.12526e+07	0.899435	10.8058	66.2236	0.665426	0.00383769	9.3758e-07	6.21812e+06	0.111826	254.628	1.33308	0.0917422	0.000389241	2.31277e-05
306	1HP_20AM	2500	Under	6.77372e+06	0.823866	651.551	59.8377	0.513993	0.00202793	9.899e-05	1.16151e+07	0.0788826	211.227	0.852465	0.0885836	0.000540686	1.22556e-05
307	1HP_20AM	50	Under	3.30496e+07	0.993108	15.3767	72.1937	0.674042	0.0049723	6.617e-07	7.38092e+06	0.210731	40.405	2.2059	0.0329228	0.000266118	9.22842e-06
308	1HP_20AM	500	Under	2.74159e+06	0.802528	774.018	63.5825	0.405179	0.00233118	9.98125e-05	5.46047e+06	0.0750764	280.771	1.01574	0.098911	0.000392354	1.40342e-05
309	1HP_20AM	75	Under	2.85467e+07	0.994549	13.9579	71.1045	0.668365	0.00467619	7.86259e-07	6.69087e+06	0.210193	80.3044	1.84145	0.0373996	0.0002926	3.68173e-05
310	1HP_20AM	750	Under	4.06433e+06	0.809449	714.822	62.8896	0.453502	0.00226986	9.97942e-05	5.75336e+06	0.0552264	246.71	0.945165	0.0960034	0.000352742	1.33318e-05
311	1LP_0AM	100	Post	1.12541e+07	0.949507	1783.45	535.921	0.409302	0.0312423	1.36632e-06	2.57238e+06	0.0897789	325.398	220.874	0.0248743	0.000812974	1.71682e-07
312	1LP_0AM	1000	Post	8.78199e+06	0.966977	1928.55	629.195	0.373036	0.0360224	1.76358e-06	1.99059e+06	0.0812337	319.117	181.061	0.0240062	0.000885058	1.76102e-07
313	1LP_0AM	1250	Post	8.91529e+06	0.95461	1989.99	547.14	0.373842	0.0357039	1.71066e-06	1.88974e+06	0.0801485	320.478	191.923	0.0231509	0.000826832	1.66537e-07
314	1LP_0AM	1400	Post	8.91925e+06	0.953605	2026.99	547.04	0.373875	0.0360774	1.69603e-06	1.92546e+06	0.0805704	315.859	188.618	0.02364	0.00085359	1.7079e-07
315	1LP_0AM	1500	Post	8.92019e+06	0.953664	2040.24	546.841	0.374577	0.0361935	1.69501e-06	1.94705e+06	0.0813659	329.495	192.474	0.0238179	0.000881055	1.65637e-07
316	1LP_0AM	1600	Post	8.59316e+06	0.950133	2097.83	502.173	0.370316	0.0360964	1.68955e-06	1.95603e+06	0.0783857	318.347	187.693	0.0238598	0.00088131	1.6223e-07
317	1LP_0AM	1750	Post	8.87761e+06	0.945129	2025.87	643.629	0.37255	0.0365932	1.78299e-06	1.97676e+06	0.0831016	330.288	190.24	0.0243788	0.000914688	1.75398e-07
318	1LP_0AM	1850	Post	9.014e+06	0.97088	1990.06	631.551	0.37458	0.036858	1.70893e-06	1.88394e+06	0.0819947	332.433	193.614	0.0232652	0.000897717	1.723e-07
319	1LP_0AM	200	Post	9.56013e+06	0.925848	1900.04	517.173	0.387403	0.0321211	1.49777e-06	2.22802e+06	0.0890603	322.117	207.875	0.0238276	0.000795207	1.75459e-07
320	1LP_0AM	2000	Post	9.01392e+06	0.970889	1991.63	631.549	0.374592	0.0365571	1.70943e-06	1.87011e+06	0.0823367	334.174	195.857	0.0233861	0.000881119	1.63276e-07
321	1LP_0AM	2251	Post	9.01301e+06	0.970581	1995.87	632.64	0.375158	0.0368851	1.68026e-06	1.90418e+06	0.0794025	321.334	192.938	0.0238408	0.000868528	1.64576e-07
322	1LP_0AM	25	Post	1.21198e+07	0.947129	1692.31	485.43	0.427162	0.0285383	1.1643e-06	2.63182e+06	0.083632	295.727	226.718	0.0234063	0.000718251	1.65055e-07
323	1LP_0AM	250	Post	1.07586e+07	0.96367	1838.94	510.686	0.398602	0.0328962	1.56779e-06	2.18342e+06	0.0817565	301.706	195.142	0.0236063	0.000793503	1.64862e-07
324	1LP_0AM	2501	Post	7.63049e+06	0.930565	2136.65	609.158	0.357668	0.0365961	1.70137e-06	2.20238e+06	0.112314	491.653	260.865	0.0305704	0.00115438	2.0614e-07
325	1LP_0AM	400	Post	8.62616e+06	0.942312	1921.55	544.499	0.372755	0.0335127	1.64992e-06	2.09077e+06	0.0867758	324.15	195.512	0.0245222	0.000838812	1.68216e-07
326	1LP_0AM	50	Post	1.10391e+07	0.930577	1655.85	624.285	0.41244	0.0298005	1.29214e-06	2.43963e+06	0.100366	346.805	245.052	0.0232899	0.000764325	1.92325e-07
327	1LP_0AM	500	Post	8.49731e+06	0.933093	2003.58	501.73	0.370616	0.0340429	1.65411e-06	2.05549e+06	0.0866679	329.1	194.01	0.0247955	0.000868514	1.70073e-07
328	1LP_0AM	600	Post	8.49701e+06	0.93322	2029.82	501.768	0.370653	0.0341614	1.67365e-06	1.96549e+06	0.0816389	309.691	191.669	0.0227709	0.000805893	1.65305e-07
329	1LP_0AM	75	Post	1.10831e+07	0.933828	1771.43	530.795	0.409549	0.0306193	1.30166e-06	2.57429e+06	0.0939138	336.184	230.125	0.0244619	0.000800386	1.80919e-07
330	1LP_0AM	750	Post	8.63335e+06	0.924453	2075.02	463.246	0.370075	0.034653	1.66717e-06	1.9724e+06	0.0798068	314.17	188.993	0.0238199	0.000821232	1.61802e-07
331	1LP_0AM	10	Under	7.1234e+06	0.825728	1530.5	353.505	0.373489	0.0233509	8.64063e-07	1.78712e+06	0.110132	333.968	258.572	0.0250775	0.000509368	2.19362e-07
332	1LP_0AM	100	Under	9.2978e+06	0.974695	1385.39	528.971	0.388001	0.0266855	1.353e-06	1.98788e+06	0.0802864	233.075	171.122	0.023326	0.000527513	1.69965e-07
333	1LP_0AM	1000	Under	6.3984e+06	0.942679	1376.24	296.355	0.335461	0.0266025	2.12186e-06	1.63485e+06	0.0631742	162.676	88.3562	0.0258246	0.000501538	1.68042e-07
334	1LP_0AM	1250	Under	6.78502e+06	0.964	1245.28	311.619	0.341076	0.0263779	2.23046e-06	1.61851e+06	0.0614547	148.637	79.2058	0.025022	0.000461948	1.83986e-07
335	1LP_0AM	1400	Under	6.70702e+06	0.972273	1201.19	304.926	0.339852	0.0261528	2.27228e-06	1.5429e+06	0.0649859	155.2	80.5189	0.0246815	0.00046347	1.95774e-07
336	1LP_0AM	1500	Under	6.72369e+06	0.97233	1186.37	304.793	0.338964	0.0260225	2.32379e-06	1.55289e+06	0.0611303	142.984	74.5555	0.0246137	0.00044817	1.88151e-07
337	1LP_0AM	1600	Under	6.72357e+06	0.973396	1163.33	304.786	0.339035	0.0258938	2.33695e-06	1.5426e+06	0.0624003	141.473	72.477	0.0244173	0.000446836	1.98302e-07
338	1LP_0AM	1750	Under	6.16451e+06	0.955548	1165.89	300.201	0.330514	0.025503	2.49031e-06	1.60508e+06	0.0632411	142.031	70.9347	0.0252097	0.000445698	2.07103e-07
339	1LP_0AM	1850	Under	6.20577e+06	0.929038	1197.07	267.014	0.330778	0.0253211	2.49011e-06	1.58182e+06	0.0654251	147.807	71.0627	0.025506	0.000447348	2.1462e-07
340	1LP_0AM	200	Under	7.89418e+06	0.964128	1474.9	445.279	0.366414	0.0269742	1.49053e-06	1.86971e+06	0.0763634	223.752	157.832	0.024085	0.000530376	1.6132e-07
341	1LP_0AM	2000	Under	6.20498e+06	0.934082	1163.78	265.237	0.330917	0.0250959	2.51195e-06	1.50076e+06	0.0646608	141.063	69.7621	0.0243962	0.00042309	2.16627e-07
342	1LP_0AM	2251	Under	6.21766e+06	0.928358	1118.94	260.391	0.33086	0.0247031	2.59199e-06	1.55918e+06	0.0670163	143.337	66.5052	0.0257187	0.000431966	2.38352e-07
343	1LP_0AM	25	Under	9.7519e+06	0.97367	1288.85	595.343	0.403208	0.0250269	1.17242e-06	2.10092e+06	0.088555	265.452	209.207	0.0230905	0.000522268	1.86807e-07
344	1LP_0AM	250	Under	7.21165e+06	0.929593	1570.05	377.167	0.354757	0.0270213	1.56533e-06	1.76835e+06	0.0794395	233.397	157.573	0.0243137	0.00053479	1.64714e-07
345	1LP_0AM	2500	Under	6.35207e+06	0.959467	1016.56	291.601	0.333518	0.0244138	2.67851e-06	2.21306e+06	0.13194	347.679	118.121	0.0434572	0.00075545	6.14817e-07
346	1LP_0AM	400	Under	8.0206e+06	0.972634	1426.55	410.8	0.36314	0.0275568	1.69784e-06	1.71407e+06	0.0675099	191.389	127.858	0.0239447	0.000508276	1.55898e-07
347	1LP_0AM	50	Under	9.46965e+06	0.934925	1395.26	521.777	0.394259	0.0259129	1.18772e-06	2.07612e+06	0.0985479	297.37	224.68	0.024044	0.000546262	1.99462e-07
348	1LP_0AM	500	Under	7.72247e+06	0.978386	1420.55	374.144	0.358803	0.0275442	1.75384e-06	1.75116e+06	0.0678651	191.479	118.052	0.0248392	0.000522243	1.55693e-07
349	1LP_0AM	600	Under	7.3423e+06	0.983654	1388.69	366.241	0.352189	0.0274516	1.84297e-06	1.65229e+06	0.0591511	160.271	102.784	0.0239146	0.000493355	1.57201e-07
350	1LP_0AM	75	Under	9.3159e+06	0.968871	1387.61	536.564	0.38889	0.0262151	1.31279e-06	2.03365e+06	0.0831887	245.723	185.402	0.0237862	0.000531885	1.74223e-07
351	1LP_0AM	750	Under	7.16786e+06	0.983025	1338.42	371.154	0.348963	0.0272866	1.98572e-06	1.58244e+06	0.0615562	162.943	95.3905	0.0237023	0.0004816	1.59918e-07
352	1LP_10AM	1	Post	6.39575e+07	0.97105	32.8634	63.0625	0.68528	0.0077667	3.13843e-07	8.0756e+06	0.184541	18.3873	12.9682	0.0156912	0.000160343	9.89184e-08
353	1LP_10AM	10	Post	5.67861e+07	0.938513	34.0712	62.1864	0.670415	0.00772913	2.60279e-07	7.39761e+06	0.182152	19.2372	14.5243	0.0153422	0.000148961	1.01251e-07
354	1LP_10AM	100	Post	3.25105e+07	0.929911	26.4436	58.6608	0.666954	0.00576694	2.04739e-07	3.7967e+06	0.176812	25.6177	24.0643	0.0134676	0.000116636	9.75397e-08
355	1LP_10AM	1000	Post	1.72885e+07	0.990301	14.5262	57.8708	0.656359	0.0042744	1.62006e-07	1.98421e+06	0.161815	26.1147	26.4022	0.0130021	9.36428e-05	8.35655e-08
356	1LP_10AM	1250	Post	1.72959e+07	0.992278	11.9148	59.9565	0.658586	0.00425622	1.98773e-07	1.97147e+06	0.166888	21.8129	21.558	0.0127378	9.26072e-05	9.28493e-08
357	1LP_10AM	1500	Post	1.75083e+07	0.993375	13.9842	59.5022	0.655466	0.00435291	1.9944e-07	2.12003e+06	0.157179	31.1836	31.2483	0.0128741	9.4896e-05	7.98091e-08
358	1LP_10AM	1750	Post	1.61667e+07	0.973749	13.6051	57.7794	0.653042	0.0041558	1.56371e-07	1.84973e+06	0.163431	26.2671	26.2257	0.0125127	8.99286e-05	9.04987e-08
359	1LP_10AM	2000	Post	1.6912e+07	0.995602	14.6	59.3452	0.651379	0.00428231	1.86065e-07	2.06238e+06	0.150858	29.2164	29.2163	0.0127781	9.37489e-05	7.97498e-08
360	1LP_10AM	2250	Post	1.69104e+07	0.995459	15.1007	59.3638	0.6514	0.00428929	1.77224e-07	2.02002e+06	0.152479	30.1325	29.6484	0.0126694	9.27599e-05	7.5861e-08
361	1LP_10AM	25	Post	4.71148e+07	0.963884	30.2816	62.2765	0.670649	0.00694594	2.56689e-07	5.85878e+06	0.183783	21.7675	18.4868	0.0146106	0.000134071	1.06564e-07
362	1LP_10AM	250	Post	2.31855e+07	0.998544	16.83	59.614	0.663481	0.0048049	1.99226e-07	2.48654e+06	0.176093	22.3993	21.3694	0.0128344	9.89219e-05	9.58054e-08
363	1LP_10AM	2500	Post	1.61247e+07	0.984086	12.8568	59.2754	0.65241	0.00411657	1.88682e-07	1.92699e+06	0.161832	22.9538	22.801	0.0130724	9.24576e-05	9.26401e-08
364	1LP_10AM	50	Post	3.83984e+07	0.966493	25.253	61.2813	0.671934	0.0061716	2.341e-07	4.6462e+06	0.181798	19.8651	17.6177	0.0145069	0.000125138	1.01198e-07
365	1LP_10AM	500	Post	1.86895e+07	0.960173	14.8514	59.689	0.654166	0.00449545	2.14709e-07	2.30714e+06	0.1793	19.4211	19.1403	0.0135027	0.000103079	1.15018e-07
366	1LP_10AM	75	Post	3.30536e+07	0.978606	25.0626	59.5367	0.666824	0.00579344	2.13436e-07	3.92916e+06	0.177103	26.9343	25.4539	0.0136308	0.000115814	9.6315e-08
367	1LP_10AM	750	Post	1.80592e+07	0.997946	12.3515	60.8286	0.657312	0.00436941	2.18241e-07	2.04656e+06	0.170157	20.348	20.4605	0.0127967	9.55314e-05	1.03576e-07
368	1LP_10AM	1	Under	6.92956e+07	0.980469	30.7813	59.526	0.711284	0.00701849	3.04806e-07	7.98294e+06	0.181115	17.5959	12.9874	0.0145735	0.000165104	9.943e-08
369	1LP_10AM	10	Under	5.76267e+07	0.938609	33.7247	60.0532	0.679358	0.00714963	2.53763e-07	7.1505e+06	0.184017	21.73	17.3458	0.0154509	0.000137899	1.05135e-07
370	1LP_10AM	100	Under	3.00478e+07	0.908749	22.5725	57.4384	0.666012	0.005069	2.09291e-07	3.71725e+06	0.17577	23.5093	22.8317	0.0145168	0.000104588	1.01019e-07
371	1LP_10AM	1000	Under	1.767e+07	0.987454	9.4954	56.2604	0.663775	0.00364402	2.24174e-07	2.20923e+06	0.175877	13.6697	13.7058	0.013635	8.52222e-05	1.12753e-07
372	1LP_10AM	1250	Under	1.91476e+07	0.988978	9.00824	55.5419	0.676282	0.00362789	2.04288e-07	2.14315e+06	0.16884	13.9736	13.8336	0.0130908	8.21116e-05	1.03676e-07
373	1LP_10AM	1500	Under	1.91647e+07	0.997831	8.62823	55.0609	0.678852	0.00357405	1.82613e-07	2.26164e+06	0.167427	14.9321	15.0852	0.0138663	8.8523e-05	1.03381e-07
374	1LP_10AM	1750	Under	1.91519e+07	0.984843	8.24729	54.7894	0.680501	0.00353444	1.8384e-07	2.22006e+06	0.16759	22.9136	23.4321	0.0137685	8.58643e-05	9.63309e-08
375	1LP_10AM	2000	Under	1.92033e+07	0.998186	7.71631	55.1582	0.682767	0.00349302	1.90432e-07	2.26927e+06	0.16816	19.0449	19.2291	0.0136286	8.41932e-05	1.11098e-07
376	1LP_10AM	2250	Under	1.91709e+07	0.980043	8.10793	54.6753	0.683641	0.00345444	1.77326e-07	2.20886e+06	0.158765	17.6827	17.9236	0.0130013	8.40336e-05	9.51911e-08
377	1LP_10AM	25	Under	4.60583e+07	0.974984	24.8876	62.9817	0.678364	0.0062919	2.9148e-07	5.75247e+06	0.186011	13.4831	9.12161	0.0156093	0.000131863	1.00947e-07
378	1LP_10AM	250	Under	2.30074e+07	0.989632	14.2497	58.7745	0.663171	0.00432873	2.61533e-07	2.78173e+06	0.177734	14.3211	13.5095	0.0138864	9.09228e-05	1.17882e-07
379	1LP_10AM	2500	Under	1.9199e+07	0.98413	8.25218	54.2162	0.684525	0.00341658	1.64901e-07	2.14286e+06	0.15935	21.3044	21.2772	0.0126603	8.3455e-05	9.39499e-08
380	1LP_10AM	50	Under	3.68123e+07	0.996305	20.7826	63.3949	0.670638	0.00565874	2.9971e-07	4.74457e+06	0.19071	14.2236	10.8343	0.0153479	0.000121151	1.11236e-07
381	1LP_10AM	500	Under	1.98681e+07	0.967431	11.2587	57.0346	0.665497	0.00393372	2.36632e-07	2.35288e+06	0.177541	12.7491	12.3858	0.0136103	8.6268e-05	1.20353e-07
382	1LP_10AM	75	Under	3.38047e+07	0.929073	23.3019	57.5239	0.673138	0.00533803	2.03425e-07	4.09343e+06	0.17709	20.4486	19.121	0.0147265	0.000111461	1.08853e-07
383	1LP_10AM	750	Under	1.83822e+07	0.99349	10.0451	56.7184	0.664206	0.00375384	2.2697e-07	2.30244e+06	0.170679	14.7199	14.6048	0.0139316	8.69264e-05	1.10189e-07
384	1LP_20AM	1	Post	6.76735e+07	0.974763	249.057	49.0659	0.881332	0.00447742	8.32557e-05	1.1928e+07	0.0415823	94.987	0.832379	0.0437552	0.00195025	1.28069e-05
385	1LP_20AM	10	Post	4.876e+07	0.976239	16.1784	45.8552	0.770131	0.0039861	1.2205e-07	4.80903e+06	0.12706	42.357	42.2078	0.0135065	0.00016424	5.41219e-08
386	1LP_20AM	100	Post	3.18097e+07	0.985505	12.9108	46.8734	0.738325	0.00344439	1.245e-07	3.17862e+06	0.129907	43.8158	44.0896	0.0127597	0.000108579	4.97259e-08
387	1LP_20AM	1000	Post	2.6702e+07	0.985731	9.06505	41.3136	0.750588	0.00279769	5.14272e-08	2.42036e+06	0.129258	45.684	45.9622	0.0115442	8.76663e-05	3.94683e-08
388	1LP_20AM	1250	Post	2.71935e+07	0.94825	95.875	-44.3362	0.751233	0.00284553	4.28151e-09	2.57721e+06	0.110961	43.6226	43.6811	0.012259	9.68554e-05	3.0759e-08
389	1LP_20AM	1500	Post	2.56972e+07	0.978737	7.83931	41.7196	0.750785	0.00271775	5.37591e-08	2.50413e+06	0.124963	45.0055	45.3301	0.0124642	9.66414e-05	3.79662e-08
390	1LP_20AM	1750	Post	2.71718e+07	0.999056	16.0824	35.6232	0.753269	0.00283673	3.2553e-08	2.57107e+06	0.107164	48.7321	48.8143	0.0121514	9.61174e-05	2.59743e-08
391	1LP_20AM	2000	Post	2.63243e+07	0.994485	137.17	-86.4055	0.752473	0.00276665	3.32034e-09	2.40996e+06	0.110781	51.167	51.3312	0.011505	9.46402e-05	1.78008e-08
392	1LP_20AM	2250	Post	2.6326e+07	0.994513	138.044	-86.5697	0.752074	0.0027938	3.77965e-09	2.40786e+06	0.0970825	49.6557	49.5454	0.0114025	9.05483e-05	1.68149e-08
393	1LP_20AM	25	Post	3.86175e+07	0.992459	13.9841	47.7672	0.74824	0.00377429	1.33547e-07	4.00372e+06	0.129369	37.9697	38.0754	0.0130845	0.00012914	6.35455e-08
394	1LP_20AM	250	Post	2.88975e+07	0.99541	9.15776	44.9211	0.744365	0.00304681	9.27914e-08	2.98005e+06	0.135098	33.6298	33.7069	0.0133133	9.84824e-05	6.41695e-08
395	1LP_20AM	2500	Post	2.633e+07	0.996988	137.242	-86.0423	0.753688	0.00279154	3.95278e-09	2.48903e+06	0.102356	50.6014	50.669	0.0119437	9.74768e-05	2.40786e-08
396	1LP_20AM	50	Post	3.45533e+07	0.9942	13.9837	47.2057	0.740485	0.00358442	1.33814e-07	3.54228e+06	0.13007	35.2812	35.2155	0.0128637	0.000114777	5.82773e-08
397	1LP_20AM	500	Post	2.77061e+07	0.996775	13.7377	40.0918	0.743823	0.00294563	5.43182e-08	2.61931e+06	0.115302	46.2684	46.5982	0.0122069	8.87097e-05	4.01412e-08
398	1LP_20AM	75	Post	3.24288e+07	0.998508	16.4431	44.5942	0.737135	0.00354596	1.0203e-07	3.4285e+06	0.123631	44.1134	44.1944	0.0131771	0.000113328	4.45594e-08
399	1LP_20AM	750	Post	2.70907e+07	0.998543	7.08536	44.3479	0.748195	0.0028506	7.89199e-08	2.60642e+06	0.122175	39.72	40.2123	0.0125885	9.49983e-05	4.79439e-08
400	1LP_20AM	1	Under	6.76657e+07	0.99666	229.339	47.3777	0.904962	0.00821534	8.40857e-05	9.25287e+06	0.0431286	85.2384	0.763045	0.0404193	0.00414555	1.29916e-05
401	1LP_20AM	10	Under	5.36247e+07	0.936012	18.1099	39.7235	0.793164	0.00376532	7.72447e-08	4.75769e+06	0.127892	37.8009	37.946	0.0131641	0.000186121	4.59213e-08
402	1LP_20AM	100	Under	2.82013e+07	0.966008	9.11887	46.5653	0.729703	0.00292896	1.39861e-07	3.31103e+06	0.158542	27.3449	27.377	0.014717	9.44415e-05	6.64676e-08
403	1LP_20AM	1000	Under	1.57805e+06	0.829607	625.961	48.0491	0.339317	0.00145686	9.99697e-05	5.15605e+06	0.0200707	126.674	0.684822	0.140699	0.000132488	6.35065e-06
404	1LP_20AM	1250	Under	1.58014e+06	0.832737	629.902	47.8134	0.339728	0.00143332	9.99892e-05	6.06435e+06	0.0216324	131.874	0.662697	0.153204	0.000142184	6.67464e-06
405	1LP_20AM	1500	Under	1.58077e+06	0.833625	630.452	47.4352	0.338217	0.00141657	9.99603e-05	6.30214e+06	0.0185613	130.349	0.673254	0.157034	0.000139324	6.78415e-06
406	1LP_20AM	1750	Under	1.58123e+06	0.832278	622.838	47.275	0.337314	0.0014092	9.97351e-05	6.33766e+06	0.0169304	126.241	0.6641	0.154438	0.000133628	6.88792e-06
407	1LP_20AM	2000	Under	1.582e+06	0.832259	619.277	47.0521	0.337127	0.00140103	9.97467e-05	7.44465e+06	0.0180001	135.038	0.668402	0.160993	0.000152468	6.79256e-06
408	1LP_20AM	2250	Under	1.58158e+06	0.832307	621.739	47.1794	0.334654	0.00139389	9.96724e-05	6.55111e+06	0.0159768	112.819	0.664776	0.142692	0.000122005	6.45481e-06
409	1LP_20AM	25	Under	3.57481e+07	0.995727	11.5415	47.7526	0.742369	0.00333471	1.53833e-07	4.25362e+06	0.151811	21.7077	22.2791	0.0146291	0.000123748	7.58481e-08
410	1LP_20AM	250	Under	2.15219e+07	0.627242	9.48256	46.8958	0.710718	0.0025981	3.73047e-07	6.24328e+06	0.098233	212.054	0.963317	0.118042	0.000267892	1.01442e-05
411	1LP_20AM	2500	Under	1.50191e+06	0.829787	618.682	46.9179	0.327977	0.00137849	9.98495e-05	8.566e+06	0.0168668	117.535	0.668995	0.134244	0.000147987	6.34907e-06
412	1LP_20AM	50	Under	3.28721e+07	0.99704	10.9855	46.4558	0.740435	0.00317071	1.2802e-07	3.66165e+06	0.140316	34.9234	34.9822	0.014018	0.000101981	5.41035e-08
413	1LP_20AM	500	Under	2.24821e+06	0.809872	564.088	48.6918	0.39151	0.00157357	9.95415e-05	5.35849e+06	0.0326532	144.198	0.760145	0.121915	0.000163612	7.57007e-06
414	1LP_20AM	75	Under	3.03557e+07	0.995245	8.46067	48.0482	0.735612	0.00304554	1.63263e-07	3.46978e+06	0.152562	25.448	25.5811	0.0141704	9.91496e-05	7.14064e-08
415	1LP_20AM	750	Under	2.37379e+06	0.82078	583.544	48.3621	0.392479	0.001515	9.87688e-05	4.57322e+06	0.0233173	132.299	0.712101	0.129821	0.000134197	7.42013e-06
416	2HP_0AM	10	Post	1.91323e+07	0.998133	1917.47	-97.5331	0.476721	0.0193703	1.54077e-06	4.41026e+06	0.0127786	50.9079	26.5774	0.0258602	0.000425288	5.90258e-08
417	2HP_0AM	100	Post	1.3982e+07	0.944471	1777.08	-43.2746	0.425136	0.0200246	2.38883e-06	4.20087e+06	0.0317475	103.714	49.4857	0.0295808	0.000453739	1.23179e-07
418	2HP_0AM	1000	Post	1.18271e+07	0.907431	1381.73	56.469	0.400709	0.0192546	3.48601e-06	3.81175e+06	0.0529739	150.835	52.872	0.0342345	0.000450548	2.85251e-07
419	2HP_0AM	1250	Post	1.2321e+07	0.892156	1422.74	33.0978	0.406224	0.0188766	3.41185e-06	3.85524e+06	0.051094	142.368	51.8698	0.0344943	0.000434854	2.58996e-07
420	2HP_0AM	1400	Post	1.28865e+07	0.905213	1370.72	36.8749	0.410951	0.0189673	3.32686e-06	4.00657e+06	0.0519469	149.086	52.1044	0.0345456	0.000456196	2.76426e-07
421	2HP_0AM	1500	Post	1.12797e+07	0.890435	1414.14	48.0589	0.396702	0.0188866	3.54044e-06	3.86161e+06	0.0515893	149.784	51.7622	0.0346023	0.000454476	2.83605e-07
422	2HP_0AM	1600	Post	1.12796e+07	0.890634	1386.12	47.9083	0.396881	0.0190264	3.5707e-06	3.74547e+06	0.0509309	144.067	51.2304	0.0331883	0.000430078	2.90213e-07
423	2HP_0AM	1750	Post	1.10848e+07	0.890721	1420.01	33.9481	0.394204	0.0187927	3.47088e-06	3.67413e+06	0.0504326	142.527	52.0211	0.0327988	0.000422715	2.74011e-07
424	2HP_0AM	1850	Post	1.10492e+07	0.888296	1388.31	35.3256	0.394299	0.0189278	3.59476e-06	3.79823e+06	0.0506855	140.631	48.7947	0.0331632	0.000432385	2.8245e-07
425	2HP_0AM	200	Post	1.28123e+07	0.921112	1640.38	-3.14511	0.411638	0.0194538	2.81171e-06	3.70893e+06	0.0418836	125.558	57.1463	0.0299751	0.000418499	1.66154e-07
426	2HP_0AM	2000	Post	1.06842e+07	0.887388	1427.03	36.8589	0.392264	0.0186347	3.46752e-06	3.80555e+06	0.05112	142.082	53.0079	0.0331397	0.000431384	2.64193e-07
427	2HP_0AM	2250	Post	1.3073e+07	0.89668	1396.76	38.5361	0.413029	0.0190073	3.41822e-06	4.37545e+06	0.0540721	152.84	55.7847	0.035003	0.000474512	2.78241e-07
428	2HP_0AM	25	Post	1.69224e+07	0.97817	1908.14	-89.6338	0.455537	0.0198759	1.79127e-06	4.69094e+06	0.0168928	62.12	30.7185	0.0279691	0.0004594	7.8774e-08
429	2HP_0AM	250	Post	1.22928e+07	0.907877	1631.41	-10.272	0.406844	0.019269	2.96681e-06	4.06649e+06	0.0429631	128.376	54.4096	0.0318145	0.000440784	1.75285e-07
430	2HP_0AM	2501	Post	1.21708e+07	0.891151	1369.45	41.6623	0.405003	0.0188613	3.43925e-06	3.92785e+06	0.0560331	158.104	57.6797	0.0347216	0.000448953	3.15341e-07
431	2HP_0AM	400	Post	1.28316e+07	0.917981	1483.44	28.7716	0.41174	0.0191512	3.13454e-06	4.02278e+06	0.0494215	140.326	56.6874	0.03292	0.000438952	2.11136e-07
432	2HP_0AM	50	Post	1.5146e+07	0.954823	1889.39	-84.5531	0.43862	0.019987	2.06738e-06	4.54775e+06	0.0241129	83.5198	41.6587	0.028444	0.000465961	9.88807e-08
433	2HP_0AM	500	Post	1.15563e+07	0.895537	1517.29	7.70956	0.399157	0.0190629	3.24367e-06	3.77852e+06	0.0492647	143.82	55.3017	0.0329578	0.000431764	2.27034e-07
434	2HP_0AM	600	Post	1.15562e+07	0.895551	1503.56	7.70522	0.399095	0.0189975	3.24712e-06	4.04911e+06	0.0481166	141.493	53.2893	0.0340664	0.000447294	2.32511e-07
435	2HP_0AM	75	Post	1.43198e+07	0.941335	1833.61	-37.1187	0.429056	0.0199983	2.30026e-06	4.40732e+06	0.03215	103.743	53.8138	0.0292586	0.000458006	1.17682e-07
436	2HP_0AM	750	Post	1.11349e+07	0.896094	1486.85	32.7562	0.394702	0.0189827	3.42366e-06	3.94918e+06	0.0513589	147.997	53.6727	0.03462	0.00046023	2.69398e-07
437	2HP_0AM	10	Under	1.20347e+07	0.971395	1708.36	-82.1043	0.423496	0.0164892	1.43093e-06	3.50321e+06	0.020628	61.0084	46.0558	0.0284189	0.000315529	6.7171e-08
438	2HP_0AM	100	Under	1.10426e+07	0.962491	1376.59	41.3785	0.39428	0.016697	2.37915e-06	3.10002e+06	0.0426792	106.122	58.362	0.031155	0.000298432	1.26019e-07
439	2HP_0AM	1000	Under	8.99634e+06	0.705748	587.702	80.4548	0.377557	0.0101152	3.75632e-06	3.83968e+06	0.108928	169.949	53.5689	0.0485185	0.000201799	1.36191e-06
440	2HP_0AM	1250	Under	9.76735e+06	0.676833	499.438	82.1981	0.392635	0.00893027	3.4602e-06	3.88281e+06	0.0964628	128.448	47.688	0.044691	0.000163139	1.26384e-06
441	2HP_0AM	1400	Under	1.12893e+07	0.613397	497.031	49.5128	0.413665	0.00831313	2.82495e-06	4.26596e+06	0.087905	108.286	44.1009	0.0435199	0.000148745	1.13122e-06
442	2HP_0AM	1500	Under	1.11939e+07	0.613705	474.861	51.3432	0.416553	0.00786934	2.78384e-06	4.99799e+06	0.0930662	100.479	42.7114	0.0460413	0.000148374	8.96915e-07
443	2HP_0AM	1600	Under	1.2507e+07	0.603445	452.431	41.6096	0.432996	0.00756366	2.30211e-06	4.93887e+06	0.0901575	89.2369	44.6625	0.0415346	0.000131936	7.49288e-07
444	2HP_0AM	1750	Under	1.27575e+07	0.595033	418.641	42.0553	0.440273	0.00710288	2.03003e-06	5.38098e+06	0.0942197	83.981	45.2298	0.0423933	0.000127969	7.03162e-07
445	2HP_0AM	1850	Under	1.3183e+07	0.613339	386.037	55.8383	0.447968	0.00677744	2.08933e-06	5.67552e+06	0.0957914	80.1848	42.4883	0.0437225	0.000130009	6.5096e-07
446	2HP_0AM	200	Under	8.91271e+06	0.924189	1203.14	69.3478	0.368393	0.0157933	2.96735e-06	3.06548e+06	0.0498436	111.642	51.6732	0.0344238	0.000291633	1.86771e-07
447	2HP_0AM	2000	Under	1.63128e+07	0.668357	324.914	69.9222	0.478161	0.00643034	1.75977e-06	6.14622e+06	0.104686	79.5604	43.576	0.0431013	0.000126961	5.96839e-07
448	2HP_0AM	2250	Under	1.7123e+07	0.646292	304.523	64.4558	0.493722	0.00585936	1.56416e-06	6.92369e+06	0.108867	75.6537	45.6064	0.0427567	0.000118696	4.84582e-07
449	2HP_0AM	25	Under	1.23234e+07	0.982611	1605.64	-26.136	0.417468	0.0167794	1.74898e-06	3.51294e+06	0.0206524	63.4622	46.0581	0.0292788	0.0003054	8.14963e-08
450	2HP_0AM	250	Under	7.7655e+06	0.915234	1120.9	86.1505	0.35271	0.0153581	3.15616e-06	2.91905e+06	0.053137	112.297	48.9629	0.0351628	0.000279091	2.20244e-07
451	2HP_0AM	2501	Under	2.26107e+07	0.73141	238.87	88.6348	0.536513	0.00540146	1.49382e-06	7.48058e+06	0.096718	70.6881	38.8057	0.0626009	0.000141581	8.42069e-07
452	2HP_0AM	400	Under	8.73746e+06	0.864476	942.826	82.3672	0.365008	0.0141532	3.47552e-06	3.32057e+06	0.0617335	117.44	43.6629	0.0414608	0.000269544	3.46623e-07
453	2HP_0AM	50	Under	1.10835e+07	0.952684	1557.13	-17.0698	0.399506	0.0168125	1.99276e-06	3.33984e+06	0.0350624	95.8902	59.1054	0.0318686	0.000315968	1.04451e-07
454	2HP_0AM	500	Under	7.95725e+06	0.840126	862.4	95.4482	0.354221	0.0133307	3.85208e-06	3.17177e+06	0.0684068	121.592	44.7491	0.0406703	0.000254502	4.498e-07
455	2HP_0AM	600	Under	7.68387e+06	0.803861	796.406	95.6916	0.351936	0.0125537	4.10653e-06	3.36323e+06	0.078557	134.991	46.1964	0.0445672	0.000244987	5.9533e-07
456	2HP_0AM	75	Under	1.01614e+07	0.950829	1472.52	9.11988	0.387573	0.0167089	2.21405e-06	3.2269e+06	0.0388448	100.685	57.7767	0.0321961	0.000307078	1.13408e-07
457	2HP_0AM	750	Under	8.59607e+06	0.785004	674.733	101.73	0.367335	0.0115643	3.97781e-06	3.19762e+06	0.094322	155.853	52.5426	0.0446302	0.000225354	8.95679e-07
458	2HP_10AM	1	Post	5.34418e+07	0.99987	45.0763	122.629	0.608522	0.013685	2.01946e-06	8.64001e+06	0.0295679	12.5394	1.96222	0.017582	0.000264683	6.40124e-07
459	2HP_10AM	10	Post	4.51508e+07	0.998866	30.9965	114.272	0.616882	0.0122128	2.41831e-06	1.18357e+07	0.115091	52.1847	1.89369	0.0263137	0.00046276	3.55315e-05
460	2HP_10AM	100	Post	2.88136e+07	0.988722	12.8765	103.307	0.622547	0.00926602	3.49026e-06	4.63783e+06	0.103532	153.463	1.41895	0.0142275	0.000264413	2.94283e-05
461	2HP_10AM	1000	Post	2.0422e+07	0.966317	110.085	95.8791	0.622781	0.0075233	3.02413e-05	3.79226e+06	0.0556309	215.92	1.34383	0.0170642	0.000293554	2.7121e-05
462	2HP_10AM	1250	Post	1.79584e+07	0.990651	79.1481	96.0226	0.604283	0.00745065	1.56184e-05	3.31228e+06	0.0492533	153.501	1.33994	0.0179563	0.000324791	2.80007e-05
463	2HP_10AM	1500	Post	2.22669e+07	0.969635	98.3969	96.5277	0.630077	0.00788142	3.36761e-05	3.89366e+06	0.0589357	227.923	1.32417	0.0167984	0.000297776	2.68887e-05
464	2HP_10AM	1750	Post	2.371e+07	0.975762	98.5532	98.8258	0.627342	0.00815356	2.59924e-05	3.90259e+06	0.061888	201.105	1.36848	0.0160057	0.000294824	2.79134e-05
465	2HP_10AM	2000	Post	2.28946e+07	0.960964	89.9737	97.3499	0.631322	0.00816797	4.19105e-05	3.93046e+06	0.0694551	232.488	1.34307	0.0167429	0.000274813	2.57837e-05
466	2HP_10AM	2250	Post	2.12744e+07	0.983604	9.60962	96.2376	0.623582	0.00829454	3.19721e-06	4.83916e+06	0.0834105	286.663	1.35207	0.018543	0.000315758	2.25717e-05
467	2HP_10AM	25	Post	3.46274e+07	0.999416	36.3213	110.53	0.607893	0.0107532	3.58588e-06	8.69949e+06	0.112685	91.0883	1.58196	0.021511	0.000405951	4.10008e-05
468	2HP_10AM	250	Post	1.66182e+07	0.994255	54.9044	98.3196	0.586425	0.00767725	9.33965e-06	3.54545e+06	0.0638503	135.777	1.30822	0.0170158	0.000291078	3.285e-05
469	2HP_10AM	2500	Post	2.00694e+07	0.986962	67.3081	101.072	0.606875	0.00812469	1.49935e-05	3.38075e+06	0.0609248	146.857	1.36055	0.0153354	0.00029526	3.08402e-05
470	2HP_10AM	50	Post	2.92318e+07	0.996504	32.9172	105.043	0.610641	0.00964593	4.65337e-06	5.37461e+06	0.0952189	94.9051	1.49786	0.0157935	0.000300286	3.68362e-05
471	2HP_10AM	500	Post	1.70134e+07	0.982514	62.9438	95.4417	0.601748	0.00736341	1.45983e-05	3.10041e+06	0.051489	145.655	1.27968	0.0172296	0.000300223	2.99869e-05
472	2HP_10AM	75	Post	2.58966e+07	0.996599	24.2922	103.099	0.605648	0.00925817	3.121e-06	4.95278e+06	0.0997568	134.251	1.42809	0.0146104	0.000267242	3.24433e-05
473	2HP_10AM	750	Post	1.91182e+07	0.974706	102.542	96.6529	0.610389	0.00742578	2.05524e-05	3.43465e+06	0.0490812	155.009	1.33286	0.0174997	0.000323148	2.86969e-05
474	2HP_10AM	1	Under	5.82684e+07	0.999584	37.2618	117.379	0.621906	0.0129385	1.69694e-06	8.52341e+06	0.0306725	10.4273	1.90421	0.0172384	0.000244525	5.26133e-07
475	2HP_10AM	10	Under	3.77444e+07	0.999119	36.8003	112.353	0.601941	0.0113888	2.83421e-06	1.02184e+07	0.0774126	24.5663	1.708	0.0269136	0.000397073	1.19678e-05
476	2HP_10AM	100	Under	2.26421e+07	0.996582	26.4264	100.649	0.600462	0.00845232	4.15191e-06	4.52903e+06	0.102262	120.821	1.34865	0.015411	0.000257585	3.25801e-05
477	2HP_10AM	1000	Under	1.77497e+07	0.974088	123.661	88.7714	0.626617	0.00632328	3.92149e-05	3.50652e+06	0.0489659	200.034	1.19131	0.0186005	0.000257448	2.59747e-05
478	2HP_10AM	1250	Under	1.77436e+07	0.968565	168.781	87.9547	0.626999	0.00608081	4.01342e-05	3.43932e+06	0.0455167	206.732	1.17247	0.0184193	0.000251011	2.42586e-05
479	2HP_10AM	1500	Under	1.68325e+07	0.983002	104.438	87.3163	0.625588	0.00605843	3.28432e-05	3.41397e+06	0.0441772	197.617	1.1502	0.0187954	0.000276496	2.37348e-05
480	2HP_10AM	1750	Under	1.68287e+07	0.982944	141.332	87.3122	0.625561	0.00585407	3.2822e-05	3.59174e+06	0.041798	204.636	1.16092	0.0199557	0.00028026	2.30217e-05
481	2HP_10AM	2000	Under	1.69277e+07	0.972419	160.279	86.3943	0.627858	0.00574818	3.57557e-05	3.38667e+06	0.0391355	179.315	1.15167	0.0196697	0.000265783	2.23233e-05
482	2HP_10AM	2250	Under	1.69415e+07	0.974534	197.297	86.3765	0.628029	0.00554873	3.64461e-05	3.4738e+06	0.0376192	178.046	1.15792	0.0202914	0.000264033	2.105e-05
483	2HP_10AM	25	Under	3.17806e+07	0.993153	30.2894	106.43	0.605003	0.0100878	2.75289e-06	9.08192e+06	0.116009	70.9033	1.57187	0.0255124	0.000424754	4.10401e-05
484	2HP_10AM	250	Under	2.00391e+07	0.962424	14.2357	94.3756	0.615559	0.00760876	5.09991e-06	3.43128e+06	0.0896049	164.098	1.26384	0.014816	0.000218388	2.82829e-05
485	2HP_10AM	2500	Under	1.69368e+07	0.972122	177.568	85.6501	0.630346	0.00550352	3.66583e-05	3.34544e+06	0.0364935	164.509	1.14251	0.0198316	0.000259842	1.93381e-05
486	2HP_10AM	50	Under	3.05187e+07	0.99572	20.698	102.917	0.619833	0.00935381	2.81969e-06	5.64893e+06	0.111965	102.843	1.45874	0.0166778	0.000297945	3.60464e-05
487	2HP_10AM	500	Under	1.91684e+07	0.970597	63.5763	91.46	0.625284	0.00698031	3.67344e-05	3.32312e+06	0.0667372	198.928	1.22953	0.0160414	0.000223957	2.66264e-05
488	2HP_10AM	75	Under	2.63558e+07	0.993754	23.1654	100.285	0.610411	0.00882985	2.92639e-06	5.33396e+06	0.105207	117.543	1.40838	0.0176712	0.000304733	3.55747e-05
489	2HP_10AM	750	Under	1.86633e+07	0.986916	96.8652	90.024	0.627564	0.00655665	3.28156e-05	3.47082e+06	0.0564638	209.669	1.20529	0.017461	0.000243763	2.58114e-05
490	2HP_20AM	1	Post	4.74508e+07	0.974991	51.9103	77.8723	0.616413	0.00953466	6.64906e-07	6.90384e+06	0.0734559	7.39375	3.13964	0.0167049	0.000148694	1.0022e-07
491	2HP_20AM	10	Post	4.51164e+07	0.999921	36.6838	76.798	0.634749	0.00805907	5.96416e-07	6.22889e+06	0.076587	5.89918	2.68082	0.0155389	0.00013039	9.83277e-08
492	2HP_20AM	100	Post	2.28213e+07	0.997399	23.9633	69.8894	0.636199	0.00542888	4.87655e-07	2.93521e+06	0.100021	4.91143	2.55073	0.0150262	0.000107596	9.23156e-08
493	2HP_20AM	1000	Post	1.11925e+07	0.993779	15.3279	67.0684	0.619705	0.00414092	4.41202e-07	1.36085e+06	0.120525	3.9774	2.12589	0.0136894	8.9074e-05	1.07821e-07
494	2HP_20AM	1250	Post	9.87288e+06	0.9932	13.5407	67.1653	0.613526	0.00395058	5.01267e-07	1.25256e+06	0.112377	3.44333	1.69439	0.0139303	8.78227e-05	1.28715e-07
495	2HP_20AM	1500	Post	1.06644e+07	0.999038	16.1584	67.9601	0.613786	0.00414057	4.82388e-07	1.39761e+06	0.116489	3.9199	2.0708	0.0137941	8.99521e-05	1.04401e-07
496	2HP_20AM	1750	Post	1.01299e+07	0.996304	14.7158	66.6545	0.614954	0.00397531	4.87091e-07	1.30997e+06	0.121264	3.88594	1.93887	0.0143454	9.00122e-05	1.16206e-07
497	2HP_20AM	2000	Post	1.00487e+07	0.999604	16.237	68.0443	0.610214	0.00407782	4.68799e-07	1.35199e+06	0.101324	3.42509	1.95251	0.0138358	9.01036e-05	9.94607e-08
498	2HP_20AM	2250	Post	9.86887e+06	0.998854	15.0359	66.7657	0.611762	0.00394407	4.95231e-07	1.22787e+06	0.103624	3.30778	1.77598	0.013794	8.56856e-05	1.13387e-07
499	2HP_20AM	25	Post	3.47796e+07	0.998816	28.9404	75.0161	0.636016	0.0067745	5.8612e-07	4.79317e+06	0.0694708	4.42726	2.15426	0.0153491	0.000121	9.92848e-08
500	2HP_20AM	250	Post	1.49169e+07	0.999324	19.099	69.7478	0.621168	0.00474421	4.69139e-07	1.9429e+06	0.102127	4.14214	2.05509	0.0145966	9.90365e-05	1.03299e-07
501	2HP_20AM	2500	Post	9.87032e+06	0.99882	15.0761	66.7632	0.611934	0.00393031	5.07847e-07	1.26195e+06	0.111277	3.61316	1.81625	0.014197	8.71874e-05	1.1235e-07
502	2HP_20AM	50	Post	3.09884e+07	0.996845	27.9459	71.9672	0.644189	0.00619172	5.0931e-07	4.13484e+06	0.0955128	5.34742	2.67427	0.0156629	0.000118972	9.26022e-08
503	2HP_20AM	500	Post	1.13723e+07	0.999601	14.8679	68.3352	0.61821	0.00422237	5.4314e-07	1.4177e+06	0.10059	3.42006	1.63584	0.0140662	9.09522e-05	1.33372e-07
504	2HP_20AM	75	Post	2.38032e+07	0.998427	25.9868	71.9375	0.63182	0.00566727	5.19511e-07	3.23425e+06	0.0802822	4.29919	2.19208	0.0149844	0.000110507	9.04844e-08
505	2HP_20AM	750	Post	1.14295e+07	0.997339	16.2904	67.8428	0.617323	0.00422728	4.71735e-07	1.46088e+06	0.116668	4.0001	2.13219	0.0139725	9.13369e-05	1.03188e-07
506	2HP_20AM	1	Under	5.44177e+07	0.989491	46.8408	77.5592	0.640674	0.00884595	6.71144e-07	7.59429e+06	0.0595532	5.99953	2.59186	0.0164021	0.000151201	9.06912e-08
507	2HP_20AM	10	Under	4.15738e+07	0.993159	34.6187	76.0465	0.632705	0.00750932	5.76905e-07	6.35598e+06	0.134436	10.5012	3.89584	0.0185491	0.000143601	1.55459e-07
508	2HP_20AM	100	Under	1.87712e+07	0.987387	20.1124	67.4042	0.627482	0.00472992	5.08959e-07	2.50498e+06	0.112	4.73489	2.1773	0.0156095	9.39263e-05	1.15996e-07
509	2HP_20AM	1000	Under	1.03263e+07	0.997344	8.43968	60.4279	0.632892	0.00314638	4.88389e-07	1.36875e+06	0.197461	4.80403	1.75588	0.015795	7.88687e-05	2.48987e-07
510	2HP_20AM	1250	Under	1.01911e+07	0.989008	7.87065	59.2833	0.635565	0.00305462	4.53125e-07	1.39246e+06	0.203738	5.0462	1.69721	0.0160391	8.06437e-05	3.78581e-07
511	2HP_20AM	1500	Under	1.03587e+07	0.98888	7.42712	58.6252	0.640711	0.00298611	4.88305e-07	1.36554e+06	0.199368	4.38767	1.57532	0.0152915	7.69984e-05	3.05014e-07
512	2HP_20AM	1750	Under	1.0569e+07	0.991885	6.95173	58.3942	0.644743	0.00294162	4.89445e-07	1.36614e+06	0.194943	3.91088	1.56451	0.0150845	7.52769e-05	2.73973e-07
513	2HP_20AM	2000	Under	1.04896e+07	0.991769	6.61849	57.8565	0.645557	0.00288877	4.70877e-07	1.47702e+06	0.200932	4.53401	1.62652	0.0160163	8.1143e-05	3.68527e-07
514	2HP_20AM	2250	Under	1.1037e+07	0.980298	6.47725	57.1958	0.652518	0.00285118	4.46729e-07	1.50677e+06	0.204576	4.25504	1.42561	0.016228	8.30505e-05	4.03516e-07
515	2HP_20AM	25	Under	3.26991e+07	0.990122	28.1381	73.4395	0.637276	0.0062673	5.93709e-07	4.6682e+06	0.0948023	5.7054	2.55468	0.0169768	0.00012005	1.13217e-07
516	2HP_20AM	250	Under	1.29561e+07	0.998539	15.1877	64.7622	0.621509	0.00390214	5.37203e-07	1.75643e+06	0.164488	5.68669	2.30371	0.0160464	8.68517e-05	1.65498e-07
517	2HP_20AM	2500	Under	1.15248e+07	0.999178	6.05473	56.8763	0.657508	0.0028154	4.66609e-07	1.55627e+06	0.204546	4.75809	1.48931	0.0163069	8.44673e-05	5.1274e-07
518	2HP_20AM	50	Under	2.39059e+07	0.998594	23.6551	70.0302	0.629783	0.00539447	5.55264e-07	3.61814e+06	0.0960113	4.86944	2.16642	0.0167534	0.00011036	1.16026e-07
519	2HP_20AM	500	Under	1.01438e+07	0.995083	11.4938	62.1365	0.61546	0.00342101	4.85694e-07	1.44711e+06	0.168269	4.70539	1.8301	0.0158772	7.92966e-05	1.94752e-07
520	2HP_20AM	75	Under	1.99663e+07	0.997912	22.4298	68.9264	0.623935	0.00494309	5.6851e-07	2.88544e+06	0.0921479	4.21893	1.99756	0.0157217	9.90322e-05	1.1031e-07
521	2HP_20AM	750	Under	9.81713e+06	0.99596	9.89741	61.1742	0.620939	0.00323562	4.96491e-07	1.33098e+06	0.184447	4.63723	1.74103	0.014967	7.58406e-05	2.18856e-07
522	2LP_0AM	10	Post	1.62158e+07	0.969325	1831.7	388.257	0.463588	0.0227654	1.21021e-06	3.48841e+06	0.0604462	226.958	179.873	0.0255872	0.000588133	1.32284e-07
523	2LP_0AM	100	Post	1.19745e+07	0.968051	2064.29	371.513	0.414655	0.0259102	1.73403e-06	3.15727e+06	0.0557237	217.062	139.026	0.027361	0.000658848	1.29712e-07
524	2LP_0AM	1000	Post	1.10484e+07	0.950582	2095.38	276.087	0.401061	0.0273634	2.46207e-06	2.98226e+06	0.0501562	200.502	95.3306	0.0280859	0.000717953	1.63809e-07
525	2LP_0AM	1250	Post	1.19352e+07	0.951783	2115.59	260.235	0.409764	0.0274894	2.4426e-06	3.01419e+06	0.0491895	199.566	92.4087	0.0268677	0.000722169	1.67452e-07
526	2LP_0AM	1400	Post	1.04657e+07	0.948767	2123.05	277.23	0.396315	0.0275089	2.50084e-06	2.95885e+06	0.0526377	213.288	96.5843	0.0280276	0.000742878	1.71587e-07
527	2LP_0AM	1500	Post	1.06629e+07	0.976215	2042.18	347.019	0.39777	0.0282989	2.5733e-06	2.89737e+06	0.0498166	204.369	91.9023	0.0275646	0.000745299	1.74208e-07
528	2LP_0AM	1600	Post	1.16579e+07	0.964161	2085.45	275.289	0.40791	0.0277372	2.40312e-06	3.18352e+06	0.0513625	211.208	98.8382	0.0292461	0.000766076	1.71756e-07
529	2LP_0AM	1750	Post	1.00388e+07	0.934338	2235.38	241.317	0.390658	0.0277571	2.54916e-06	2.94303e+06	0.0509129	210.127	96.7298	0.0280293	0.000758435	1.71062e-07
530	2LP_0AM	1850	Post	1.08751e+07	0.959023	2154.23	254.496	0.401452	0.0276006	2.44392e-06	3.1706e+06	0.0518486	214.18	100.971	0.0289138	0.000778358	1.70642e-07
531	2LP_0AM	200	Post	1.21456e+07	0.992311	1952.26	403.367	0.41324	0.0266636	2.04925e-06	2.88875e+06	0.0510235	193.843	112.781	0.0267979	0.000647861	1.39384e-07
532	2LP_0AM	2000	Post	1.08913e+07	0.955403	2143.95	301.166	0.399395	0.028317	2.55171e-06	2.88508e+06	0.0506381	210.044	94.4652	0.0274131	0.000748818	1.77698e-07
533	2LP_0AM	2251	Post	1.04504e+07	0.943431	2213.25	241.882	0.395971	0.0278192	2.45883e-06	3.00981e+06	0.0495423	208.173	96.759	0.0278149	0.000754198	1.68147e-07
534	2LP_0AM	25	Post	1.35904e+07	0.944176	2095.98	292.395	0.436275	0.0239629	1.27618e-06	3.4527e+06	0.0589091	231.972	172.373	0.0265411	0.000622787	1.27552e-07
535	2LP_0AM	250	Post	1.18105e+07	0.984419	1984.75	362.622	0.408444	0.0267451	2.12539e-06	2.96344e+06	0.0501753	192.473	105.472	0.0272218	0.000668516	1.43515e-07
536	2LP_0AM	2500	Post	1.02742e+07	0.937098	2227.64	230.81	0.394609	0.0276719	2.47715e-06	3.06839e+06	0.0519884	217.769	102.078	0.0281352	0.000771473	1.69462e-07
537	2LP_0AM	400	Post	1.11997e+07	0.958837	2113.08	261.618	0.402142	0.026845	2.25876e-06	2.94705e+06	0.0501771	199.589	104.028	0.0273588	0.000692756	1.48038e-07
538	2LP_0AM	50	Post	1.33538e+07	0.956227	2078.41	341.443	0.430141	0.025003	1.4757e-06	3.29457e+06	0.0591067	230.733	159.675	0.0270389	0.000642511	1.29392e-07
539	2LP_0AM	500	Post	1.11856e+07	0.957636	2100.5	289.143	0.40277	0.0269056	2.32214e-06	2.93882e+06	0.05246	204.901	106.672	0.0272913	0.000693223	1.51084e-07
540	2LP_0AM	600	Post	1.03234e+07	0.954175	2086.94	313.529	0.39356	0.027257	2.41679e-06	2.97647e+06	0.0511023	202.98	98.7391	0.027914	0.000725121	1.6408e-07
541	2LP_0AM	75	Post	1.38683e+07	0.980197	2041.18	378.401	0.431731	0.0257351	1.64091e-06	3.03043e+06	0.0559858	217.926	148.188	0.0254827	0.000628599	1.21167e-07
542	2LP_0AM	750	Post	1.1047e+07	0.959031	2113.46	274.634	0.401057	0.0275192	2.3947e-06	2.97529e+06	0.051188	212.877	98.9563	0.0280675	0.000729346	1.65284e-07
543	2LP_0AM	10	Under	1.18592e+07	0.999718	1486.9	484.528	0.428956	0.0201138	1.22803e-06	2.72635e+06	0.0620088	204.301	166.071	0.0256952	0.000435177	1.40996e-07
544	2LP_0AM	100	Under	8.66307e+06	0.968882	1731.52	316.222	0.376331	0.0217819	1.68674e-06	2.37645e+06	0.0522781	169.601	117.194	0.0277838	0.00043707	1.25824e-07
545	2LP_0AM	1000	Under	7.11023e+06	0.921364	1039.87	219.961	0.350646	0.0182199	3.23132e-06	2.38233e+06	0.0624389	126.607	47.9724	0.0323847	0.000360406	3.06358e-07
546	2LP_0AM	1250	Under	7.84982e+06	0.89774	913.477	213.964	0.361363	0.0170409	3.43902e-06	2.52321e+06	0.0698942	129.185	46.6562	0.0339855	0.000340533	3.8685e-07
547	2LP_0AM	1400	Under	7.21883e+06	0.869717	884.515	196.611	0.353909	0.0162722	3.58344e-06	2.55522e+06	0.06903	120.309	41.8269	0.0345226	0.000319519	4.45113e-07
548	2LP_0AM	1500	Under	7.2128e+06	0.87145	835.476	202.116	0.354689	0.0158329	3.64366e-06	2.56457e+06	0.0736644	122.762	43.5787	0.0347602	0.00030926	4.64424e-07
549	2LP_0AM	1600	Under	7.22139e+06	0.867954	797.886	200.249	0.355072	0.015409	3.63174e-06	2.51877e+06	0.0760849	121.278	43.0489	0.0336714	0.000298852	4.74056e-07
550	2LP_0AM	1750	Under	8.3632e+06	0.837896	760.921	184.342	0.371695	0.0149141	3.61976e-06	2.60185e+06	0.0858648	134.527	47.7058	0.0347482	0.000292588	5.73978e-07
551	2LP_0AM	1850	Under	8.36495e+06	0.837725	722.091	188.077	0.371983	0.0145688	3.62284e-06	2.80072e+06	0.0878884	135.268	44.7757	0.0363157	0.000297776	6.39582e-07
552	2LP_0AM	200	Under	7.83778e+06	0.960436	1653.13	286.92	0.362658	0.0218388	2.03759e-06	2.2043e+06	0.0460496	137.916	84.0695	0.0273667	0.000420507	1.32258e-07
553	2LP_0AM	2000	Under	8.38772e+06	0.835631	670.632	192.984	0.374126	0.0140256	3.68827e-06	3.05566e+06	0.10099	163.113	53.221	0.0421539	0.000316333	8.20567e-07
554	2LP_0AM	2251	Under	8.49597e+06	0.817132	625.436	186.817	0.377502	0.0132014	3.71277e-06	2.99549e+06	0.112735	175.238	55.5813	0.0395723	0.00028674	9.87157e-07
555	2LP_0AM	25	Under	1.15989e+07	0.991767	1618.11	402.873	0.41838	0.0210335	1.29033e-06	2.70016e+06	0.0555511	186.803	147.475	0.0263134	0.000431618	1.2812e-07
556	2LP_0AM	250	Under	7.55452e+06	0.975016	1597.04	279.383	0.358341	0.0217563	2.18619e-06	2.19589e+06	0.0481537	139.827	82.1316	0.0281839	0.000422456	1.38809e-07
557	2LP_0AM	2500	Under	8.72144e+06	0.764593	608.078	166.949	0.382637	0.0123599	3.7178e-06	3.7137e+06	0.147036	259.325	64.2724	0.0546104	0.000352769	2.12063e-06
558	2LP_0AM	400	Under	8.62834e+06	0.971727	1422.52	264.867	0.369785	0.0214174	2.44988e-06	2.17285e+06	0.0487134	130.745	64.6139	0.0289713	0.000404729	1.61113e-07
559	2LP_0AM	50	Under	9.26866e+06	0.977675	1672.18	394.273	0.389358	0.0213377	1.50569e-06	2.39708e+06	0.0519163	170.211	127.224	0.0255547	0.000419762	1.24664e-07
560	2LP_0AM	500	Under	7.48297e+06	0.964395	1371.06	257.464	0.354837	0.0207752	2.70109e-06	2.18864e+06	0.0488765	125.322	59.1724	0.0297432	0.000402149	1.79146e-07
561	2LP_0AM	600	Under	7.20278e+06	0.941357	1305.17	238.849	0.35037	0.0202571	2.84297e-06	2.12319e+06	0.0492461	118.537	53.4068	0.0291585	0.000379045	1.99606e-07
562	2LP_0AM	75	Under	9.2048e+06	0.969146	1703.83	350.915	0.3848	0.0216605	1.59739e-06	2.40644e+06	0.0522807	167.732	118.856	0.0269304	0.000430085	1.23552e-07
563	2LP_0AM	750	Under	7.7169e+06	0.938001	1185.17	224.634	0.358968	0.01956	2.96622e-06	2.3132e+06	0.0572864	130.388	54.002	0.0318544	0.000388043	2.47392e-07
564	2LP_10AM	1	Post	3.81845e+07	0.999911	57.2074	108.487	0.571837	0.0121746	1.38912e-06	5.61433e+06	0.0154437	7.13141	1.85458	0.016259	0.000167117	2.00785e-07
565	2LP_10AM	10	Post	4.48561e+07	0.999753	39.7569	104.032	0.605139	0.0105924	1.27386e-06	6.551e+06	0.0255012	6.17204	1.79907	0.0160507	0.000163205	2.3001e-07
566	2LP_10AM	100	Post	2.71765e+07	0.997248	22.1661	91.6775	0.623993	0.00717863	1.16049e-06	3.86652e+06	0.0446352	5.29311	1.51014	0.0158011	0.000151338	3.26227e-07
567	2LP_10AM	1000	Post	1.4868e+07	0.999844	11.5284	84.3705	0.619185	0.00537572	1.38413e-06	4.38305e+06	0.159415	182.509	1.49992	0.0282605	0.000362521	4.19263e-05
568	2LP_10AM	1250	Post	1.37462e+07	0.996052	10.1021	83.499	0.617416	0.00521479	1.58514e-06	4.60702e+06	0.145035	198.499	1.2444	0.0291242	0.000316652	2.75052e-05
569	2LP_10AM	1500	Post	1.36799e+07	0.9946	9.50328	83.1505	0.61867	0.00512984	1.74625e-06	4.10564e+06	0.125395	190.414	1.14922	0.0233139	0.000228419	2.42543e-05
570	2LP_10AM	1750	Post	1.36707e+07	0.988839	9.17516	83.5939	0.616698	0.00520208	1.45927e-06	4.79444e+06	0.138726	210.894	1.20951	0.0313241	0.000339882	2.83754e-05
571	2LP_10AM	2000	Post	1.40323e+07	0.994472	9.32035	84.3566	0.616713	0.0052707	1.2867e-06	5.05827e+06	0.143876	199.878	1.27809	0.0305547	0.000311154	3.15602e-05
572	2LP_10AM	2250	Post	1.50184e+07	0.990534	10.9089	85.3141	0.620337	0.00540854	1.47026e-06	4.44911e+06	0.148842	200.943	1.41019	0.0311167	0.000414075	4.58815e-05
573	2LP_10AM	25	Post	4.06366e+07	0.999408	31.461	98.7516	0.622312	0.00908499	1.29438e-06	5.81578e+06	0.028431	5.7774	1.62137	0.0161429	0.00016063	2.67573e-07
574	2LP_10AM	250	Post	1.79117e+07	0.996025	16.6835	86.825	0.614088	0.00600319	1.40518e-06	2.87543e+06	0.0780992	6.74267	1.3056	0.0168116	0.000153889	8.43774e-07
575	2LP_10AM	2500	Post	1.69935e+07	0.995947	10.2581	85.6439	0.629165	0.00558203	1.20035e-06	4.0873e+06	0.156381	197.035	1.41802	0.0284146	0.000391536	4.57932e-05
576	2LP_10AM	50	Post	3.10118e+07	0.997152	27.0147	95.1245	0.618	0.00792801	1.29802e-06	4.82143e+06	0.0377841	5.68202	1.53738	0.0164023	0.000158939	3.21477e-07
577	2LP_10AM	500	Post	1.4864e+07	0.999999	11.2027	84.2071	0.615425	0.00545772	1.53314e-06	4.21152e+06	0.146035	139.407	1.31956	0.0269029	0.000308588	4.12226e-05
578	2LP_10AM	75	Post	2.77943e+07	0.998018	23.0988	92.9597	0.620246	0.00733377	1.35815e-06	4.06157e+06	0.033958	5.37129	1.43932	0.0160485	0.000150512	3.39007e-07
579	2LP_10AM	750	Post	1.48663e+07	0.999807	11.3668	84.3743	0.617513	0.00542058	1.42305e-06	4.69083e+06	0.143435	236.887	1.41411	0.0334507	0.000490257	3.82759e-05
580	2LP_10AM	1	Under	4.8475e+07	0.99964	55.5691	104.43	0.601962	0.01118	1.27266e-06	7.53501e+06	0.0171372	6.17115	1.86388	0.0166133	0.000173153	1.63445e-07
581	2LP_10AM	10	Under	4.22907e+07	0.999782	40.9486	101.557	0.605081	0.00967557	1.63109e-06	6.56774e+06	0.0213316	6.53485	1.61481	0.017355	0.000156195	2.68211e-07
582	2LP_10AM	100	Under	2.54107e+07	0.998195	21.0913	88.3577	0.622219	0.00653099	1.37826e-06	3.75293e+06	0.0408963	5.30199	1.34395	0.0166111	0.000136191	3.76963e-07
583	2LP_10AM	1000	Under	1.45016e+07	0.999145	9.05876	76.9204	0.628718	0.00452171	1.37858e-06	4.69055e+06	0.159057	161.14	1.19635	0.0316358	0.000325924	3.39429e-05
584	2LP_10AM	1250	Under	1.40937e+07	0.999506	8.65679	76.3329	0.62868	0.00443369	1.46716e-06	5.12282e+06	0.144287	180.273	1.14314	0.0330772	0.000358068	2.45015e-05
585	2LP_10AM	1500	Under	1.40883e+07	0.998034	8.41682	75.7547	0.630629	0.00435376	1.31133e-06	5.47173e+06	0.146815	178.159	1.14906	0.0319181	0.00030165	2.57126e-05
586	2LP_10AM	1750	Under	1.40921e+07	0.998797	8.34006	75.7398	0.632174	0.00429862	1.31243e-06	5.76182e+06	0.137048	194.888	1.08178	0.0355606	0.000344619	2.24333e-05
587	2LP_10AM	2000	Under	1.41015e+07	0.999316	7.59221	75.2485	0.63491	0.0042716	1.36495e-06	5.7311e+06	0.126523	193.197	1.08561	0.0329326	0.00032412	1.97635e-05
588	2LP_10AM	2250	Under	1.40986e+07	0.999457	7.92244	75.2737	0.635136	0.00422209	1.38698e-06	6.35991e+06	0.115431	200.116	1.02838	0.032862	0.000283575	1.8314e-05
589	2LP_10AM	25	Under	3.67846e+07	0.999318	30.6689	95.7648	0.616411	0.00836632	1.32111e-06	5.67114e+06	0.0284045	5.62013	1.52716	0.0168184	0.000149863	2.81784e-07
590	2LP_10AM	250	Under	1.79507e+07	0.99608	17.7084	82.3048	0.615616	0.00546467	1.47632e-06	3.06011e+06	0.123622	15.0255	1.27324	0.0189687	0.000161719	4.19061e-06
591	2LP_10AM	2500	Under	1.40951e+07	0.999623	7.97206	75.4859	0.63572	0.00419398	1.48806e-06	6.65224e+06	0.119837	195.132	1.0559	0.0341432	0.000286564	2.00342e-05
592	2LP_10AM	50	Under	3.24976e+07	0.99895	26.2638	91.358	0.625993	0.00740407	1.37636e-06	4.78808e+06	0.0339471	5.59128	1.43776	0.016987	0.00014679	3.32791e-07
593	2LP_10AM	500	Under	1.59357e+07	0.998778	12.821	78.5168	0.623772	0.00490983	1.37293e-06	3.43555e+06	0.160087	115.36	1.27341	0.0260612	0.000275749	4.2973e-05
594	2LP_10AM	75	Under	2.63538e+07	0.99834	24.4924	88.984	0.615905	0.00680501	1.36967e-06	4.188e+06	0.0364398	5.41899	1.38702	0.0167498	0.000141188	3.5838e-07
595	2LP_10AM	750	Under	1.47714e+07	0.995206	9.76204	77.8286	0.625202	0.00465278	1.22349e-06	4.4428e+06	0.154681	140.142	1.2897	0.0327738	0.000345297	4.56583e-05
596	2LP_20AM	1	Post	2.74558e+07	0.996211	42.0861	65.2418	0.590334	0.00668384	9.28928e-07	4.26961e+06	0.0306333	3.865	1.40763	0.0168106	9.52723e-05	1.06643e-07
597	2LP_20AM	10	Post	3.23449e+07	0.997005	31.3412	64.3616	0.610493	0.00623471	9.31367e-07	4.97318e+06	0.0328945	3.52718	1.25096	0.0168848	9.26452e-05	1.37562e-07
598	2LP_20AM	100	Post	1.92991e+07	0.998046	19.3973	58.3267	0.625699	0.00416322	8.65997e-07	2.91233e+06	0.043452	2.71784	1.05594	0.0165439	7.89887e-05	1.52606e-07
599	2LP_20AM	1000	Post	9.32135e+06	0.997289	11.8276	55.6358	0.615036	0.00312689	7.8913e-07	1.38791e+06	0.0886723	2.82356	1.03076	0.0159333	7.47328e-05	2.33053e-07
600	2LP_20AM	1250	Post	8.5144e+06	0.999434	10.4014	53.9343	0.617005	0.002942	7.83732e-07	1.29145e+06	0.170505	5.67104	1.14569	0.0181174	8.27141e-05	6.91005e-07
601	2LP_20AM	1500	Post	9.61487e+06	0.997658	11.2116	55.6196	0.62075	0.00313582	7.49015e-07	1.33792e+06	0.0979915	3.11919	1.06265	0.0159974	7.54504e-05	2.60867e-07
602	2LP_20AM	1750	Post	9.62767e+06	0.997707	11.1323	55.629	0.62046	0.00314742	7.16702e-07	1.43166e+06	0.0913026	2.85131	1.06762	0.0164981	7.75916e-05	2.2112e-07
603	2LP_20AM	2000	Post	8.78491e+06	0.999149	10.8349	54.9262	0.616716	0.00301756	7.82676e-07	1.30435e+06	0.0957133	2.90781	1.00149	0.0168329	7.55127e-05	2.72153e-07
604	2LP_20AM	2250	Post	8.13036e+06	0.998708	10.5743	54.5082	0.611655	0.00295755	8.27127e-07	1.18085e+06	0.0816061	2.55439	0.958899	0.0159048	6.89094e-05	2.43624e-07
605	2LP_20AM	25	Post	2.95975e+07	0.99306	27.6833	63.446	0.621159	0.0055576	8.87383e-07	4.53978e+06	0.0398507	3.23261	1.27413	0.0166477	9.00366e-05	1.29272e-07
606	2LP_20AM	250	Post	1.21222e+07	0.999413	14.1152	55.7741	0.618386	0.00339817	7.81597e-07	1.78231e+06	0.0666152	2.67084	1.01605	0.0162673	7.08333e-05	1.80813e-07
607	2LP_20AM	2500	Post	8.4628e+06	0.995269	10.928	54.4192	0.614244	0.00299922	8.07702e-07	1.20029e+06	0.0809281	2.66115	0.962228	0.015727	7.02324e-05	2.37821e-07
608	2LP_20AM	50	Post	2.62617e+07	0.998692	21.3217	59.9524	0.634118	0.00479998	8.02041e-07	3.72029e+06	0.041371	2.88695	1.15783	0.0163227	8.43902e-05	1.35617e-07
609	2LP_20AM	500	Post	9.4774e+06	0.999156	12.0381	54.332	0.612502	0.00311068	7.65865e-07	1.4072e+06	0.0890423	2.91405	1.02689	0.0161974	7.2198e-05	2.36139e-07
610	2LP_20AM	75	Post	2.26922e+07	0.997167	20.258	60.0326	0.631753	0.00448922	8.69271e-07	3.30774e+06	0.0389229	2.75103	1.06743	0.0164073	8.17542e-05	1.42095e-07
611	2LP_20AM	750	Post	1.08792e+07	0.995677	11.6876	54.634	0.628611	0.00321961	6.29186e-07	1.46038e+06	0.111619	3.43073	1.21392	0.0163242	7.57318e-05	2.11719e-07
612	2LP_20AM	1	Under	3.15027e+07	0.997973	36.7972	63.0543	0.611504	0.00624322	9.03367e-07	4.59521e+06	0.0283617	3.46354	1.32959	0.0168869	9.18692e-05	1.06661e-07
613	2LP_20AM	10	Under	3.0531e+07	0.991526	30.9064	63.6249	0.611624	0.0057837	8.92656e-07	4.77385e+06	0.04707	3.90135	1.33621	0.017659	8.75901e-05	1.46242e-07
614	2LP_20AM	100	Under	1.79916e+07	0.994398	17.6261	56.4683	0.630035	0.00377982	7.98601e-07	2.57829e+06	0.0551069	2.70458	1.0627	0.0168491	7.21321e-05	1.51588e-07
615	2LP_20AM	1000	Under	7.85432e+06	0.984069	6.77416	49.25	0.625236	0.00236473	7.29379e-07	1.51863e+06	0.207409	35.7489	1.03311	0.0280574	0.000121196	3.25097e-05
616	2LP_20AM	1250	Under	7.77457e+06	0.997477	6.17908	49.0881	0.629928	0.00228516	7.73642e-07	1.54771e+06	0.198196	43.6205	0.909541	0.0299211	0.0001361	4.19658e-05
617	2LP_20AM	1500	Under	7.88924e+06	0.99717	5.52223	48.5148	0.636366	0.00223919	7.70505e-07	1.51285e+06	0.183709	55.268	0.860856	0.0300253	0.000143435	4.44749e-05
618	2LP_20AM	1750	Under	7.86844e+06	0.996181	4.62226	48.1208	0.638733	0.00221266	7.29234e-07	1.63493e+06	0.152408	65.5317	0.828498	0.0326484	0.00016058	4.50109e-05
619	2LP_20AM	2000	Under	7.87942e+06	0.986162	4.9097	47.4341	0.640058	0.00216216	7.06225e-07	1.61853e+06	0.162542	55.5411	0.80849	0.0313442	0.000151333	4.52942e-05
620	2LP_20AM	2250	Under	7.91116e+06	0.987121	4.68427	47.2379	0.641971	0.00212822	7.42136e-07	1.67254e+06	0.170107	75.2517	0.809071	0.0338924	0.00017449	4.52459e-05
621	2LP_20AM	25	Under	2.68178e+07	0.989081	25.0397	61.3141	0.622142	0.00498729	8.90243e-07	4.10426e+06	0.0486446	3.28845	1.23992	0.0170114	8.26653e-05	1.42134e-07
622	2LP_20AM	250	Under	1.0616e+07	0.999792	13.2654	53.7334	0.612807	0.0030133	8.84794e-07	1.67912e+06	0.0812131	2.85722	0.952496	0.0172813	6.65928e-05	2.49252e-07
623	2LP_20AM	2500	Under	8.77378e+06	0.998241	4.07612	46.9746	0.65596	0.00214188	6.86674e-07	1.48495e+06	0.140398	53.0697	0.797797	0.0275899	0.000141078	4.53372e-05
624	2LP_20AM	50	Under	2.42014e+07	0.998865	20.1009	59.1884	0.635634	0.00439579	8.33831e-07	3.40852e+06	0.0523583	3.06066	1.16783	0.0169966	7.94523e-05	1.49142e-07
625	2LP_20AM	500	Under	9.06789e+06	0.998389	8.40187	51.5525	0.622928	0.00265849	7.27248e-07	1.57827e+06	0.20207	17.6867	1.15439	0.0239793	0.000101039	6.6547e-06
626	2LP_20AM	75	Under	2.06091e+07	0.998756	18.0093	57.9325	0.633863	0.00403233	8.13768e-07	2.91662e+06	0.0500307	2.76328	1.06437	0.0169661	7.68691e-05	1.50427e-07
627	2LP_20AM	750	Under	7.86445e+06	0.996684	7.17234	50.6549	0.619065	0.0024561	7.30984e-07	1.60556e+06	0.211317	46.1416	1.07986	0.0305639	0.00013326	3.959e-05
628	3HP_0AM	10	Post	1.83973e+07	0.974566	1645.46	359.353	0.449887	0.0211395	1.50983e-06	4.96755e+06	0.0520687	165.72	121.443	0.0304545	0.000479666	1.22237e-07
629	3HP_0AM	100	Post	1.49027e+07	0.979066	1467.16	257.05	0.411419	0.0214791	2.43015e-06	4.17675e+06	0.0461323	131.232	68.7515	0.0311489	0.000431491	1.53172e-07
630	3HP_0AM	1000	Post	1.25495e+07	0.931766	1149.36	203.249	0.394356	0.0185233	2.99998e-06	4.13968e+06	0.0538133	115.103	48.8534	0.0332195	0.000358405	2.24337e-07
631	3HP_0AM	1250	Post	1.28786e+07	0.953286	1132.55	233.68	0.397468	0.0186862	2.96475e-06	4.12249e+06	0.0520523	111.298	48.4185	0.0329694	0.000359829	2.14336e-07
632	3HP_0AM	1400	Post	1.28824e+07	0.953757	1135.65	233.61	0.3978	0.0187073	2.91701e-06	4.13678e+06	0.049718	106.785	47.1221	0.0323123	0.000354297	2.10138e-07
633	3HP_0AM	1500	Post	1.25331e+07	0.940282	1079.32	216.989	0.393024	0.0183457	3.15079e-06	4.59899e+06	0.0531079	108.171	44.5151	0.0353588	0.000375628	2.47072e-07
634	3HP_0AM	1600	Post	1.28687e+07	0.940546	1179.77	222.537	0.397662	0.018825	2.87029e-06	4.07447e+06	0.0518992	112.325	49.8667	0.0323241	0.000355456	2.00471e-07
635	3HP_0AM	1750	Post	1.44555e+07	0.958782	1148.2	236.559	0.410366	0.0187737	2.87738e-06	4.31293e+06	0.0492138	105.851	47.8271	0.0318746	0.000361802	2.06392e-07
636	3HP_0AM	1850	Post	1.26966e+07	0.916368	1110.01	199.109	0.396002	0.0182063	3.16094e-06	4.56389e+06	0.0575508	118.218	47.9728	0.0354626	0.000376396	2.58731e-07
637	3HP_0AM	200	Post	1.44509e+07	0.957339	1294.71	223.093	0.406028	0.0204153	2.81189e-06	4.10313e+06	0.0474386	115.083	52.4203	0.0314873	0.000392188	1.95259e-07
638	3HP_0AM	2000	Post	1.43091e+07	0.922514	1166.21	198.624	0.409086	0.018546	2.83048e-06	4.49962e+06	0.053378	112.592	49.7337	0.0327789	0.000365681	2.17139e-07
639	3HP_0AM	2250	Post	1.42138e+07	0.959411	1072.36	231.171	0.410519	0.0183357	2.83995e-06	4.51128e+06	0.0562761	119.336	52.4527	0.0340095	0.000378151	2.17822e-07
640	3HP_0AM	25	Post	1.61418e+07	0.969736	1688.21	286.572	0.427063	0.0215466	1.80546e-06	4.76143e+06	0.0476324	149.511	102.215	0.0308183	0.000470124	1.26065e-07
641	3HP_0AM	250	Post	1.45078e+07	0.95845	1254.35	234.605	0.408569	0.0197549	2.79177e-06	3.93381e+06	0.0474925	112.339	50.1	0.0314483	0.000372764	1.90309e-07
642	3HP_0AM	2500	Post	1.30967e+07	0.933815	1192.8	232.456	0.400601	0.0185426	2.78976e-06	4.28977e+06	0.0543575	116.073	54.7207	0.0324864	0.000364781	1.97141e-07
643	3HP_0AM	400	Post	1.25225e+07	0.93473	1203.42	207.959	0.392856	0.0189483	3.05209e-06	4.19879e+06	0.0495031	110.458	46.2675	0.0323818	0.000364171	2.17677e-07
644	3HP_0AM	50	Post	1.46226e+07	0.974831	1598.29	278.9	0.412415	0.021508	2.07817e-06	4.3957e+06	0.0440182	129.587	77.4871	0.0305902	0.000439482	1.30998e-07
645	3HP_0AM	500	Post	1.32171e+07	0.953904	1105.61	223.662	0.397636	0.0189867	3.14434e-06	4.10469e+06	0.0521011	111.528	45.3009	0.0327839	0.000360808	2.4322e-07
646	3HP_0AM	600	Post	1.3465e+07	0.95512	1100.44	223.782	0.400697	0.0189425	3.09172e-06	4.22987e+06	0.0507259	108.133	44.1302	0.0329885	0.000355671	2.31229e-07
647	3HP_0AM	75	Post	1.48219e+07	0.975052	1514.87	281.456	0.413244	0.0214592	2.27437e-06	4.2156e+06	0.0428151	120.74	66.8911	0.0315739	0.000433847	1.40839e-07
648	3HP_0AM	750	Post	1.34561e+07	0.955002	1141.03	225.761	0.400833	0.0189441	2.93399e-06	4.25849e+06	0.0500931	106.957	46.4919	0.0326614	0.0003547	2.10693e-07
649	3HP_0AM	10	Under	1.2872e+07	0.970685	1475.55	308.752	0.409107	0.018313	1.51569e-06	4.27859e+06	0.0564169	161.614	119.427	0.0327459	0.000375436	1.28356e-07
650	3HP_0AM	100	Under	1.09054e+07	0.970887	1187.84	229.462	0.375375	0.0178659	2.62813e-06	3.54523e+06	0.04681	101.211	51.7274	0.0334686	0.000307113	1.64355e-07
651	3HP_0AM	1000	Under	1.54818e+07	0.759645	301.921	138.866	0.453962	0.00768127	2.63814e-06	6.79306e+06	0.137536	109.38	41.171	0.0529319	0.000168363	1.06001e-06
652	3HP_0AM	1250	Under	1.69597e+07	0.758553	240.424	134.754	0.484164	0.00644439	2.32389e-06	7.13703e+06	0.131945	79.7742	37.0856	0.0480747	0.000141046	6.96658e-07
653	3HP_0AM	1400	Under	1.93665e+07	0.787299	205.493	137.624	0.50962	0.00591195	2.161e-06	6.75038e+06	0.143018	75.8175	37.7393	0.0431569	0.000125218	6.33452e-07
654	3HP_0AM	1500	Under	1.85585e+07	0.82358	183.085	139.324	0.513762	0.00556596	1.96578e-06	7.55531e+06	0.151103	74.836	36.8442	0.0463639	0.000128978	5.93394e-07
655	3HP_0AM	1600	Under	1.91676e+07	0.827056	176.863	135.556	0.522704	0.00527839	1.91939e-06	6.70336e+06	0.148537	69.1689	36.3522	0.0419603	0.000117486	5.26525e-07
656	3HP_0AM	1750	Under	1.89942e+07	0.798377	168.773	126.507	0.533042	0.00487174	1.70853e-06	6.9867e+06	0.156506	64.1733	35.8573	0.0423958	0.000116164	4.9131e-07
657	3HP_0AM	1850	Under	2.00379e+07	0.821544	153.955	129.851	0.545573	0.00466459	1.69339e-06	6.51142e+06	0.150016	63.0307	35.9502	0.0427547	0.000109928	5.78776e-07
658	3HP_0AM	200	Under	1.05701e+07	0.936996	932.363	206.84	0.369771	0.0161395	3.21234e-06	3.6845e+06	0.0546064	96.5231	39.593	0.0364772	0.000274317	2.50053e-07
659	3HP_0AM	2000	Under	2.18491e+07	0.858653	134.356	131.998	0.564961	0.00438923	1.63909e-06	6.74152e+06	0.157357	58.3065	33.881	0.0433558	0.000108376	4.91572e-07
660	3HP_0AM	2250	Under	2.22664e+07	0.893606	113.708	133.048	0.58327	0.00397027	1.67537e-06	6.54421e+06	0.163805	56.7104	35.421	0.043259	0.000101671	5.3006e-07
661	3HP_0AM	25	Under	1.21466e+07	0.961688	1478.31	251.903	0.394753	0.0185236	1.82675e-06	3.64387e+06	0.0463667	121.707	83.8512	0.030888	0.000335442	1.241e-07
662	3HP_0AM	250	Under	1.08587e+07	0.92096	844.754	194.362	0.373731	0.015395	3.37823e-06	3.87741e+06	0.0584428	93.5976	37.3016	0.0376555	0.00026205	3.03315e-07
663	3HP_0AM	2500	Under	1.58196e+07	0.847336	112.113	125.96	0.556192	0.00355191	1.57004e-06	7.44141e+07	0.221084	194.613	21.5726	0.308826	26.3355	3.28784e-05
664	3HP_0AM	400	Under	1.11606e+07	0.88684	617.091	192.823	0.381432	0.0131161	3.76499e-06	4.45793e+06	0.0771371	100.165	34.6013	0.0425057	0.000236879	4.98391e-07
665	3HP_0AM	50	Under	1.28494e+07	0.979168	1330.19	254.665	0.396229	0.0185619	2.15943e-06	3.53226e+06	0.0457771	111.59	67.5912	0.0322114	0.00031833	1.34217e-07
666	3HP_0AM	500	Under	1.12945e+07	0.840006	540.054	169.235	0.386311	0.0118819	3.6922e-06	4.91294e+06	0.0911655	103.816	35.8384	0.0459628	0.000218912	6.36961e-07
667	3HP_0AM	600	Under	1.29123e+07	0.834957	457.766	168.061	0.405826	0.0107951	3.58149e-06	5.19806e+06	0.120717	128.468	44.1344	0.0462968	0.000218257	9.13431e-07
668	3HP_0AM	75	Under	1.16205e+07	0.9673	1273.21	234.335	0.382989	0.0181881	2.43931e-06	3.75705e+06	0.0429079	100.96	53.2821	0.0349966	0.000326547	1.53863e-07
669	3HP_0AM	750	Under	1.35189e+07	0.782935	389.681	152.574	0.421839	0.00941931	3.30516e-06	5.82458e+06	0.141097	151.172	48.2963	0.0541103	0.000202354	1.40788e-06
670	3HP_10AM	1	Post	1.93756e+07	0.677741	336.863	-17.5876	0.436586	0.0254025	5.54699e-07	3.28696e+06	0.0916887	66.8604	31.7387	0.018212	0.000328244	8.9687e-08
671	3HP_10AM	10	Post	2.96117e+07	0.586498	301.973	-73.3111	0.488505	0.0199776	1.65554e-07	4.59016e+06	0.0758888	44.1127	33.1764	0.0160739	0.000218519	5.35724e-08
672	3HP_10AM	100	Post	3.65179e+07	0.837248	117.402	44.791	0.567862	0.0134754	2.23414e-07	4.93549e+06	0.140134	47.7458	39.7347	0.0146945	0.000184499	7.24098e-08
673	3HP_10AM	1000	Post	3.05038e+07	0.790944	140.568	7.1315	0.588712	0.0110214	1.14461e-07	3.91683e+06	0.11127	46.2971	42.3974	0.0134813	0.000160427	5.53512e-08
674	3HP_10AM	1250	Post	3.11807e+07	0.827937	101.564	45.8222	0.588033	0.0111526	1.89051e-07	4.0898e+06	0.143274	41.7784	35.7545	0.0143227	0.000173402	7.35372e-08
675	3HP_10AM	1500	Post	3.08478e+07	0.811205	127.126	17.1536	0.587142	0.0112391	1.27163e-07	3.86677e+06	0.120495	44.6351	40.192	0.0135166	0.000163822	5.85333e-08
676	3HP_10AM	1750	Post	3.26583e+07	0.755839	167.136	-17.4016	0.585375	0.0116112	9.30639e-08	4.28283e+06	0.103622	44.2211	40.433	0.0135813	0.000165856	4.86768e-08
677	3HP_10AM	2000	Post	3.14124e+07	0.850625	113.652	33.2463	0.58483	0.0115277	1.60824e-07	4.09784e+06	0.117159	43.5693	38.4727	0.0140329	0.000173681	5.82933e-08
678	3HP_10AM	2250	Post	2.99899e+07	0.787877	118.096	35.3834	0.576921	0.0116173	1.71035e-07	4.07328e+06	0.141604	46.8116	40.8158	0.0139999	0.000175537	7.34403e-08
679	3HP_10AM	25	Post	3.52694e+07	0.590146	287.602	-88.29	0.523723	0.017201	8.99277e-08	5.41714e+06	0.0914688	46.6666	38.003	0.0158061	0.00020306	4.96545e-08
680	3HP_10AM	250	Post	3.12787e+07	0.78588	142.93	9.36435	0.580921	0.0115715	1.23511e-07	4.09818e+06	0.112168	47.8457	42.8776	0.0138626	0.000168699	5.41449e-08
681	3HP_10AM	2500	Post	3.40069e+07	0.811566	140.792	11.6825	0.587513	0.0118145	1.32312e-07	4.26313e+06	0.111721	46.7026	42.4655	0.0139144	0.000173651	5.59868e-08
682	3HP_10AM	50	Post	3.98491e+07	0.70275	212.875	-40.732	0.555515	0.0150979	1.05809e-07	5.52936e+06	0.0911486	46.0201	40.6651	0.0149263	0.000184629	4.70079e-08
683	3HP_10AM	500	Post	2.96376e+07	0.833552	121.751	25.2237	0.586779	0.0109852	1.4086e-07	3.62093e+06	0.113626	47.6698	43.5672	0.0131785	0.00015818	5.66301e-08
684	3HP_10AM	75	Post	3.75705e+07	0.721347	202.476	-36.2085	0.560709	0.0141505	9.98051e-08	5.2221e+06	0.0922033	45.3615	40.1582	0.0143618	0.000176274	4.54328e-08
685	3HP_10AM	750	Post	2.99508e+07	0.856424	102.268	44.1988	0.587137	0.0109366	1.79488e-07	3.84769e+06	0.133083	46.4012	41.7304	0.0140887	0.000167852	6.95126e-08
686	3HP_10AM	1	Under	2.08886e+07	0.675541	315.772	-7.37596	0.448378	0.0238605	5.28111e-07	3.45563e+06	0.0952369	63.4756	31.8593	0.0172457	0.0002973	9.37104e-08
687	3HP_10AM	10	Under	2.63765e+07	0.506967	340.022	-99.8342	0.481002	0.0184775	1.26959e-07	4.2547e+06	0.0716375	42.9814	33.8506	0.0156783	0.000198089	6.17934e-08
688	3HP_10AM	100	Under	3.26952e+07	0.748107	160.138	-2.66741	0.569237	0.0122278	1.17875e-07	4.50017e+06	0.111855	47.0778	42.0699	0.0148749	0.000169426	5.66937e-08
689	3HP_10AM	1000	Under	1.49915e+07	0.943815	71.2487	49.0519	0.58358	0.00716762	1.52297e-07	1.93144e+06	0.124888	45.5585	43.3944	0.0130695	0.000121246	6.11888e-08
690	3HP_10AM	1250	Under	1.49362e+07	0.951611	68.6024	47.7136	0.589674	0.00688647	1.37763e-07	1.83617e+06	0.119316	47.2565	45.5585	0.0128911	0.000113523	5.82729e-08
691	3HP_10AM	1500	Under	1.49092e+07	0.967709	63.6624	49.5281	0.595239	0.00663693	1.40695e-07	1.74267e+06	0.111778	40.0708	39.33	0.0124774	0.000108867	5.7237e-08
692	3HP_10AM	1750	Under	1.47754e+07	0.973404	59.168	51.8773	0.597698	0.00642708	1.41222e-07	1.65166e+06	0.109411	42.4392	41.899	0.012061	0.000104507	5.59901e-08
693	3HP_10AM	2000	Under	1.40422e+07	0.958417	58.0658	51.6559	0.596453	0.00621078	1.37694e-07	1.70773e+06	0.107879	44.2331	43.6787	0.0126398	0.000106423	5.52424e-08
694	3HP_10AM	2250	Under	1.41484e+07	0.999019	50.6546	56.439	0.599967	0.00606	1.48748e-07	1.61876e+06	0.109556	40.4778	39.954	0.0119681	9.96016e-05	5.66761e-08
695	3HP_10AM	25	Under	3.61212e+07	0.640929	210.367	-21.5093	0.533352	0.0159303	1.44902e-07	5.31149e+06	0.100441	48.5849	39.5397	0.0156984	0.000195709	5.71476e-08
696	3HP_10AM	250	Under	2.33931e+07	0.798664	123.069	18.7283	0.576466	0.00978436	1.21892e-07	3.02119e+06	0.121238	45.6964	42.0679	0.0134637	0.00014504	6.03595e-08
697	3HP_10AM	2500	Under	1.40304e+07	0.995609	49.0254	56.8107	0.601855	0.005909	1.52408e-07	1.72855e+06	0.105496	43.9254	42.5888	0.0126756	0.000103726	5.44773e-08
698	3HP_10AM	50	Under	3.61687e+07	0.752353	158.425	9.0569	0.556045	0.0139545	1.59007e-07	5.17672e+06	0.118293	50.1072	42.4774	0.014889	0.000180302	6.28996e-08
699	3HP_10AM	500	Under	1.75213e+07	0.869619	92.5481	38.8802	0.575632	0.00827961	1.42032e-07	2.36904e+06	0.119171	41.233	38.4141	0.0135703	0.000133716	5.90897e-08
700	3HP_10AM	75	Under	3.36656e+07	0.775923	147.917	12.7419	0.562534	0.0128657	1.52673e-07	4.83605e+06	0.114248	49.74	43.6465	0.0146527	0.000171941	5.69079e-08
701	3HP_10AM	750	Under	1.596e+07	0.903402	83.827	40.7306	0.581114	0.00761394	1.38436e-07	2.00043e+06	0.120661	44.2872	42.0675	0.0129483	0.000122667	5.79501e-08
702	3HP_20AM	1	Post	5.89221e+07	0.794482	183.738	-58.7964	0.652061	0.0107474	4.9722e-08	6.89886e+06	0.0921486	43.6818	42.1947	0.0130403	0.00017481	3.38345e-08
703	3HP_20AM	10	Post	3.83575e+07	0.86817	196.628	-84.1142	0.644158	0.00872366	3.64185e-08	4.49284e+06	0.0702005	41.5388	41.2614	0.0123061	0.00015109	2.51457e-08
704	3HP_20AM	100	Post	2.08047e+07	0.949174	177.359	-77.793	0.626223	0.00678467	3.33171e-08	2.27818e+06	0.0508078	42.5209	42.8544	0.0113704	0.000109308	1.89625e-08
705	3HP_20AM	1000	Post	1.68608e+07	0.986379	194.597	-99.6798	0.625425	0.00625598	2.81797e-08	1.74599e+06	0.0376629	40.5235	40.5296	0.0106341	0.000102695	1.41835e-08
706	3HP_20AM	1250	Post	1.83633e+07	0.962122	196.985	-99.5449	0.63025	0.0065186	2.61737e-08	1.90323e+06	0.0468277	42.5555	42.8315	0.0109922	0.000112244	1.62923e-08
707	3HP_20AM	1500	Post	1.94617e+07	0.994702	175.865	-78.5276	0.634164	0.00660014	3.36901e-08	1.95829e+06	0.0400323	41.0646	41.2441	0.011111	0.00011131	1.4993e-08
708	3HP_20AM	1750	Post	1.97047e+07	0.984997	184.582	-85.6652	0.631604	0.00673956	3.27492e-08	2.04742e+06	0.0413783	40.0772	39.999	0.0111276	0.000114298	1.47857e-08
709	3HP_20AM	2000	Post	1.89721e+07	0.976577	111.75	-13.6814	0.6286	0.00668039	4.93279e-08	2.02123e+06	0.0619625	47.4187	47.7619	0.0112243	0.00011879	2.35892e-08
710	3HP_20AM	2250	Post	2.00304e+07	0.997512	176.623	-76.9725	0.630539	0.0068129	3.68362e-08	2.08906e+06	0.0384732	38.0288	38.3966	0.0111331	0.000112724	1.42462e-08
711	3HP_20AM	25	Post	3.1393e+07	0.925197	156.428	-51.3091	0.642861	0.00782	4.55148e-08	3.42299e+06	0.05707	41.366	41.5887	0.0118318	0.000129506	2.0467e-08
712	3HP_20AM	250	Post	1.84232e+07	0.993871	164.691	-66.3288	0.624583	0.00656233	3.60945e-08	1.9749e+06	0.0443481	41.4344	41.6962	0.011076	0.000105923	1.62648e-08
713	3HP_20AM	2500	Post	2.11034e+07	0.974966	182.259	-79.402	0.629163	0.00709101	3.66152e-08	2.25998e+06	0.04406	39.4814	39.8647	0.0112364	0.000120533	1.57333e-08
714	3HP_20AM	50	Post	2.52371e+07	0.886389	196.134	-94.4053	0.635651	0.00717343	2.75032e-08	2.69137e+06	0.0618596	44.2166	44.5333	0.0116172	0.000119087	2.42343e-08
715	3HP_20AM	500	Post	1.5813e+07	0.982991	165.299	-71.3773	0.622359	0.00610251	3.12095e-08	1.6922e+06	0.0417239	42.5245	42.6869	0.0109284	0.000100671	1.58747e-08
716	3HP_20AM	75	Post	2.23985e+07	0.929971	108.109	-7.58781	0.629765	0.00695839	5.27311e-08	2.42859e+06	0.0788997	49.1264	48.9365	0.0115422	0.000118005	2.97842e-08
717	3HP_20AM	750	Post	1.7619e+07	0.97333	128.5	-33.6503	0.630687	0.00630264	3.73823e-08	1.86914e+06	0.058208	48.1983	48.2398	0.0112959	0.000109569	2.30019e-08
718	3HP_20AM	1	Under	5.82137e+07	0.825076	173.526	-50.5772	0.655526	0.0103647	5.52786e-08	7.16848e+06	0.0855462	43.6369	42.6651	0.0134021	0.000186278	3.00397e-08
719	3HP_20AM	10	Under	3.81995e+07	0.945301	142.948	-34.5041	0.648437	0.008439	5.70745e-08	4.17237e+06	0.0586727	39.8272	39.9045	0.0118133	0.000138602	2.13267e-08
720	3HP_20AM	100	Under	1.82576e+07	0.886102	177.898	-79.2755	0.619471	0.00632424	2.66155e-08	2.09313e+06	0.0669871	45.6611	46.0294	0.0121227	0.000107777	2.48954e-08
721	3HP_20AM	1000	Under	1.30089e+07	0.997434	182.84	-98.0808	0.624431	0.0049473	2.10262e-08	1.34264e+06	0.0462737	45.588	45.8727	0.0109716	8.29291e-05	1.70297e-08
722	3HP_20AM	1250	Under	1.32413e+07	0.998354	182.525	-98.3457	0.627799	0.00486956	1.99236e-08	1.35968e+06	0.0469126	46.4455	47.0074	0.0109746	8.37977e-05	1.70189e-08
723	3HP_20AM	1500	Under	1.30745e+07	0.999822	181.38	-97.996	0.628411	0.00479504	1.98286e-08	1.36975e+06	0.0439939	44.6321	44.8728	0.0112117	8.22285e-05	1.56569e-08
724	3HP_20AM	1750	Under	1.31422e+07	0.999768	177.529	-94.2061	0.630007	0.00473664	2.00696e-08	1.36233e+06	0.0439605	46.6043	46.8284	0.0110561	8.24114e-05	1.57673e-08
725	3HP_20AM	2000	Under	1.33494e+07	0.999768	171.003	-88.4416	0.63201	0.00469741	2.09411e-08	1.40028e+06	0.041367	46.9759	47.0953	0.0112064	8.05144e-05	1.71958e-08
726	3HP_20AM	2250	Under	1.39079e+07	0.99479	155.524	-73.4115	0.636593	0.00468905	2.17798e-08	1.36012e+06	0.0427682	45.95	46.1472	0.0106397	7.94339e-05	1.46367e-08
727	3HP_20AM	25	Under	2.79698e+07	0.891155	105.632	0.0531945	0.634962	0.00745742	6.36421e-08	3.31611e+06	0.081382	46.9908	46.4645	0.0126294	0.00013311	3.16357e-08
728	3HP_20AM	250	Under	1.49234e+07	0.977882	103.771	-11.2014	0.617257	0.00567241	4.63821e-08	1.60412e+06	0.0571764	46.7399	46.8862	0.0113027	9.2571e-05	2.33705e-08
729	3HP_20AM	2500	Under	1.39421e+07	0.993917	154.595	-72.7675	0.636863	0.00465676	2.17461e-08	1.41708e+06	0.041521	47.7722	48.1623	0.0108671	8.0565e-05	1.59126e-08
730	3HP_20AM	50	Under	2.34212e+07	0.987956	117.732	-18.0252	0.632398	0.00688399	5.68477e-08	2.48048e+06	0.0559993	42.7245	42.9837	0.0115758	0.000111596	2.0694e-08
731	3HP_20AM	500	Under	1.31843e+07	0.994325	173.366	-85.4415	0.617295	0.00523947	2.47988e-08	1.4246e+06	0.0509965	46.0378	46.2496	0.0111926	8.58711e-05	1.76945e-08
732	3HP_20AM	75	Under	1.99465e+07	0.95109	169.519	-71.1782	0.623796	0.00653945	3.30822e-08	2.261e+06	0.0588771	43.3909	43.6244	0.0119369	0.000108557	2.00315e-08
733	3HP_20AM	750	Under	1.30686e+07	0.999133	184.732	-98.3553	0.622069	0.00506005	2.20248e-08	1.37937e+06	0.0468704	46.3979	46.7042	0.0112615	8.62997e-05	1.81436e-08
734	3LP_0AM	10	Post	1.27469e+07	0.927069	1775.8	409.522	0.418957	0.0251507	1.25518e-06	3.40324e+06	0.077685	266.278	196.097	0.0258055	0.00059546	1.58174e-07
735	3LP_0AM	100	Post	1.1253e+07	0.929306	1820.98	196.598	0.390802	0.026697	1.9736e-06	2.8667e+06	0.0577239	191.902	112.81	0.0262297	0.000563975	1.45142e-07
736	3LP_0AM	1000	Post	1.09595e+07	0.932749	1616.19	208.895	0.386912	0.0260922	2.5031e-06	3.10019e+06	0.0586264	181.428	86.1598	0.028111	0.000581185	1.94364e-07
737	3LP_0AM	1250	Post	1.11092e+07	0.949833	1533.27	203.086	0.388795	0.0255143	2.5604e-06	3.24181e+06	0.0590831	180.172	82.2179	0.0297027	0.000573844	1.98305e-07
738	3LP_0AM	1400	Post	1.16611e+07	0.934969	1638.5	246.569	0.393727	0.026645	2.47791e-06	3.07903e+06	0.0614638	196.167	91.8495	0.0282099	0.00061157	1.9362e-07
739	3LP_0AM	1500	Post	1.14142e+07	0.921706	1715.25	194.022	0.390624	0.026621	2.4146e-06	3.01942e+06	0.0597172	191.227	93.5529	0.0277169	0.000593319	1.82652e-07
740	3LP_0AM	1600	Post	1.13892e+07	0.921887	1729.53	205.493	0.391498	0.0268783	2.40614e-06	2.95689e+06	0.0615135	197.591	97.1756	0.0268304	0.000603191	1.84768e-07
741	3LP_0AM	1750	Post	1.1389e+07	0.921881	1745.41	205.499	0.39154	0.0266798	2.4055e-06	3.07954e+06	0.061045	197.048	96.7866	0.0279534	0.00060178	1.79206e-07
742	3LP_0AM	1850	Post	1.13912e+07	0.922529	1715.61	208.744	0.392431	0.0265189	2.3327e-06	3.1484e+06	0.0628195	205.036	100.904	0.028062	0.000621519	1.85634e-07
743	3LP_0AM	200	Post	1.12611e+07	0.933277	1750.32	197.216	0.389539	0.0268299	2.21876e-06	2.99617e+06	0.0596146	195.025	102.768	0.0282894	0.000593059	1.69713e-07
744	3LP_0AM	2000	Post	1.03041e+07	0.927375	1661.75	200.895	0.380149	0.0260623	2.54549e-06	3.09847e+06	0.0600928	189.758	87.6981	0.0283794	0.000592822	1.93204e-07
745	3LP_0AM	2250	Post	1.03064e+07	0.92762	1652.27	200.325	0.38016	0.0264444	2.5839e-06	3.039e+06	0.0617558	189.953	85.9646	0.0282657	0.000603041	2.03166e-07
746	3LP_0AM	25	Post	1.39166e+07	0.968487	1781.6	409.021	0.42099	0.0267376	1.43444e-06	3.16922e+06	0.0704702	249.095	176.375	0.0256566	0.000599121	1.43188e-07
747	3LP_0AM	250	Post	1.12655e+07	0.9465	1663.09	192.697	0.388914	0.0261238	2.31497e-06	3.03573e+06	0.0584104	184.19	94.2029	0.0280098	0.000562564	1.67228e-07
748	3LP_0AM	2500	Post	1.05072e+07	0.928837	1827.38	294.412	0.383801	0.0277168	2.19396e-06	2.90586e+06	0.0670061	226.287	117.912	0.027184	0.00064964	1.67123e-07
749	3LP_0AM	400	Post	1.1156e+07	0.948188	1627.69	225.979	0.386549	0.0266799	2.48857e-06	2.81762e+06	0.0608881	191.737	90.5958	0.0273022	0.000577083	1.85882e-07
750	3LP_0AM	50	Post	1.18988e+07	0.94544	1864.44	295.948	0.400066	0.0268174	1.65005e-06	3.17655e+06	0.0650071	228.742	150.093	0.0271822	0.000620226	1.36109e-07
751	3LP_0AM	500	Post	1.12333e+07	0.947477	1691.85	225.372	0.388668	0.0268948	2.26923e-06	2.98728e+06	0.0621274	203.402	101.942	0.0283073	0.000612945	1.77326e-07
752	3LP_0AM	600	Post	1.16893e+07	0.93176	1709.85	284.297	0.392919	0.0272349	2.37288e-06	3.05906e+06	0.0634955	203.73	102.571	0.0282774	0.000625795	1.83714e-07
753	3LP_0AM	75	Post	1.07502e+07	0.936266	1799.56	241.771	0.387046	0.0263977	1.94153e-06	3.08419e+06	0.0604537	201.499	117.807	0.0274607	0.000577383	1.49153e-07
754	3LP_0AM	750	Post	1.12867e+07	0.935641	1673.81	241.521	0.388528	0.0274936	2.49914e-06	2.77036e+06	0.0610338	190.945	89.77	0.0267365	0.000599764	2.06369e-07
755	3LP_0AM	10	Under	1.15616e+07	0.977595	1475.09	451.183	0.408106	0.022965	1.25799e-06	3.00868e+06	0.0730368	232.571	186.311	0.0262948	0.00047033	1.60428e-07
756	3LP_0AM	100	Under	8.84197e+06	0.916381	1573.86	165.311	0.362836	0.0233642	1.97049e-06	2.53214e+06	0.055172	152.542	92.3283	0.0279654	0.000426861	1.43393e-07
757	3LP_0AM	1000	Under	8.46711e+06	0.883144	702.216	226.877	0.358791	0.0173341	3.33335e-06	3.18472e+06	0.103108	164.638	58.1879	0.0402682	0.000373605	6.18034e-07
758	3LP_0AM	1250	Under	9.69505e+06	0.839389	601.578	203.562	0.37592	0.0155788	3.40503e-06	3.12055e+06	0.122641	184.336	63.1223	0.0376831	0.000312517	8.62222e-07
759	3LP_0AM	1400	Under	9.8468e+06	0.83609	548.39	207.483	0.379442	0.0148455	3.31581e-06	3.29826e+06	0.135507	200.431	61.8156	0.0388353	0.000306821	1.07472e-06
760	3LP_0AM	1500	Under	1.01818e+07	0.839875	501.854	193.24	0.385587	0.0141942	3.10288e-06	3.6027e+06	0.15006	213.431	69.018	0.0415223	0.000305574	1.17707e-06
761	3LP_0AM	1600	Under	1.06171e+07	0.786429	526.83	186.961	0.38921	0.0138374	3.31849e-06	3.90233e+06	0.154708	214.615	65.2261	0.0426494	0.000309015	1.26219e-06
762	3LP_0AM	1750	Under	1.10414e+07	0.782005	476.415	180.872	0.397036	0.0130556	3.18344e-06	4.13996e+06	0.146637	190.055	61.4691	0.0432514	0.000292557	1.26665e-06
763	3LP_0AM	1850	Under	1.21594e+07	0.782733	439.374	173.701	0.409932	0.0126371	2.87697e-06	4.02233e+06	0.139512	175.949	60.2403	0.0417676	0.000258884	1.23944e-06
764	3LP_0AM	200	Under	8.09881e+06	0.945515	1388.37	200.655	0.349876	0.0231093	2.32006e-06	2.30284e+06	0.0535467	133.311	71.0592	0.0273232	0.000399008	1.58344e-07
765	3LP_0AM	2000	Under	1.36713e+07	0.81798	389.445	190.034	0.426695	0.0122388	2.6584e-06	4.33708e+06	0.149757	173.428	58.836	0.041835	0.000260992	1.31676e-06
766	3LP_0AM	2250	Under	1.33313e+07	0.790066	373.239	184.895	0.427575	0.0112757	2.73409e-06	4.71221e+06	0.155509	153.285	52.7412	0.0423651	0.00024887	1.25881e-06
767	3LP_0AM	25	Under	1.13168e+07	0.953287	1563.18	354.042	0.396787	0.0235371	1.44215e-06	2.84566e+06	0.0665264	203.452	148.261	0.0265785	0.000462828	1.48119e-07
768	3LP_0AM	250	Under	8.38702e+06	0.9133	1329.65	176.544	0.353863	0.0226466	2.44998e-06	2.3969e+06	0.0622039	152.669	75.6103	0.0300334	0.000422727	1.91728e-07
769	3LP_0AM	2500	Under	1.632e+07	0.773149	324.918	174.572	0.456247	0.0104079	2.55597e-06	5.03429e+06	0.11772	150.938	42.2959	0.0543345	0.000254302	2.36597e-06
770	3LP_0AM	400	Under	8.24805e+06	0.887841	1143.87	130.45	0.349806	0.0208477	2.78413e-06	2.53816e+06	0.0676165	141.793	65.536	0.0309753	0.000379302	2.3916e-07
771	3LP_0AM	50	Under	1.02674e+07	0.953693	1579.37	284.628	0.382589	0.0237766	1.65696e-06	2.59245e+06	0.0605746	181.558	122.968	0.0270453	0.000439564	1.39738e-07
772	3LP_0AM	500	Under	8.70475e+06	0.952571	1000.29	257.033	0.356883	0.0214013	2.90231e-06	2.23023e+06	0.0619304	123.146	53.7991	0.0282068	0.000355947	2.45499e-07
773	3LP_0AM	600	Under	8.56934e+06	0.943726	916.091	262.51	0.355285	0.0206598	3.0259e-06	2.39303e+06	0.0680295	124.819	51.8077	0.0298246	0.000362992	2.94923e-07
774	3LP_0AM	75	Under	9.52786e+06	0.962359	1508.98	239.482	0.371376	0.0234924	1.8892e-06	2.51331e+06	0.0548267	155.334	99.2302	0.0270083	0.000432048	1.42136e-07
775	3LP_0AM	750	Under	8.41771e+06	0.904652	844.033	233.539	0.353927	0.0192872	3.19441e-06	2.55518e+06	0.0751283	124.892	50.7688	0.0306989	0.000343272	3.45769e-07
776	3LP_10AM	1	Post	1.3544e+07	0.999286	218.641	124.975	0.407508	0.0264166	1.18888e-06	2.0377e+06	0.00826525	10.962	3.02967	0.0144615	0.000260992	7.69624e-08
777	3LP_10AM	10	Post	1.63383e+07	0.999544	163.678	119.753	0.417684	0.0260472	1.28362e-06	2.5029e+06	0.0120457	10.5658	2.75124	0.0144032	0.000252998	1.08882e-07
778	3LP_10AM	100	Post	2.49422e+07	0.999572	98.2109	114.837	0.479563	0.0199601	1.16386e-06	3.64855e+06	0.0159897	8.11947	2.50467	0.0148895	0.000205767	1.27515e-07
779	3LP_10AM	1000	Post	2.92855e+07	0.99792	72.712	109.526	0.532496	0.0156672	1.13054e-06	4.04979e+06	0.0150338	6.80271	2.16103	0.0142092	0.000187122	1.25616e-07
780	3LP_10AM	1250	Post	3.01495e+07	0.998346	74.6437	107.98	0.533814	0.0160688	9.33278e-07	4.01839e+06	0.0200004	6.47469	2.42697	0.0137382	0.000186893	1.05909e-07
781	3LP_10AM	1500	Post	2.90395e+07	0.999331	75.2858	109.271	0.526166	0.0165177	9.33646e-07	4.05452e+06	0.0188879	6.74191	2.41567	0.0138936	0.000190732	1.04965e-07
782	3LP_10AM	1750	Post	2.84989e+07	0.999894	78.5475	110.287	0.522054	0.0168637	9.37919e-07	4.05135e+06	0.0192917	6.85339	2.50778	0.014169	0.000193982	1.04237e-07
783	3LP_10AM	2000	Post	2.75524e+07	0.998413	82.5341	112.784	0.513726	0.0172952	1.0765e-06	3.87119e+06	0.0155998	7.25514	2.34832	0.014239	0.000193566	1.17878e-07
784	3LP_10AM	2250	Post	2.63252e+07	0.999594	89.2241	113.944	0.504605	0.0177393	1.12668e-06	3.88375e+06	0.0150207	7.45372	2.40615	0.014537	0.000198691	1.17836e-07
785	3LP_10AM	25	Post	1.92531e+07	0.999372	131.275	118.545	0.438258	0.0235382	1.30326e-06	2.85334e+06	0.0123337	9.39941	2.55796	0.0147185	0.000227662	1.2176e-07
786	3LP_10AM	250	Post	2.89007e+07	0.999101	78.0254	110.737	0.515118	0.0171572	1.0327e-06	4.16092e+06	0.0168163	7.12656	2.36427	0.0145719	0.000191591	1.19812e-07
787	3LP_10AM	2500	Post	2.58036e+07	0.998461	90.9557	114.863	0.499364	0.0182148	1.10552e-06	3.63083e+06	0.0145385	7.43294	2.41468	0.0141798	0.000199068	1.1562e-07
788	3LP_10AM	50	Post	2.22909e+07	0.998833	109.413	116.1	0.459939	0.0216922	1.16624e-06	3.38544e+06	0.0160163	8.71781	2.59328	0.0148257	0.000214989	1.21529e-07
789	3LP_10AM	500	Post	3.08844e+07	0.999454	70.4435	108.733	0.533573	0.01604	9.85586e-07	4.27918e+06	0.0190038	6.74701	2.32781	0.0142366	0.000189164	1.1709e-07
790	3LP_10AM	75	Post	2.27928e+07	0.999545	103.28	118.261	0.466873	0.0204481	1.32866e-06	3.35145e+06	0.0128071	8.61654	2.35303	0.0147876	0.00020536	1.38795e-07
791	3LP_10AM	750	Post	3.06196e+07	0.9979	73.0589	107.379	0.53531	0.0158439	9.66249e-07	4.25988e+06	0.0191516	6.63162	2.31712	0.014236	0.000190754	1.11956e-07
792	3LP_10AM	1	Under	1.33062e+07	0.999943	205.209	123.611	0.404733	0.0253154	1.1648e-06	2.05966e+06	0.00842772	10.4175	2.98143	0.0146819	0.000246681	7.82406e-08
793	3LP_10AM	10	Under	1.71375e+07	0.998801	149.158	118.391	0.424479	0.0240544	1.2572e-06	2.56369e+06	0.0121812	9.64641	2.64749	0.0147642	0.000230326	1.04692e-07
794	3LP_10AM	100	Under	2.56385e+07	0.999702	91.0969	112.265	0.490645	0.018039	1.15997e-06	3.75874e+06	0.0143562	7.4113	2.3802	0.0150019	0.000187591	1.23033e-07
795	3LP_10AM	1000	Under	2.56771e+07	0.999109	55.3863	99.7165	0.57003	0.0113871	8.20049e-07	3.27941e+06	0.0206348	5.0319	2.11675	0.0132768	0.000160609	9.40775e-08
796	3LP_10AM	1250	Under	2.50875e+07	0.999691	51.5692	99.3609	0.576006	0.0109626	7.60897e-07	3.21319e+06	0.0213434	4.92896	2.09876	0.0134	0.00016119	9.07579e-08
797	3LP_10AM	1500	Under	2.5088e+07	0.999384	51.1941	98.6524	0.579907	0.0106873	7.83791e-07	3.18454e+06	0.0218777	4.6996	2.05065	0.0131288	0.000159541	8.87935e-08
798	3LP_10AM	1750	Under	2.60748e+07	0.999133	50.0708	97.6855	0.58631	0.0105315	7.43132e-07	3.21894e+06	0.0215262	4.76276	2.08543	0.0133088	0.000163313	8.72161e-08
799	3LP_10AM	2000	Under	2.61811e+07	0.999485	48.4478	98.3331	0.58971	0.0103833	7.22382e-07	3.2727e+06	0.0234126	4.60702	2.10317	0.0134223	0.00016221	8.58382e-08
800	3LP_10AM	2250	Under	2.58192e+07	0.999324	48.8413	98.4211	0.589614	0.0102067	7.26874e-07	3.25238e+06	0.0227544	4.66687	2.08664	0.0134282	0.000162242	8.63229e-08
801	3LP_10AM	25	Under	2.0504e+07	0.999656	121.528	116.441	0.448464	0.021604	1.29069e-06	2.91883e+06	0.0115755	9.02937	2.38642	0.0149989	0.000206568	1.23831e-07
802	3LP_10AM	250	Under	2.78414e+07	0.999126	72.8862	106.691	0.528366	0.0150149	9.75757e-07	3.98059e+06	0.0170322	6.252	2.26127	0.0142727	0.000178067	1.06757e-07
803	3LP_10AM	2500	Under	2.60848e+07	0.999953	47.3879	97.3263	0.593551	0.0101207	7.02263e-07	3.28945e+06	0.0221203	4.61467	2.09435	0.0133439	0.000163418	8.53925e-08
804	3LP_10AM	50	Under	2.19884e+07	0.99916	104.564	114.313	0.463991	0.0196899	1.23419e-06	3.38558e+06	0.0160493	8.09705	2.47752	0.0147982	0.000198062	1.2233e-07
805	3LP_10AM	500	Under	2.80367e+07	0.998802	61.5452	103.128	0.555662	0.0129777	8.73876e-07	3.69049e+06	0.0196524	5.70521	2.20317	0.0139779	0.000169572	1.00148e-07
806	3LP_10AM	75	Under	2.5141e+07	0.999758	95.1505	113.329	0.484627	0.0187293	1.17981e-06	3.70809e+06	0.0161454	7.70213	2.42646	0.0150988	0.00019482	1.23755e-07
807	3LP_10AM	750	Under	2.65253e+07	0.999353	55.7605	100.741	0.565346	0.0120159	8.14989e-07	3.49496e+06	0.0203693	5.26904	2.13068	0.0138548	0.000165057	9.58831e-08
808	3LP_20AM	1	Post	2.44858e+07	0.650287	352.437	-11.0561	0.479316	0.0192279	3.78999e-07	4.27511e+06	0.0879522	64.9812	39.9689	0.018022	0.000253242	6.84517e-08
809	3LP_20AM	10	Post	2.01911e+07	0.523634	407.928	-29.4755	0.435664	0.0250403	5.53387e-07	3.38564e+06	0.0533746	46.2598	25.8186	0.0161952	0.000282072	1.51636e-07
810	3LP_20AM	100	Post	3.31158e+07	0.550626	316.444	-80.0419	0.509753	0.0187633	9.29687e-08	5.20076e+06	0.0778594	46.5417	38.3619	0.0158071	0.000216335	4.50404e-08
811	3LP_20AM	1000	Post	3.18145e+07	0.645968	197.204	-10.2892	0.562633	0.0134795	8.81574e-08	4.71308e+06	0.122317	56.646	49.617	0.0148118	0.00020151	6.34053e-08
812	3LP_20AM	1250	Post	3.1789e+07	0.624127	214.976	-23.2576	0.561308	0.0136447	8.08719e-08	4.66989e+06	0.111079	55.2855	48.5944	0.014758	0.00019943	5.5234e-08
813	3LP_20AM	1500	Post	3.40856e+07	0.715	155.255	35.7819	0.557705	0.0144081	1.69247e-07	4.73715e+06	0.126925	54.2552	45.9421	0.0143634	0.000195407	6.92686e-08
814	3LP_20AM	1750	Post	3.55986e+07	0.644098	259.603	-63.4246	0.552392	0.0153871	8.07418e-08	4.88507e+06	0.0923554	50.3295	44.7014	0.0141717	0.000195235	4.78036e-08
815	3LP_20AM	2000	Post	3.58743e+07	0.738836	146.131	54.4132	0.550979	0.0156844	2.3287e-07	5.07573e+06	0.132462	50.4981	39.5195	0.0154764	0.000211672	8.36942e-08
816	3LP_20AM	2250	Post	3.51179e+07	0.603738	290.315	-81.4493	0.540769	0.0165077	6.99501e-08	5.12417e+06	0.09897	52.868	44.7028	0.0150647	0.000211488	5.18441e-08
817	3LP_20AM	25	Post	2.58002e+07	0.515323	382.702	-84.3201	0.466468	0.0228016	1.89214e-07	4.18671e+06	0.0528145	39.959	29.7624	0.0159024	0.000252319	6.05406e-08
818	3LP_20AM	250	Post	3.63427e+07	0.655345	237.377	-42.3414	0.546602	0.0156782	9.30874e-08	5.4571e+06	0.0969218	50.4773	44.2925	0.015296	0.000201011	4.88258e-08
819	3LP_20AM	2500	Post	3.21593e+07	0.617074	237.488	-20.5436	0.540843	0.0158488	1.11612e-07	4.75022e+06	0.108351	57.7906	48.5875	0.0153017	0.000212601	6.48395e-08
820	3LP_20AM	50	Post	2.86071e+07	0.512635	334.252	-65.2757	0.485732	0.0206021	1.4213e-07	4.60189e+06	0.0642921	44.2572	36.8825	0.0152592	0.000228277	6.86286e-08
821	3LP_20AM	500	Post	3.38034e+07	0.672174	183.369	2.95643	0.563136	0.0138896	1.05213e-07	4.71095e+06	0.119609	56.4362	50.0623	0.0145929	0.000195934	6.27981e-08
822	3LP_20AM	75	Post	3.13781e+07	0.543923	312.553	-65.2953	0.500921	0.0195875	1.14056e-07	4.8511e+06	0.0759542	48.8459	40.8326	0.0154368	0.000225868	5.73533e-08
823	3LP_20AM	750	Post	3.60066e+07	0.68325	218.084	-35.5279	0.564507	0.0141726	1.00675e-07	4.99782e+06	0.104449	49.307	42.7445	0.0146073	0.00019543	5.36035e-08
824	3LP_20AM	1	Under	1.86485e+07	0.703543	292.799	32.8468	0.44502	0.017833	4.42791e-07	3.47235e+06	0.0964996	56.3765	32.4224	0.0197113	0.000210767	6.97098e-08
825	3LP_20AM	10	Under	2.10538e+07	0.512335	403.209	-59.9405	0.444927	0.0233536	3.26035e-07	3.76786e+06	0.060917	47.9519	32.1321	0.0169296	0.000260977	9.52637e-08
826	3LP_20AM	100	Under	3.23923e+07	0.528374	288.068	-61.5571	0.522825	0.0166082	8.08579e-08	5.28609e+06	0.0930601	51.4194	43.4899	0.0160101	0.00020914	5.78788e-08
827	3LP_20AM	1000	Under	1.97445e+07	0.864419	85.8079	61.8783	0.585494	0.00882143	1.50325e-07	2.45067e+06	0.146143	52.9881	49.0399	0.0134476	0.000147266	7.45818e-08
828	3LP_20AM	1250	Under	1.88906e+07	0.8921	76.5447	67.0402	0.589933	0.00839602	1.62584e-07	2.35586e+06	0.147559	52.2402	47.8738	0.0138127	0.000147271	7.2941e-08
829	3LP_20AM	1500	Under	1.73195e+07	0.88457	76.9815	63.8902	0.587647	0.00801406	1.46587e-07	2.24125e+06	0.146351	48.8969	45.803	0.0133353	0.000145055	7.30399e-08
830	3LP_20AM	1750	Under	1.72422e+07	0.879824	75.825	63.3213	0.591889	0.00779836	1.42129e-07	2.13286e+06	0.139724	54.6048	52.2286	0.0129874	0.000135328	6.92851e-08
831	3LP_20AM	2000	Under	1.72358e+07	0.879249	74.3079	63.7408	0.595233	0.0076502	1.40294e-07	2.0745e+06	0.146344	51.429	48.8674	0.0129706	0.000135621	7.37323e-08
832	3LP_20AM	2250	Under	1.7008e+07	0.869694	73.1807	64.6685	0.596532	0.00748053	1.41132e-07	2.12303e+06	0.143679	49.8163	47.1868	0.013206	0.00013493	7.23451e-08
833	3LP_20AM	25	Under	2.47884e+07	0.505219	319.944	-25.3962	0.468857	0.0207574	2.7624e-07	4.22906e+06	0.0652908	40.8839	28.7258	0.0162793	0.000233506	1.01774e-07
834	3LP_20AM	250	Under	3.31471e+07	0.756348	143.254	36.1608	0.565786	0.0131298	1.53425e-07	4.60648e+06	0.137999	57.3518	49.5373	0.0148394	0.000190026	7.50475e-08
835	3LP_20AM	2500	Under	1.8034e+07	0.97722	57.0125	77.7663	0.604043	0.00743014	1.80544e-07	2.13738e+06	0.14463	50.3409	47.9934	0.013299	0.000139795	7.3463e-08
836	3LP_20AM	50	Under	3.07664e+07	0.571749	249.159	-4.06488	0.501167	0.0186794	2.01022e-07	4.81391e+06	0.0828685	44.4046	33.5095	0.0158445	0.000220082	7.90703e-08
837	3LP_20AM	500	Under	2.63116e+07	0.778579	122.327	39.5874	0.580811	0.010697	1.24115e-07	3.53348e+06	0.142698	58.8594	53.1926	0.014469	0.00017309	7.27572e-08
838	3LP_20AM	75	Under	3.07078e+07	0.506189	311.747	-74.926	0.510812	0.0173682	8.20598e-08	5.23564e+06	0.0869509	48.9545	41.0307	0.0159742	0.000208778	6.2298e-08
839	3LP_20AM	750	Under	2.1412e+07	0.831178	103.145	49.9678	0.580825	0.0094975	1.36704e-07	2.8402e+06	0.148511	58.6027	53.7059	0.0140484	0.000153688	7.30564e-08
