# Supplementary material for: Physical scaling for predicting shear viscosity and memory effects of lithium-ion battery cathode slurries
Source: Royal Society of Chemistry journal article supplement (doi:10.1039/d4sm01493f), 2025-01-01
Supplement: d4sm01493f2.xlsx [file d4sm01493f2.xlsx]

## Sheet: Sheet1
	Name	wt_cb	phieff_cb	PVDF MW	C_p (mg/mL)	Viscosity_m (Pa*s)	w_AM (%)	Intent	Step num	Shear rate (1/s)	Stress (Pa)	Stress_err (Pa)	Stress_0 (Pa)	Viscosity (Pa*s)
98	0P_0AM	0.03	0.255722	0P	0	0.00165	0	PRESHEAR	0	2500.56	29.12	0.0297978	29.1688	0.0116649
99	0P_0AM	0.03	0.255722	0P	0	0.00165	0	SHEAR	1	3500.77	35.3817	0.0342081	35.4429	0.0101243
100	0P_0AM	0.03	0.255722	0P	0	0.00165	0	SHEAR	10	2750.61	31.1263	0.00685977	31.1396	0.011321
101	0P_0AM	0.03	0.255722	0P	0	0.00165	0	POSTSHEAR	11	-9.1068e-06	1.23861	0.0118629	1.26003	-138362
102	0P_0AM	0.03	0.255722	0P	0	0.00165	0	PRESHEAR	12	2500.56	29.5681	0.0312453	29.6141	0.011843
103	0P_0AM	0.03	0.255722	0P	0	0.00165	0	SHEAR	13	2250.48	27.9946	0.0238124	28.0446	0.0124616
104	0P_0AM	0.03	0.255722	0P	0	0.00165	0	POSTSHEAR	14	-4.97676e-06	1.5792	0.00785818	1.60557	-322614
105	0P_0AM	0.03	0.255722	0P	0	0.00165	0	PRESHEAR	15	2500.55	29.6589	0.0345007	29.7085	0.0118808
106	0P_0AM	0.03	0.255722	0P	0	0.00165	0	SHEAR	16	2000.45	26.4253	0.0169026	26.4531	0.0132236
107	0P_0AM	0.03	0.255722	0P	0	0.00165	0	POSTSHEAR	17	-1.88446e-05	1.32504	0.00957323	1.34945	-71609.3
108	0P_0AM	0.03	0.255722	0P	0	0.00165	0	PRESHEAR	18	2500.55	29.7658	0.0297229	29.815	0.0119234
109	0P_0AM	0.03	0.255722	0P	0	0.00165	0	SHEAR	19	1850.41	25.4943	0.0129461	25.5179	0.0137904
110	0P_0AM	0.03	0.255722	0P	0	0.00165	0	POSTSHEAR	2	-3.42876e-06	1.42671	0.00589012	1.44081	-420213
111	0P_0AM	0.03	0.255722	0P	0	0.00165	0	POSTSHEAR	20	-7.07155e-05	1.61495	0.00769361	1.63403	-23107.1
112	0P_0AM	0.03	0.255722	0P	0	0.00165	0	PRESHEAR	21	2500.56	29.8565	0.0308413	29.9025	0.0119584
113	0P_0AM	0.03	0.255722	0P	0	0.00165	0	SHEAR	22	1750.39	24.9117	0.0148165	24.9379	0.0142471
114	0P_0AM	0.03	0.255722	0P	0	0.00165	0	POSTSHEAR	23	-5.5898e-06	1.54213	0.00765112	1.61895	-289626
115	0P_0AM	0.03	0.255722	0P	0	0.00165	0	PRESHEAR	24	2500.56	29.9981	0.0294607	30.0346	0.0120111
116	0P_0AM	0.03	0.255722	0P	0	0.00165	0	SHEAR	25	1600.35	23.9658	0.00721494	23.9779	0.0149829
117	0P_0AM	0.03	0.255722	0P	0	0.00165	0	POSTSHEAR	26	4.04767e-06	1.68897	0.00859643	1.70175	420428
118	0P_0AM	0.03	0.255722	0P	0	0.00165	0	PRESHEAR	27	2500.55	30.1916	0.0372698	30.2435	0.0120947
119	0P_0AM	0.03	0.255722	0P	0	0.00165	0	SHEAR	28	1500.33	23.4722	0.0143035	23.4921	0.0156579
120	0P_0AM	0.03	0.255722	0P	0	0.00165	0	POSTSHEAR	29	-2.08173e-05	1.64668	0.00601193	1.65903	-79694.7
121	0P_0AM	0.03	0.255722	0P	0	0.00165	0	PRESHEAR	3	2500.56	29.3092	0.0283975	29.3554	0.0117395
122	0P_0AM	0.03	0.255722	0P	0	0.00165	0	PRESHEAR	30	2500.55	30.4477	0.0369753	30.5132	0.0122026
123	0P_0AM	0.03	0.255722	0P	0	0.00165	0	SHEAR	31	1400.31	22.8918	0.00677824	22.9068	0.0163583
124	0P_0AM	0.03	0.255722	0P	0	0.00165	0	POSTSHEAR	32	3.132e-05	1.77349	0.00680643	1.78694	57054.2
125	0P_0AM	0.03	0.255722	0P	0	0.00165	0	PRESHEAR	33	2500.54	30.583	0.0486555	30.6514	0.0122579
126	0P_0AM	0.03	0.255722	0P	0	0.00165	0	SHEAR	34	1250.28	21.8593	0.00863332	21.8771	0.0174978
127	0P_0AM	0.03	0.255722	0P	0	0.00165	0	POSTSHEAR	35	-1.08038e-05	1.81285	0.00706741	1.83646	-169983
128	0P_0AM	0.03	0.255722	0P	0	0.00165	0	PRESHEAR	36	2500.56	30.646	0.0462062	30.7262	0.0122877
129	0P_0AM	0.03	0.255722	0P	0	0.00165	0	SHEAR	37	1000.22	19.9197	0.0148326	19.9529	0.0199485
130	0P_0AM	0.03	0.255722	0P	0	0.00165	0	POSTSHEAR	38	1.96247e-05	1.84962	0.00712696	1.87289	95435.4
131	0P_0AM	0.03	0.255722	0P	0	0.00165	0	PRESHEAR	39	2500.53	30.7266	0.0456963	30.815	0.0123234
132	0P_0AM	0.03	0.255722	0P	0	0.00165	0	SHEAR	4	3250.72	33.9808	0.033708	34.0403	0.0104716
133	0P_0AM	0.03	0.255722	0P	0	0.00165	0	SHEAR	40	900.198	19.1328	0.0191986	19.1768	0.0213029
134	0P_0AM	0.03	0.255722	0P	0	0.00165	0	POSTSHEAR	41	2.84336e-05	1.90791	0.00703982	1.91849	67472.8
135	0P_0AM	0.03	0.255722	0P	0	0.00165	0	PRESHEAR	42	2500.57	30.7801	0.0477446	30.8801	0.0123492
136	0P_0AM	0.03	0.255722	0P	0	0.00165	0	SHEAR	43	750.166	17.8456	0.0219882	17.8936	0.0238528
137	0P_0AM	0.03	0.255722	0P	0	0.00165	0	POSTSHEAR	44	-3.3353e-06	1.88773	0.008774	1.9057	-571373
138	0P_0AM	0.03	0.255722	0P	0	0.00165	0	PRESHEAR	45	2500.55	30.8273	0.0490578	30.9455	0.0123755
139	0P_0AM	0.03	0.255722	0P	0	0.00165	0	SHEAR	46	600.135	16.4567	0.0234801	16.5166	0.0275214
140	0P_0AM	0.03	0.255722	0P	0	0.00165	0	POSTSHEAR	47	-4.85319e-05	1.9295	0.00857572	1.94753	-40128.8
141	0P_0AM	0.03	0.255722	0P	0	0.00165	0	PRESHEAR	48	2500.56	30.9009	0.0531749	30.9795	0.012389
142	0P_0AM	0.03	0.255722	0P	0	0.00165	0	SHEAR	49	500.11	15.4815	0.0248806	15.5494	0.031092
143	0P_0AM	0.03	0.255722	0P	0	0.00165	0	POSTSHEAR	5	8.06192e-06	1.45277	0.00566639	1.46397	181590
144	0P_0AM	0.03	0.255722	0P	0	0.00165	0	POSTSHEAR	50	2.33582e-06	2.00534	0.00487429	2.0248	866845
145	0P_0AM	0.03	0.255722	0P	0	0.00165	0	PRESHEAR	51	2500.55	30.9169	0.055498	31.0515	0.0124179
146	0P_0AM	0.03	0.255722	0P	0	0.00165	0	SHEAR	52	400.089	14.4157	0.0242125	14.5146	0.0362784
147	0P_0AM	0.03	0.255722	0P	0	0.00165	0	POSTSHEAR	53	-5.07966e-06	2.17587	0.00586733	2.20306	-433703
148	0P_0AM	0.03	0.255722	0P	0	0.00165	0	PRESHEAR	54	2500.55	30.9873	0.0577504	31.09	0.0124333
149	0P_0AM	0.03	0.255722	0P	0	0.00165	0	SHEAR	55	300.065	13.227	0.0209496	13.3536	0.0445023
150	0P_0AM	0.03	0.255722	0P	0	0.00165	0	POSTSHEAR	56	1.66331e-05	2.31491	0.00823905	2.34612	141051
151	0P_0AM	0.03	0.255722	0P	0	0.00165	0	PRESHEAR	57	2500.54	31.0187	0.0525763	31.1429	0.0124545
152	0P_0AM	0.03	0.255722	0P	0	0.00165	0	SHEAR	58	250.056	12.5919	0.0232481	12.7354	0.0509303
153	0P_0AM	0.03	0.255722	0P	0	0.00165	0	POSTSHEAR	59	-2.5162e-06	2.3942	0.00583201	2.42611	-964198
154	0P_0AM	0.03	0.255722	0P	0	0.00165	0	PRESHEAR	6	2500.56	29.3948	0.0316125	29.4519	0.0117781
155	0P_0AM	0.03	0.255722	0P	0	0.00165	0	PRESHEAR	60	2500.55	31.0909	0.056239	31.1932	0.0124745
156	0P_0AM	0.03	0.255722	0P	0	0.00165	0	SHEAR	61	200.045	11.8754	0.0248369	12.0684	0.0603285
157	0P_0AM	0.03	0.255722	0P	0	0.00165	0	POSTSHEAR	62	-4.31449e-05	2.19205	0.0123985	2.41563	-55988.7
158	0P_0AM	0.03	0.255722	0P	0	0.00165	0	PRESHEAR	63	2500.55	31.1396	0.0590353	31.2353	0.0124914
159	0P_0AM	0.03	0.255722	0P	0	0.00165	0	SHEAR	64	150.035	11.0965	0.0251249	11.3015	0.0753257
160	0P_0AM	0.03	0.255722	0P	0	0.00165	0	POSTSHEAR	65	1.04028e-05	2.5405	0.00442539	2.57864	247880
161	0P_0AM	0.03	0.255722	0P	0	0.00165	0	PRESHEAR	66	2500.55	31.1434	0.0612439	31.2581	0.0125005
162	0P_0AM	0.03	0.255722	0P	0	0.00165	0	SHEAR	67	100.022	10.17	0.0179001	10.4399	0.104376
163	0P_0AM	0.03	0.255722	0P	0	0.00165	0	POSTSHEAR	68	-4.48029e-05	2.71454	0.00771489	2.77696	-61981.6
164	0P_0AM	0.03	0.255722	0P	0	0.00165	0	PRESHEAR	69	2500.55	31.2102	0.0599003	31.2876	0.0125123
165	0P_0AM	0.03	0.255722	0P	0	0.00165	0	SHEAR	7	3000.68	32.5335	0.033463	32.5932	0.0108619
166	0P_0AM	0.03	0.255722	0P	0	0.00165	0	SHEAR	70	75.0162	9.65546	0.0172001	9.92343	0.132284
167	0P_0AM	0.03	0.255722	0P	0	0.00165	0	POSTSHEAR	71	-1.04926e-05	2.76381	0.00972323	2.84346	-270997
168	0P_0AM	0.03	0.255722	0P	0	0.00165	0	PRESHEAR	72	2500.56	31.2226	0.0597026	31.3155	0.0125234
169	0P_0AM	0.03	0.255722	0P	0	0.00165	0	SHEAR	73	50.0109	9.02258	0.0169638	9.3125	0.186209
170	0P_0AM	0.03	0.255722	0P	0	0.00165	0	POSTSHEAR	74	-2.38556e-05	2.55921	0.00531276	2.83998	-119049
171	0P_0AM	0.03	0.255722	0P	0	0.00165	0	PRESHEAR	75	2500.57	31.2485	0.0637401	31.3363	0.0125316
172	0P_0AM	0.03	0.255722	0P	0	0.00165	0	SHEAR	76	25.0057	8.10213	0.0162434	8.56176	0.342392
173	0P_0AM	0.03	0.255722	0P	0	0.00165	0	POSTSHEAR	77	1.48333e-05	3.04687	0.00879087	3.21313	216616
174	0P_0AM	0.03	0.255722	0P	0	0.00165	0	PRESHEAR	78	2500.58	31.2671	0.0716186	31.3634	0.0125425
175	0P_0AM	0.03	0.255722	0P	0	0.00165	0	SHEAR	79	10.0028	5.5017	0.031039	7.82098	0.781878
176	0P_0AM	0.03	0.255722	0P	0	0.00165	0	POSTSHEAR	8	-1.93082e-05	1.45739	0.0066591	1.46787	-76023
177	0P_0AM	0.03	0.255722	0P	0	0.00165	0	POSTSHEAR	80	1.20088e-05	2.17785	0.00582922	2.24591	187021
178	0P_0AM	0.03	0.255722	0P	0	0.00165	0	PRESHEAR	81	2500.56	31.2946	0.0646228	31.3984	0.0125565
179	0P_0AM	0.03	0.255722	0P	0	0.00165	0	PRESHEAR	9	2500.56	29.4711	0.0278833	29.5184	0.0118047
180	0P_0p1AM	0.03	0.255722	0P	0	0.00165	0.1	PRESHEAR	0	2500.29	20.5873	0.0856934	20.7891	0.00831469
181	0P_0p1AM	0.03	0.255722	0P	0	0.00165	0.1	SHEAR	1	2500.3	20.5073	0.0799324	20.7202	0.0082871
182	0P_0p1AM	0.03	0.255722	0P	0	0.00165	0.1	SHEAR	10	1750.21	16.1427	0.0353869	16.2196	0.00926722
183	0P_0p1AM	0.03	0.255722	0P	0	0.00165	0.1	POSTSHEAR	11	1.63213e-05	0.371742	0.017928	0.43269	26510.7
184	0P_0p1AM	0.03	0.255722	0P	0	0.00165	0.1	PRESHEAR	12	2500.3	20.0806	0.0770607	20.2634	0.00810438
185	0P_0p1AM	0.03	0.255722	0P	0	0.00165	0.1	SHEAR	13	1500.18	14.637	0.019737	14.6971	0.00979693
186	0P_0p1AM	0.03	0.255722	0P	0	0.00165	0.1	POSTSHEAR	14	2.73626e-05	0.362308	0.0120894	0.432751	15815.4
187	0P_0p1AM	0.03	0.255722	0P	0	0.00165	0.1	PRESHEAR	15	2500.29	19.9957	0.0755776	20.1685	0.00806645
188	0P_0p1AM	0.03	0.255722	0P	0	0.00165	0.1	SHEAR	16	1250.15	13.1148	0.0141899	13.1826	0.0105448
189	0P_0p1AM	0.03	0.255722	0P	0	0.00165	0.1	POSTSHEAR	17	-1.31943e-06	0.346969	0.0162336	0.419617	-318029
190	0P_0p1AM	0.03	0.255722	0P	0	0.00165	0.1	PRESHEAR	18	2500.31	19.9038	0.0723471	20.0733	0.00802834
191	0P_0p1AM	0.03	0.255722	0P	0	0.00165	0.1	SHEAR	19	1000.12	11.5107	0.0221322	11.6086	0.0116072
192	0P_0p1AM	0.03	0.255722	0P	0	0.00165	0.1	POSTSHEAR	2	-2.64919e-05	0.372362	0.0247806	0.438992	-16570.8
193	0P_0p1AM	0.03	0.255722	0P	0	0.00165	0.1	POSTSHEAR	20	4.83544e-05	0.353801	0.0175779	0.414418	8570.44
194	0P_0p1AM	0.03	0.255722	0P	0	0.00165	0.1	PRESHEAR	21	2500.29	19.8069	0.0761948	19.9877	0.00799416
195	0P_0p1AM	0.03	0.255722	0P	0	0.00165	0.1	SHEAR	22	750.087	9.82099	0.0336121	9.94423	0.0132574
196	0P_0p1AM	0.03	0.255722	0P	0	0.00165	0.1	POSTSHEAR	23	1.92238e-06	0.382114	0.0170216	0.454165	236251
197	0P_0p1AM	0.03	0.255722	0P	0	0.00165	0.1	PRESHEAR	24	2500.31	19.7211	0.0793478	19.9034	0.00796038
198	0P_0p1AM	0.03	0.255722	0P	0	0.00165	0.1	SHEAR	25	500.058	8.06012	0.0289122	8.20212	0.0164023
199	0P_0p1AM	0.03	0.255722	0P	0	0.00165	0.1	POSTSHEAR	26	3.74031e-05	0.399006	0.015018	0.460983	12324.7
200	0P_0p1AM	0.03	0.255722	0P	0	0.00165	0.1	PRESHEAR	27	2500.3	19.5976	0.0671419	19.8043	0.00792075
201	0P_0p1AM	0.03	0.255722	0P	0	0.00165	0.1	SHEAR	28	250.03	6.02901	0.0215681	6.18372	0.0247319
202	0P_0p1AM	0.03	0.255722	0P	0	0.00165	0.1	POSTSHEAR	29	3.70774e-05	0.479546	0.0113547	0.546191	14731.1
203	0P_0p1AM	0.03	0.255722	0P	0	0.00165	0.1	PRESHEAR	3	2500.3	20.4263	0.0818042	20.6446	0.00825686
204	0P_0p1AM	0.03	0.255722	0P	0	0.00165	0.1	PRESHEAR	30	2500.31	19.5726	0.073353	19.7357	0.0078933
205	0P_0p1AM	0.03	0.255722	0P	0	0.00165	0.1	SHEAR	31	100.003	4.49219	0.0225111	4.59619	0.0459605
206	0P_0p1AM	0.03	0.255722	0P	0	0.00165	0.1	POSTSHEAR	32	6.90608e-06	0.696075	0.0131341	0.790098	114406
207	0P_0p1AM	0.03	0.255722	0P	0	0.00165	0.1	PRESHEAR	33	2500.31	19.4923	0.0729432	19.6889	0.0078746
208	0P_0p1AM	0.03	0.255722	0P	0	0.00165	0.1	SHEAR	34	75.0051	4.11772	0.0255301	4.25627	0.0567464
209	0P_0p1AM	0.03	0.255722	0P	0	0.00165	0.1	POSTSHEAR	35	-3.1601e-05	0.731121	0.0115772	0.845718	-26762.4
210	0P_0p1AM	0.03	0.255722	0P	0	0.00165	0.1	PRESHEAR	36	2500.31	19.4188	0.0745013	19.6187	0.00784651
211	0P_0p1AM	0.03	0.255722	0P	0	0.00165	0.1	SHEAR	37	50.0051	3.70078	0.0170269	3.83168	0.0766257
212	0P_0p1AM	0.03	0.255722	0P	0	0.00165	0.1	POSTSHEAR	38	-1.14361e-05	0.717134	0.0183046	0.84746	-74103.7
213	0P_0p1AM	0.03	0.255722	0P	0	0.00165	0.1	PRESHEAR	39	2500.31	19.349	0.0692505	19.5135	0.00780444
214	0P_0p1AM	0.03	0.255722	0P	0	0.00165	0.1	SHEAR	4	2250.26	19.0711	0.0660798	19.2221	0.00854219
215	0P_0p1AM	0.03	0.255722	0P	0	0.00165	0.1	SHEAR	40	25.0021	3.20194	0.018201	3.30814	0.132315
216	0P_0p1AM	0.03	0.255722	0P	0	0.00165	0.1	POSTSHEAR	41	3.95715e-05	0.857029	0.0205091	0.947407	23941.6
217	0P_0p1AM	0.03	0.255722	0P	0	0.00165	0.1	PRESHEAR	42	2500.29	19.302	0.0767429	19.4173	0.00776605
218	0P_0p1AM	0.03	0.255722	0P	0	0.00165	0.1	SHEAR	43	10.0024	2.38767	0.0111965	2.71754	0.271689
219	0P_0p1AM	0.03	0.255722	0P	0	0.00165	0.1	POSTSHEAR	44	5.21153e-06	0.798838	0.0120338	0.89852	172410
220	0P_0p1AM	0.03	0.255722	0P	0	0.00165	0.1	PRESHEAR	45	2500.31	19.284	0.0722747	19.4214	0.0077676
221	0P_0p1AM	0.03	0.255722	0P	0	0.00165	0.1	SHEAR	46	0.999286	0.98656	0.0180711	1.36916	1.37014
222	0P_0p1AM	0.03	0.255722	0P	0	0.00165	0.1	POSTSHEAR	47	-1.05931e-05	0.576295	0.015143	0.632451	-59703.8
223	0P_0p1AM	0.03	0.255722	0P	0	0.00165	0.1	PRESHEAR	48	2500.29	19.1143	0.0835655	19.2533	0.0077004
224	0P_0p1AM	0.03	0.255722	0P	0	0.00165	0.1	POSTSHEAR	5	1.57942e-05	0.389971	0.0172848	0.439635	27835.3
225	0P_0p1AM	0.03	0.255722	0P	0	0.00165	0.1	PRESHEAR	6	2500.29	20.2826	0.0787232	20.4828	0.00819218
226	0P_0p1AM	0.03	0.255722	0P	0	0.00165	0.1	SHEAR	7	2000.25	17.5833	0.0504804	17.7248	0.00886133
227	0P_0p1AM	0.03	0.255722	0P	0	0.00165	0.1	POSTSHEAR	8	9.42737e-06	0.385297	0.0177726	0.428202	45421.1
228	0P_0p1AM	0.03	0.255722	0P	0	0.00165	0.1	PRESHEAR	9	2500.3	20.1655	0.0810841	20.3749	0.00814897
0	0P_02p5AM	0.03	0.255722	0P	0	0.00165	2.5	PRESHEAR	0	2500.3	15.9316	0.0355331	15.9924	0.0063962
1	0P_02p5AM	0.03	0.255722	0P	0	0.00165	2.5	SHEAR	1	2500.29	15.9244	0.0377603	16.0265	0.00640984
2	0P_02p5AM	0.03	0.255722	0P	0	0.00165	2.5	SHEAR	10	1750.21	12.2982	0.0211893	12.3627	0.00706353
3	0P_02p5AM	0.03	0.255722	0P	0	0.00165	2.5	POSTSHEAR	11	1.23301e-05	0.0107566	0.0154205	0.081919	6643.83
4	0P_02p5AM	0.03	0.255722	0P	0	0.00165	2.5	PRESHEAR	12	2500.31	15.8384	0.0383505	15.919	0.00636681
5	0P_02p5AM	0.03	0.255722	0P	0	0.00165	2.5	SHEAR	13	1500.18	11.0657	0.0178488	11.1144	0.00740866
6	0P_02p5AM	0.03	0.255722	0P	0	0.00165	2.5	POSTSHEAR	14	-2.64812e-05	0.0317057	0.0146901	0.0720514	-2720.85
7	0P_02p5AM	0.03	0.255722	0P	0	0.00165	2.5	PRESHEAR	15	2500.3	15.8021	0.0379511	15.9032	0.00636053
8	0P_02p5AM	0.03	0.255722	0P	0	0.00165	2.5	SHEAR	16	1250.15	9.81184	0.0109711	9.85527	0.0078833
9	0P_02p5AM	0.03	0.255722	0P	0	0.00165	2.5	POSTSHEAR	17	1.69527e-05	0.0373029	0.0136139	0.0821703	4847.02
10	0P_02p5AM	0.03	0.255722	0P	0	0.00165	2.5	PRESHEAR	18	2500.3	15.7954	0.0328876	15.8724	0.0063482
11	0P_02p5AM	0.03	0.255722	0P	0	0.00165	2.5	SHEAR	19	1000.13	8.50138	0.0165877	8.557	0.00855593
12	0P_02p5AM	0.03	0.255722	0P	0	0.00165	2.5	POSTSHEAR	2	-1.97943e-05	-0.0446381	0.0198691	0.00202258	-102.18
13	0P_02p5AM	0.03	0.255722	0P	0	0.00165	2.5	POSTSHEAR	20	2.41943e-05	0.0489986	0.0144405	0.126446	5226.28
14	0P_02p5AM	0.03	0.255722	0P	0	0.00165	2.5	PRESHEAR	21	2500.3	15.772	0.033543	15.8548	0.00634116
15	0P_02p5AM	0.03	0.255722	0P	0	0.00165	2.5	SHEAR	22	750.096	7.1149	0.0215352	7.22704	0.00963482
16	0P_02p5AM	0.03	0.255722	0P	0	0.00165	2.5	POSTSHEAR	23	-1.97844e-05	0.0559186	0.0152258	0.124905	-6313.31
17	0P_02p5AM	0.03	0.255722	0P	0	0.00165	2.5	PRESHEAR	24	2500.29	15.7791	0.0351346	15.8524	0.00634023
18	0P_02p5AM	0.03	0.255722	0P	0	0.00165	2.5	SHEAR	25	500.056	5.68266	0.0187961	5.77138	0.0115415
19	0P_02p5AM	0.03	0.255722	0P	0	0.00165	2.5	POSTSHEAR	26	-1.91019e-05	0.118421	0.0125295	0.168754	-8834.39
20	0P_02p5AM	0.03	0.255722	0P	0	0.00165	2.5	PRESHEAR	27	2500.3	15.7695	0.039713	15.8547	0.00634112
21	0P_02p5AM	0.03	0.255722	0P	0	0.00165	2.5	SHEAR	28	250.033	4.04483	0.0144234	4.15731	0.0166271
22	0P_02p5AM	0.03	0.255722	0P	0	0.00165	2.5	POSTSHEAR	29	4.44661e-05	0.175977	0.0169813	0.218484	4913.5
23	0P_02p5AM	0.03	0.255722	0P	0	0.00165	2.5	PRESHEAR	3	2500.31	15.9084	0.0373217	15.9867	0.0063939
24	0P_02p5AM	0.03	0.255722	0P	0	0.00165	2.5	PRESHEAR	30	2500.31	15.7393	0.0337015	15.8172	0.0063261
25	0P_02p5AM	0.03	0.255722	0P	0	0.00165	2.5	SHEAR	31	100.015	2.83409	0.0133005	2.95207	0.0295163
26	0P_02p5AM	0.03	0.255722	0P	0	0.00165	2.5	POSTSHEAR	32	7.45702e-07	0.264339	0.019606	0.316126	423930
27	0P_02p5AM	0.03	0.255722	0P	0	0.00165	2.5	PRESHEAR	33	2500.29	15.7019	0.033594	15.7751	0.00630933
28	0P_02p5AM	0.03	0.255722	0P	0	0.00165	2.5	SHEAR	34	75.0089	2.57002	0.0239489	2.67972	0.0357253
29	0P_02p5AM	0.03	0.255722	0P	0	0.00165	2.5	POSTSHEAR	35	5.77328e-06	0.286501	0.0118561	0.343208	59447.6
30	0P_02p5AM	0.03	0.255722	0P	0	0.00165	2.5	PRESHEAR	36	2500.31	15.6876	0.0342019	15.7642	0.00630493
31	0P_02p5AM	0.03	0.255722	0P	0	0.00165	2.5	SHEAR	37	50.0056	2.29326	0.0131376	2.43631	0.0487208
32	0P_02p5AM	0.03	0.255722	0P	0	0.00165	2.5	POSTSHEAR	38	-4.13425e-05	0.331447	0.0136728	0.382807	-9259.42
33	0P_02p5AM	0.03	0.255722	0P	0	0.00165	2.5	PRESHEAR	39	2500.29	15.6644	0.0341237	15.7451	0.00629729
34	0P_02p5AM	0.03	0.255722	0P	0	0.00165	2.5	SHEAR	4	2250.27	14.7205	0.035376	14.7951	0.00657484
35	0P_02p5AM	0.03	0.255722	0P	0	0.00165	2.5	SHEAR	40	25.0035	1.97615	0.0128854	2.08156	0.0832508
36	0P_02p5AM	0.03	0.255722	0P	0	0.00165	2.5	POSTSHEAR	41	-3.83429e-05	0.428299	0.0198618	0.480948	-12543.4
37	0P_02p5AM	0.03	0.255722	0P	0	0.00165	2.5	PRESHEAR	42	2500.3	15.6278	0.035154	15.7052	0.00628135
38	0P_02p5AM	0.03	0.255722	0P	0	0.00165	2.5	SHEAR	43	10.0014	1.61649	0.0193718	1.72486	0.172462
39	0P_02p5AM	0.03	0.255722	0P	0	0.00165	2.5	POSTSHEAR	44	2.03166e-05	0.489622	0.0157209	0.567645	27939.9
40	0P_02p5AM	0.03	0.255722	0P	0	0.00165	2.5	PRESHEAR	45	2500.29	15.6038	0.0324751	15.6694	0.00626704
41	0P_02p5AM	0.03	0.255722	0P	0	0.00165	2.5	SHEAR	46	1.00064	0.506306	0.0163545	0.762308	0.761822
42	0P_02p5AM	0.03	0.255722	0P	0	0.00165	2.5	POSTSHEAR	47	-1.0595e-05	0.254431	0.0128696	0.338398	-31939.5
43	0P_02p5AM	0.03	0.255722	0P	0	0.00165	2.5	PRESHEAR	48	2500.3	15.5962	0.0346906	15.6709	0.00626763
44	0P_02p5AM	0.03	0.255722	0P	0	0.00165	2.5	POSTSHEAR	5	1.98663e-05	-0.0243346	0.0193394	0.0406362	2045.48
45	0P_02p5AM	0.03	0.255722	0P	0	0.00165	2.5	PRESHEAR	6	2500.3	15.8876	0.0348421	15.9703	0.00638734
46	0P_02p5AM	0.03	0.255722	0P	0	0.00165	2.5	SHEAR	7	2000.24	13.5108	0.0350464	13.5877	0.00679304
47	0P_02p5AM	0.03	0.255722	0P	0	0.00165	2.5	POSTSHEAR	8	-4.54152e-05	0.0127216	0.0135327	0.0673619	-1483.25
48	0P_02p5AM	0.03	0.255722	0P	0	0.00165	2.5	PRESHEAR	9	2500.3	15.8623	0.0379857	15.9361	0.00637367
49	0P_05AM	0.03	0.255722	0P	0	0.00165	5	PRESHEAR	0	2500.3	12.0622	0.0429544	12.1648	0.00486533
50	0P_05AM	0.03	0.255722	0P	0	0.00165	5	SHEAR	1	2500.3	12.0402	0.0391964	12.1501	0.00485945
51	0P_05AM	0.03	0.255722	0P	0	0.00165	5	SHEAR	10	1750.21	8.93706	0.0160392	8.98134	0.00513157
52	0P_05AM	0.03	0.255722	0P	0	0.00165	5	POSTSHEAR	11	-1.31738e-05	-0.0702276	0.00883042	-0.0294542	2235.81
53	0P_05AM	0.03	0.255722	0P	0	0.00165	5	PRESHEAR	12	2500.3	11.9007	0.0443025	12.0069	0.00480217
54	0P_05AM	0.03	0.255722	0P	0	0.00165	5	SHEAR	13	1500.18	7.85872	0.0100233	7.90447	0.00526903
55	0P_05AM	0.03	0.255722	0P	0	0.00165	5	POSTSHEAR	14	-1.15194e-05	-0.0785242	0.0106201	-0.0310293	2693.65
56	0P_05AM	0.03	0.255722	0P	0	0.00165	5	PRESHEAR	15	2500.3	11.8504	0.044091	11.9657	0.00478572
57	0P_05AM	0.03	0.255722	0P	0	0.00165	5	SHEAR	16	1250.15	6.80175	0.0114867	6.8336	0.00546621
58	0P_05AM	0.03	0.255722	0P	0	0.00165	5	POSTSHEAR	17	4.68756e-06	-0.0753925	0.0111507	-0.0377906	-8061.9
59	0P_05AM	0.03	0.255722	0P	0	0.00165	5	PRESHEAR	18	2500.31	11.8226	0.0443057	11.9294	0.00477118
60	0P_05AM	0.03	0.255722	0P	0	0.00165	5	SHEAR	19	1000.12	5.68156	0.0191284	5.75995	0.00575928
61	0P_05AM	0.03	0.255722	0P	0	0.00165	5	POSTSHEAR	2	-1.70459e-05	-0.0451646	0.00831765	0.00202328	-118.696
62	0P_05AM	0.03	0.255722	0P	0	0.00165	5	POSTSHEAR	20	7.65355e-05	-0.103437	0.0138377	-0.0552564	-721.97
63	0P_05AM	0.03	0.255722	0P	0	0.00165	5	PRESHEAR	21	2500.3	11.7988	0.0425724	11.8891	0.00475509
64	0P_05AM	0.03	0.255722	0P	0	0.00165	5	SHEAR	22	750.093	4.55645	0.0206356	4.67144	0.00622782
65	0P_05AM	0.03	0.255722	0P	0	0.00165	5	POSTSHEAR	23	-8.32179e-06	-0.089302	0.0129015	-0.0546757	6570.19
66	0P_05AM	0.03	0.255722	0P	0	0.00165	5	PRESHEAR	24	2500.31	11.7767	0.0434679	11.8631	0.00474466
67	0P_05AM	0.03	0.255722	0P	0	0.00165	5	SHEAR	25	500.053	3.43887	0.0198889	3.48771	0.00697468
68	0P_05AM	0.03	0.255722	0P	0	0.00165	5	POSTSHEAR	26	2.37268e-05	-0.13217	0.00806602	-0.0592759	-2498.26
69	0P_05AM	0.03	0.255722	0P	0	0.00165	5	PRESHEAR	27	2500.31	11.7332	0.0387949	11.8117	0.0047241
70	0P_05AM	0.03	0.255722	0P	0	0.00165	5	SHEAR	28	250.03	2.17244	0.0152693	2.2206	0.00888135
71	0P_05AM	0.03	0.255722	0P	0	0.00165	5	POSTSHEAR	29	-2.0198e-05	-0.123605	0.00759559	-0.078814	3902.08
72	0P_05AM	0.03	0.255722	0P	0	0.00165	5	PRESHEAR	3	2500.29	11.9996	0.0438462	12.103	0.00484065
73	0P_05AM	0.03	0.255722	0P	0	0.00165	5	PRESHEAR	30	2500.3	11.7002	0.0393482	11.7894	0.00471518
74	0P_05AM	0.03	0.255722	0P	0	0.00165	5	SHEAR	31	100.01	1.30286	0.0179229	1.33836	0.0133822
75	0P_05AM	0.03	0.255722	0P	0	0.00165	5	POSTSHEAR	32	-3.46714e-05	-0.127305	0.0131227	-0.0798361	2302.65
76	0P_05AM	0.03	0.255722	0P	0	0.00165	5	PRESHEAR	33	2500.29	11.6587	0.0401358	11.7476	0.0046985
77	0P_05AM	0.03	0.255722	0P	0	0.00165	5	SHEAR	34	75.0109	1.08934	0.0121825	1.1501	0.0153324
78	0P_05AM	0.03	0.255722	0P	0	0.00165	5	POSTSHEAR	35	1.40745e-05	-0.155532	0.00915362	-0.0995978	-7076.48
79	0P_05AM	0.03	0.255722	0P	0	0.00165	5	PRESHEAR	36	2500.32	11.6584	0.0415163	11.7463	0.00469793
80	0P_05AM	0.03	0.255722	0P	0	0.00165	5	SHEAR	37	50.0085	0.9045	0.0116697	0.948064	0.0189581
81	0P_05AM	0.03	0.255722	0P	0	0.00165	5	POSTSHEAR	38	2.17941e-05	-0.139892	0.0183334	-0.0923951	-4239.45
82	0P_05AM	0.03	0.255722	0P	0	0.00165	5	PRESHEAR	39	2500.29	11.608	0.0391324	11.7207	0.00468774
83	0P_05AM	0.03	0.255722	0P	0	0.00165	5	SHEAR	4	2250.26	11.0163	0.0379063	11.0869	0.00492692
84	0P_05AM	0.03	0.255722	0P	0	0.00165	5	SHEAR	40	25.0022	0.672316	0.00998419	0.705404	0.0282137
85	0P_05AM	0.03	0.255722	0P	0	0.00165	5	POSTSHEAR	41	2.49836e-05	-0.127142	0.0106309	-0.0678013	-2713.83
86	0P_05AM	0.03	0.255722	0P	0	0.00165	5	PRESHEAR	42	2500.31	11.5955	0.0385837	11.6782	0.00467072
87	0P_05AM	0.03	0.255722	0P	0	0.00165	5	SHEAR	43	10.0013	0.442596	0.00665797	0.492695	0.049263
88	0P_05AM	0.03	0.255722	0P	0	0.00165	5	POSTSHEAR	44	-6.44854e-06	-0.135121	0.0072405	-0.077422	12006.1
89	0P_05AM	0.03	0.255722	0P	0	0.00165	5	PRESHEAR	45	2500.31	11.5528	0.0407551	11.6502	0.00465951
90	0P_05AM	0.03	0.255722	0P	0	0.00165	5	SHEAR	46	0.999356	-0.0327696	0.00794187	-0.00404852	-0.00405112
91	0P_05AM	0.03	0.255722	0P	0	0.00165	5	POSTSHEAR	47	5.67079e-05	-0.134246	0.0100612	-0.0981078	-1730.06
92	0P_05AM	0.03	0.255722	0P	0	0.00165	5	PRESHEAR	48	2500.3	11.5399	0.0355759	11.6131	0.00464466
93	0P_05AM	0.03	0.255722	0P	0	0.00165	5	POSTSHEAR	5	3.44201e-05	-0.0401983	0.00922797	0.00850673	247.144
94	0P_05AM	0.03	0.255722	0P	0	0.00165	5	PRESHEAR	6	2500.3	11.9937	0.0467028	12.0613	0.00482396
95	0P_05AM	0.03	0.255722	0P	0	0.00165	5	SHEAR	7	2000.24	9.96502	0.0285516	10.0299	0.00501435
96	0P_05AM	0.03	0.255722	0P	0	0.00165	5	POSTSHEAR	8	-4.69358e-05	-0.0537962	0.00994463	0.0142357	-303.301
97	0P_05AM	0.03	0.255722	0P	0	0.00165	5	PRESHEAR	9	2500.3	11.9469	0.0419084	12.0295	0.00481124
229	0P_10AM	0.03	0.255722	0P	0	0.00165	10	PRESHEAR	0	2500.3	9.14081	0.0360275	9.24214	0.00369641
230	0P_10AM	0.03	0.255722	0P	0	0.00165	10	SHEAR	1	2500.29	9.1391	0.0371358	9.21726	0.00368647
231	0P_10AM	0.03	0.255722	0P	0	0.00165	10	SHEAR	10	1750.22	6.53116	0.0186759	6.56931	0.00375343
232	0P_10AM	0.03	0.255722	0P	0	0.00165	10	POSTSHEAR	11	3.52702e-05	-0.0204604	0.0115163	0.0118528	336.057
233	0P_10AM	0.03	0.255722	0P	0	0.00165	10	PRESHEAR	12	2500.28	9.05275	0.0354249	9.1494	0.00365935
234	0P_10AM	0.03	0.255722	0P	0	0.00165	10	SHEAR	13	1500.19	5.69496	0.0125447	5.72254	0.00381454
235	0P_10AM	0.03	0.255722	0P	0	0.00165	10	POSTSHEAR	14	-4.32928e-05	-0.0249938	0.0117588	0.018118	-418.499
236	0P_10AM	0.03	0.255722	0P	0	0.00165	10	PRESHEAR	15	2500.29	9.06197	0.0368831	9.15525	0.00366167
237	0P_10AM	0.03	0.255722	0P	0	0.00165	10	SHEAR	16	1250.15	4.78559	0.00909792	4.84642	0.00387668
238	0P_10AM	0.03	0.255722	0P	0	0.00165	10	POSTSHEAR	17	-3.79398e-05	-0.0168774	0.0189068	0.0363529	-958.174
239	0P_10AM	0.03	0.255722	0P	0	0.00165	10	PRESHEAR	18	2500.3	9.04997	0.0392233	9.12971	0.00365144
240	0P_10AM	0.03	0.255722	0P	0	0.00165	10	SHEAR	19	1000.12	3.9474	0.0148838	3.98331	0.00398284
241	0P_10AM	0.03	0.255722	0P	0	0.00165	10	POSTSHEAR	2	-2.2484e-05	-0.0343057	0.01536	0.0266534	-1185.44
242	0P_10AM	0.03	0.255722	0P	0	0.00165	10	POSTSHEAR	20	6.6218e-06	-0.0297715	0.0119781	-0.00743666	-1123.06
243	0P_10AM	0.03	0.255722	0P	0	0.00165	10	PRESHEAR	21	2500.29	9.04424	0.0352265	9.15284	0.00366071
244	0P_10AM	0.03	0.255722	0P	0	0.00165	10	SHEAR	22	750.085	3.07622	0.017056	3.13508	0.00417963
245	0P_10AM	0.03	0.255722	0P	0	0.00165	10	POSTSHEAR	23	-1.54802e-05	-0.0105731	0.0194957	0.0561894	-3629.77
246	0P_10AM	0.03	0.255722	0P	0	0.00165	10	PRESHEAR	24	2500.3	9.05085	0.0406142	9.14414	0.00365722
247	0P_10AM	0.03	0.255722	0P	0	0.00165	10	SHEAR	25	500.057	2.1907	0.0177913	2.24356	0.0044866
248	0P_10AM	0.03	0.255722	0P	0	0.00165	10	POSTSHEAR	26	2.54879e-05	-0.00895329	0.0179366	0.0346001	1357.51
249	0P_10AM	0.03	0.255722	0P	0	0.00165	10	PRESHEAR	27	2500.28	9.04406	0.0380525	9.1438	0.00365711
250	0P_10AM	0.03	0.255722	0P	0	0.00165	10	SHEAR	28	250.027	1.27835	0.0197304	1.32945	0.00531725
251	0P_10AM	0.03	0.255722	0P	0	0.00165	10	POSTSHEAR	29	-2.53251e-06	-0.0143043	0.0184688	0.0317874	-12551.7
252	0P_10AM	0.03	0.255722	0P	0	0.00165	10	PRESHEAR	3	2500.29	9.13042	0.0379155	9.22477	0.00368947
253	0P_10AM	0.03	0.255722	0P	0	0.00165	10	PRESHEAR	30	2500.32	9.05622	0.0372206	9.16437	0.00366528
254	0P_10AM	0.03	0.255722	0P	0	0.00165	10	SHEAR	31	100.008	0.667505	0.0230863	0.711317	0.00711259
255	0P_10AM	0.03	0.255722	0P	0	0.00165	10	POSTSHEAR	32	-2.22828e-05	-0.00478997	0.0109161	0.0351152	-1575.89
256	0P_10AM	0.03	0.255722	0P	0	0.00165	10	PRESHEAR	33	2500.29	9.04703	0.035483	9.1434	0.00365693
257	0P_10AM	0.03	0.255722	0P	0	0.00165	10	SHEAR	34	75.0064	0.566675	0.0115866	0.612444	0.00816522
258	0P_10AM	0.03	0.255722	0P	0	0.00165	10	POSTSHEAR	35	3.37509e-05	-0.031443	0.00925229	0.0243715	722.1
259	0P_10AM	0.03	0.255722	0P	0	0.00165	10	PRESHEAR	36	2500.31	9.04055	0.041953	9.14515	0.00365761
260	0P_10AM	0.03	0.255722	0P	0	0.00165	10	SHEAR	37	50.0078	0.449494	0.0127603	0.473307	0.00946468
261	0P_10AM	0.03	0.255722	0P	0	0.00165	10	POSTSHEAR	38	3.75658e-05	-0.0452381	0.0122024	0.0192503	512.442
262	0P_10AM	0.03	0.255722	0P	0	0.00165	10	PRESHEAR	39	2500.31	9.06077	0.0418404	9.13757	0.00365457
263	0P_10AM	0.03	0.255722	0P	0	0.00165	10	SHEAR	4	2250.25	8.27162	0.0327386	8.35869	0.00371456
264	0P_10AM	0.03	0.255722	0P	0	0.00165	10	SHEAR	40	25.0045	0.314747	0.0106531	0.33853	0.0135387
265	0P_10AM	0.03	0.255722	0P	0	0.00165	10	POSTSHEAR	41	-3.70197e-05	-0.0179843	0.0127713	0.0335041	-905.034
266	0P_10AM	0.03	0.255722	0P	0	0.00165	10	PRESHEAR	42	2500.3	9.05793	0.0409572	9.14916	0.00365923
267	0P_10AM	0.03	0.255722	0P	0	0.00165	10	SHEAR	43	10	0.206133	0.0158543	0.241499	0.0241499
268	0P_10AM	0.03	0.255722	0P	0	0.00165	10	POSTSHEAR	44	1.86299e-05	-0.0136451	0.0121207	0.027832	1493.94
269	0P_10AM	0.03	0.255722	0P	0	0.00165	10	PRESHEAR	45	2500.28	9.01968	0.0423198	9.1175	0.00364659
270	0P_10AM	0.03	0.255722	0P	0	0.00165	10	SHEAR	46	1.00048	0.00699366	0.0137556	0.059595	0.0595663
271	0P_10AM	0.03	0.255722	0P	0	0.00165	10	POSTSHEAR	47	-1.87505e-07	-0.0150186	0.0147148	0.0187262	-99870.4
272	0P_10AM	0.03	0.255722	0P	0	0.00165	10	PRESHEAR	48	2500.3	9.02183	0.0404947	9.09921	0.00363924
273	0P_10AM	0.03	0.255722	0P	0	0.00165	10	POSTSHEAR	5	-5.93951e-05	-0.0121228	0.00987536	0.0294453	-495.754
274	0P_10AM	0.03	0.255722	0P	0	0.00165	10	PRESHEAR	6	2500.31	9.07601	0.039509	9.17285	0.00366869
275	0P_10AM	0.03	0.255722	0P	0	0.00165	10	SHEAR	7	2000.24	7.40241	0.0254925	7.46598	0.00373255
276	0P_10AM	0.03	0.255722	0P	0	0.00165	10	POSTSHEAR	8	3.77678e-06	0.0125165	0.00963936	0.0374559	9917.42
277	0P_10AM	0.03	0.255722	0P	0	0.00165	10	PRESHEAR	9	2500.29	9.08962	0.0389355	9.17571	0.00366986
278	0P_20AM	0.03	0.255722	0P	0	0.00165	20	PRESHEAR	0	2500.3	6.45854	0.0403027	6.5514	0.00262025
279	0P_20AM	0.03	0.255722	0P	0	0.00165	20	SHEAR	1	2500.31	6.46732	0.0405273	6.56056	0.0026239
280	0P_20AM	0.03	0.255722	0P	0	0.00165	20	SHEAR	10	1750.21	4.5336	0.0198701	4.57618	0.00261464
281	0P_20AM	0.03	0.255722	0P	0	0.00165	20	POSTSHEAR	11	3.11317e-05	0.0154608	0.0129214	0.0739425	2375.15
282	0P_20AM	0.03	0.255722	0P	0	0.00165	20	PRESHEAR	12	2500.31	6.51565	0.0408648	6.58374	0.00263318
283	0P_20AM	0.03	0.255722	0P	0	0.00165	20	SHEAR	13	1500.17	3.89632	0.00897064	3.95046	0.00263335
284	0P_20AM	0.03	0.255722	0P	0	0.00165	20	POSTSHEAR	14	5.98038e-06	0.00806726	0.0112996	0.0552119	9232.18
285	0P_20AM	0.03	0.255722	0P	0	0.00165	20	PRESHEAR	15	2500.29	6.49716	0.0382107	6.56856	0.00262712
286	0P_20AM	0.03	0.255722	0P	0	0.00165	20	SHEAR	16	1250.16	3.262	0.0158631	3.31637	0.00265277
287	0P_20AM	0.03	0.255722	0P	0	0.00165	20	POSTSHEAR	17	2.15856e-05	0.0255012	0.0158353	0.0654391	3031.6
288	0P_20AM	0.03	0.255722	0P	0	0.00165	20	PRESHEAR	18	2500.31	6.48677	0.0406903	6.57655	0.0026303
289	0P_20AM	0.03	0.255722	0P	0	0.00165	20	SHEAR	19	1000.12	2.61748	0.0158784	2.68566	0.00268534
290	0P_20AM	0.03	0.255722	0P	0	0.00165	20	POSTSHEAR	2	-2.68513e-05	-0.00471912	0.0101834	0.0290787	-1082.95
291	0P_20AM	0.03	0.255722	0P	0	0.00165	20	POSTSHEAR	20	6.77845e-07	0.0276284	0.0148936	0.0580272	85605.4
292	0P_20AM	0.03	0.255722	0P	0	0.00165	20	PRESHEAR	21	2500.31	6.49389	0.0376312	6.58828	0.00263499
293	0P_20AM	0.03	0.255722	0P	0	0.00165	20	SHEAR	22	750.091	2.00547	0.0226601	2.06682	0.00275543
294	0P_20AM	0.03	0.255722	0P	0	0.00165	20	POSTSHEAR	23	7.57473e-05	0.0153042	0.0162498	0.0813268	1073.66
295	0P_20AM	0.03	0.255722	0P	0	0.00165	20	PRESHEAR	24	2500.3	6.49944	0.0394292	6.60668	0.00264235
296	0P_20AM	0.03	0.255722	0P	0	0.00165	20	SHEAR	25	500.063	1.3724	0.0178212	1.43095	0.00286153
297	0P_20AM	0.03	0.255722	0P	0	0.00165	20	POSTSHEAR	26	-2.73108e-07	0.020747	0.0174824	0.0904296	-331113
298	0P_20AM	0.03	0.255722	0P	0	0.00165	20	PRESHEAR	27	2500.3	6.52058	0.0416691	6.59906	0.0026393
299	0P_20AM	0.03	0.255722	0P	0	0.00165	20	SHEAR	28	250.029	0.762643	0.0175405	0.81154	0.00324578
300	0P_20AM	0.03	0.255722	0P	0	0.00165	20	POSTSHEAR	29	8.75929e-05	0.0497948	0.0116708	0.0915632	1045.33
301	0P_20AM	0.03	0.255722	0P	0	0.00165	20	PRESHEAR	3	2500.29	6.47231	0.0365103	6.58259	0.00263273
302	0P_20AM	0.03	0.255722	0P	0	0.00165	20	PRESHEAR	30	2500.31	6.52994	0.0425087	6.62891	0.00265124
303	0P_20AM	0.03	0.255722	0P	0	0.00165	20	SHEAR	31	100.016	0.338125	0.0152814	0.420012	0.00419946
304	0P_20AM	0.03	0.255722	0P	0	0.00165	20	POSTSHEAR	32	-4.91085e-05	0.0153351	0.0187366	0.0750695	-1528.65
305	0P_20AM	0.03	0.255722	0P	0	0.00165	20	PRESHEAR	33	2500.3	6.50916	0.0409831	6.62317	0.00264895
306	0P_20AM	0.03	0.255722	0P	0	0.00165	20	SHEAR	34	75.0105	0.293431	0.0169512	0.350122	0.00466763
307	0P_20AM	0.03	0.255722	0P	0	0.00165	20	POSTSHEAR	35	3.34437e-06	0.0676021	0.00962821	0.121108	36212.6
308	0P_20AM	0.03	0.255722	0P	0	0.00165	20	PRESHEAR	36	2500.31	6.53552	0.0391778	6.66071	0.00266396
309	0P_20AM	0.03	0.255722	0P	0	0.00165	20	SHEAR	37	50.0065	0.23934	0.0139283	0.279651	0.00559229
310	0P_20AM	0.03	0.255722	0P	0	0.00165	20	POSTSHEAR	38	1.39267e-05	0.0527993	0.0154137	0.113715	8165.24
311	0P_20AM	0.03	0.255722	0P	0	0.00165	20	PRESHEAR	39	2500.32	6.49928	0.0413079	6.60774	0.00264276
312	0P_20AM	0.03	0.255722	0P	0	0.00165	20	SHEAR	4	2250.27	5.82016	0.0378372	5.90802	0.00262547
313	0P_20AM	0.03	0.255722	0P	0	0.00165	20	SHEAR	40	25.0007	0.14272	0.0148729	0.187021	0.00748065
314	0P_20AM	0.03	0.255722	0P	0	0.00165	20	POSTSHEAR	41	3.14705e-05	0.0673983	0.012903	0.10804	3433.06
315	0P_20AM	0.03	0.255722	0P	0	0.00165	20	PRESHEAR	42	2500.3	6.52422	0.0429445	6.62717	0.00265055
316	0P_20AM	0.03	0.255722	0P	0	0.00165	20	SHEAR	43	10.0007	0.0780755	0.0208833	0.134182	0.0134172
317	0P_20AM	0.03	0.255722	0P	0	0.00165	20	POSTSHEAR	44	-7.65866e-05	0.0669956	0.0203485	0.117142	-1529.54
318	0P_20AM	0.03	0.255722	0P	0	0.00165	20	PRESHEAR	45	2500.3	6.52947	0.0400047	6.61812	0.00264693
319	0P_20AM	0.03	0.255722	0P	0	0.00165	20	SHEAR	46	0.999992	0.0568248	0.00826457	0.133051	0.133052
320	0P_20AM	0.03	0.255722	0P	0	0.00165	20	POSTSHEAR	47	7.82412e-06	0.0423384	0.0256092	0.102355	13082
321	0P_20AM	0.03	0.255722	0P	0	0.00165	20	PRESHEAR	48	2500.3	6.51706	0.0401993	6.61687	0.00264643
322	0P_20AM	0.03	0.255722	0P	0	0.00165	20	POSTSHEAR	5	-7.97039e-06	-0.0202173	0.0131881	0.0273708	-3434.06
323	0P_20AM	0.03	0.255722	0P	0	0.00165	20	PRESHEAR	6	2500.29	6.48129	0.03673	6.56784	0.00262683
324	0P_20AM	0.03	0.255722	0P	0	0.00165	20	SHEAR	7	2000.24	5.17857	0.0248682	5.23431	0.00261684
325	0P_20AM	0.03	0.255722	0P	0	0.00165	20	POSTSHEAR	8	1.67245e-05	-0.000489619	0.0107662	0.0705495	4218.34
326	0P_20AM	0.03	0.255722	0P	0	0.00165	20	PRESHEAR	9	2500.29	6.47384	0.0462434	6.5856	0.00263393
327	0P_35AM	0.03	0.255722	0P	0	0.00165	35	PRESHEAR	0	2500.3	7.33752	0.0138736	7.39386	0.00295718
328	0P_35AM	0.03	0.255722	0P	0	0.00165	35	SHEAR	1	2500.3	7.36817	0.0156117	7.41248	0.00296464
329	0P_35AM	0.03	0.255722	0P	0	0.00165	35	SHEAR	10	1750.21	4.93619	0.0111142	4.96326	0.00283581
330	0P_35AM	0.03	0.255722	0P	0	0.00165	35	POSTSHEAR	11	6.36086e-06	0.0445933	0.0162153	0.0874575	13749.3
331	0P_35AM	0.03	0.255722	0P	0	0.00165	35	PRESHEAR	12	2500.3	7.12014	0.0200736	7.16528	0.00286576
332	0P_35AM	0.03	0.255722	0P	0	0.00165	35	SHEAR	13	1500.17	4.32616	0.0134209	4.35561	0.0029034
333	0P_35AM	0.03	0.255722	0P	0	0.00165	35	POSTSHEAR	14	1.64736e-05	0.0442278	0.0111471	0.103923	6308.44
334	0P_35AM	0.03	0.255722	0P	0	0.00165	35	PRESHEAR	15	2500.3	7.19307	0.0154791	7.24095	0.00289603
335	0P_35AM	0.03	0.255722	0P	0	0.00165	35	SHEAR	16	1250.14	3.58368	0.0112638	3.63946	0.00291123
336	0P_35AM	0.03	0.255722	0P	0	0.00165	35	POSTSHEAR	17	2.13082e-05	0.0338383	0.0156285	0.0829312	3891.98
337	0P_35AM	0.03	0.255722	0P	0	0.00165	35	PRESHEAR	18	2500.3	7.33206	0.0132688	7.3856	0.00295388
338	0P_35AM	0.03	0.255722	0P	0	0.00165	35	SHEAR	19	1000.12	2.9024	0.00896051	2.95632	0.00295597
339	0P_35AM	0.03	0.255722	0P	0	0.00165	35	POSTSHEAR	2	5.77748e-06	-0.00363278	0.014407	0.0516183	8934.4
340	0P_35AM	0.03	0.255722	0P	0	0.00165	35	POSTSHEAR	20	3.28959e-05	0.0124238	0.0148565	0.0642577	1953.36
341	0P_35AM	0.03	0.255722	0P	0	0.00165	35	PRESHEAR	21	2500.3	7.44062	0.0183954	7.50488	0.00300159
342	0P_35AM	0.03	0.255722	0P	0	0.00165	35	SHEAR	22	750.094	2.21176	0.0172227	2.25215	0.00300249
343	0P_35AM	0.03	0.255722	0P	0	0.00165	35	POSTSHEAR	23	-5.98285e-06	0.0429375	0.011925	0.0898143	-15012
344	0P_35AM	0.03	0.255722	0P	0	0.00165	35	PRESHEAR	24	2500.31	7.43567	0.0208837	7.50937	0.00300338
345	0P_35AM	0.03	0.255722	0P	0	0.00165	35	SHEAR	25	500.065	1.47438	0.0122414	1.5395	0.0030786
346	0P_35AM	0.03	0.255722	0P	0	0.00165	35	POSTSHEAR	26	-5.34743e-05	0.0142406	0.0190101	0.0761843	-1424.69
347	0P_35AM	0.03	0.255722	0P	0	0.00165	35	PRESHEAR	27	2500.29	7.44586	0.0185498	7.48821	0.00299493
348	0P_35AM	0.03	0.255722	0P	0	0.00165	35	SHEAR	28	250.023	0.7561	0.0136466	0.824608	0.00329813
349	0P_35AM	0.03	0.255722	0P	0	0.00165	35	POSTSHEAR	29	-7.53357e-07	0.00558224	0.00873403	0.050107	-66511.6
350	0P_35AM	0.03	0.255722	0P	0	0.00165	35	PRESHEAR	3	2500.31	7.4408	0.017727	7.51364	0.00300508
351	0P_35AM	0.03	0.255722	0P	0	0.00165	35	PRESHEAR	30	2500.29	7.39401	0.0168043	7.45929	0.00298336
352	0P_35AM	0.03	0.255722	0P	0	0.00165	35	SHEAR	31	100.011	0.345004	0.0122396	0.405511	0.00405465
353	0P_35AM	0.03	0.255722	0P	0	0.00165	35	POSTSHEAR	32	-8.79523e-05	0.0282466	0.0122256	0.0853042	-969.892
354	0P_35AM	0.03	0.255722	0P	0	0.00165	35	PRESHEAR	33	2500.3	6.89436	0.0180312	6.98059	0.0027919
355	0P_35AM	0.03	0.255722	0P	0	0.00165	35	SHEAR	34	75.0104	0.273962	0.0104741	0.305017	0.00406633
356	0P_35AM	0.03	0.255722	0P	0	0.00165	35	POSTSHEAR	35	4.02529e-05	0.00638885	0.00897651	0.0585791	1455.28
357	0P_35AM	0.03	0.255722	0P	0	0.00165	35	PRESHEAR	36	2500.31	6.95486	0.0197536	7.07705	0.00283048
358	0P_35AM	0.03	0.255722	0P	0	0.00165	35	SHEAR	37	50.0067	0.199282	0.0137552	0.248812	0.00497559
359	0P_35AM	0.03	0.255722	0P	0	0.00165	35	POSTSHEAR	38	-9.88058e-06	-0.00909532	0.0118552	0.0546681	-5532.88
360	0P_35AM	0.03	0.255722	0P	0	0.00165	35	PRESHEAR	39	2500.31	6.94427	0.0143629	6.99457	0.00279748
361	0P_35AM	0.03	0.255722	0P	0	0.00165	35	SHEAR	4	2250.29	6.67504	0.011904	6.7152	0.00298415
362	0P_35AM	0.03	0.255722	0P	0	0.00165	35	SHEAR	40	25.001	0.104312	0.0171206	0.173866	0.00695436
363	0P_35AM	0.03	0.255722	0P	0	0.00165	35	POSTSHEAR	41	-4.47828e-05	0.0197242	0.022349	0.0722197	-1612.66
364	0P_35AM	0.03	0.255722	0P	0	0.00165	35	PRESHEAR	42	2500.31	7.29983	0.0240816	7.359	0.00294323
365	0P_35AM	0.03	0.255722	0P	0	0.00165	35	SHEAR	43	10.004	0.0777196	0.0112074	0.124501	0.0124451
366	0P_35AM	0.03	0.255722	0P	0	0.00165	35	POSTSHEAR	44	-2.43035e-05	0.0450889	0.0149752	0.125607	-5168.29
367	0P_35AM	0.03	0.255722	0P	0	0.00165	35	PRESHEAR	45	2500.3	7.35281	0.0131908	7.42649	0.00297024
368	0P_35AM	0.03	0.255722	0P	0	0.00165	35	SHEAR	46	1.00092	0.0203301	0.013769	0.10006	0.0999684
369	0P_35AM	0.03	0.255722	0P	0	0.00165	35	POSTSHEAR	47	-2.47548e-06	0.0497664	0.013123	0.108568	-43857.4
370	0P_35AM	0.03	0.255722	0P	0	0.00165	35	PRESHEAR	48	2500.31	7.34248	0.0154855	7.43408	0.00297327
371	0P_35AM	0.03	0.255722	0P	0	0.00165	35	POSTSHEAR	5	-6.849e-05	-0.0218982	0.0152346	0.0335109	-489.281
372	0P_35AM	0.03	0.255722	0P	0	0.00165	35	PRESHEAR	6	2500.29	7.07276	0.0188069	7.11732	0.0028466
373	0P_35AM	0.03	0.255722	0P	0	0.00165	35	SHEAR	7	2000.23	5.65235	0.0125402	5.68049	0.00283992
374	0P_35AM	0.03	0.255722	0P	0	0.00165	35	POSTSHEAR	8	9.83877e-06	0.0533484	0.0134807	0.0851534	8654.89
375	0P_35AM	0.03	0.255722	0P	0	0.00165	35	PRESHEAR	9	2500.3	7.04892	0.0192422	7.08244	0.00283264
376	0P_35NAM	0.03	0.255722	0P	0	0.00165	35	PRESHEAR	0	2500.3	8.23254	0.0679177	8.32778	0.00333071
377	0P_35NAM	0.03	0.255722	0P	0	0.00165	35	SHEAR	1	2500.3	8.21524	0.0970258	8.37155	0.00334822
378	0P_35NAM	0.03	0.255722	0P	0	0.00165	35	SHEAR	10	1750.21	5.61733	0.130775	6.04606	0.00345448
379	0P_35NAM	0.03	0.255722	0P	0	0.00165	35	POSTSHEAR	11	5.74375e-05	0.009934	0.0477914	0.228234	3973.6
380	0P_35NAM	0.03	0.255722	0P	0	0.00165	35	PRESHEAR	12	2500.29	7.89105	0.425979	8.52322	0.00340889
381	0P_35NAM	0.03	0.255722	0P	0	0.00165	35	SHEAR	13	1500.17	4.78261	0.0907554	5.12177	0.00341412
382	0P_35NAM	0.03	0.255722	0P	0	0.00165	35	POSTSHEAR	14	1.52159e-06	0.00904909	0.0575225	0.233891	153715
383	0P_35NAM	0.03	0.255722	0P	0	0.00165	35	PRESHEAR	15	2500.29	7.71948	0.430622	8.36817	0.00334688
384	0P_35NAM	0.03	0.255722	0P	0	0.00165	35	SHEAR	16	1250.16	3.9726	0.096461	4.2618	0.00340901
385	0P_35NAM	0.03	0.255722	0P	0	0.00165	35	POSTSHEAR	17	-4.55128e-05	0.0484166	0.0606925	0.265719	-5838.33
386	0P_35NAM	0.03	0.255722	0P	0	0.00165	35	PRESHEAR	18	2500.3	7.78434	0.497355	8.60311	0.00344083
387	0P_35NAM	0.03	0.255722	0P	0	0.00165	35	SHEAR	19	1000.12	3.30638	0.121628	3.6529	0.00365246
388	0P_35NAM	0.03	0.255722	0P	0	0.00165	35	POSTSHEAR	2	3.68483e-05	-0.00400756	0.014698	0.0527494	1431.53
389	0P_35NAM	0.03	0.255722	0P	0	0.00165	35	POSTSHEAR	20	3.35263e-05	0.0402542	0.0584073	0.287857	8586.01
390	0P_35NAM	0.03	0.255722	0P	0	0.00165	35	PRESHEAR	21	2500.3	7.66045	0.523544	8.42616	0.00337006
391	0P_35NAM	0.03	0.255722	0P	0	0.00165	35	SHEAR	22	750.096	2.54671	0.0958316	2.78269	0.00370978
392	0P_35NAM	0.03	0.255722	0P	0	0.00165	35	POSTSHEAR	23	3.83615e-05	0.0777956	0.0751422	0.319171	8320.09
393	0P_35NAM	0.03	0.255722	0P	0	0.00165	35	PRESHEAR	24	2500.29	7.77468	0.675949	8.75051	0.0034998
394	0P_35NAM	0.03	0.255722	0P	0	0.00165	35	SHEAR	25	500.061	1.82396	0.15751	2.81621	0.00563173
395	0P_35NAM	0.03	0.255722	0P	0	0.00165	35	POSTSHEAR	26	2.12926e-05	0.0905845	0.0936463	0.40887	19202.5
396	0P_35NAM	0.03	0.255722	0P	0	0.00165	35	PRESHEAR	27	2500.29	7.73534	0.594646	8.72612	0.00349004
397	0P_35NAM	0.03	0.255722	0P	0	0.00165	35	SHEAR	28	250.033	1.00271	0.0870278	1.34214	0.00536785
398	0P_35NAM	0.03	0.255722	0P	0	0.00165	35	POSTSHEAR	29	-1.7875e-05	0.126212	0.0558065	0.346999	-19412.5
399	0P_35NAM	0.03	0.255722	0P	0	0.00165	35	PRESHEAR	3	2500.29	8.31805	0.131189	8.50507	0.00340163
400	0P_35NAM	0.03	0.255722	0P	0	0.00165	35	PRESHEAR	30	2500.3	7.80629	0.610976	8.63973	0.00345548
401	0P_35NAM	0.03	0.255722	0P	0	0.00165	35	SHEAR	31	100.011	0.397555	0.0558949	0.720153	0.00720077
402	0P_35NAM	0.03	0.255722	0P	0	0.00165	35	POSTSHEAR	32	2.71892e-05	-0.0155922	0.0689213	0.215192	7914.61
403	0P_35NAM	0.03	0.255722	0P	0	0.00165	35	PRESHEAR	33	2500.31	7.73293	0.516481	8.55844	0.00342295
404	0P_35NAM	0.03	0.255722	0P	0	0.00165	35	SHEAR	34	75.0085	0.327929	0.0559035	0.541769	0.00722277
405	0P_35NAM	0.03	0.255722	0P	0	0.00165	35	POSTSHEAR	35	1.69629e-05	-0.00626364	0.0753678	0.354327	20888.4
406	0P_35NAM	0.03	0.255722	0P	0	0.00165	35	PRESHEAR	36	2500.31	7.60026	0.554952	8.48525	0.00339368
407	0P_35NAM	0.03	0.255722	0P	0	0.00165	35	SHEAR	37	50.0056	0.225589	0.0574819	0.444635	0.00889171
408	0P_35NAM	0.03	0.255722	0P	0	0.00165	35	POSTSHEAR	38	-3.41991e-05	-0.0101209	0.0505784	0.563994	-16491.5
409	0P_35NAM	0.03	0.255722	0P	0	0.00165	35	PRESHEAR	39	2500.29	7.70144	0.458528	8.41176	0.00336431
410	0P_35NAM	0.03	0.255722	0P	0	0.00165	35	SHEAR	4	2250.28	7.50997	0.124032	7.67403	0.00341025
411	0P_35NAM	0.03	0.255722	0P	0	0.00165	35	SHEAR	40	25.0022	0.140775	0.0526962	0.344101	0.0137629
412	0P_35NAM	0.03	0.255722	0P	0	0.00165	35	POSTSHEAR	41	3.46174e-05	0.0740844	0.0590178	0.303805	8776.07
413	0P_35NAM	0.03	0.255722	0P	0	0.00165	35	PRESHEAR	42	2500.3	7.80013	0.513433	8.57838	0.00343095
414	0P_35NAM	0.03	0.255722	0P	0	0.00165	35	SHEAR	43	10.0025	0.181869	0.0639305	0.361253	0.0361163
415	0P_35NAM	0.03	0.255722	0P	0	0.00165	35	POSTSHEAR	44	-8.60281e-05	0.076083	0.0301284	0.385	-4475.28
416	0P_35NAM	0.03	0.255722	0P	0	0.00165	35	PRESHEAR	45	2500.31	7.79436	0.403719	8.32613	0.00333004
417	0P_35NAM	0.03	0.255722	0P	0	0.00165	35	SHEAR	46	0.999859	0.139411	0.0708782	0.414595	0.414654
418	0P_35NAM	0.03	0.255722	0P	0	0.00165	35	POSTSHEAR	47	-1.79668e-05	0.274809	0.0834378	0.574152	-31956.3
419	0P_35NAM	0.03	0.255722	0P	0	0.00165	35	PRESHEAR	48	2500.3	7.66461	0.49108	8.40463	0.00336145
420	0P_35NAM	0.03	0.255722	0P	0	0.00165	35	POSTSHEAR	5	6.78269e-06	0.0374673	0.0153683	0.114089	16820.6
421	0P_35NAM	0.03	0.255722	0P	0	0.00165	35	PRESHEAR	6	2500.3	8.17746	0.185642	8.45565	0.00338185
422	0P_35NAM	0.03	0.255722	0P	0	0.00165	35	SHEAR	7	2000.23	6.56063	0.12253	6.78961	0.00339441
423	0P_35NAM	0.03	0.255722	0P	0	0.00165	35	POSTSHEAR	8	2.64777e-05	0.0266308	0.0334945	0.165151	6237.38
424	0P_35NAM	0.03	0.255722	0P	0	0.00165	35	PRESHEAR	9	2500.31	8.19427	0.341214	8.63159	0.00345221
425	0P_45AM	0.03	0.255722	0P	0	0.00165	45	PRESHEAR	0	2500.31	8.24537	0.0487049	8.33086	0.00333193
426	0P_45AM	0.03	0.255722	0P	0	0.00165	45	SHEAR	1	2500.3	8.30539	0.0304546	8.35528	0.00334171
427	0P_45AM	0.03	0.255722	0P	0	0.00165	45	SHEAR	10	1750.21	5.69555	0.0132887	5.769	0.00329617
428	0P_45AM	0.03	0.255722	0P	0	0.00165	45	POSTSHEAR	11	-3.12503e-05	-0.00910317	0.0157295	0.0473794	-1516.13
429	0P_45AM	0.03	0.255722	0P	0	0.00165	45	PRESHEAR	12	2500.28	8.32423	0.0324555	9.13902	0.0036552
430	0P_45AM	0.03	0.255722	0P	0	0.00165	45	SHEAR	13	1500.19	4.8324	0.0144974	4.9024	0.00326786
431	0P_45AM	0.03	0.255722	0P	0	0.00165	45	POSTSHEAR	14	-6.05348e-05	0.0225871	0.0111964	0.0643561	-1063.12
432	0P_45AM	0.03	0.255722	0P	0	0.00165	45	PRESHEAR	15	2500.29	8.34446	0.0397021	8.41492	0.00336557
433	0P_45AM	0.03	0.255722	0P	0	0.00165	45	SHEAR	16	1250.15	4.00287	0.0197456	4.09608	0.00327647
434	0P_45AM	0.03	0.255722	0P	0	0.00165	45	POSTSHEAR	17	-2.03553e-05	0.00742218	0.0265371	0.0660617	-3245.42
435	0P_45AM	0.03	0.255722	0P	0	0.00165	45	PRESHEAR	18	2500.3	8.31095	0.031374	8.77722	0.00351047
436	0P_45AM	0.03	0.255722	0P	0	0.00165	45	SHEAR	19	1000.12	3.18996	0.0154927	3.31289	0.0033125
437	0P_45AM	0.03	0.255722	0P	0	0.00165	45	POSTSHEAR	2	-2.67864e-06	-0.0070537	0.0284014	0.0441756	-16491.8
438	0P_45AM	0.03	0.255722	0P	0	0.00165	45	POSTSHEAR	20	5.37776e-05	0.0278122	0.0207013	0.0611745	1137.55
439	0P_45AM	0.03	0.255722	0P	0	0.00165	45	PRESHEAR	21	2500.3	8.34424	0.0354164	8.78748	0.00351458
440	0P_45AM	0.03	0.255722	0P	0	0.00165	45	SHEAR	22	750.086	2.47417	0.0182257	2.56997	0.00342624
441	0P_45AM	0.03	0.255722	0P	0	0.00165	45	POSTSHEAR	23	4.47999e-06	0.0330265	0.0138176	0.0631601	14098.3
442	0P_45AM	0.03	0.255722	0P	0	0.00165	45	PRESHEAR	24	2500.3	8.30927	0.0275535	8.72554	0.00348979
443	0P_45AM	0.03	0.255722	0P	0	0.00165	45	SHEAR	25	500.059	3.35587	0.0514029	3.44925	0.00689768
444	0P_45AM	0.03	0.255722	0P	0	0.00165	45	POSTSHEAR	26	-3.19879e-05	-0.00728569	0.0201023	0.0394817	-1234.27
445	0P_45AM	0.03	0.255722	0P	0	0.00165	45	PRESHEAR	27	2500.31	8.2698	0.0382571	8.33826	0.00333489
446	0P_45AM	0.03	0.255722	0P	0	0.00165	45	SHEAR	28	250.031	0.765265	0.0242465	0.928148	0.00371213
447	0P_45AM	0.03	0.255722	0P	0	0.00165	45	POSTSHEAR	29	-1.20485e-05	-0.00237018	0.0129955	0.0594894	-4937.51
448	0P_45AM	0.03	0.255722	0P	0	0.00165	45	PRESHEAR	3	2500.3	8.28062	0.0348738	8.60233	0.00344051
449	0P_45AM	0.03	0.255722	0P	0	0.00165	45	PRESHEAR	30	2500.31	8.2818	0.0311619	8.33485	0.00333353
450	0P_45AM	0.03	0.255722	0P	0	0.00165	45	SHEAR	31	100.013	0.248657	0.0105375	0.371133	0.00371086
451	0P_45AM	0.03	0.255722	0P	0	0.00165	45	POSTSHEAR	32	-1.51525e-05	0.025572	0.0127876	0.0773387	-5104.04
452	0P_45AM	0.03	0.255722	0P	0	0.00165	45	PRESHEAR	33	2500.3	8.24536	0.041304	8.31327	0.00332491
453	0P_45AM	0.03	0.255722	0P	0	0.00165	45	SHEAR	34	75.0079	0.167606	0.0121584	0.243285	0.00324346
454	0P_45AM	0.03	0.255722	0P	0	0.00165	45	POSTSHEAR	35	-6.22754e-06	0.0333229	0.0161631	0.0736912	-11833.1
455	0P_45AM	0.03	0.255722	0P	0	0.00165	45	PRESHEAR	36	2500.3	8.22632	0.0405407	8.29736	0.00331855
456	0P_45AM	0.03	0.255722	0P	0	0.00165	45	SHEAR	37	50.0069	0.134267	0.00832455	0.199513	0.00398971
457	0P_45AM	0.03	0.255722	0P	0	0.00165	45	POSTSHEAR	38	2.60602e-05	0.0218882	0.0165298	0.0638079	2448.48
458	0P_45AM	0.03	0.255722	0P	0	0.00165	45	PRESHEAR	39	2500.31	8.20314	0.043732	8.29794	0.00331876
459	0P_45AM	0.03	0.255722	0P	0	0.00165	45	SHEAR	4	2250.27	7.40392	0.0327551	7.49718	0.00333168
460	0P_45AM	0.03	0.255722	0P	0	0.00165	45	SHEAR	40	25.0021	0.0889882	0.0173423	0.128057	0.00512185
461	0P_45AM	0.03	0.255722	0P	0	0.00165	45	POSTSHEAR	41	-4.08842e-05	0.0137835	0.0158296	0.0689427	-1686.29
462	0P_45AM	0.03	0.255722	0P	0	0.00165	45	PRESHEAR	42	2500.3	8.20171	0.0345308	8.28317	0.00331287
463	0P_45AM	0.03	0.255722	0P	0	0.00165	45	SHEAR	43	10.0039	0.0372344	0.00919589	0.158797	0.0158735
464	0P_45AM	0.03	0.255722	0P	0	0.00165	45	POSTSHEAR	44	-5.23779e-05	0.0109321	0.020857	0.0525667	-1003.61
465	0P_45AM	0.03	0.255722	0P	0	0.00165	45	PRESHEAR	45	2500.32	8.2129	0.0380826	8.2877	0.00331466
466	0P_45AM	0.03	0.255722	0P	0	0.00165	45	SHEAR	46	1.00003	0.0491865	0.0127618	0.0945699	0.094567
467	0P_45AM	0.03	0.255722	0P	0	0.00165	45	POSTSHEAR	47	3.36036e-05	0.00129277	0.0153801	0.0681957	2029.42
468	0P_45AM	0.03	0.255722	0P	0	0.00165	45	PRESHEAR	48	2500.32	8.22303	0.0400143	8.84597	0.00353794
469	0P_45AM	0.03	0.255722	0P	0	0.00165	45	POSTSHEAR	5	1.81156e-05	0.00644821	0.0111871	0.0347678	1919.22
470	0P_45AM	0.03	0.255722	0P	0	0.00165	45	PRESHEAR	6	2500.31	8.31034	0.0297716	8.51658	0.00340621
471	0P_45AM	0.03	0.255722	0P	0	0.00165	45	SHEAR	7	2000.25	6.55533	0.0248865	6.6357	0.00331744
472	0P_45AM	0.03	0.255722	0P	0	0.00165	45	POSTSHEAR	8	-3.42441e-05	0.00162544	0.0107114	0.0501992	-1465.92
473	0P_45AM	0.03	0.255722	0P	0	0.00165	45	PRESHEAR	9	2500.31	8.33598	0.0361406	8.41151	0.00336418
474	0P_60AM	0.03	0.255722	0P	0	0.00165	60	PRESHEAR	0	2500.3	24.75	0.159882	39.8565	0.0159407
475	0P_60AM	0.03	0.255722	0P	0	0.00165	60	SHEAR	1	2500.29	21.8303	0.0885557	24.3996	0.00975869
476	0P_60AM	0.03	0.255722	0P	0	0.00165	60	SHEAR	10	1750.2	16.6637	0.0375333	18.1706	0.010382
477	0P_60AM	0.03	0.255722	0P	0	0.00165	60	POSTSHEAR	11	-1.51525e-05	-0.082727	0.0166394	-0.0329231	2172.78
478	0P_60AM	0.03	0.255722	0P	0	0.00165	60	PRESHEAR	12	2500.29	25.9315	0.221946	137.716	0.0550802
479	0P_60AM	0.03	0.255722	0P	0	0.00165	60	SHEAR	13	1500.17	14.801	0.0136853	15.617	0.0104101
480	0P_60AM	0.03	0.255722	0P	0	0.00165	60	POSTSHEAR	14	-3.68546e-06	-0.107279	0.0116424	-0.0628937	17065.4
481	0P_60AM	0.03	0.255722	0P	0	0.00165	60	PRESHEAR	15	2500.31	25.988	0.228592	159.218	0.0636794
482	0P_60AM	0.03	0.255722	0P	0	0.00165	60	SHEAR	16	1250.15	12.9506	0.0133062	13.2624	0.0106087
483	0P_60AM	0.03	0.255722	0P	0	0.00165	60	POSTSHEAR	17	-5.39322e-06	-0.129551	0.0218252	-0.0954702	17701.9
484	0P_60AM	0.03	0.255722	0P	0	0.00165	60	PRESHEAR	18	2500.31	26.0196	0.22967	148.127	0.0592436
485	0P_60AM	0.03	0.255722	0P	0	0.00165	60	SHEAR	19	1000.13	11.063	0.0115639	11.1084	0.011107
486	0P_60AM	0.03	0.255722	0P	0	0.00165	60	POSTSHEAR	2	2.18945e-05	-0.0318655	0.0189739	0.0114926	524.907
487	0P_60AM	0.03	0.255722	0P	0	0.00165	60	POSTSHEAR	20	-2.99612e-05	-0.148037	0.0168899	-0.100486	3353.89
488	0P_60AM	0.03	0.255722	0P	0	0.00165	60	PRESHEAR	21	2500.31	25.6265	0.236986	159.52	0.0638
489	0P_60AM	0.03	0.255722	0P	0	0.00165	60	SHEAR	22	750.1	9.08989	0.0235638	9.14069	0.012186
490	0P_60AM	0.03	0.255722	0P	0	0.00165	60	POSTSHEAR	23	-8.78861e-06	-0.159384	0.0198292	-0.111988	12742.3
491	0P_60AM	0.03	0.255722	0P	0	0.00165	60	PRESHEAR	24	2500.31	25.7116	0.236363	177.345	0.0709293
492	0P_60AM	0.03	0.255722	0P	0	0.00165	60	SHEAR	25	500.061	7.65311	0.0188416	7.71014	0.0154184
493	0P_60AM	0.03	0.255722	0P	0	0.00165	60	POSTSHEAR	26	-3.13245e-05	-0.163411	0.0122848	-0.116425	3716.74
494	0P_60AM	0.03	0.255722	0P	0	0.00165	60	PRESHEAR	27	2500.31	25.5747	0.220947	154.203	0.0616737
495	0P_60AM	0.03	0.255722	0P	0	0.00165	60	SHEAR	28	250.028	2.59593	0.0364134	3.06825	0.0122716
496	0P_60AM	0.03	0.255722	0P	0	0.00165	60	POSTSHEAR	29	-2.50756e-05	-0.178165	0.0159104	-0.139176	5550.26
497	0P_60AM	0.03	0.255722	0P	0	0.00165	60	PRESHEAR	3	2500.3	25.81	0.211741	128.005	0.0511959
498	0P_60AM	0.03	0.255722	0P	0	0.00165	60	PRESHEAR	30	2500.29	24.0735	0.175602	59.0998	0.0236372
499	0P_60AM	0.03	0.255722	0P	0	0.00165	60	SHEAR	31	100.013	0.201503	0.0108847	0.750667	0.00750571
500	0P_60AM	0.03	0.255722	0P	0	0.00165	60	POSTSHEAR	32	-3.49431e-05	-0.196771	0.0162667	-0.15053	4307.85
501	0P_60AM	0.03	0.255722	0P	0	0.00165	60	PRESHEAR	33	2500.3	24.7101	0.192803	45.9902	0.0183939
502	0P_60AM	0.03	0.255722	0P	0	0.00165	60	SHEAR	34	75.0087	0.113151	0.0193942	0.515068	0.00686678
503	0P_60AM	0.03	0.255722	0P	0	0.00165	60	POSTSHEAR	35	-8.64371e-06	-0.194912	0.0118467	-0.160688	18590.2
504	0P_60AM	0.03	0.255722	0P	0	0.00165	60	PRESHEAR	36	2500.29	25.471	0.23295	71.3839	0.0285502
505	0P_60AM	0.03	0.255722	0P	0	0.00165	60	SHEAR	37	50.0063	0.0664295	0.0166197	0.249257	0.00498452
506	0P_60AM	0.03	0.255722	0P	0	0.00165	60	POSTSHEAR	38	2.79596e-05	-0.206132	0.0159573	-0.167574	-5993.44
507	0P_60AM	0.03	0.255722	0P	0	0.00165	60	PRESHEAR	39	2500.3	25.7234	0.243159	63.4944	0.0253946
508	0P_60AM	0.03	0.255722	0P	0	0.00165	60	SHEAR	4	2250.28	20.2179	0.0674392	22.9202	0.0101855
509	0P_60AM	0.03	0.255722	0P	0	0.00165	60	SHEAR	40	25.0027	-0.0498107	0.0112928	-0.01196	-0.000478347
510	0P_60AM	0.03	0.255722	0P	0	0.00165	60	POSTSHEAR	41	-3.772e-05	-0.239685	0.0140498	-0.189148	5014.52
511	0P_60AM	0.03	0.255722	0P	0	0.00165	60	PRESHEAR	42	2500.3	24.9392	0.203785	48.062	0.0192225
512	0P_60AM	0.03	0.255722	0P	0	0.00165	60	SHEAR	43	10.0013	0.027282	0.0931145	0.249272	0.0249239
513	0P_60AM	0.03	0.255722	0P	0	0.00165	60	POSTSHEAR	44	-3.5294e-05	-0.238566	0.0110104	-0.189717	5375.34
514	0P_60AM	0.03	0.255722	0P	0	0.00165	60	PRESHEAR	45	2500.3	25.0665	0.21458	53.9308	0.0215697
515	0P_60AM	0.03	0.255722	0P	0	0.00165	60	SHEAR	46	0.999651	-0.182576	0.0455627	-0.0737461	-0.0737718
516	0P_60AM	0.03	0.255722	0P	0	0.00165	60	POSTSHEAR	47	-6.68283e-05	-0.255833	0.0157468	-0.220326	3296.9
517	0P_60AM	0.03	0.255722	0P	0	0.00165	60	PRESHEAR	48	2500.3	25.4521	0.226262	103.006	0.0411975
518	0P_60AM	0.03	0.255722	0P	0	0.00165	60	POSTSHEAR	5	-8.46676e-06	-0.0698407	0.0177897	0.00858288	-1013.71
519	0P_60AM	0.03	0.255722	0P	0	0.00165	60	PRESHEAR	6	2500.31	25.967	0.233134	128.038	0.051209
520	0P_60AM	0.03	0.255722	0P	0	0.00165	60	SHEAR	7	2000.23	18.4182	0.0432783	20.5562	0.0102769
521	0P_60AM	0.03	0.255722	0P	0	0.00165	60	POSTSHEAR	8	2.72498e-05	-0.0703645	0.0181018	-0.0170243	-624.751
522	0P_60AM	0.03	0.255722	0P	0	0.00165	60	PRESHEAR	9	2500.29	26.0473	0.226377	144.424	0.0577627
523	1HP_0AM	0.03	0.255722	1HP	10.36	0.006077	0	PRESHEAR	0	2500.55	53.3578	0.127883	53.9012	0.0215558
524	1HP_0AM	0.03	0.255722	1HP	10.36	0.006077	0	SHEAR	1	2500.54	53.2707	0.124371	53.5378	0.0214105
525	1HP_0AM	0.03	0.255722	1HP	10.36	0.006077	0	SHEAR	10	1850.41	44.0824	0.0677695	44.2004	0.0238868
526	1HP_0AM	0.03	0.255722	1HP	10.36	0.006077	0	POSTSHEAR	11	2.38685e-05	-0.37278	0.0273381	-0.282125	-11820
527	1HP_0AM	0.03	0.255722	1HP	10.36	0.006077	0	PRESHEAR	12	2500.55	53.1566	0.127419	53.5651	0.0214214
528	1HP_0AM	0.03	0.255722	1HP	10.36	0.006077	0	SHEAR	13	1750.39	42.5654	0.0510856	42.6591	0.0243712
529	1HP_0AM	0.03	0.255722	1HP	10.36	0.006077	0	POSTSHEAR	14	-2.47886e-06	-0.47276	0.0186864	-0.343353	138513
530	1HP_0AM	0.03	0.255722	1HP	10.36	0.006077	0	PRESHEAR	15	2500.56	53.124	0.132431	53.5161	0.0214017
531	1HP_0AM	0.03	0.255722	1HP	10.36	0.006077	0	SHEAR	16	1600.37	40.3068	0.0343128	40.3839	0.0252342
532	1HP_0AM	0.03	0.255722	1HP	10.36	0.006077	0	POSTSHEAR	17	-8.39087e-06	-0.476059	0.0134075	-0.408706	48708.4
533	1HP_0AM	0.03	0.255722	1HP	10.36	0.006077	0	PRESHEAR	18	2500.57	53.0646	0.114817	53.4867	0.0213898
534	1HP_0AM	0.03	0.255722	1HP	10.36	0.006077	0	SHEAR	19	1500.34	38.7707	0.0272243	38.8263	0.0258783
535	1HP_0AM	0.03	0.255722	1HP	10.36	0.006077	0	POSTSHEAR	2	-2.05344e-05	-0.493028	0.0247229	-0.395063	19239.1
536	1HP_0AM	0.03	0.255722	1HP	10.36	0.006077	0	POSTSHEAR	20	-3.42915e-06	-0.503702	0.0230097	-0.45098	131513
537	1HP_0AM	0.03	0.255722	1HP	10.36	0.006077	0	PRESHEAR	21	2500.55	52.9799	0.125912	53.4349	0.0213693
538	1HP_0AM	0.03	0.255722	1HP	10.36	0.006077	0	SHEAR	22	1400.31	37.1178	0.0217969	37.2093	0.0265721
539	1HP_0AM	0.03	0.255722	1HP	10.36	0.006077	0	POSTSHEAR	23	-3.64972e-06	-0.513646	0.0263953	-0.467026	127962
540	1HP_0AM	0.03	0.255722	1HP	10.36	0.006077	0	PRESHEAR	24	2500.57	52.9518	0.125252	53.3699	0.0213431
541	1HP_0AM	0.03	0.255722	1HP	10.36	0.006077	0	SHEAR	25	1250.28	34.7976	0.0222983	34.8553	0.027878
542	1HP_0AM	0.03	0.255722	1HP	10.36	0.006077	0	POSTSHEAR	26	-1.13966e-05	-0.528264	0.0108979	-0.467371	41009.8
543	1HP_0AM	0.03	0.255722	1HP	10.36	0.006077	0	PRESHEAR	27	2500.55	52.9533	0.121856	53.3292	0.021327
544	1HP_0AM	0.03	0.255722	1HP	10.36	0.006077	0	SHEAR	28	1000.22	30.7682	0.0520827	30.8469	0.0308402
545	1HP_0AM	0.03	0.255722	1HP	10.36	0.006077	0	POSTSHEAR	29	-2.17451e-05	-0.652098	0.0211769	-0.583307	26824.7
546	1HP_0AM	0.03	0.255722	1HP	10.36	0.006077	0	PRESHEAR	3	2500.56	53.2713	0.128799	53.5896	0.021431
547	1HP_0AM	0.03	0.255722	1HP	10.36	0.006077	0	PRESHEAR	30	2500.57	52.9012	0.121125	53.3427	0.0213322
548	1HP_0AM	0.03	0.255722	1HP	10.36	0.006077	0	SHEAR	31	750.165	26.4117	0.0618007	26.5127	0.0353425
549	1HP_0AM	0.03	0.255722	1HP	10.36	0.006077	0	POSTSHEAR	32	1.00321e-06	-0.461816	0.011691	-0.425584	-424221
550	1HP_0AM	0.03	0.255722	1HP	10.36	0.006077	0	PRESHEAR	33	2500.55	52.8333	0.136308	53.358	0.0213385
551	1HP_0AM	0.03	0.255722	1HP	10.36	0.006077	0	SHEAR	34	600.133	23.5759	0.0625095	23.6811	0.0394597
552	1HP_0AM	0.03	0.255722	1HP	10.36	0.006077	0	POSTSHEAR	35	-1.04388e-05	-0.391801	0.0122994	-0.318401	30501.8
553	1HP_0AM	0.03	0.255722	1HP	10.36	0.006077	0	PRESHEAR	36	2500.55	52.8695	0.119826	53.3408	0.0213316
554	1HP_0AM	0.03	0.255722	1HP	10.36	0.006077	0	SHEAR	37	500.111	21.6027	0.065529	21.7105	0.0434114
555	1HP_0AM	0.03	0.255722	1HP	10.36	0.006077	0	POSTSHEAR	38	-5.25972e-06	-0.403426	0.0145626	-0.319365	60719
556	1HP_0AM	0.03	0.255722	1HP	10.36	0.006077	0	PRESHEAR	39	2500.54	52.8327	0.125979	53.3337	0.0213288
557	1HP_0AM	0.03	0.255722	1HP	10.36	0.006077	0	SHEAR	4	2250.5	49.8281	0.11238	50.021	0.0222266
558	1HP_0AM	0.03	0.255722	1HP	10.36	0.006077	0	SHEAR	40	400.088	19.4628	0.0598045	19.5916	0.0489682
559	1HP_0AM	0.03	0.255722	1HP	10.36	0.006077	0	POSTSHEAR	41	-6.57989e-06	-0.391151	0.0231848	-0.300165	45618.5
560	1HP_0AM	0.03	0.255722	1HP	10.36	0.006077	0	PRESHEAR	42	2500.55	52.8478	0.121418	53.2792	0.021307
561	1HP_0AM	0.03	0.255722	1HP	10.36	0.006077	0	SHEAR	43	250.055	15.8341	0.0671628	16.0396	0.0641443
562	1HP_0AM	0.03	0.255722	1HP	10.36	0.006077	0	POSTSHEAR	44	-1.3784e-06	-0.208511	0.0142639	-0.0913418	66266.5
563	1HP_0AM	0.03	0.255722	1HP	10.36	0.006077	0	PRESHEAR	45	2500.55	52.7598	0.13335	53.264	0.0213009
564	1HP_0AM	0.03	0.255722	1HP	10.36	0.006077	0	SHEAR	46	200.045	14.4965	0.0436866	14.6619	0.0732927
565	1HP_0AM	0.03	0.255722	1HP	10.36	0.006077	0	POSTSHEAR	47	-1.61404e-05	-0.0902606	0.0209254	-0.00578955	358.699
566	1HP_0AM	0.03	0.255722	1HP	10.36	0.006077	0	PRESHEAR	48	2500.56	52.7549	0.133138	53.2345	0.0212891
567	1HP_0AM	0.03	0.255722	1HP	10.36	0.006077	0	SHEAR	49	100.023	11.3057	0.0357965	11.5126	0.1151
568	1HP_0AM	0.03	0.255722	1HP	10.36	0.006077	0	POSTSHEAR	5	-1.86604e-05	-0.402243	0.0175108	-0.372278	19950.2
569	1HP_0AM	0.03	0.255722	1HP	10.36	0.006077	0	POSTSHEAR	50	-2.14373e-06	0.105124	0.0191446	0.280703	-130941
570	1HP_0AM	0.03	0.255722	1HP	10.36	0.006077	0	PRESHEAR	51	2500.54	52.6659	0.132693	53.1528	0.0212565
571	1HP_0AM	0.03	0.255722	1HP	10.36	0.006077	0	SHEAR	52	75.0165	10.2322	0.0263568	10.5494	0.140628
572	1HP_0AM	0.03	0.255722	1HP	10.36	0.006077	0	POSTSHEAR	53	1.45083e-05	0.253257	0.0127374	0.525618	36228.7
573	1HP_0AM	0.03	0.255722	1HP	10.36	0.006077	0	PRESHEAR	54	2500.53	52.6254	0.1329	53.0747	0.0212253
574	1HP_0AM	0.03	0.255722	1HP	10.36	0.006077	0	SHEAR	55	50.0119	9.08529	0.0350508	9.47187	0.189392
575	1HP_0AM	0.03	0.255722	1HP	10.36	0.006077	0	POSTSHEAR	56	1.71622e-05	0.285774	0.014586	0.509042	29660.7
576	1HP_0AM	0.03	0.255722	1HP	10.36	0.006077	0	PRESHEAR	57	2500.55	52.5407	0.119863	52.9582	0.0211786
577	1HP_0AM	0.03	0.255722	1HP	10.36	0.006077	0	SHEAR	58	25.0058	7.43956	0.0221976	7.97245	0.318824
578	1HP_0AM	0.03	0.255722	1HP	10.36	0.006077	0	POSTSHEAR	59	-1.27266e-05	0.471685	0.0187403	0.742557	-58347.1
579	1HP_0AM	0.03	0.255722	1HP	10.36	0.006077	0	PRESHEAR	6	2500.55	53.2486	0.123311	53.6382	0.0214505
580	1HP_0AM	0.03	0.255722	1HP	10.36	0.006077	0	PRESHEAR	60	2500.55	52.5055	0.134986	52.9128	0.0211605
581	1HP_0AM	0.03	0.255722	1HP	10.36	0.006077	0	SHEAR	61	10.0021	5.89503	0.0311517	6.76074	0.675932
582	1HP_0AM	0.03	0.255722	1HP	10.36	0.006077	0	SHEAR	7	2000.44	46.2715	0.0851335	46.4248	0.0232072
583	1HP_0AM	0.03	0.255722	1HP	10.36	0.006077	0	POSTSHEAR	8	1.60756e-05	-0.245997	0.0254827	-0.19585	-12183.1
584	1HP_0AM	0.03	0.255722	1HP	10.36	0.006077	0	PRESHEAR	9	2500.56	53.1996	0.130398	53.6566	0.0214578
585	1HP_10AM	0.03	0.255722	1HP	10.21	0.005978	10	PRESHEAR	0	2500.31	31.3241	0.0318029	31.4442	0.0125761
586	1HP_10AM	0.03	0.255722	1HP	10.21	0.005978	10	SHEAR	1	2500.29	31.2994	0.0323707	31.411	0.0125629
587	1HP_10AM	0.03	0.255722	1HP	10.21	0.005978	10	SHEAR	10	1750.21	23.2185	0.0185272	23.2773	0.0132997
588	1HP_10AM	0.03	0.255722	1HP	10.21	0.005978	10	POSTSHEAR	11	-2.47627e-05	0.02074	0.0122994	0.068156	-2752.37
589	1HP_10AM	0.03	0.255722	1HP	10.21	0.005978	10	PRESHEAR	12	2500.31	30.99	0.027896	31.1477	0.0124575
590	1HP_10AM	0.03	0.255722	1HP	10.21	0.005978	10	SHEAR	13	1500.17	20.4791	0.0095582	20.514	0.0136745
591	1HP_10AM	0.03	0.255722	1HP	10.21	0.005978	10	POSTSHEAR	14	6.74196e-05	0.0335776	0.0208537	0.123387	1830.14
592	1HP_10AM	0.03	0.255722	1HP	10.21	0.005978	10	PRESHEAR	15	2500.28	30.9588	0.0292463	31.0807	0.0124309
593	1HP_10AM	0.03	0.255722	1HP	10.21	0.005978	10	SHEAR	16	1250.16	17.6682	0.0233271	17.7101	0.0141662
594	1HP_10AM	0.03	0.255722	1HP	10.21	0.005978	10	POSTSHEAR	17	2.54542e-05	0.0411975	0.015586	0.0964524	3789.25
595	1HP_10AM	0.03	0.255722	1HP	10.21	0.005978	10	PRESHEAR	18	2500.29	30.8707	0.0378173	31.016	0.0124049
596	1HP_10AM	0.03	0.255722	1HP	10.21	0.005978	10	SHEAR	19	1000.12	14.8	0.0113328	14.8378	0.0148359
597	1HP_10AM	0.03	0.255722	1HP	10.21	0.005978	10	POSTSHEAR	2	1.01581e-05	0.0111503	0.00787237	0.0560633	5519.09
598	1HP_10AM	0.03	0.255722	1HP	10.21	0.005978	10	POSTSHEAR	20	1.08235e-05	0.0732815	0.0167584	0.130445	12052
599	1HP_10AM	0.03	0.255722	1HP	10.21	0.005978	10	PRESHEAR	21	2500.29	30.7986	0.0314088	30.9276	0.0123696
600	1HP_10AM	0.03	0.255722	1HP	10.21	0.005978	10	SHEAR	22	750.079	11.7915	0.0135323	11.8691	0.0158238
601	1HP_10AM	0.03	0.255722	1HP	10.21	0.005978	10	POSTSHEAR	23	-3.81319e-05	0.0634313	0.0160697	0.149935	-3932.01
602	1HP_10AM	0.03	0.255722	1HP	10.21	0.005978	10	PRESHEAR	24	2500.3	30.7073	0.0324153	30.8481	0.0123378
603	1HP_10AM	0.03	0.255722	1HP	10.21	0.005978	10	SHEAR	25	500.057	8.67759	0.013555	8.7799	0.0175578
604	1HP_10AM	0.03	0.255722	1HP	10.21	0.005978	10	POSTSHEAR	26	-1.94507e-05	0.10161	0.0165486	0.15311	-7871.72
605	1HP_10AM	0.03	0.255722	1HP	10.21	0.005978	10	PRESHEAR	27	2500.3	30.6205	0.0268881	30.7387	0.012294
606	1HP_10AM	0.03	0.255722	1HP	10.21	0.005978	10	SHEAR	28	250.024	5.3993	0.0163158	5.48088	0.0219214
607	1HP_10AM	0.03	0.255722	1HP	10.21	0.005978	10	POSTSHEAR	29	-5.54487e-06	0.0965748	0.0106491	0.192376	-34694.4
608	1HP_10AM	0.03	0.255722	1HP	10.21	0.005978	10	PRESHEAR	3	2500.3	31.2135	0.0296571	31.3564	0.0125411
609	1HP_10AM	0.03	0.255722	1HP	10.21	0.005978	10	PRESHEAR	30	2500.31	30.5487	0.0280452	30.6863	0.012273
610	1HP_10AM	0.03	0.255722	1HP	10.21	0.005978	10	SHEAR	31	100.017	3.0952	0.0163845	3.16556	0.0316501
611	1HP_10AM	0.03	0.255722	1HP	10.21	0.005978	10	POSTSHEAR	32	6.07477e-06	0.107871	0.0104302	0.176625	29075.2
612	1HP_10AM	0.03	0.255722	1HP	10.21	0.005978	10	PRESHEAR	33	2500.31	30.5052	0.0281772	30.6359	0.0122528
613	1HP_10AM	0.03	0.255722	1HP	10.21	0.005978	10	SHEAR	34	75.0086	2.65564	0.00787689	2.71355	0.0361765
614	1HP_10AM	0.03	0.255722	1HP	10.21	0.005978	10	POSTSHEAR	35	-3.00389e-05	0.155155	0.0139649	0.192954	-6423.49
615	1HP_10AM	0.03	0.255722	1HP	10.21	0.005978	10	PRESHEAR	36	2500.3	30.4809	0.0274479	30.5852	0.0122326
616	1HP_10AM	0.03	0.255722	1HP	10.21	0.005978	10	SHEAR	37	50.008	2.16793	0.0121841	2.24431	0.0448789
617	1HP_10AM	0.03	0.255722	1HP	10.21	0.005978	10	POSTSHEAR	38	-4.79807e-05	0.126991	0.0128498	0.191454	-3990.24
618	1HP_10AM	0.03	0.255722	1HP	10.21	0.005978	10	PRESHEAR	39	2500.29	30.407	0.0273323	30.5132	0.0122038
619	1HP_10AM	0.03	0.255722	1HP	10.21	0.005978	10	SHEAR	4	2250.27	28.6047	0.0319284	28.7032	0.0127554
620	1HP_10AM	0.03	0.255722	1HP	10.21	0.005978	10	SHEAR	40	25.0051	1.61884	0.0120645	1.67118	0.0668335
621	1HP_10AM	0.03	0.255722	1HP	10.21	0.005978	10	POSTSHEAR	41	1.03284e-05	0.157794	0.0198644	0.187147	18119.6
622	1HP_10AM	0.03	0.255722	1HP	10.21	0.005978	10	PRESHEAR	42	2500.3	30.3157	0.0269777	30.4242	0.0121682
623	1HP_10AM	0.03	0.255722	1HP	10.21	0.005978	10	SHEAR	43	9.99892	1.20445	0.00990355	1.26213	0.126227
624	1HP_10AM	0.03	0.255722	1HP	10.21	0.005978	10	POSTSHEAR	44	3.13131e-05	0.15339	0.0160407	0.216629	6918.14
625	1HP_10AM	0.03	0.255722	1HP	10.21	0.005978	10	PRESHEAR	45	2500.28	30.3942	0.0329674	30.5251	0.0122087
626	1HP_10AM	0.03	0.255722	1HP	10.21	0.005978	10	SHEAR	46	0.999683	0.627561	0.0148873	0.665858	0.666069
627	1HP_10AM	0.03	0.255722	1HP	10.21	0.005978	10	POSTSHEAR	47	1.11218e-05	0.244114	0.0183137	0.289715	26049.4
628	1HP_10AM	0.03	0.255722	1HP	10.21	0.005978	10	PRESHEAR	48	2500.31	30.3597	0.030953	30.4403	0.0121746
629	1HP_10AM	0.03	0.255722	1HP	10.21	0.005978	10	POSTSHEAR	5	-5.15647e-06	0.030524	0.0184718	0.0701341	-13601.2
630	1HP_10AM	0.03	0.255722	1HP	10.21	0.005978	10	PRESHEAR	6	2500.3	31.1607	0.0300774	31.2826	0.0125116
631	1HP_10AM	0.03	0.255722	1HP	10.21	0.005978	10	SHEAR	7	2000.22	25.9226	0.0223175	25.9932	0.0129951
632	1HP_10AM	0.03	0.255722	1HP	10.21	0.005978	10	POSTSHEAR	8	-1.92231e-05	0.0450583	0.0134815	0.0857008	-4458.23
633	1HP_10AM	0.03	0.255722	1HP	10.21	0.005978	10	PRESHEAR	9	2500.29	31.0781	0.0342207	31.2308	0.0124909
634	1HP_20AM	0.03	0.255722	1HP	10.24	0.005998	20	PRESHEAR	0	2500.28	30.2039	0.136522	30.4742	0.0121883
635	1HP_20AM	0.03	0.255722	1HP	10.24	0.005998	20	SHEAR	1	2500.32	30.1823	0.143905	30.4007	0.0121587
636	1HP_20AM	0.03	0.255722	1HP	10.24	0.005998	20	SHEAR	10	1750.22	22.1313	0.051233	22.209	0.0126893
637	1HP_20AM	0.03	0.255722	1HP	10.24	0.005998	20	POSTSHEAR	11	-1.23846e-05	-0.0366678	0.0111072	-0.0094243	760.967
638	1HP_20AM	0.03	0.255722	1HP	10.24	0.005998	20	PRESHEAR	12	2500.29	29.8993	0.140671	30.1215	0.0120472
639	1HP_20AM	0.03	0.255722	1HP	10.24	0.005998	20	SHEAR	13	1500.18	19.3666	0.0159085	19.4135	0.0129408
640	1HP_20AM	0.03	0.255722	1HP	10.24	0.005998	20	POSTSHEAR	14	-1.42213e-05	-0.0470385	0.0141928	-0.0138961	977.13
641	1HP_20AM	0.03	0.255722	1HP	10.24	0.005998	20	PRESHEAR	15	2500.31	29.8628	0.127067	30.0501	0.0120185
642	1HP_20AM	0.03	0.255722	1HP	10.24	0.005998	20	SHEAR	16	1250.15	16.5665	0.0187096	16.6188	0.0132935
643	1HP_20AM	0.03	0.255722	1HP	10.24	0.005998	20	POSTSHEAR	17	-6.02667e-07	-0.105413	0.0191353	-0.0388067	64391.7
644	1HP_20AM	0.03	0.255722	1HP	10.24	0.005998	20	PRESHEAR	18	2500.29	29.7661	0.13029	29.981	0.011991
645	1HP_20AM	0.03	0.255722	1HP	10.24	0.005998	20	SHEAR	19	1000.13	13.6826	0.033259	13.7643	0.0137626
646	1HP_20AM	0.03	0.255722	1HP	10.24	0.005998	20	POSTSHEAR	2	4.82254e-05	-0.00437671	0.0177189	0.0334152	692.897
647	1HP_20AM	0.03	0.255722	1HP	10.24	0.005998	20	POSTSHEAR	20	1.69779e-05	-0.0788964	0.0118309	-0.0410534	-2418.05
648	1HP_20AM	0.03	0.255722	1HP	10.24	0.005998	20	PRESHEAR	21	2500.29	29.7071	0.137439	29.9109	0.0119629
649	1HP_20AM	0.03	0.255722	1HP	10.24	0.005998	20	SHEAR	22	750.076	10.753	0.044891	10.8377	0.0144488
650	1HP_20AM	0.03	0.255722	1HP	10.24	0.005998	20	POSTSHEAR	23	-6.67894e-05	-0.0989013	0.0123072	-0.0483293	723.607
651	1HP_20AM	0.03	0.255722	1HP	10.24	0.005998	20	PRESHEAR	24	2500.31	29.6442	0.124742	29.8217	0.0119272
652	1HP_20AM	0.03	0.255722	1HP	10.24	0.005998	20	SHEAR	25	500.061	7.7135	0.0369659	7.78462	0.0155673
653	1HP_20AM	0.03	0.255722	1HP	10.24	0.005998	20	POSTSHEAR	26	1.9639e-06	-0.0968301	0.0110205	-0.0394139	-20069.2
654	1HP_20AM	0.03	0.255722	1HP	10.24	0.005998	20	PRESHEAR	27	2500.3	29.5871	0.136476	29.8046	0.0119204
655	1HP_20AM	0.03	0.255722	1HP	10.24	0.005998	20	SHEAR	28	250.033	4.4522	0.025193	4.55149	0.0182036
656	1HP_20AM	0.03	0.255722	1HP	10.24	0.005998	20	POSTSHEAR	29	1.416e-05	-0.0896044	0.0161249	-0.0552889	-3904.58
657	1HP_20AM	0.03	0.255722	1HP	10.24	0.005998	20	PRESHEAR	3	2500.3	30.1199	0.138168	30.3315	0.0121312
658	1HP_20AM	0.03	0.255722	1HP	10.24	0.005998	20	PRESHEAR	30	2500.3	29.5648	0.126346	29.7646	0.0119044
659	1HP_20AM	0.03	0.255722	1HP	10.24	0.005998	20	SHEAR	31	100.01	2.33048	0.0231605	2.38357	0.0238333
660	1HP_20AM	0.03	0.255722	1HP	10.24	0.005998	20	POSTSHEAR	32	0.000101653	-0.10306	0.0101796	-0.0653255	-642.63
661	1HP_20AM	0.03	0.255722	1HP	10.24	0.005998	20	PRESHEAR	33	2500.28	29.4978	0.127816	29.7255	0.0118889
662	1HP_20AM	0.03	0.255722	1HP	10.24	0.005998	20	SHEAR	34	75.0119	1.90306	0.0176505	1.95433	0.0260536
663	1HP_20AM	0.03	0.255722	1HP	10.24	0.005998	20	POSTSHEAR	35	2.63647e-05	-0.118424	0.00673195	-0.0703757	-2669.32
664	1HP_20AM	0.03	0.255722	1HP	10.24	0.005998	20	PRESHEAR	36	2500.29	29.4084	0.139665	29.6605	0.0118628
665	1HP_20AM	0.03	0.255722	1HP	10.24	0.005998	20	SHEAR	37	50.006	1.46291	0.0138305	1.49098	0.0298161
666	1HP_20AM	0.03	0.255722	1HP	10.24	0.005998	20	POSTSHEAR	38	-1.35376e-05	-0.125567	0.00843335	-0.0908292	6709.4
667	1HP_20AM	0.03	0.255722	1HP	10.24	0.005998	20	PRESHEAR	39	2500.29	29.3746	0.132524	29.5954	0.0118368
668	1HP_20AM	0.03	0.255722	1HP	10.24	0.005998	20	SHEAR	4	2250.25	27.4669	0.106317	27.687	0.0123039
669	1HP_20AM	0.03	0.255722	1HP	10.24	0.005998	20	SHEAR	40	25.0035	0.943022	0.0156182	0.984504	0.0393746
670	1HP_20AM	0.03	0.255722	1HP	10.24	0.005998	20	POSTSHEAR	41	-7.19945e-05	-0.135226	0.0134991	-0.0754103	1047.45
671	1HP_20AM	0.03	0.255722	1HP	10.24	0.005998	20	PRESHEAR	42	2500.29	29.2805	0.135453	29.5238	0.0118082
672	1HP_20AM	0.03	0.255722	1HP	10.24	0.005998	20	SHEAR	43	10.0007	0.553419	0.0187468	0.608319	0.0608275
673	1HP_20AM	0.03	0.255722	1HP	10.24	0.005998	20	POSTSHEAR	44	-3.32499e-05	-0.131567	0.0105253	-0.0765635	2302.67
674	1HP_20AM	0.03	0.255722	1HP	10.24	0.005998	20	PRESHEAR	45	2500.29	29.195	0.134645	29.4382	0.0117739
675	1HP_20AM	0.03	0.255722	1HP	10.24	0.005998	20	SHEAR	46	1.00102	0.0385362	0.0142349	0.070366	0.0702945
676	1HP_20AM	0.03	0.255722	1HP	10.24	0.005998	20	POSTSHEAR	47	-4.94737e-06	-0.131924	0.0163544	-0.0809952	16371.4
677	1HP_20AM	0.03	0.255722	1HP	10.24	0.005998	20	PRESHEAR	48	2500.3	29.076	0.136349	29.3124	0.0117236
678	1HP_20AM	0.03	0.255722	1HP	10.24	0.005998	20	POSTSHEAR	5	-6.81794e-06	-0.0206684	0.0152977	0.0181805	-2666.56
679	1HP_20AM	0.03	0.255722	1HP	10.24	0.005998	20	PRESHEAR	6	2500.29	30.0157	0.145954	30.2353	0.0120927
680	1HP_20AM	0.03	0.255722	1HP	10.24	0.005998	20	SHEAR	7	2000.23	24.8408	0.0757184	24.9569	0.012477
681	1HP_20AM	0.03	0.255722	1HP	10.24	0.005998	20	POSTSHEAR	8	3.45193e-05	-0.0778197	0.0139318	0.00562033	162.817
682	1HP_20AM	0.03	0.255722	1HP	10.24	0.005998	20	PRESHEAR	9	2500.29	29.9605	0.136021	30.1689	0.0120661
683	1HP_35AM	0.03	0.255722	1HP	10.21	0.005978	35	PRESHEAR	0	2500.27	22.4342	0.0404828	22.5149	0.00900498
684	1HP_35AM	0.03	0.255722	1HP	10.21	0.005978	35	SHEAR	1	2500.3	22.6151	0.0346671	22.6881	0.00907416
685	1HP_35AM	0.03	0.255722	1HP	10.21	0.005978	35	SHEAR	10	1750.21	15.9128	0.0210622	15.9757	0.0091279
686	1HP_35AM	0.03	0.255722	1HP	10.21	0.005978	35	POSTSHEAR	11	-1.96295e-05	0.0206214	0.0121515	0.0723097	-3683.74
687	1HP_35AM	0.03	0.255722	1HP	10.21	0.005978	35	PRESHEAR	12	2500.29	22.3995	0.0432627	22.4838	0.00899248
688	1HP_35AM	0.03	0.255722	1HP	10.21	0.005978	35	SHEAR	13	1500.17	13.7178	0.0141366	13.7691	0.00917835
689	1HP_35AM	0.03	0.255722	1HP	10.21	0.005978	35	POSTSHEAR	14	-4.1506e-05	0.0304476	0.00956894	0.0928401	-2236.79
690	1HP_35AM	0.03	0.255722	1HP	10.21	0.005978	35	PRESHEAR	15	2500.28	22.4069	0.0357719	22.488	0.00899419
691	1HP_35AM	0.03	0.255722	1HP	10.21	0.005978	35	SHEAR	16	1250.16	11.4763	0.0135503	11.5943	0.00927425
692	1HP_35AM	0.03	0.255722	1HP	10.21	0.005978	35	POSTSHEAR	17	5.42337e-06	0.0391201	0.0138738	0.0895843	16518.2
693	1HP_35AM	0.03	0.255722	1HP	10.21	0.005978	35	PRESHEAR	18	2500.29	22.3972	0.0358414	22.4777	0.00899004
694	1HP_35AM	0.03	0.255722	1HP	10.21	0.005978	35	SHEAR	19	1000.12	9.27531	0.0182783	9.39061	0.00938947
695	1HP_35AM	0.03	0.255722	1HP	10.21	0.005978	35	POSTSHEAR	2	-2.82146e-05	0.016612	0.0121695	0.0564321	-2000.1
696	1HP_35AM	0.03	0.255722	1HP	10.21	0.005978	35	POSTSHEAR	20	2.01873e-05	0.0420689	0.0187802	0.105358	5219.01
697	1HP_35AM	0.03	0.255722	1HP	10.21	0.005978	35	PRESHEAR	21	2500.3	22.3673	0.0374517	22.4285	0.00897031
698	1HP_35AM	0.03	0.255722	1HP	10.21	0.005978	35	SHEAR	22	750.084	7.04971	0.0128901	7.15166	0.00953448
699	1HP_35AM	0.03	0.255722	1HP	10.21	0.005978	35	POSTSHEAR	23	-3.27389e-05	0.0345509	0.0249565	0.0905154	-2764.76
700	1HP_35AM	0.03	0.255722	1HP	10.21	0.005978	35	PRESHEAR	24	2500.3	22.3465	0.0373913	22.4261	0.00896934
701	1HP_35AM	0.03	0.255722	1HP	10.21	0.005978	35	SHEAR	25	500.063	5.03106	0.0223669	5.07236	0.0101434
702	1HP_35AM	0.03	0.255722	1HP	10.21	0.005978	35	POSTSHEAR	26	-7.10884e-06	0.054539	0.0236126	0.0964604	-13569.1
703	1HP_35AM	0.03	0.255722	1HP	10.21	0.005978	35	PRESHEAR	27	2500.31	22.3653	0.0325729	22.434	0.0089725
704	1HP_35AM	0.03	0.255722	1HP	10.21	0.005978	35	SHEAR	28	250.028	2.47603	0.0432209	2.61867	0.0104735
705	1HP_35AM	0.03	0.255722	1HP	10.21	0.005978	35	POSTSHEAR	29	-1.00428e-05	0.0289048	0.0240907	0.105061	-10461.3
706	1HP_35AM	0.03	0.255722	1HP	10.21	0.005978	35	PRESHEAR	3	2500.28	22.4714	0.035131	22.543	0.00901621
707	1HP_35AM	0.03	0.255722	1HP	10.21	0.005978	35	PRESHEAR	30	2500.31	22.3302	0.0491789	22.4235	0.0089683
708	1HP_35AM	0.03	0.255722	1HP	10.21	0.005978	35	SHEAR	31	100.013	0.878707	0.0143521	1.0263	0.0102617
709	1HP_35AM	0.03	0.255722	1HP	10.21	0.005978	35	POSTSHEAR	32	3.86465e-05	0.0202539	0.0208398	0.0860398	2226.33
710	1HP_35AM	0.03	0.255722	1HP	10.21	0.005978	35	PRESHEAR	33	2500.31	22.3216	0.0343601	22.3934	0.00895626
711	1HP_35AM	0.03	0.255722	1HP	10.21	0.005978	35	SHEAR	34	75.0079	0.680097	0.0158833	0.81322	0.0108418
712	1HP_35AM	0.03	0.255722	1HP	10.21	0.005978	35	POSTSHEAR	35	2.33768e-05	0.0510023	0.00911384	0.0986904	4221.72
713	1HP_35AM	0.03	0.255722	1HP	10.21	0.005978	35	PRESHEAR	36	2500.31	22.3116	0.0336937	22.3648	0.00894483
714	1HP_35AM	0.03	0.255722	1HP	10.21	0.005978	35	SHEAR	37	50.0057	0.471512	0.0125189	0.562354	0.0112458
715	1HP_35AM	0.03	0.255722	1HP	10.21	0.005978	35	POSTSHEAR	38	-4.3588e-05	0.0568463	0.0192529	0.107202	-2459.45
716	1HP_35AM	0.03	0.255722	1HP	10.21	0.005978	35	PRESHEAR	39	2500.31	22.2939	0.0324105	22.3575	0.00894189
717	1HP_35AM	0.03	0.255722	1HP	10.21	0.005978	35	SHEAR	4	2250.27	20.3393	0.0341457	20.4293	0.00907861
718	1HP_35AM	0.03	0.255722	1HP	10.21	0.005978	35	SHEAR	40	25.0054	0.267266	0.0116067	0.341966	0.0136757
719	1HP_35AM	0.03	0.255722	1HP	10.21	0.005978	35	POSTSHEAR	41	-8.39488e-06	0.0561856	0.02178	0.108262	-12896.2
720	1HP_35AM	0.03	0.255722	1HP	10.21	0.005978	35	PRESHEAR	42	2500.29	22.247	0.0369147	22.3162	0.00892543
721	1HP_35AM	0.03	0.255722	1HP	10.21	0.005978	35	SHEAR	43	10.0034	0.146017	0.0151539	0.199424	0.0199356
722	1HP_35AM	0.03	0.255722	1HP	10.21	0.005978	35	POSTSHEAR	44	-1.07914e-05	0.0276241	0.0177824	0.0999307	-9260.19
723	1HP_35AM	0.03	0.255722	1HP	10.21	0.005978	35	PRESHEAR	45	2500.29	22.2161	0.0431659	22.2919	0.00891572
724	1HP_35AM	0.03	0.255722	1HP	10.21	0.005978	35	SHEAR	46	1.00065	0.0839173	0.00957841	0.115186	0.115111
725	1HP_35AM	0.03	0.255722	1HP	10.21	0.005978	35	POSTSHEAR	47	-2.865e-07	0.0514937	0.0151987	0.103472	-361158
726	1HP_35AM	0.03	0.255722	1HP	10.21	0.005978	35	PRESHEAR	48	2500.26	22.2443	0.0354346	22.3068	0.00892179
727	1HP_35AM	0.03	0.255722	1HP	10.21	0.005978	35	POSTSHEAR	5	-1.40859e-05	0.00304603	0.0252273	0.0631582	-4483.77
728	1HP_35AM	0.03	0.255722	1HP	10.21	0.005978	35	PRESHEAR	6	2500.3	22.4374	0.0357997	22.5045	0.00900075
729	1HP_35AM	0.03	0.255722	1HP	10.21	0.005978	35	SHEAR	7	2000.25	18.1487	0.0278284	18.2022	0.00909999
730	1HP_35AM	0.03	0.255722	1HP	10.21	0.005978	35	POSTSHEAR	8	-4.86194e-05	0.0041039	0.0187885	0.0671614	-1381.37
731	1HP_35AM	0.03	0.255722	1HP	10.21	0.005978	35	PRESHEAR	9	2500.31	22.4371	0.0427285	22.5151	0.00900494
732	1LP_0AM	0.03	0.255722	1LP	10.76	0.004583	0	PRESHEAR	0	2500.55	49.0542	0.188422	49.4048	0.0197576
733	1LP_0AM	0.03	0.255722	1LP	10.76	0.004583	0	SHEAR	1	2750.61	51.5571	0.0428397	52.2033	0.0189788
734	1LP_0AM	0.03	0.255722	1LP	10.76	0.004583	0	SHEAR	10	2000.45	42.5786	0.124802	42.7943	0.0213923
735	1LP_0AM	0.03	0.255722	1LP	10.76	0.004583	0	POSTSHEAR	11	5.75337e-05	0.14318	0.0163311	0.173956	3023.55
736	1LP_0AM	0.03	0.255722	1LP	10.76	0.004583	0	PRESHEAR	12	2500.56	48.4525	0.186064	48.8842	0.0195493
737	1LP_0AM	0.03	0.255722	1LP	10.76	0.004583	0	SHEAR	13	1850.41	40.662	0.0858314	40.8363	0.0220688
738	1LP_0AM	0.03	0.255722	1LP	10.76	0.004583	0	POSTSHEAR	14	-1.64144e-05	0.281931	0.00952406	0.310661	-18926.1
739	1LP_0AM	0.03	0.255722	1LP	10.76	0.004583	0	PRESHEAR	15	2500.55	48.3448	0.17623	48.7782	0.019507
740	1LP_0AM	0.03	0.255722	1LP	10.76	0.004583	0	SHEAR	16	1750.39	39.2916	0.0698633	39.4371	0.0225305
741	1LP_0AM	0.03	0.255722	1LP	10.76	0.004583	0	POSTSHEAR	17	1.79329e-06	0.295607	0.00860764	0.348773	194488
742	1LP_0AM	0.03	0.255722	1LP	10.76	0.004583	0	PRESHEAR	18	2500.56	48.2243	0.184404	48.6806	0.0194679
743	1LP_0AM	0.03	0.255722	1LP	10.76	0.004583	0	SHEAR	19	1600.35	37.3411	0.0419588	37.4004	0.0233702
744	1LP_0AM	0.03	0.255722	1LP	10.76	0.004583	0	POSTSHEAR	2	2.2753e-06	0.605419	0.0112363	0.653684	287296
745	1LP_0AM	0.03	0.255722	1LP	10.76	0.004583	0	POSTSHEAR	20	1.52823e-05	-0.0330598	0.0070317	0.0387066	2532.78
746	1LP_0AM	0.03	0.255722	1LP	10.76	0.004583	0	PRESHEAR	21	2500.56	48.1669	0.178156	48.5868	0.0194304
747	1LP_0AM	0.03	0.255722	1LP	10.76	0.004583	0	SHEAR	22	1500.33	35.9385	0.0233318	35.9947	0.0239911
748	1LP_0AM	0.03	0.255722	1LP	10.76	0.004583	0	POSTSHEAR	23	1.1207e-05	0.0613551	0.0102893	0.105188	9385.85
749	1LP_0AM	0.03	0.255722	1LP	10.76	0.004583	0	PRESHEAR	24	2500.55	48.0139	0.191567	48.4934	0.0193931
750	1LP_0AM	0.03	0.255722	1LP	10.76	0.004583	0	SHEAR	25	1400.31	34.5343	0.0106412	34.5678	0.0246858
751	1LP_0AM	0.03	0.255722	1LP	10.76	0.004583	0	POSTSHEAR	26	-1.66602e-05	0.0885787	0.0096309	0.13216	-7932.7
752	1LP_0AM	0.03	0.255722	1LP	10.76	0.004583	0	PRESHEAR	27	2500.54	47.9158	0.181701	48.3919	0.0193526
753	1LP_0AM	0.03	0.255722	1LP	10.76	0.004583	0	SHEAR	28	1250.28	32.4206	0.0262881	32.4871	0.0259838
754	1LP_0AM	0.03	0.255722	1LP	10.76	0.004583	0	POSTSHEAR	29	7.87943e-07	-0.0631734	0.0132998	-0.0289135	-36694.9
755	1LP_0AM	0.03	0.255722	1LP	10.76	0.004583	0	PRESHEAR	3	2500.57	48.8864	0.18771	49.2701	0.0197036
756	1LP_0AM	0.03	0.255722	1LP	10.76	0.004583	0	PRESHEAR	30	2500.56	47.863	0.192809	48.2804	0.0193078
757	1LP_0AM	0.03	0.255722	1LP	10.76	0.004583	0	SHEAR	31	1000.22	28.8598	0.0613613	28.9574	0.0289509
758	1LP_0AM	0.03	0.255722	1LP	10.76	0.004583	0	POSTSHEAR	32	-8.49954e-06	0.189316	0.0139898	0.25709	-30247.5
759	1LP_0AM	0.03	0.255722	1LP	10.76	0.004583	0	PRESHEAR	33	2500.56	47.7511	0.183319	48.2274	0.0192867
760	1LP_0AM	0.03	0.255722	1LP	10.76	0.004583	0	SHEAR	34	750.168	25.0153	0.0687335	25.1701	0.0335526
761	1LP_0AM	0.03	0.255722	1LP	10.76	0.004583	0	POSTSHEAR	35	4.29247e-06	-0.100995	0.0130745	-0.0649229	-15124.8
762	1LP_0AM	0.03	0.255722	1LP	10.76	0.004583	0	PRESHEAR	36	2500.55	47.7086	0.18569	48.1561	0.0192582
763	1LP_0AM	0.03	0.255722	1LP	10.76	0.004583	0	SHEAR	37	600.133	22.4775	0.0822523	22.6845	0.0377992
764	1LP_0AM	0.03	0.255722	1LP	10.76	0.004583	0	POSTSHEAR	38	4.52531e-07	-0.0743056	0.00914688	-0.0335073	-74044.2
765	1LP_0AM	0.03	0.255722	1LP	10.76	0.004583	0	PRESHEAR	39	2500.55	47.6545	0.180089	48.1015	0.0192364
766	1LP_0AM	0.03	0.255722	1LP	10.76	0.004583	0	SHEAR	4	2500.55	48.8221	0.18144	49.1769	0.0196664
767	1LP_0AM	0.03	0.255722	1LP	10.76	0.004583	0	SHEAR	40	500.112	20.6855	0.0765258	20.9089	0.0418084
768	1LP_0AM	0.03	0.255722	1LP	10.76	0.004583	0	POSTSHEAR	41	1.03308e-06	0.131439	0.0125867	0.165051	159766
769	1LP_0AM	0.03	0.255722	1LP	10.76	0.004583	0	PRESHEAR	42	2500.55	47.5194	0.167792	48.0372	0.0192106
770	1LP_0AM	0.03	0.255722	1LP	10.76	0.004583	0	SHEAR	43	400.092	18.8317	0.0678335	18.9473	0.0473574
771	1LP_0AM	0.03	0.255722	1LP	10.76	0.004583	0	POSTSHEAR	44	6.25151e-06	0.217654	0.0147359	0.273861	43807.2
772	1LP_0AM	0.03	0.255722	1LP	10.76	0.004583	0	PRESHEAR	45	2500.55	47.5468	0.172926	48.047	0.0192145
773	1LP_0AM	0.03	0.255722	1LP	10.76	0.004583	0	SHEAR	46	250.056	15.6498	0.0608921	15.877	0.0634938
774	1LP_0AM	0.03	0.255722	1LP	10.76	0.004583	0	POSTSHEAR	47	-1.61703e-05	0.106111	0.00860071	0.283931	-17558.7
775	1LP_0AM	0.03	0.255722	1LP	10.76	0.004583	0	PRESHEAR	48	2500.55	47.4811	0.184428	47.9546	0.0191776
776	1LP_0AM	0.03	0.255722	1LP	10.76	0.004583	0	SHEAR	49	200.045	14.3456	0.0510103	14.6379	0.073173
777	1LP_0AM	0.03	0.255722	1LP	10.76	0.004583	0	POSTSHEAR	5	2.16327e-07	0.441836	0.00805528	0.498572	2.30471e+06
778	1LP_0AM	0.03	0.255722	1LP	10.76	0.004583	0	POSTSHEAR	50	3.52689e-06	0.250845	0.0160535	0.399542	113284
779	1LP_0AM	0.03	0.255722	1LP	10.76	0.004583	0	PRESHEAR	51	2500.56	47.385	0.17464	47.8915	0.0191523
780	1LP_0AM	0.03	0.255722	1LP	10.76	0.004583	0	SHEAR	52	100.022	11.425	0.0376449	11.7455	0.117429
781	1LP_0AM	0.03	0.255722	1LP	10.76	0.004583	0	POSTSHEAR	53	1.62858e-05	0.447035	0.0122846	0.706746	43396.4
782	1LP_0AM	0.03	0.255722	1LP	10.76	0.004583	0	PRESHEAR	54	2500.55	47.2945	0.165125	47.7691	0.0191034
783	1LP_0AM	0.03	0.255722	1LP	10.76	0.004583	0	SHEAR	55	75.0171	10.4716	0.0398653	10.8905	0.145174
784	1LP_0AM	0.03	0.255722	1LP	10.76	0.004583	0	POSTSHEAR	56	1.84531e-05	0.604462	0.0198277	0.842849	45675.3
785	1LP_0AM	0.03	0.255722	1LP	10.76	0.004583	0	PRESHEAR	57	2500.55	47.2883	0.172677	47.7646	0.0191017
786	1LP_0AM	0.03	0.255722	1LP	10.76	0.004583	0	SHEAR	58	50.0105	9.34721	0.0282255	9.79022	0.195763
787	1LP_0AM	0.03	0.255722	1LP	10.76	0.004583	0	POSTSHEAR	59	-2.53073e-05	0.636684	0.00932357	0.883615	-34915.4
788	1LP_0AM	0.03	0.255722	1LP	10.76	0.004583	0	PRESHEAR	6	2500.55	48.7685	0.186219	49.1276	0.0196467
789	1LP_0AM	0.03	0.255722	1LP	10.76	0.004583	0	PRESHEAR	60	2500.55	47.1465	0.194812	47.642	0.0190526
790	1LP_0AM	0.03	0.255722	1LP	10.76	0.004583	0	SHEAR	61	25.0055	7.7266	0.0472543	8.48526	0.339336
791	1LP_0AM	0.03	0.255722	1LP	10.76	0.004583	0	POSTSHEAR	62	1.0283e-05	0.754156	0.0124399	0.947279	92120.7
792	1LP_0AM	0.03	0.255722	1LP	10.76	0.004583	0	PRESHEAR	63	2500.55	47.031	0.181543	47.5251	0.0190059
793	1LP_0AM	0.03	0.255722	1LP	10.76	0.004583	0	SHEAR	64	10.002	5.74218	0.0163989	7.27776	0.72763
794	1LP_0AM	0.03	0.255722	1LP	10.76	0.004583	0	SHEAR	7	2250.51	45.711	0.161493	46.0527	0.0204633
795	1LP_0AM	0.03	0.255722	1LP	10.76	0.004583	0	POSTSHEAR	8	7.46727e-07	0.165871	0.00848226	0.209633	280736
796	1LP_0AM	0.03	0.255722	1LP	10.76	0.004583	0	PRESHEAR	9	2500.55	48.5648	0.18613	48.9973	0.0195946
797	1LP_10AM	0.03	0.255722	1LP	10.29	0.004449	10	PRESHEAR	0	2500.32	21.0187	0.0422683	21.1069	0.00844165
798	1LP_10AM	0.03	0.255722	1LP	10.29	0.004449	10	SHEAR	1	2500.3	21.0556	0.0392397	21.1318	0.0084517
799	1LP_10AM	0.03	0.255722	1LP	10.29	0.004449	10	SHEAR	10	1750.2	15.489	0.0370326	15.556	0.00888816
800	1LP_10AM	0.03	0.255722	1LP	10.29	0.004449	10	POSTSHEAR	11	-1.7997e-05	0.0554994	0.0166432	0.101563	-5643.36
801	1LP_10AM	0.03	0.255722	1LP	10.29	0.004449	10	PRESHEAR	12	2500.29	20.9709	0.0441955	21.0898	0.00843494
802	1LP_10AM	0.03	0.255722	1LP	10.29	0.004449	10	SHEAR	13	1500.19	13.5793	0.00989555	13.6276	0.00908391
803	1LP_10AM	0.03	0.255722	1LP	10.29	0.004449	10	POSTSHEAR	14	7.88179e-06	0.0676291	0.0195636	0.108362	13748.4
804	1LP_10AM	0.03	0.255722	1LP	10.29	0.004449	10	PRESHEAR	15	2500.3	20.9319	0.040161	21.0608	0.00842332
805	1LP_10AM	0.03	0.255722	1LP	10.29	0.004449	10	SHEAR	16	1250.15	11.683	0.0205839	11.7278	0.00938113
806	1LP_10AM	0.03	0.255722	1LP	10.29	0.004449	10	POSTSHEAR	17	4.1387e-05	0.079363	0.0351697	0.122692	2964.5
807	1LP_10AM	0.03	0.255722	1LP	10.29	0.004449	10	PRESHEAR	18	2500.3	20.943	0.042677	21.0421	0.00841581
808	1LP_10AM	0.03	0.255722	1LP	10.29	0.004449	10	SHEAR	19	1000.14	9.69517	0.0222593	9.8111	0.00980974
809	1LP_10AM	0.03	0.255722	1LP	10.29	0.004449	10	POSTSHEAR	2	-4.96051e-06	0.00366019	0.0167334	0.0557448	-11237.7
810	1LP_10AM	0.03	0.255722	1LP	10.29	0.004449	10	POSTSHEAR	20	4.03288e-05	0.0636864	0.0184837	0.122978	3049.38
811	1LP_10AM	0.03	0.255722	1LP	10.29	0.004449	10	PRESHEAR	21	2500.33	20.9295	0.0347415	21.0437	0.00841638
812	1LP_10AM	0.03	0.255722	1LP	10.29	0.004449	10	SHEAR	22	750.093	7.70276	0.0158484	7.78633	0.0103805
813	1LP_10AM	0.03	0.255722	1LP	10.29	0.004449	10	POSTSHEAR	23	1.97645e-06	0.0894911	0.0155239	0.145735	73736.1
814	1LP_10AM	0.03	0.255722	1LP	10.29	0.004449	10	PRESHEAR	24	2500.31	20.9013	0.0386283	21.0046	0.00840079
815	1LP_10AM	0.03	0.255722	1LP	10.29	0.004449	10	SHEAR	25	500.055	5.61194	0.0163652	5.71188	0.0114225
816	1LP_10AM	0.03	0.255722	1LP	10.29	0.004449	10	POSTSHEAR	26	-2.3389e-05	0.105309	0.0123725	0.140117	-5990.75
817	1LP_10AM	0.03	0.255722	1LP	10.29	0.004449	10	PRESHEAR	27	2500.29	20.8897	0.0376358	20.9812	0.00839152
818	1LP_10AM	0.03	0.255722	1LP	10.29	0.004449	10	SHEAR	28	250.032	3.42868	0.0153716	3.53924	0.0141551
819	1LP_10AM	0.03	0.255722	1LP	10.29	0.004449	10	POSTSHEAR	29	-2.59193e-05	0.106619	0.0175745	0.14501	-5594.65
820	1LP_10AM	0.03	0.255722	1LP	10.29	0.004449	10	PRESHEAR	3	2500.31	21.0084	0.0387436	21.1233	0.00844827
821	1LP_10AM	0.03	0.255722	1LP	10.29	0.004449	10	PRESHEAR	30	2500.29	20.8617	0.0404846	20.9659	0.00838537
822	1LP_10AM	0.03	0.255722	1LP	10.29	0.004449	10	SHEAR	31	100.013	1.98313	0.0129987	2.05199	0.0205173
823	1LP_10AM	0.03	0.255722	1LP	10.29	0.004449	10	POSTSHEAR	32	1.49766e-05	0.145071	0.0153754	0.193528	12922
824	1LP_10AM	0.03	0.255722	1LP	10.29	0.004449	10	PRESHEAR	33	2500.3	20.7751	0.0416126	20.8767	0.00834967
825	1LP_10AM	0.03	0.255722	1LP	10.29	0.004449	10	SHEAR	34	75.0069	1.70772	0.00845703	1.76443	0.0235236
826	1LP_10AM	0.03	0.255722	1LP	10.29	0.004449	10	POSTSHEAR	35	-2.41642e-05	0.145075	0.0147529	0.189925	-7859.76
827	1LP_10AM	0.03	0.255722	1LP	10.29	0.004449	10	PRESHEAR	36	2500.3	20.8016	0.0444858	20.904	0.00836058
828	1LP_10AM	0.03	0.255722	1LP	10.29	0.004449	10	SHEAR	37	50.0079	1.39085	0.00898889	1.47161	0.0294276
829	1LP_10AM	0.03	0.255722	1LP	10.29	0.004449	10	POSTSHEAR	38	2.16463e-05	0.133258	0.0232382	0.210919	9743.88
830	1LP_10AM	0.03	0.255722	1LP	10.29	0.004449	10	PRESHEAR	39	2500.3	20.7991	0.0394987	20.8795	0.00835082
831	1LP_10AM	0.03	0.255722	1LP	10.29	0.004449	10	SHEAR	4	2250.28	19.2157	0.0388462	19.2875	0.00857113
832	1LP_10AM	0.03	0.255722	1LP	10.29	0.004449	10	SHEAR	40	25.0037	1.05755	0.0169651	1.12547	0.0450122
833	1LP_10AM	0.03	0.255722	1LP	10.29	0.004449	10	POSTSHEAR	41	2.95419e-05	0.128109	0.0205625	0.205353	6951.24
834	1LP_10AM	0.03	0.255722	1LP	10.29	0.004449	10	PRESHEAR	42	2500.33	20.7458	0.0370477	20.8585	0.0083423
835	1LP_10AM	0.03	0.255722	1LP	10.29	0.004449	10	SHEAR	43	9.99855	0.782471	0.02014	0.827443	0.0827563
836	1LP_10AM	0.03	0.255722	1LP	10.29	0.004449	10	POSTSHEAR	44	9.96484e-06	0.145167	0.0193932	0.228392	22919.8
837	1LP_10AM	0.03	0.255722	1LP	10.29	0.004449	10	PRESHEAR	45	2500.3	20.782	0.0354149	20.8499	0.00833897
838	1LP_10AM	0.03	0.255722	1LP	10.29	0.004449	10	SHEAR	46	1.00014	0.355019	0.00823607	0.40038	0.400326
839	1LP_10AM	0.03	0.255722	1LP	10.29	0.004449	10	POSTSHEAR	47	2.82991e-05	0.194091	0.0142199	0.269737	9531.62
840	1LP_10AM	0.03	0.255722	1LP	10.29	0.004449	10	PRESHEAR	48	2500.3	20.7038	0.04347	20.813	0.00832419
841	1LP_10AM	0.03	0.255722	1LP	10.29	0.004449	10	POSTSHEAR	5	1.37988e-05	0.0161934	0.0155374	0.0986125	7146.47
842	1LP_10AM	0.03	0.255722	1LP	10.29	0.004449	10	PRESHEAR	6	2500.32	20.9743	0.0474054	21.096	0.00843734
843	1LP_10AM	0.03	0.255722	1LP	10.29	0.004449	10	SHEAR	7	2000.25	17.3602	0.0271164	17.4295	0.00871366
844	1LP_10AM	0.03	0.255722	1LP	10.29	0.004449	10	POSTSHEAR	8	-2.28953e-05	0.0657342	0.0219306	0.110479	-4825.38
845	1LP_10AM	0.03	0.255722	1LP	10.29	0.004449	10	PRESHEAR	9	2500.3	21.0012	0.0367132	21.079	0.00843057
846	1LP_20AM	0.03	0.255722	1LP	10.21	0.00443	20	PRESHEAR	0	2500.31	17.5444	0.0832211	17.6852	0.00707322
847	1LP_20AM	0.03	0.255722	1LP	10.21	0.00443	20	SHEAR	1	2500.29	17.5708	0.0923466	17.7026	0.00708021
848	1LP_20AM	0.03	0.255722	1LP	10.21	0.00443	20	SHEAR	10	1750.2	12.5924	0.034555	12.6647	0.00723613
849	1LP_20AM	0.03	0.255722	1LP	10.21	0.00443	20	POSTSHEAR	11	-2.1085e-05	-0.0077343	0.0234436	0.0484019	-2295.56
850	1LP_20AM	0.03	0.255722	1LP	10.21	0.00443	20	PRESHEAR	12	2500.29	17.4659	0.0934333	17.6549	0.00706113
851	1LP_20AM	0.03	0.255722	1LP	10.21	0.00443	20	SHEAR	13	1500.18	10.9227	0.0132748	10.9807	0.0073196
852	1LP_20AM	0.03	0.255722	1LP	10.21	0.00443	20	POSTSHEAR	14	-1.35936e-05	-0.0542002	0.0154929	0.000779712	-57.3589
853	1LP_20AM	0.03	0.255722	1LP	10.21	0.00443	20	PRESHEAR	15	2500.3	17.4498	0.0849515	17.5997	0.00703904
854	1LP_20AM	0.03	0.255722	1LP	10.21	0.00443	20	SHEAR	16	1250.16	9.21018	0.0173742	9.28246	0.00742504
855	1LP_20AM	0.03	0.255722	1LP	10.21	0.00443	20	POSTSHEAR	17	3.32816e-05	-0.0362399	0.0242285	0.0138993	417.628
856	1LP_20AM	0.03	0.255722	1LP	10.21	0.00443	20	PRESHEAR	18	2500.3	17.4258	0.0875578	17.5753	0.00702929
857	1LP_20AM	0.03	0.255722	1LP	10.21	0.00443	20	SHEAR	19	1000.13	7.50127	0.0228346	7.57549	0.00757453
858	1LP_20AM	0.03	0.255722	1LP	10.21	0.00443	20	POSTSHEAR	2	2.45108e-05	-0.0315507	0.0237697	0.0407268	1661.59
859	1LP_20AM	0.03	0.255722	1LP	10.21	0.00443	20	POSTSHEAR	20	-7.66259e-05	-0.066477	0.0108633	0.00991937	-129.452
860	1LP_20AM	0.03	0.255722	1LP	10.21	0.00443	20	PRESHEAR	21	2500.29	17.3631	0.0879352	17.5206	0.00700741
861	1LP_20AM	0.03	0.255722	1LP	10.21	0.00443	20	SHEAR	22	750.092	5.78112	0.0305644	5.86291	0.00781626
862	1LP_20AM	0.03	0.255722	1LP	10.21	0.00443	20	POSTSHEAR	23	-4.36156e-06	-0.0260391	0.0265901	0.0231647	-5311.1
863	1LP_20AM	0.03	0.255722	1LP	10.21	0.00443	20	PRESHEAR	24	2500.3	17.3443	0.0983411	17.4983	0.0069985
864	1LP_20AM	0.03	0.255722	1LP	10.21	0.00443	20	SHEAR	25	500.058	4.04967	0.0305959	4.11644	0.00823191
865	1LP_20AM	0.03	0.255722	1LP	10.21	0.00443	20	POSTSHEAR	26	-4.38679e-05	-0.032815	0.0183767	0.0142319	-324.427
866	1LP_20AM	0.03	0.255722	1LP	10.21	0.00443	20	PRESHEAR	27	2500.3	17.303	0.0964758	17.4537	0.00698065
867	1LP_20AM	0.03	0.255722	1LP	10.21	0.00443	20	SHEAR	28	250.034	2.22067	0.0259952	2.29106	0.00916299
868	1LP_20AM	0.03	0.255722	1LP	10.21	0.00443	20	POSTSHEAR	29	-2.9079e-05	-0.0764229	0.0122119	-0.0331975	1141.63
869	1LP_20AM	0.03	0.255722	1LP	10.21	0.00443	20	PRESHEAR	3	2500.29	17.55	0.0892063	17.696	0.00707759
870	1LP_20AM	0.03	0.255722	1LP	10.21	0.00443	20	PRESHEAR	30	2500.3	17.315	0.0876826	17.4489	0.00697872
871	1LP_20AM	0.03	0.255722	1LP	10.21	0.00443	20	SHEAR	31	100.013	1.02133	0.0177129	1.0925	0.0109236
872	1LP_20AM	0.03	0.255722	1LP	10.21	0.00443	20	POSTSHEAR	32	-2.0547e-05	-0.0579617	0.0130417	-0.0160567	781.461
873	1LP_20AM	0.03	0.255722	1LP	10.21	0.00443	20	PRESHEAR	33	2500.3	17.3011	0.0969531	17.449	0.00697877
874	1LP_20AM	0.03	0.255722	1LP	10.21	0.00443	20	SHEAR	34	75.0114	0.810325	0.020668	0.858409	0.0114437
875	1LP_20AM	0.03	0.255722	1LP	10.21	0.00443	20	POSTSHEAR	35	3.55105e-05	-0.0652696	0.0154888	-0.0210853	-593.775
876	1LP_20AM	0.03	0.255722	1LP	10.21	0.00443	20	PRESHEAR	36	2500.3	17.2963	0.0965445	17.4711	0.00698762
877	1LP_20AM	0.03	0.255722	1LP	10.21	0.00443	20	SHEAR	37	50.0027	0.5854	0.021973	0.617465	0.0123486
878	1LP_20AM	0.03	0.255722	1LP	10.21	0.00443	20	POSTSHEAR	38	3.06609e-06	-0.0998348	0.0225982	-0.0269946	-8804.23
879	1LP_20AM	0.03	0.255722	1LP	10.21	0.00443	20	PRESHEAR	39	2500.3	17.2809	0.0906231	17.4239	0.00696871
880	1LP_20AM	0.03	0.255722	1LP	10.21	0.00443	20	SHEAR	4	2250.28	15.8924	0.0746907	16.0609	0.00713727
881	1LP_20AM	0.03	0.255722	1LP	10.21	0.00443	20	SHEAR	40	25.0052	0.327935	0.0126785	0.397969	0.0159154
882	1LP_20AM	0.03	0.255722	1LP	10.21	0.00443	20	POSTSHEAR	41	-6.29725e-06	-0.0644186	0.0172294	-0.0282284	4482.66
883	1LP_20AM	0.03	0.255722	1LP	10.21	0.00443	20	PRESHEAR	42	2500.3	17.305	0.0938961	17.4559	0.00698153
884	1LP_20AM	0.03	0.255722	1LP	10.21	0.00443	20	SHEAR	43	9.9986	0.14009	0.00988694	0.17217	0.0172194
885	1LP_20AM	0.03	0.255722	1LP	10.21	0.00443	20	POSTSHEAR	44	-6.21537e-06	-0.0736915	0.0110233	-0.0266555	4288.64
886	1LP_20AM	0.03	0.255722	1LP	10.21	0.00443	20	PRESHEAR	45	2500.29	17.2475	0.0964268	17.3842	0.00695286
887	1LP_20AM	0.03	0.255722	1LP	10.21	0.00443	20	SHEAR	46	1.00095	-0.0565872	0.0109166	-0.000828963	-0.000828178
888	1LP_20AM	0.03	0.255722	1LP	10.21	0.00443	20	POSTSHEAR	47	-5.14442e-05	-0.0527831	0.00921666	-0.0252353	490.538
889	1LP_20AM	0.03	0.255722	1LP	10.21	0.00443	20	PRESHEAR	48	2500.3	17.1458	0.10248	17.3033	0.00692051
890	1LP_20AM	0.03	0.255722	1LP	10.21	0.00443	20	POSTSHEAR	5	-2.36285e-05	0.000742096	0.0123362	0.0373123	-1579.12
891	1LP_20AM	0.03	0.255722	1LP	10.21	0.00443	20	PRESHEAR	6	2500.3	17.477	0.0913242	17.6349	0.00705312
892	1LP_20AM	0.03	0.255722	1LP	10.21	0.00443	20	SHEAR	7	2000.25	14.231	0.0523735	14.3351	0.00716667
893	1LP_20AM	0.03	0.255722	1LP	10.21	0.00443	20	POSTSHEAR	8	-2.98128e-05	-0.0035593	0.017949	0.029257	-981.358
894	1LP_20AM	0.03	0.255722	1LP	10.21	0.00443	20	PRESHEAR	9	2500.3	17.5027	0.0973716	17.6683	0.00706647
895	1LP_35AM	0.03	0.255722	1LP	10.2	0.004428	35	PRESHEAR	0	2500.3	19.1548	0.0440504	19.2867	0.00771377
896	1LP_35AM	0.03	0.255722	1LP	10.2	0.004428	35	SHEAR	1	2500.31	19.154	0.0363152	19.2764	0.00770961
897	1LP_35AM	0.03	0.255722	1LP	10.2	0.004428	35	SHEAR	10	1750.21	13.1899	0.0199736	13.3353	0.0076193
898	1LP_35AM	0.03	0.255722	1LP	10.2	0.004428	35	POSTSHEAR	11	-5.25152e-05	-0.107112	0.0136165	-0.02787	530.703
899	1LP_35AM	0.03	0.255722	1LP	10.2	0.004428	35	PRESHEAR	12	2500.3	19.007	0.0414759	19.0851	0.00763314
900	1LP_35AM	0.03	0.255722	1LP	10.2	0.004428	35	SHEAR	13	1500.18	11.285	0.0158383	11.4205	0.00761276
901	1LP_35AM	0.03	0.255722	1LP	10.2	0.004428	35	POSTSHEAR	14	-4.22055e-06	-0.107504	0.019367	-0.0545561	12926.3
902	1LP_35AM	0.03	0.255722	1LP	10.2	0.004428	35	PRESHEAR	15	2500.31	19.0296	0.0440654	19.1135	0.00764445
903	1LP_35AM	0.03	0.255722	1LP	10.2	0.004428	35	SHEAR	16	1250.16	9.33156	0.0183043	9.52405	0.00761826
904	1LP_35AM	0.03	0.255722	1LP	10.2	0.004428	35	POSTSHEAR	17	-4.06289e-05	-0.120925	0.0150572	-0.0783247	1927.81
905	1LP_35AM	0.03	0.255722	1LP	10.2	0.004428	35	PRESHEAR	18	2500.32	18.9501	0.0397423	19.039	0.00761465
906	1LP_35AM	0.03	0.255722	1LP	10.2	0.004428	35	SHEAR	19	1000.11	7.41454	0.0166832	7.59851	0.00759766
907	1LP_35AM	0.03	0.255722	1LP	10.2	0.004428	35	POSTSHEAR	2	-1.97238e-05	-0.0365312	0.0160935	0.0369304	-1872.38
908	1LP_35AM	0.03	0.255722	1LP	10.2	0.004428	35	POSTSHEAR	20	-1.89453e-05	-0.145166	0.0154433	-0.0640088	3378.62
909	1LP_35AM	0.03	0.255722	1LP	10.2	0.004428	35	PRESHEAR	21	2500.31	18.9123	0.0408498	18.991	0.00759545
910	1LP_35AM	0.03	0.255722	1LP	10.2	0.004428	35	SHEAR	22	750.084	5.53425	0.0166826	5.6926	0.00758928
911	1LP_35AM	0.03	0.255722	1LP	10.2	0.004428	35	POSTSHEAR	23	2.78916e-05	-0.160145	0.0146849	-0.104918	-3761.62
912	1LP_35AM	0.03	0.255722	1LP	10.2	0.004428	35	PRESHEAR	24	2500.3	18.8521	0.03783	18.9205	0.0075673
913	1LP_35AM	0.03	0.255722	1LP	10.2	0.004428	35	SHEAR	25	500.061	3.80103	0.0223873	3.86638	0.00773183
914	1LP_35AM	0.03	0.255722	1LP	10.2	0.004428	35	POSTSHEAR	26	6.99836e-05	-0.183098	0.01715	-0.117959	-1685.52
915	1LP_35AM	0.03	0.255722	1LP	10.2	0.004428	35	PRESHEAR	27	2500.29	18.7642	0.0406588	18.8556	0.00754136
916	1LP_35AM	0.03	0.255722	1LP	10.2	0.004428	35	SHEAR	28	250.028	1.65483	0.0196902	1.83544	0.00734093
917	1LP_35AM	0.03	0.255722	1LP	10.2	0.004428	35	POSTSHEAR	29	-2.89791e-05	-0.175115	0.00955898	-0.11404	3935.25
918	1LP_35AM	0.03	0.255722	1LP	10.2	0.004428	35	PRESHEAR	3	2500.3	19.1692	0.0428059	19.2452	0.00769717
919	1LP_35AM	0.03	0.255722	1LP	10.2	0.004428	35	PRESHEAR	30	2500.3	18.747	0.042197	18.8071	0.00752194
920	1LP_35AM	0.03	0.255722	1LP	10.2	0.004428	35	SHEAR	31	100.017	0.573624	0.0123813	0.64072	0.0064061
921	1LP_35AM	0.03	0.255722	1LP	10.2	0.004428	35	POSTSHEAR	32	-3.17956e-05	-0.207883	0.0147811	-0.132636	4171.53
922	1LP_35AM	0.03	0.255722	1LP	10.2	0.004428	35	PRESHEAR	33	2500.29	18.7793	0.0431388	18.8676	0.00754615
923	1LP_35AM	0.03	0.255722	1LP	10.2	0.004428	35	SHEAR	34	75.0095	0.332017	0.0154697	0.415337	0.00553713
924	1LP_35AM	0.03	0.255722	1LP	10.2	0.004428	35	POSTSHEAR	35	9.32372e-06	-0.215685	0.0236291	-0.15247	-16352.9
925	1LP_35AM	0.03	0.255722	1LP	10.2	0.004428	35	PRESHEAR	36	2500.3	18.7554	0.0414818	18.841	0.0075355
926	1LP_35AM	0.03	0.255722	1LP	10.2	0.004428	35	SHEAR	37	50.0092	0.138805	0.0146218	0.220615	0.00441149
927	1LP_35AM	0.03	0.255722	1LP	10.2	0.004428	35	POSTSHEAR	38	-4.66762e-05	-0.224208	0.0166989	-0.170744	3658.05
928	1LP_35AM	0.03	0.255722	1LP	10.2	0.004428	35	PRESHEAR	39	2500.3	18.6808	0.038863	18.7607	0.0075034
929	1LP_35AM	0.03	0.255722	1LP	10.2	0.004428	35	SHEAR	4	2250.26	17.2128	0.0342734	17.2922	0.00768453
930	1LP_35AM	0.03	0.255722	1LP	10.2	0.004428	35	SHEAR	40	25.0051	-0.0316016	0.0170435	0.0150497	0.000601864
931	1LP_35AM	0.03	0.255722	1LP	10.2	0.004428	35	POSTSHEAR	41	2.4431e-05	-0.232797	0.0210015	-0.145662	-5962.18
932	1LP_35AM	0.03	0.255722	1LP	10.2	0.004428	35	PRESHEAR	42	2500.31	18.6837	0.0457481	18.7696	0.00750691
933	1LP_35AM	0.03	0.255722	1LP	10.2	0.004428	35	SHEAR	43	9.99859	-0.146367	0.0172371	-0.105914	-0.0105929
934	1LP_35AM	0.03	0.255722	1LP	10.2	0.004428	35	POSTSHEAR	44	-2.20289e-05	-0.250256	0.0138565	-0.195089	8856.03
935	1LP_35AM	0.03	0.255722	1LP	10.2	0.004428	35	PRESHEAR	45	2500.3	18.7427	0.0368723	18.8385	0.00753448
936	1LP_35AM	0.03	0.255722	1LP	10.2	0.004428	35	SHEAR	46	0.999822	-0.220448	0.00961606	-0.160979	-0.161008
937	1LP_35AM	0.03	0.255722	1LP	10.2	0.004428	35	POSTSHEAR	47	1.83909e-05	-0.249066	0.0172981	-0.194418	-10571.4
938	1LP_35AM	0.03	0.255722	1LP	10.2	0.004428	35	PRESHEAR	48	2500.29	18.6439	0.037695	18.7312	0.00749161
939	1LP_35AM	0.03	0.255722	1LP	10.2	0.004428	35	POSTSHEAR	5	-4.32805e-05	-0.04844	0.017496	0.0222023	-512.986
940	1LP_35AM	0.03	0.255722	1LP	10.2	0.004428	35	PRESHEAR	6	2500.31	19.1452	0.0415581	19.2156	0.00768529
941	1LP_35AM	0.03	0.255722	1LP	10.2	0.004428	35	SHEAR	7	2000.23	15.1918	0.0272929	15.3509	0.00767456
942	1LP_35AM	0.03	0.255722	1LP	10.2	0.004428	35	POSTSHEAR	8	-3.88611e-05	-0.0699569	0.0169916	-0.0198894	511.809
943	1LP_35AM	0.03	0.255722	1LP	10.2	0.004428	35	PRESHEAR	9	2500.3	18.9976	0.0413894	19.081	0.00763147
944	2HP_0AM	0.03	0.255722	2HP	20.8	0.013474	0	PRESHEAR	0	2500.54	98.7297	0.322054	100.027	0.0400021
945	2HP_0AM	0.03	0.255722	2HP	20.8	0.013474	0	SHEAR	1	2500.54	98.1138	0.389545	99.051	0.0396119
946	2HP_0AM	0.03	0.255722	2HP	20.8	0.013474	0	SHEAR	10	1850.41	77.4073	0.13913	77.6683	0.0419735
947	2HP_0AM	0.03	0.255722	2HP	20.8	0.013474	0	POSTSHEAR	11	1.06786e-05	-1.09512	0.00752323	-0.962505	-90134.4
948	2HP_0AM	0.03	0.255722	2HP	20.8	0.013474	0	PRESHEAR	12	2500.55	96.9236	0.344594	98.1148	0.0392373
949	2HP_0AM	0.03	0.255722	2HP	20.8	0.013474	0	SHEAR	13	1750.39	74.1768	0.118263	74.3398	0.0424705
950	2HP_0AM	0.03	0.255722	2HP	20.8	0.013474	0	POSTSHEAR	14	-2.44142e-05	-1.22857	0.0111352	-1.12271	45986
951	2HP_0AM	0.03	0.255722	2HP	20.8	0.013474	0	PRESHEAR	15	2500.57	96.7275	0.337204	97.9371	0.039166
952	2HP_0AM	0.03	0.255722	2HP	20.8	0.013474	0	SHEAR	16	1600.36	69.2572	0.0687494	69.3832	0.0433547
953	2HP_0AM	0.03	0.255722	2HP	20.8	0.013474	0	POSTSHEAR	17	1.29709e-05	-1.27741	0.00841425	-1.18161	-91096.6
954	2HP_0AM	0.03	0.255722	2HP	20.8	0.013474	0	PRESHEAR	18	2500.56	96.5416	0.377876	97.73	0.0390833
955	2HP_0AM	0.03	0.255722	2HP	20.8	0.013474	0	SHEAR	19	1500.34	65.9528	0.0361719	66.0397	0.0440164
956	2HP_0AM	0.03	0.255722	2HP	20.8	0.013474	0	POSTSHEAR	2	-1.39496e-05	-0.760007	0.011443	-0.623403	44689.5
957	2HP_0AM	0.03	0.255722	2HP	20.8	0.013474	0	POSTSHEAR	20	-1.14463e-05	-1.40785	0.00995815	-1.29272	112937
958	2HP_0AM	0.03	0.255722	2HP	20.8	0.013474	0	PRESHEAR	21	2500.55	96.3575	0.340374	97.5997	0.0390314
959	2HP_0AM	0.03	0.255722	2HP	20.8	0.013474	0	SHEAR	22	1400.32	62.6259	0.0114722	62.664	0.0447497
960	2HP_0AM	0.03	0.255722	2HP	20.8	0.013474	0	POSTSHEAR	23	-1.06799e-05	-1.49073	0.00810735	-1.37865	129088
961	2HP_0AM	0.03	0.255722	2HP	20.8	0.013474	0	PRESHEAR	24	2500.54	96.2453	0.318512	97.459	0.0389752
962	2HP_0AM	0.03	0.255722	2HP	20.8	0.013474	0	SHEAR	25	1250.28	57.6831	0.0341917	57.7454	0.046186
963	2HP_0AM	0.03	0.255722	2HP	20.8	0.013474	0	POSTSHEAR	26	-4.36394e-05	-1.55293	0.00770189	-1.44773	33174.9
964	2HP_0AM	0.03	0.255722	2HP	20.8	0.013474	0	PRESHEAR	27	2500.57	96.1574	0.352135	97.2732	0.0389004
965	2HP_0AM	0.03	0.255722	2HP	20.8	0.013474	0	SHEAR	28	1000.21	49.2724	0.0758324	49.3887	0.0493781
966	2HP_0AM	0.03	0.255722	2HP	20.8	0.013474	0	POSTSHEAR	29	-1.34834e-05	-1.55315	0.00864217	-1.47846	109650
967	2HP_0AM	0.03	0.255722	2HP	20.8	0.013474	0	PRESHEAR	3	2500.56	97.7226	0.367021	99.0477	0.0396102
968	2HP_0AM	0.03	0.255722	2HP	20.8	0.013474	0	PRESHEAR	30	2500.55	95.7865	0.322044	97.2435	0.0388889
969	2HP_0AM	0.03	0.255722	2HP	20.8	0.013474	0	SHEAR	31	750.165	40.4569	0.105207	40.6113	0.0541365
970	2HP_0AM	0.03	0.255722	2HP	20.8	0.013474	0	POSTSHEAR	32	1.22189e-05	-1.67184	0.0105089	-1.55782	-127493
971	2HP_0AM	0.03	0.255722	2HP	20.8	0.013474	0	PRESHEAR	33	2500.54	95.878	0.354192	97.2201	0.0388796
972	2HP_0AM	0.03	0.255722	2HP	20.8	0.013474	0	SHEAR	34	600.133	34.9188	0.10649	35.0648	0.0584284
973	2HP_0AM	0.03	0.255722	2HP	20.8	0.013474	0	POSTSHEAR	35	1.43608e-05	-1.72819	0.0217541	-1.60845	-112003
974	2HP_0AM	0.03	0.255722	2HP	20.8	0.013474	0	PRESHEAR	36	2500.57	95.7092	0.358973	96.9559	0.0387736
975	2HP_0AM	0.03	0.255722	2HP	20.8	0.013474	0	SHEAR	37	500.112	30.9502	0.0915033	31.1595	0.062305
976	2HP_0AM	0.03	0.255722	2HP	20.8	0.013474	0	POSTSHEAR	38	-3.23862e-05	-1.69913	0.0122821	-1.63492	50482
977	2HP_0AM	0.03	0.255722	2HP	20.8	0.013474	0	PRESHEAR	39	2500.57	95.5756	0.325981	96.9502	0.0387713
978	2HP_0AM	0.03	0.255722	2HP	20.8	0.013474	0	SHEAR	4	2250.51	90.1967	0.281625	90.6741	0.0402905
979	2HP_0AM	0.03	0.255722	2HP	20.8	0.013474	0	SHEAR	40	400.089	26.8935	0.102376	27.0568	0.067627
980	2HP_0AM	0.03	0.255722	2HP	20.8	0.013474	0	POSTSHEAR	41	-4.31388e-05	-1.74679	0.00999232	-1.63568	37916.7
981	2HP_0AM	0.03	0.255722	2HP	20.8	0.013474	0	PRESHEAR	42	2500.56	95.3977	0.35631	96.8332	0.0387246
982	2HP_0AM	0.03	0.255722	2HP	20.8	0.013474	0	SHEAR	43	250.056	20.3023	0.0723698	20.4224	0.0816714
983	2HP_0AM	0.03	0.255722	2HP	20.8	0.013474	0	POSTSHEAR	44	-7.88183e-06	-1.71177	0.0163539	-1.61807	205291
984	2HP_0AM	0.03	0.255722	2HP	20.8	0.013474	0	PRESHEAR	45	2500.55	95.267	0.328413	96.6517	0.0386521
985	2HP_0AM	0.03	0.255722	2HP	20.8	0.013474	0	SHEAR	46	200.047	17.8134	0.0660006	17.9397	0.0896776
986	2HP_0AM	0.03	0.255722	2HP	20.8	0.013474	0	POSTSHEAR	47	2.82723e-05	-1.74499	0.00966816	-1.63473	-57820.8
987	2HP_0AM	0.03	0.255722	2HP	20.8	0.013474	0	PRESHEAR	48	2500.55	95.2724	0.343324	96.4329	0.0385647
988	2HP_0AM	0.03	0.255722	2HP	20.8	0.013474	0	SHEAR	49	100.023	12.3398	0.0467547	12.4653	0.124625
989	2HP_0AM	0.03	0.255722	2HP	20.8	0.013474	0	POSTSHEAR	5	5.36653e-07	-0.910984	0.00856149	-0.790198	-1.47246e+06
990	2HP_0AM	0.03	0.255722	2HP	20.8	0.013474	0	POSTSHEAR	50	-3.01751e-07	-1.45631	0.00819965	-1.30168	4.31376e+06
991	2HP_0AM	0.03	0.255722	2HP	20.8	0.013474	0	PRESHEAR	51	2500.55	95.2315	0.343259	96.2775	0.0385025
992	2HP_0AM	0.03	0.255722	2HP	20.8	0.013474	0	SHEAR	52	75.0161	10.6708	0.0397548	10.7931	0.143878
993	2HP_0AM	0.03	0.255722	2HP	20.8	0.013474	0	POSTSHEAR	53	-3.42678e-05	-1.41967	0.0161286	-1.22476	35740.9
994	2HP_0AM	0.03	0.255722	2HP	20.8	0.013474	0	PRESHEAR	54	2500.57	94.9968	0.324178	96.1339	0.0384448
995	2HP_0AM	0.03	0.255722	2HP	20.8	0.013474	0	SHEAR	55	50.0095	8.77079	0.0321858	8.9707	0.17938
996	2HP_0AM	0.03	0.255722	2HP	20.8	0.013474	0	POSTSHEAR	56	3.93511e-06	-1.50449	0.00978984	-1.3615	-345988
997	2HP_0AM	0.03	0.255722	2HP	20.8	0.013474	0	PRESHEAR	57	2500.56	94.8935	0.306598	96.0254	0.0384016
998	2HP_0AM	0.03	0.255722	2HP	20.8	0.013474	0	SHEAR	58	25.0039	6.52965	0.025616	6.79942	0.271935
999	2HP_0AM	0.03	0.255722	2HP	20.8	0.013474	0	POSTSHEAR	59	-2.48641e-05	-1.24289	0.01249	-1.04035	41841.3
1000	2HP_0AM	0.03	0.255722	2HP	20.8	0.013474	0	PRESHEAR	6	2500.53	97.5418	0.342309	98.5627	0.0394167
1001	2HP_0AM	0.03	0.255722	2HP	20.8	0.013474	0	PRESHEAR	60	2500.55	94.9203	0.298773	95.9205	0.0383598
1002	2HP_0AM	0.03	0.255722	2HP	20.8	0.013474	0	SHEAR	61	10.0036	4.54865	0.00753203	4.79337	0.479166
1003	2HP_0AM	0.03	0.255722	2HP	20.8	0.013474	0	POSTSHEAR	62	8.55165e-06	-1.02966	0.00994596	-0.866158	-101285
1004	2HP_0AM	0.03	0.255722	2HP	20.8	0.013474	0	SHEAR	7	2000.46	82.2679	0.200918	82.5897	0.0412854
1005	2HP_0AM	0.03	0.255722	2HP	20.8	0.013474	0	POSTSHEAR	8	9.1099e-06	-1.00944	0.0086054	-0.885254	-97174.9
1006	2HP_0AM	0.03	0.255722	2HP	20.8	0.013474	0	PRESHEAR	9	2500.54	97.2361	0.343269	98.4062	0.039354
1007	2HP_10AM	0.03	0.255722	2HP	20.52	0.01325	10	PRESHEAR	0	2500.3	84.5732	0.405142	85.5722	0.0342248
1008	2HP_10AM	0.03	0.255722	2HP	20.52	0.01325	10	SHEAR	1	2500.29	84.3714	0.423464	85.1624	0.0340611
1009	2HP_10AM	0.03	0.255722	2HP	20.52	0.01325	10	SHEAR	10	1750.2	62.0776	0.139026	62.4399	0.0356759
1010	2HP_10AM	0.03	0.255722	2HP	20.52	0.01325	10	POSTSHEAR	11	2.12412e-05	0.195809	0.00830906	0.271541	12783.7
1011	2HP_10AM	0.03	0.255722	2HP	20.52	0.01325	10	PRESHEAR	12	2500.31	83.6237	0.418208	84.4072	0.0337587
1012	2HP_10AM	0.03	0.255722	2HP	20.52	0.01325	10	SHEAR	13	1500.18	54.5846	0.0396315	54.778	0.0365142
1013	2HP_10AM	0.03	0.255722	2HP	20.52	0.01325	10	POSTSHEAR	14	5.37637e-06	0.224207	0.0100422	0.284014	52826.4
1014	2HP_10AM	0.03	0.255722	2HP	20.52	0.01325	10	PRESHEAR	15	2500.31	83.2707	0.354847	84.1674	0.0336628
1015	2HP_10AM	0.03	0.255722	2HP	20.52	0.01325	10	SHEAR	16	1250.15	47.0812	0.0410248	47.174	0.0377348
1016	2HP_10AM	0.03	0.255722	2HP	20.52	0.01325	10	POSTSHEAR	17	-2.83339e-05	0.331	0.0152703	0.368757	-13014.7
1017	2HP_10AM	0.03	0.255722	2HP	20.52	0.01325	10	PRESHEAR	18	2500.3	83.1262	0.390112	84.0505	0.0336162
1018	2HP_10AM	0.03	0.255722	2HP	20.52	0.01325	10	SHEAR	19	1000.12	39.3597	0.0874086	39.5019	0.0394972
1019	2HP_10AM	0.03	0.255722	2HP	20.52	0.01325	10	POSTSHEAR	2	1.76572e-05	0.0784789	0.00877991	0.112373	6364.13
1020	2HP_10AM	0.03	0.255722	2HP	20.52	0.01325	10	POSTSHEAR	20	-2.54774e-05	0.285397	0.00999099	0.344563	-13524.3
1021	2HP_10AM	0.03	0.255722	2HP	20.52	0.01325	10	PRESHEAR	21	2500.28	82.982	0.419402	83.8285	0.0335276
1022	2HP_10AM	0.03	0.255722	2HP	20.52	0.01325	10	SHEAR	22	750.088	31.428	0.10797	31.6416	0.0421839
1023	2HP_10AM	0.03	0.255722	2HP	20.52	0.01325	10	POSTSHEAR	23	-1.13658e-05	0.324083	0.0274523	0.371765	-32709
1024	2HP_10AM	0.03	0.255722	2HP	20.52	0.01325	10	PRESHEAR	24	2500.3	82.9062	0.377933	83.7917	0.0335127
1025	2HP_10AM	0.03	0.255722	2HP	20.52	0.01325	10	SHEAR	25	500.061	23.2613	0.10515	23.4295	0.0468532
1026	2HP_10AM	0.03	0.255722	2HP	20.52	0.01325	10	POSTSHEAR	26	-6.82511e-06	0.35383	0.0186081	0.411233	-60253
1027	2HP_10AM	0.03	0.255722	2HP	20.52	0.01325	10	PRESHEAR	27	2500.29	82.79	0.395891	83.7106	0.0334804
1028	2HP_10AM	0.03	0.255722	2HP	20.52	0.01325	10	SHEAR	28	250.039	14.3453	0.0740371	14.4811	0.0579154
1029	2HP_10AM	0.03	0.255722	2HP	20.52	0.01325	10	POSTSHEAR	29	-1.47887e-05	0.436042	0.00843849	0.453877	-30690.9
1030	2HP_10AM	0.03	0.255722	2HP	20.52	0.01325	10	PRESHEAR	3	2500.3	84.2752	0.420365	85.2394	0.0340917
1031	2HP_10AM	0.03	0.255722	2HP	20.52	0.01325	10	PRESHEAR	30	2500.28	82.7115	0.383261	83.6406	0.0334524
1032	2HP_10AM	0.03	0.255722	2HP	20.52	0.01325	10	SHEAR	31	100.016	8.26018	0.0370658	8.39237	0.0839107
1033	2HP_10AM	0.03	0.255722	2HP	20.52	0.01325	10	POSTSHEAR	32	2.00201e-05	0.445585	0.0104018	0.532918	26619.2
1034	2HP_10AM	0.03	0.255722	2HP	20.52	0.01325	10	PRESHEAR	33	2500.3	82.5861	0.391159	83.5166	0.0334027
1035	2HP_10AM	0.03	0.255722	2HP	20.52	0.01325	10	SHEAR	34	75.0096	7.05781	0.0309743	7.15543	0.0953935
1036	2HP_10AM	0.03	0.255722	2HP	20.52	0.01325	10	POSTSHEAR	35	1.17946e-05	0.526286	0.0153055	0.560611	47531.2
1037	2HP_10AM	0.03	0.255722	2HP	20.52	0.01325	10	PRESHEAR	36	2500.29	82.5945	0.380842	83.4883	0.0333914
1038	2HP_10AM	0.03	0.255722	2HP	20.52	0.01325	10	SHEAR	37	50.0062	5.80738	0.0213392	5.96234	0.119232
1039	2HP_10AM	0.03	0.255722	2HP	20.52	0.01325	10	POSTSHEAR	38	-2.76054e-05	0.567718	0.0111484	0.601347	-21783.6
1040	2HP_10AM	0.03	0.255722	2HP	20.52	0.01325	10	PRESHEAR	39	2500.3	82.5416	0.37717	83.4171	0.0333628
1041	2HP_10AM	0.03	0.255722	2HP	20.52	0.01325	10	SHEAR	4	2250.27	76.8958	0.360662	77.5986	0.0344842
1042	2HP_10AM	0.03	0.255722	2HP	20.52	0.01325	10	SHEAR	40	25.0039	4.36667	0.017376	4.46735	0.178666
1043	2HP_10AM	0.03	0.255722	2HP	20.52	0.01325	10	POSTSHEAR	41	1.09442e-06	0.627778	0.00981133	0.657322	600612
1044	2HP_10AM	0.03	0.255722	2HP	20.52	0.01325	10	PRESHEAR	42	2500.31	82.5484	0.408283	83.4023	0.0333568
1045	2HP_10AM	0.03	0.255722	2HP	20.52	0.01325	10	SHEAR	43	10.0009	3.30688	0.0106293	3.35456	0.335425
1046	2HP_10AM	0.03	0.255722	2HP	20.52	0.01325	10	POSTSHEAR	44	-1.10734e-05	0.682147	0.00834101	0.744041	-67191.5
1047	2HP_10AM	0.03	0.255722	2HP	20.52	0.01325	10	PRESHEAR	45	2500.29	82.4737	0.395959	83.3668	0.0333428
1048	2HP_10AM	0.03	0.255722	2HP	20.52	0.01325	10	SHEAR	46	1.00036	1.67756	0.00775281	1.69492	1.69432
1049	2HP_10AM	0.03	0.255722	2HP	20.52	0.01325	10	POSTSHEAR	47	-4.8758e-06	0.714495	0.0184465	0.817821	-167731
1050	2HP_10AM	0.03	0.255722	2HP	20.52	0.01325	10	PRESHEAR	48	2500.32	82.4396	0.39163	83.2722	0.0333047
1051	2HP_10AM	0.03	0.255722	2HP	20.52	0.01325	10	POSTSHEAR	5	-2.19321e-06	0.146806	0.00827713	0.176817	-80620.3
1052	2HP_10AM	0.03	0.255722	2HP	20.52	0.01325	10	PRESHEAR	6	2500.31	84.0647	0.432666	85.0063	0.0339983
1053	2HP_10AM	0.03	0.255722	2HP	20.52	0.01325	10	SHEAR	7	2000.26	69.4542	0.242946	70.0747	0.0350328
1054	2HP_10AM	0.03	0.255722	2HP	20.52	0.01325	10	POSTSHEAR	8	-5.79971e-05	0.162325	0.0217663	0.209729	-3616.2
1055	2HP_10AM	0.03	0.255722	2HP	20.52	0.01325	10	PRESHEAR	9	2500.3	83.7851	0.433203	84.72	0.0338839
1056	2HP_20AM	0.03	0.255722	2HP	20.58	0.013298	20	PRESHEAR	0	2500.31	65.7165	0.286403	66.3322	0.0265296
1057	2HP_20AM	0.03	0.255722	2HP	20.58	0.013298	20	SHEAR	1	2500.29	65.7018	0.284173	66.1441	0.0264546
1058	2HP_20AM	0.03	0.255722	2HP	20.58	0.013298	20	SHEAR	10	1750.21	48.7355	0.0904428	48.8904	0.027934
1059	2HP_20AM	0.03	0.255722	2HP	20.58	0.013298	20	POSTSHEAR	11	-1.5403e-05	-0.00819281	0.0145186	0.0418266	-2715.48
1060	2HP_20AM	0.03	0.255722	2HP	20.58	0.013298	20	PRESHEAR	12	2500.28	65.3697	0.286819	66.2384	0.0264924
1061	2HP_20AM	0.03	0.255722	2HP	20.58	0.013298	20	SHEAR	13	1500.15	42.8094	0.0311011	42.8743	0.0285801
1062	2HP_20AM	0.03	0.255722	2HP	20.58	0.013298	20	POSTSHEAR	14	2.43105e-05	-0.00599693	0.0140001	0.0346796	1426.53
1063	2HP_20AM	0.03	0.255722	2HP	20.58	0.013298	20	PRESHEAR	15	2500.32	65.2676	0.275042	66.1367	0.0264513
1064	2HP_20AM	0.03	0.255722	2HP	20.58	0.013298	20	SHEAR	16	1250.16	36.7821	0.0328009	36.8391	0.0294675
1065	2HP_20AM	0.03	0.255722	2HP	20.58	0.013298	20	POSTSHEAR	17	-4.79031e-06	-0.0221032	0.0195106	0.0277743	-5798.01
1066	2HP_20AM	0.03	0.255722	2HP	20.58	0.013298	20	PRESHEAR	18	2500.32	65.1613	0.262893	66.158	0.0264598
1067	2HP_20AM	0.03	0.255722	2HP	20.58	0.013298	20	SHEAR	19	1000.11	30.6429	0.0700955	30.7522	0.0307487
1068	2HP_20AM	0.03	0.255722	2HP	20.58	0.013298	20	POSTSHEAR	2	4.06245e-05	-0.00789674	0.0123721	0.0412557	1015.54
1069	2HP_20AM	0.03	0.255722	2HP	20.58	0.013298	20	POSTSHEAR	20	2.18668e-05	-0.0355038	0.0195828	0.00222882	101.927
1070	2HP_20AM	0.03	0.255722	2HP	20.58	0.013298	20	PRESHEAR	21	2500.3	64.9801	0.281208	65.9604	0.026381
1071	2HP_20AM	0.03	0.255722	2HP	20.58	0.013298	20	SHEAR	22	750.094	24.2453	0.0721443	24.3751	0.032496
1072	2HP_20AM	0.03	0.255722	2HP	20.58	0.013298	20	POSTSHEAR	23	-3.50218e-05	-0.0396373	0.0218819	0.012884	-367.885
1073	2HP_20AM	0.03	0.255722	2HP	20.58	0.013298	20	PRESHEAR	24	2500.27	64.8514	0.258862	65.7923	0.026314
1074	2HP_20AM	0.03	0.255722	2HP	20.58	0.013298	20	SHEAR	25	500.07	17.6238	0.0693687	17.7438	0.0354827
1075	2HP_20AM	0.03	0.255722	2HP	20.58	0.013298	20	POSTSHEAR	26	4.02645e-06	-0.0242152	0.0112504	0.0267332	6639.4
1076	2HP_20AM	0.03	0.255722	2HP	20.58	0.013298	20	PRESHEAR	27	2500.27	64.7351	0.2928	65.7393	0.0262929
1077	2HP_20AM	0.03	0.255722	2HP	20.58	0.013298	20	SHEAR	28	250.03	10.4778	0.0447939	10.6159	0.0424586
1078	2HP_20AM	0.03	0.255722	2HP	20.58	0.013298	20	POSTSHEAR	29	1.58665e-05	-0.0164809	0.0140873	0.0262241	1652.8
1079	2HP_20AM	0.03	0.255722	2HP	20.58	0.013298	20	PRESHEAR	3	2500.3	65.6812	0.260044	66.28	0.0265088
1080	2HP_20AM	0.03	0.255722	2HP	20.58	0.013298	20	PRESHEAR	30	2500.32	64.6358	0.273405	65.358	0.0261399
1081	2HP_20AM	0.03	0.255722	2HP	20.58	0.013298	20	SHEAR	31	100.013	5.61656	0.0283359	5.78005	0.0577932
1082	2HP_20AM	0.03	0.255722	2HP	20.58	0.013298	20	POSTSHEAR	32	2.2917e-05	-0.0442969	0.0124974	0.0046375	202.361
1083	2HP_20AM	0.03	0.255722	2HP	20.58	0.013298	20	PRESHEAR	33	2500.31	64.5319	0.273779	65.0832	0.02603
1084	2HP_20AM	0.03	0.255722	2HP	20.58	0.013298	20	SHEAR	34	75.006	4.68245	0.0208122	4.82671	0.064351
1085	2HP_20AM	0.03	0.255722	2HP	20.58	0.013298	20	POSTSHEAR	35	-6.94193e-05	-0.0149226	0.0131997	0.0171407	-246.916
1086	2HP_20AM	0.03	0.255722	2HP	20.58	0.013298	20	PRESHEAR	36	2500.27	64.4654	0.268165	64.9948	0.0259951
1087	2HP_20AM	0.03	0.255722	2HP	20.58	0.013298	20	SHEAR	37	50.0075	3.67888	0.0220062	3.80149	0.0760185
1088	2HP_20AM	0.03	0.255722	2HP	20.58	0.013298	20	POSTSHEAR	38	3.45701e-05	-0.0441928	0.0172467	0.00702018	203.071
1089	2HP_20AM	0.03	0.255722	2HP	20.58	0.013298	20	PRESHEAR	39	2500.29	64.3085	0.275822	64.8609	0.0259413
1090	2HP_20AM	0.03	0.255722	2HP	20.58	0.013298	20	SHEAR	4	2250.25	60.1742	0.238098	60.5066	0.0268889
1091	2HP_20AM	0.03	0.255722	2HP	20.58	0.013298	20	SHEAR	40	25.0083	2.58601	0.0150911	2.66587	0.1066
1092	2HP_20AM	0.03	0.255722	2HP	20.58	0.013298	20	POSTSHEAR	41	3.40479e-05	-0.049808	0.0181787	-0.000226982	-6.66655
1093	2HP_20AM	0.03	0.255722	2HP	20.58	0.013298	20	PRESHEAR	42	2500.3	64.2896	0.272353	64.9057	0.0259591
1094	2HP_20AM	0.03	0.255722	2HP	20.58	0.013298	20	SHEAR	43	9.99978	1.75696	0.0191868	1.79603	0.179607
1095	2HP_20AM	0.03	0.255722	2HP	20.58	0.013298	20	POSTSHEAR	44	2.09608e-05	-0.0217444	0.0121625	0.0123218	587.848
1096	2HP_20AM	0.03	0.255722	2HP	20.58	0.013298	20	PRESHEAR	45	2500.32	64.3228	0.257977	64.8778	0.0259478
1097	2HP_20AM	0.03	0.255722	2HP	20.58	0.013298	20	SHEAR	46	0.999753	0.633442	0.0195546	0.68522	0.68539
1098	2HP_20AM	0.03	0.255722	2HP	20.58	0.013298	20	POSTSHEAR	47	-8.64969e-06	-0.029639	0.0140393	0.0935577	-10816.3
1099	2HP_20AM	0.03	0.255722	2HP	20.58	0.013298	20	PRESHEAR	48	2500.28	64.1597	0.287054	64.784	0.0259107
1100	2HP_20AM	0.03	0.255722	2HP	20.58	0.013298	20	POSTSHEAR	5	-2.35991e-05	-0.0251698	0.0148325	0.0424468	-1798.66
1101	2HP_20AM	0.03	0.255722	2HP	20.58	0.013298	20	PRESHEAR	6	2500.32	65.5868	0.267842	66.3558	0.026539
1102	2HP_20AM	0.03	0.255722	2HP	20.58	0.013298	20	SHEAR	7	2000.26	54.522	0.168993	54.767	0.02738
1103	2HP_20AM	0.03	0.255722	2HP	20.58	0.013298	20	POSTSHEAR	8	5.22682e-05	0.0106187	0.0213011	0.0431352	825.267
1104	2HP_20AM	0.03	0.255722	2HP	20.58	0.013298	20	PRESHEAR	9	2500.31	65.461	0.244155	66.2583	0.0265001
1105	2HP_35AM	0.03	0.255722	2HP	20.55	0.013274	35	PRESHEAR	0	2500.28	66.7326	0.110566	66.9037	0.0267584
1106	2HP_35AM	0.03	0.255722	2HP	20.55	0.013274	35	SHEAR	1	2500.29	67.1021	0.10841	67.2685	0.0269043
1107	2HP_35AM	0.03	0.255722	2HP	20.55	0.013274	35	SHEAR	10	1750.21	48.162	0.0450744	48.2528	0.0275698
1108	2HP_35AM	0.03	0.255722	2HP	20.55	0.013274	35	POSTSHEAR	11	4.16561e-05	-0.137712	0.0277316	-0.0745443	-1789.52
1109	2HP_35AM	0.03	0.255722	2HP	20.55	0.013274	35	PRESHEAR	12	2500.3	66.2161	0.101779	66.3916	0.0265535
1110	2HP_35AM	0.03	0.255722	2HP	20.55	0.013274	35	SHEAR	13	1500.19	41.7453	0.0134919	41.7746	0.0278462
1111	2HP_35AM	0.03	0.255722	2HP	20.55	0.013274	35	POSTSHEAR	14	-3.38632e-05	-0.143989	0.0192599	-0.0938804	2772.34
1112	2HP_35AM	0.03	0.255722	2HP	20.55	0.013274	35	PRESHEAR	15	2500.3	66.0331	0.0990467	66.1884	0.0264722
1113	2HP_35AM	0.03	0.255722	2HP	20.55	0.013274	35	SHEAR	16	1250.13	35.2741	0.0198852	35.3204	0.0282534
1114	2HP_35AM	0.03	0.255722	2HP	20.55	0.013274	35	POSTSHEAR	17	3.61455e-05	-0.22038	0.0322044	-0.12223	-3381.62
1115	2HP_35AM	0.03	0.255722	2HP	20.55	0.013274	35	PRESHEAR	18	2500.3	65.8423	0.0992826	65.997	0.0263957
1116	2HP_35AM	0.03	0.255722	2HP	20.55	0.013274	35	SHEAR	19	1000.12	28.716	0.0294039	28.794	0.0287905
1117	2HP_35AM	0.03	0.255722	2HP	20.55	0.013274	35	POSTSHEAR	2	-1.18387e-05	-0.05444	0.0158016	0.0140547	-1187.18
1118	2HP_35AM	0.03	0.255722	2HP	20.55	0.013274	35	POSTSHEAR	20	-9.38452e-06	-0.209145	0.0150741	-0.152912	16294.1
1119	2HP_35AM	0.03	0.255722	2HP	20.55	0.013274	35	PRESHEAR	21	2500.31	65.6193	0.107083	65.8185	0.0263242
1120	2HP_35AM	0.03	0.255722	2HP	20.55	0.013274	35	SHEAR	22	750.09	22.1026	0.0357258	22.1871	0.0295793
1121	2HP_35AM	0.03	0.255722	2HP	20.55	0.013274	35	POSTSHEAR	23	2.65278e-05	-0.213206	0.0173221	-0.1568	-5910.79
1122	2HP_35AM	0.03	0.255722	2HP	20.55	0.013274	35	PRESHEAR	24	2500.3	65.4265	0.106848	65.6037	0.0262383
1123	2HP_35AM	0.03	0.255722	2HP	20.55	0.013274	35	SHEAR	25	500.051	15.3977	0.0309717	15.466	0.0309289
1124	2HP_35AM	0.03	0.255722	2HP	20.55	0.013274	35	POSTSHEAR	26	-1.6962e-05	-0.274865	0.0155188	-0.213618	12593.9
1125	2HP_35AM	0.03	0.255722	2HP	20.55	0.013274	35	PRESHEAR	27	2500.3	65.2092	0.106809	65.377	0.0261477
1126	2HP_35AM	0.03	0.255722	2HP	20.55	0.013274	35	SHEAR	28	250.033	8.31857	0.0253919	8.36349	0.0334496
1127	2HP_35AM	0.03	0.255722	2HP	20.55	0.013274	35	POSTSHEAR	29	-3.54734e-05	-0.329651	0.028781	-0.261313	7366.44
1128	2HP_35AM	0.03	0.255722	2HP	20.55	0.013274	35	PRESHEAR	3	2500.31	66.8006	0.10579	66.9791	0.0267883
1129	2HP_35AM	0.03	0.255722	2HP	20.55	0.013274	35	PRESHEAR	30	2500.31	65.0406	0.109383	65.2153	0.0260829
1130	2HP_35AM	0.03	0.255722	2HP	20.55	0.013274	35	SHEAR	31	100.013	3.39735	0.017157	3.52843	0.0352795
1131	2HP_35AM	0.03	0.255722	2HP	20.55	0.013274	35	POSTSHEAR	32	2.66421e-05	-0.336348	0.0233071	-0.265199	-9954.13
1132	2HP_35AM	0.03	0.255722	2HP	20.55	0.013274	35	PRESHEAR	33	2500.3	64.8403	0.109357	65.0287	0.0260084
1133	2HP_35AM	0.03	0.255722	2HP	20.55	0.013274	35	SHEAR	34	75.0103	2.48858	0.0124431	2.68037	0.0357334
1134	2HP_35AM	0.03	0.255722	2HP	20.55	0.013274	35	POSTSHEAR	35	-3.50872e-05	-0.365845	0.0187653	-0.301373	8589.26
1135	2HP_35AM	0.03	0.255722	2HP	20.55	0.013274	35	PRESHEAR	36	2500.31	64.738	0.101629	64.9186	0.0259643
1136	2HP_35AM	0.03	0.255722	2HP	20.55	0.013274	35	SHEAR	37	50.01	1.69699	0.0193398	1.84686	0.0369298
1137	2HP_35AM	0.03	0.255722	2HP	20.55	0.013274	35	POSTSHEAR	38	7.81372e-07	-0.372352	0.0199616	-0.303019	-387805
1138	2HP_35AM	0.03	0.255722	2HP	20.55	0.013274	35	PRESHEAR	39	2500.3	64.6543	0.101043	64.8117	0.0259216
1139	2HP_35AM	0.03	0.255722	2HP	20.55	0.013274	35	SHEAR	4	2250.29	60.8453	0.0916026	61.0029	0.0271089
1140	2HP_35AM	0.03	0.255722	2HP	20.55	0.013274	35	SHEAR	40	25.0021	0.796849	0.015328	0.903578	0.0361401
1141	2HP_35AM	0.03	0.255722	2HP	20.55	0.013274	35	POSTSHEAR	41	1.24205e-05	-0.41814	0.0313168	-0.330681	-26623.8
1142	2HP_35AM	0.03	0.255722	2HP	20.55	0.013274	35	PRESHEAR	42	2500.32	64.554	0.111187	64.7245	0.0258865
1143	2HP_35AM	0.03	0.255722	2HP	20.55	0.013274	35	SHEAR	43	10.0033	0.15765	0.0231538	0.226687	0.0226612
1144	2HP_35AM	0.03	0.255722	2HP	20.55	0.013274	35	POSTSHEAR	44	1.51757e-05	-0.415622	0.0239298	-0.34251	-22569.6
1145	2HP_35AM	0.03	0.255722	2HP	20.55	0.013274	35	PRESHEAR	45	2500.3	64.4524	0.10915	64.6552	0.025859
1146	2HP_35AM	0.03	0.255722	2HP	20.55	0.013274	35	SHEAR	46	1.00031	-0.410212	0.0215824	-0.352594	-0.352486
1147	2HP_35AM	0.03	0.255722	2HP	20.55	0.013274	35	POSTSHEAR	47	7.38602e-06	-0.429569	0.018271	-0.381599	-51665.1
1148	2HP_35AM	0.03	0.255722	2HP	20.55	0.013274	35	PRESHEAR	48	2500.32	64.0324	0.108751	64.2258	0.0256871
1149	2HP_35AM	0.03	0.255722	2HP	20.55	0.013274	35	POSTSHEAR	5	1.45716e-05	-0.0983508	0.0185891	-0.00245783	-168.673
1150	2HP_35AM	0.03	0.255722	2HP	20.55	0.013274	35	PRESHEAR	6	2500.29	66.6296	0.100775	66.7711	0.0267053
1151	2HP_35AM	0.03	0.255722	2HP	20.55	0.013274	35	SHEAR	7	2000.24	54.5367	0.0638296	54.6619	0.0273277
1152	2HP_35AM	0.03	0.255722	2HP	20.55	0.013274	35	POSTSHEAR	8	-3.8754e-06	-0.0959913	0.0198716	-0.0355429	9171.42
1153	2HP_35AM	0.03	0.255722	2HP	20.55	0.013274	35	PRESHEAR	9	2500.3	66.4087	0.110997	66.5887	0.0266323
1154	2LP_0AM	0.03	0.255722	2LP	20.88	0.008415	0	PRESHEAR	0	2500.55	77.8849	0.22083	78.3307	0.0313254
1155	2LP_0AM	0.03	0.255722	2LP	20.88	0.008415	0	SHEAR	1	2500.57	77.7845	0.224346	78.2048	0.0312748
1156	2LP_0AM	0.03	0.255722	2LP	20.88	0.008415	0	SHEAR	10	1850.4	63.8146	0.0971537	63.9778	0.0345751
1157	2LP_0AM	0.03	0.255722	2LP	20.88	0.008415	0	POSTSHEAR	11	2.09763e-05	1.40866	0.011341	1.44931	69092.8
1158	2LP_0AM	0.03	0.255722	2LP	20.88	0.008415	0	PRESHEAR	12	2500.54	78.1496	0.185238	78.7146	0.0314791
1159	2LP_0AM	0.03	0.255722	2LP	20.88	0.008415	0	SHEAR	13	1750.39	61.6288	0.0792428	61.7697	0.0352892
1160	2LP_0AM	0.03	0.255722	2LP	20.88	0.008415	0	POSTSHEAR	14	2.35386e-05	1.56667	0.0111619	1.58546	67355.6
1161	2LP_0AM	0.03	0.255722	2LP	20.88	0.008415	0	PRESHEAR	15	2500.55	78.2663	0.202256	78.7953	0.0315112
1162	2LP_0AM	0.03	0.255722	2LP	20.88	0.008415	0	SHEAR	16	1600.35	58.3049	0.045029	58.3774	0.036478
1163	2LP_0AM	0.03	0.255722	2LP	20.88	0.008415	0	POSTSHEAR	17	-2.27718e-05	1.63032	0.00979475	1.66961	-73319.1
1164	2LP_0AM	0.03	0.255722	2LP	20.88	0.008415	0	PRESHEAR	18	2500.55	78.3846	0.218764	78.8949	0.031551
1165	2LP_0AM	0.03	0.255722	2LP	20.88	0.008415	0	SHEAR	19	1500.34	56.0737	0.0266661	56.1373	0.0374164
1166	2LP_0AM	0.03	0.255722	2LP	20.88	0.008415	0	POSTSHEAR	2	-1.00898e-05	0.915082	0.0153303	1.00076	-99185.6
1167	2LP_0AM	0.03	0.255722	2LP	20.88	0.008415	0	POSTSHEAR	20	5.65811e-06	1.84136	0.0131076	1.87398	331202
1168	2LP_0AM	0.03	0.255722	2LP	20.88	0.008415	0	PRESHEAR	21	2500.56	78.5153	0.205265	79.0844	0.0316267
1169	2LP_0AM	0.03	0.255722	2LP	20.88	0.008415	0	SHEAR	22	1400.31	53.8225	0.014314	53.8494	0.0384553
1170	2LP_0AM	0.03	0.255722	2LP	20.88	0.008415	0	POSTSHEAR	23	-9.15602e-06	1.95947	0.00711578	1.98142	-216406
1171	2LP_0AM	0.03	0.255722	2LP	20.88	0.008415	0	PRESHEAR	24	2500.56	78.6682	0.215831	79.1991	0.0316725
1172	2LP_0AM	0.03	0.255722	2LP	20.88	0.008415	0	SHEAR	25	1250.27	50.3286	0.0257237	50.3883	0.0403018
1173	2LP_0AM	0.03	0.255722	2LP	20.88	0.008415	0	POSTSHEAR	26	6.56989e-06	2.0793	0.00951685	2.12209	323002
1174	2LP_0AM	0.03	0.255722	2LP	20.88	0.008415	0	PRESHEAR	27	2500.56	78.7541	0.228617	79.2964	0.0317115
1175	2LP_0AM	0.03	0.255722	2LP	20.88	0.008415	0	SHEAR	28	1000.22	44.2435	0.0773185	44.3643	0.0443545
1176	2LP_0AM	0.03	0.255722	2LP	20.88	0.008415	0	POSTSHEAR	29	2.55487e-05	2.24732	0.00922362	2.26455	88636.4
1177	2LP_0AM	0.03	0.255722	2LP	20.88	0.008415	0	PRESHEAR	3	2500.56	77.8898	0.205077	78.3363	0.0313275
1178	2LP_0AM	0.03	0.255722	2LP	20.88	0.008415	0	PRESHEAR	30	2500.54	78.9114	0.238216	79.4921	0.0317899
1179	2LP_0AM	0.03	0.255722	2LP	20.88	0.008415	0	SHEAR	31	750.17	37.7904	0.0924147	37.9121	0.050538
1180	2LP_0AM	0.03	0.255722	2LP	20.88	0.008415	0	POSTSHEAR	32	-1.00357e-05	2.41885	0.00687249	2.46295	-245420
1181	2LP_0AM	0.03	0.255722	2LP	20.88	0.008415	0	PRESHEAR	33	2500.56	79.0468	0.214378	79.635	0.0318469
1182	2LP_0AM	0.03	0.255722	2LP	20.88	0.008415	0	SHEAR	34	600.13	33.7681	0.0897735	33.9097	0.056504
1183	2LP_0AM	0.03	0.255722	2LP	20.88	0.008415	0	POSTSHEAR	35	-1.1899e-05	2.60879	0.00923982	2.6256	-220658
1184	2LP_0AM	0.03	0.255722	2LP	20.88	0.008415	0	PRESHEAR	36	2500.57	79.1874	0.22281	79.7857	0.031907
1185	2LP_0AM	0.03	0.255722	2LP	20.88	0.008415	0	SHEAR	37	500.111	30.8716	0.0955618	31.038	0.0620623
1186	2LP_0AM	0.03	0.255722	2LP	20.88	0.008415	0	POSTSHEAR	38	2.13112e-05	2.77274	0.0138128	2.79669	131231
1187	2LP_0AM	0.03	0.255722	2LP	20.88	0.008415	0	PRESHEAR	39	2500.55	79.3815	0.204589	79.8986	0.0319524
1188	2LP_0AM	0.03	0.255722	2LP	20.88	0.008415	0	SHEAR	4	2250.52	72.4621	0.176738	72.7295	0.0323168
1189	2LP_0AM	0.03	0.255722	2LP	20.88	0.008415	0	SHEAR	40	400.088	27.8946	0.0891373	28.0581	0.0701298
1190	2LP_0AM	0.03	0.255722	2LP	20.88	0.008415	0	POSTSHEAR	41	-1.94307e-05	2.94731	0.0111987	2.97639	-153180
1191	2LP_0AM	0.03	0.255722	2LP	20.88	0.008415	0	PRESHEAR	42	2500.55	79.447	0.190877	79.9787	0.0319844
1192	2LP_0AM	0.03	0.255722	2LP	20.88	0.008415	0	SHEAR	43	250.057	22.8821	0.0892272	23.0049	0.0919986
1193	2LP_0AM	0.03	0.255722	2LP	20.88	0.008415	0	POSTSHEAR	44	-1.5474e-05	3.37237	0.00817996	3.39068	-219121
1194	2LP_0AM	0.03	0.255722	2LP	20.88	0.008415	0	PRESHEAR	45	2500.54	79.6065	0.223199	80.1228	0.0320422
1195	2LP_0AM	0.03	0.255722	2LP	20.88	0.008415	0	SHEAR	46	200.044	21.1123	0.0620469	21.2777	0.106365
1196	2LP_0AM	0.03	0.255722	2LP	20.88	0.008415	0	POSTSHEAR	47	-3.99568e-06	3.54828	0.00994843	3.58085	-896180
1197	2LP_0AM	0.03	0.255722	2LP	20.88	0.008415	0	PRESHEAR	48	2500.55	79.684	0.195956	80.1881	0.0320682
1198	2LP_0AM	0.03	0.255722	2LP	20.88	0.008415	0	SHEAR	49	100.022	16.8572	0.0425239	17.0179	0.170141
1199	2LP_0AM	0.03	0.255722	2LP	20.88	0.008415	0	POSTSHEAR	5	-1.01704e-05	1.10829	0.0107837	1.16858	-114899
1200	2LP_0AM	0.03	0.255722	2LP	20.88	0.008415	0	POSTSHEAR	50	-1.55823e-05	3.89428	0.0154384	3.94736	-253324
1201	2LP_0AM	0.03	0.255722	2LP	20.88	0.008415	0	PRESHEAR	51	2500.55	79.7097	0.219561	80.3163	0.0321195
1202	2LP_0AM	0.03	0.255722	2LP	20.88	0.008415	0	SHEAR	52	75.0173	15.5954	0.0395783	15.905	0.212018
1203	2LP_0AM	0.03	0.255722	2LP	20.88	0.008415	0	POSTSHEAR	53	9.22661e-06	4.16713	0.00888051	4.19116	454247
1204	2LP_0AM	0.03	0.255722	2LP	20.88	0.008415	0	PRESHEAR	54	2500.58	79.8332	0.220618	80.3992	0.0321522
1205	2LP_0AM	0.03	0.255722	2LP	20.88	0.008415	0	SHEAR	55	50.0106	14.2993	0.0328277	14.5596	0.291129
1206	2LP_0AM	0.03	0.255722	2LP	20.88	0.008415	0	POSTSHEAR	56	3.73088e-06	4.33501	0.00871234	4.45923	1.19522e+06
1207	2LP_0AM	0.03	0.255722	2LP	20.88	0.008415	0	PRESHEAR	57	2500.57	79.8748	0.212167	80.4618	0.0321774
1208	2LP_0AM	0.03	0.255722	2LP	20.88	0.008415	0	SHEAR	58	25.0051	12.5082	0.0247055	12.889	0.515457
1209	2LP_0AM	0.03	0.255722	2LP	20.88	0.008415	0	POSTSHEAR	59	3.7429e-06	4.73695	0.0113912	4.83746	1.29244e+06
1210	2LP_0AM	0.03	0.255722	2LP	20.88	0.008415	0	PRESHEAR	6	2500.55	77.9905	0.195473	78.4593	0.0313769
1211	2LP_0AM	0.03	0.255722	2LP	20.88	0.008415	0	PRESHEAR	60	2500.53	80.0655	0.229749	80.5863	0.0322277
1212	2LP_0AM	0.03	0.255722	2LP	20.88	0.008415	0	SHEAR	61	10.003	11.03	0.0327494	11.4523	1.14489
1213	2LP_0AM	0.03	0.255722	2LP	20.88	0.008415	0	POSTSHEAR	62	2.56888e-05	5.04483	0.0104995	5.24572	204203
1214	2LP_0AM	0.03	0.255722	2LP	20.88	0.008415	0	PRESHEAR	63	2500.54	80.1479	0.223503	80.6358	0.0322473
1215	2LP_0AM	0.03	0.255722	2LP	20.88	0.008415	0	SHEAR	7	2000.44	67.0464	0.130379	67.2688	0.0336269
1216	2LP_0AM	0.03	0.255722	2LP	20.88	0.008415	0	POSTSHEAR	8	9.69354e-06	1.2882	0.0174304	1.31193	135341
1217	2LP_0AM	0.03	0.255722	2LP	20.88	0.008415	0	PRESHEAR	9	2500.56	78.1274	0.195474	78.547	0.0314118
1218	2LP_10AM	0.03	0.255722	2LP	20.55	0.008283	10	PRESHEAR	0	2500.31	48.5697	0.0948716	48.7973	0.0195165
1219	2LP_10AM	0.03	0.255722	2LP	20.55	0.008283	10	SHEAR	1	2500.31	48.6062	0.088542	48.7379	0.0194928
1220	2LP_10AM	0.03	0.255722	2LP	20.55	0.008283	10	SHEAR	10	1750.2	35.8866	0.034311	35.946	0.0205382
1221	2LP_10AM	0.03	0.255722	2LP	20.55	0.008283	10	POSTSHEAR	11	8.36779e-06	0.0806462	0.0112291	0.12972	15502.3
1222	2LP_10AM	0.03	0.255722	2LP	20.55	0.008283	10	PRESHEAR	12	2500.3	48.408	0.0932275	48.6902	0.0194737
1223	2LP_10AM	0.03	0.255722	2LP	20.55	0.008283	10	SHEAR	13	1500.19	31.5354	0.0208308	31.5769	0.0210486
1224	2LP_10AM	0.03	0.255722	2LP	20.55	0.008283	10	POSTSHEAR	14	-4.6404e-05	0.0901535	0.00888426	0.157177	-3387.15
1225	2LP_10AM	0.03	0.255722	2LP	20.55	0.008283	10	PRESHEAR	15	2500.3	48.37	0.0882935	48.6492	0.0194574
1226	2LP_10AM	0.03	0.255722	2LP	20.55	0.008283	10	SHEAR	16	1250.14	27.0995	0.0254276	27.1541	0.0217208
1227	2LP_10AM	0.03	0.255722	2LP	20.55	0.008283	10	POSTSHEAR	17	1.01981e-05	0.106955	0.0182795	0.162166	15901.6
1228	2LP_10AM	0.03	0.255722	2LP	20.55	0.008283	10	PRESHEAR	18	2500.31	48.3335	0.0870445	48.6076	0.0194406
1229	2LP_10AM	0.03	0.255722	2LP	20.55	0.008283	10	SHEAR	19	1000.14	22.5691	0.0267901	22.6456	0.0226424
1230	2LP_10AM	0.03	0.255722	2LP	20.55	0.008283	10	POSTSHEAR	2	4.06222e-05	0.0102252	0.0155343	0.0725816	1786.75
1231	2LP_10AM	0.03	0.255722	2LP	20.55	0.008283	10	POSTSHEAR	20	-2.06268e-05	0.0916941	0.0113675	0.179421	-8698.45
1232	2LP_10AM	0.03	0.255722	2LP	20.55	0.008283	10	PRESHEAR	21	2500.29	48.2473	0.0839271	48.5327	0.0194108
1233	2LP_10AM	0.03	0.255722	2LP	20.55	0.008283	10	SHEAR	22	750.1	17.8933	0.0312817	17.9767	0.0239658
1234	2LP_10AM	0.03	0.255722	2LP	20.55	0.008283	10	POSTSHEAR	23	5.20386e-05	0.126374	0.0220025	0.179989	3458.76
1235	2LP_10AM	0.03	0.255722	2LP	20.55	0.008283	10	PRESHEAR	24	2500.3	48.2271	0.0881596	48.4761	0.0193881
1236	2LP_10AM	0.03	0.255722	2LP	20.55	0.008283	10	SHEAR	25	500.057	13.1032	0.0329013	13.1792	0.0263553
1237	2LP_10AM	0.03	0.255722	2LP	20.55	0.008283	10	POSTSHEAR	26	2.86197e-05	0.13711	0.0109639	0.205067	7165.23
1238	2LP_10AM	0.03	0.255722	2LP	20.55	0.008283	10	PRESHEAR	27	2500.31	48.232	0.0928648	48.4411	0.019374
1239	2LP_10AM	0.03	0.255722	2LP	20.55	0.008283	10	SHEAR	28	250.03	7.98054	0.0245991	8.06415	0.0322527
1240	2LP_10AM	0.03	0.255722	2LP	20.55	0.008283	10	POSTSHEAR	29	-4.26934e-06	0.164866	0.0154899	0.210121	-49216.2
1241	2LP_10AM	0.03	0.255722	2LP	20.55	0.008283	10	PRESHEAR	3	2500.3	48.5428	0.0961606	48.7458	0.019496
1242	2LP_10AM	0.03	0.255722	2LP	20.55	0.008283	10	PRESHEAR	30	2500.3	48.1864	0.0865588	48.4012	0.0193582
1243	2LP_10AM	0.03	0.255722	2LP	20.55	0.008283	10	SHEAR	31	100.014	4.50114	0.024829	4.60167	0.0460103
1244	2LP_10AM	0.03	0.255722	2LP	20.55	0.008283	10	POSTSHEAR	32	2.28418e-05	0.181776	0.0209548	0.245881	10764.5
1245	2LP_10AM	0.03	0.255722	2LP	20.55	0.008283	10	PRESHEAR	33	2500.31	48.1251	0.0904586	48.3674	0.0193445
1246	2LP_10AM	0.03	0.255722	2LP	20.55	0.008283	10	SHEAR	34	75.0102	3.85774	0.0158062	3.93272	0.0524291
1247	2LP_10AM	0.03	0.255722	2LP	20.55	0.008283	10	POSTSHEAR	35	6.1319e-06	0.163634	0.0147502	0.253234	41297.8
1248	2LP_10AM	0.03	0.255722	2LP	20.55	0.008283	10	PRESHEAR	36	2500.3	48.0686	0.0881337	48.318	0.0193248
1249	2LP_10AM	0.03	0.255722	2LP	20.55	0.008283	10	SHEAR	37	50.0072	3.16594	0.0190887	3.21869	0.0643647
1250	2LP_10AM	0.03	0.255722	2LP	20.55	0.008283	10	POSTSHEAR	38	-9.45978e-06	0.191157	0.0195279	0.270068	-28549.1
1251	2LP_10AM	0.03	0.255722	2LP	20.55	0.008283	10	PRESHEAR	39	2500.3	48.0729	0.0846379	48.2593	0.0193014
1252	2LP_10AM	0.03	0.255722	2LP	20.55	0.008283	10	SHEAR	4	2250.25	44.4007	0.0699934	44.5059	0.0197782
1253	2LP_10AM	0.03	0.255722	2LP	20.55	0.008283	10	SHEAR	40	25.0058	2.34617	0.0120633	2.43001	0.097178
1254	2LP_10AM	0.03	0.255722	2LP	20.55	0.008283	10	POSTSHEAR	41	-2.39587e-05	0.216397	0.0194963	0.294859	-12307
1255	2LP_10AM	0.03	0.255722	2LP	20.55	0.008283	10	PRESHEAR	42	2500.31	48.0205	0.0884651	48.2368	0.0192923
1256	2LP_10AM	0.03	0.255722	2LP	20.55	0.008283	10	SHEAR	43	10.001	1.74496	0.0125802	1.80358	0.180339
1257	2LP_10AM	0.03	0.255722	2LP	20.55	0.008283	10	POSTSHEAR	44	-7.54467e-06	0.265532	0.0144573	0.328997	-43606.5
1258	2LP_10AM	0.03	0.255722	2LP	20.55	0.008283	10	PRESHEAR	45	2500.3	48.0042	0.0875824	48.2234	0.019287
1259	2LP_10AM	0.03	0.255722	2LP	20.55	0.008283	10	SHEAR	46	1.00012	0.896809	0.0161015	0.944085	0.943972
1260	2LP_10AM	0.03	0.255722	2LP	20.55	0.008283	10	POSTSHEAR	47	-1.79907e-05	0.304832	0.0232607	0.391862	-21781.3
1261	2LP_10AM	0.03	0.255722	2LP	20.55	0.008283	10	PRESHEAR	48	2500.29	47.9551	0.085935	48.1656	0.019264
1262	2LP_10AM	0.03	0.255722	2LP	20.55	0.008283	10	POSTSHEAR	5	9.863e-06	0.0406568	0.0116419	0.0876771	8889.5
1263	2LP_10AM	0.03	0.255722	2LP	20.55	0.008283	10	PRESHEAR	6	2500.32	48.4711	0.0851343	48.745	0.0194955
1264	2LP_10AM	0.03	0.255722	2LP	20.55	0.008283	10	SHEAR	7	2000.25	40.1263	0.0522461	40.2423	0.0201186
1265	2LP_10AM	0.03	0.255722	2LP	20.55	0.008283	10	POSTSHEAR	8	3.96144e-05	0.04186	0.0139985	0.106455	2687.27
1266	2LP_10AM	0.03	0.255722	2LP	20.55	0.008283	10	PRESHEAR	9	2500.29	48.4275	0.0817216	48.6852	0.0194718
1267	2LP_20AM	0.03	0.255722	2LP	20.58	0.008295	20	PRESHEAR	0	2500.29	34.4685	0.14938	34.6858	0.0138727
1268	2LP_20AM	0.03	0.255722	2LP	20.58	0.008295	20	SHEAR	1	2500.3	34.4445	0.139833	34.6893	0.013874
1269	2LP_20AM	0.03	0.255722	2LP	20.58	0.008295	20	SHEAR	10	1750.2	25.5645	0.0492386	25.6587	0.0146604
1270	2LP_20AM	0.03	0.255722	2LP	20.58	0.008295	20	POSTSHEAR	11	-1.33325e-05	-0.0873033	0.0149077	-0.0428877	3216.79
1271	2LP_20AM	0.03	0.255722	2LP	20.58	0.008295	20	PRESHEAR	12	2500.31	34.2295	0.149811	34.5311	0.0138107
1272	2LP_20AM	0.03	0.255722	2LP	20.58	0.008295	20	SHEAR	13	1500.18	22.4852	0.0239159	22.5268	0.015016
1273	2LP_20AM	0.03	0.255722	2LP	20.58	0.008295	20	POSTSHEAR	14	-2.58982e-05	-0.0960351	0.0116719	-0.0723541	2793.79
1274	2LP_20AM	0.03	0.255722	2LP	20.58	0.008295	20	PRESHEAR	15	2500.3	34.164	0.152405	34.5154	0.0138045
1275	2LP_20AM	0.03	0.255722	2LP	20.58	0.008295	20	SHEAR	16	1250.14	19.3468	0.0192573	19.43	0.0155423
1276	2LP_20AM	0.03	0.255722	2LP	20.58	0.008295	20	POSTSHEAR	17	1.04324e-05	-0.135867	0.0182998	-0.0765063	-7333.51
1277	2LP_20AM	0.03	0.255722	2LP	20.58	0.008295	20	PRESHEAR	18	2500.29	34.1382	0.149313	34.4643	0.0137841
1278	2LP_20AM	0.03	0.255722	2LP	20.58	0.008295	20	SHEAR	19	1000.11	16.1664	0.0391076	16.2315	0.0162297
1279	2LP_20AM	0.03	0.255722	2LP	20.58	0.008295	20	POSTSHEAR	2	4.60301e-05	-0.0420754	0.0117073	0.0237905	516.846
1280	2LP_20AM	0.03	0.255722	2LP	20.58	0.008295	20	POSTSHEAR	20	-7.4131e-08	-0.147348	0.00845396	-0.105501	1.42318e+06
1281	2LP_20AM	0.03	0.255722	2LP	20.58	0.008295	20	PRESHEAR	21	2500.29	34.0188	0.156582	34.3919	0.0137552
1282	2LP_20AM	0.03	0.255722	2LP	20.58	0.008295	20	SHEAR	22	750.092	12.8464	0.0393622	12.9429	0.0172551
1283	2LP_20AM	0.03	0.255722	2LP	20.58	0.008295	20	POSTSHEAR	23	-1.72989e-05	-0.149762	0.00970477	-0.11827	6836.86
1284	2LP_20AM	0.03	0.255722	2LP	20.58	0.008295	20	PRESHEAR	24	2500.31	33.9551	0.154203	34.3138	0.0137238
1285	2LP_20AM	0.03	0.255722	2LP	20.58	0.008295	20	SHEAR	25	500.059	9.43327	0.0366597	9.50121	0.0190002
1286	2LP_20AM	0.03	0.255722	2LP	20.58	0.008295	20	POSTSHEAR	26	-4.20437e-06	-0.18447	0.0155503	-0.149851	35641.7
1287	2LP_20AM	0.03	0.255722	2LP	20.58	0.008295	20	PRESHEAR	27	2500.3	33.8751	0.140075	34.2236	0.0136878
1288	2LP_20AM	0.03	0.255722	2LP	20.58	0.008295	20	SHEAR	28	250.031	5.7032	0.0260002	5.76716	0.0230658
1289	2LP_20AM	0.03	0.255722	2LP	20.58	0.008295	20	POSTSHEAR	29	2.7312e-05	-0.242963	0.0116351	-0.172719	-6323.92
1290	2LP_20AM	0.03	0.255722	2LP	20.58	0.008295	20	PRESHEAR	3	2500.31	34.4028	0.153116	34.6348	0.0138522
1291	2LP_20AM	0.03	0.255722	2LP	20.58	0.008295	20	PRESHEAR	30	2500.3	33.8488	0.144435	34.063	0.0136236
1292	2LP_20AM	0.03	0.255722	2LP	20.58	0.008295	20	SHEAR	31	100.007	3.14816	0.02029	3.26052	0.0326029
1293	2LP_20AM	0.03	0.255722	2LP	20.58	0.008295	20	POSTSHEAR	32	1.66837e-05	-0.241087	0.0160775	-0.1939	-11622.1
1294	2LP_20AM	0.03	0.255722	2LP	20.58	0.008295	20	PRESHEAR	33	2500.31	33.835	0.147988	34.0408	0.0136146
1295	2LP_20AM	0.03	0.255722	2LP	20.58	0.008295	20	SHEAR	34	75.0068	2.63453	0.0184933	2.76351	0.0368434
1296	2LP_20AM	0.03	0.255722	2LP	20.58	0.008295	20	POSTSHEAR	35	-3.15191e-05	-0.230652	0.0191698	-0.189199	6002.68
1297	2LP_20AM	0.03	0.255722	2LP	20.58	0.008295	20	PRESHEAR	36	2500.29	33.7803	0.147518	34.006	0.0136008
1298	2LP_20AM	0.03	0.255722	2LP	20.58	0.008295	20	SHEAR	37	50.0053	2.11974	0.0133848	2.19008	0.043797
1299	2LP_20AM	0.03	0.255722	2LP	20.58	0.008295	20	POSTSHEAR	38	2.55202e-05	-0.272376	0.0118201	-0.201255	-7886.09
1300	2LP_20AM	0.03	0.255722	2LP	20.58	0.008295	20	PRESHEAR	39	2500.3	33.6896	0.139262	33.9544	0.0135801
1301	2LP_20AM	0.03	0.255722	2LP	20.58	0.008295	20	SHEAR	4	2250.27	31.5675	0.116254	31.7181	0.0140952
1302	2LP_20AM	0.03	0.255722	2LP	20.58	0.008295	20	SHEAR	40	24.9993	1.43245	0.0178123	1.54305	0.0617238
1303	2LP_20AM	0.03	0.255722	2LP	20.58	0.008295	20	POSTSHEAR	41	-1.97605e-05	-0.26873	0.0101994	-0.209364	10595.1
1304	2LP_20AM	0.03	0.255722	2LP	20.58	0.008295	20	PRESHEAR	42	2500.29	33.6729	0.155939	33.8966	0.0135571
1305	2LP_20AM	0.03	0.255722	2LP	20.58	0.008295	20	SHEAR	43	10.0048	0.878379	0.00989549	0.951026	0.0950574
1306	2LP_20AM	0.03	0.255722	2LP	20.58	0.008295	20	POSTSHEAR	44	1.66776e-05	-0.300826	0.0180629	-0.225399	-13515.1
1307	2LP_20AM	0.03	0.255722	2LP	20.58	0.008295	20	PRESHEAR	45	2500.3	33.5997	0.153675	33.8276	0.0135294
1308	2LP_20AM	0.03	0.255722	2LP	20.58	0.008295	20	SHEAR	46	1.00056	0.175873	0.0170472	0.256683	0.256539
1309	2LP_20AM	0.03	0.255722	2LP	20.58	0.008295	20	POSTSHEAR	47	1.86654e-05	-0.307032	0.0145053	-0.233779	-12524.8
1310	2LP_20AM	0.03	0.255722	2LP	20.58	0.008295	20	PRESHEAR	48	2500.3	33.471	0.146029	33.7183	0.0134857
1311	2LP_20AM	0.03	0.255722	2LP	20.58	0.008295	20	POSTSHEAR	5	-4.8983e-05	-0.0545487	0.0111315	-0.00978913	199.847
1312	2LP_20AM	0.03	0.255722	2LP	20.58	0.008295	20	PRESHEAR	6	2500.28	34.344	0.165724	34.6053	0.0138406
1313	2LP_20AM	0.03	0.255722	2LP	20.58	0.008295	20	SHEAR	7	2000.25	28.535	0.0884137	28.702	0.0143492
1314	2LP_20AM	0.03	0.255722	2LP	20.58	0.008295	20	POSTSHEAR	8	1.92558e-05	-0.0833302	0.0123417	-0.0328869	-1707.89
1315	2LP_20AM	0.03	0.255722	2LP	20.58	0.008295	20	PRESHEAR	9	2500.29	34.3125	0.144023	34.5861	0.0138328
1316	2LP_35AM	0.03	0.255722	2LP	20.58	0.008295	35	PRESHEAR	0	2500.31	44.9022	0.071379	45.0291	0.0180094
1317	2LP_35AM	0.03	0.255722	2LP	20.58	0.008295	35	SHEAR	1	2500.3	45.1349	0.0693804	45.2697	0.0181057
1318	2LP_35AM	0.03	0.255722	2LP	20.58	0.008295	35	SHEAR	10	1750.21	32.6282	0.0302608	32.6932	0.0186796
1319	2LP_35AM	0.03	0.255722	2LP	20.58	0.008295	35	POSTSHEAR	11	-7.56365e-07	0.0335687	0.0132887	0.0753945	-99680
1320	2LP_35AM	0.03	0.255722	2LP	20.58	0.008295	35	PRESHEAR	12	2500.29	45.0525	0.0696388	45.152	0.0180587
1321	2LP_35AM	0.03	0.255722	2LP	20.58	0.008295	35	SHEAR	13	1500.19	28.3153	0.0180116	28.3497	0.0188975
1322	2LP_35AM	0.03	0.255722	2LP	20.58	0.008295	35	POSTSHEAR	14	-3.49472e-05	0.061497	0.0208244	0.118383	-3387.5
1323	2LP_35AM	0.03	0.255722	2LP	20.58	0.008295	35	PRESHEAR	15	2500.31	45.0406	0.0727385	45.1651	0.0180638
1324	2LP_35AM	0.03	0.255722	2LP	20.58	0.008295	35	SHEAR	16	1250.15	23.9663	0.0206103	24.01	0.0192056
1325	2LP_35AM	0.03	0.255722	2LP	20.58	0.008295	35	POSTSHEAR	17	-3.55613e-07	0.0397325	0.0147072	0.100027	-281281
1326	2LP_35AM	0.03	0.255722	2LP	20.58	0.008295	35	PRESHEAR	18	2500.29	44.9627	0.0739724	45.0934	0.0180353
1327	2LP_35AM	0.03	0.255722	2LP	20.58	0.008295	35	SHEAR	19	1000.1	19.5641	0.0309964	19.6402	0.0196382
1328	2LP_35AM	0.03	0.255722	2LP	20.58	0.008295	35	POSTSHEAR	2	-3.41992e-05	-0.015753	0.0250141	0.0397892	-1163.45
1329	2LP_35AM	0.03	0.255722	2LP	20.58	0.008295	35	POSTSHEAR	20	-5.4311e-07	0.0643619	0.0133697	0.113771	-209480
1330	2LP_35AM	0.03	0.255722	2LP	20.58	0.008295	35	PRESHEAR	21	2500.3	44.9236	0.0774617	45.0378	0.018013
1331	2LP_35AM	0.03	0.255722	2LP	20.58	0.008295	35	SHEAR	22	750.092	15.118	0.0209873	15.1762	0.0202324
1332	2LP_35AM	0.03	0.255722	2LP	20.58	0.008295	35	POSTSHEAR	23	-3.12236e-05	0.0509991	0.0132667	0.112912	-3616.23
1333	2LP_35AM	0.03	0.255722	2LP	20.58	0.008295	35	PRESHEAR	24	2500.31	44.8993	0.0747947	45.0096	0.0180016
1334	2LP_35AM	0.03	0.255722	2LP	20.58	0.008295	35	SHEAR	25	500.059	10.592	0.0234378	10.649	0.0212956
1335	2LP_35AM	0.03	0.255722	2LP	20.58	0.008295	35	POSTSHEAR	26	-2.79832e-06	0.0763514	0.0205469	0.126373	-45160.2
1336	2LP_35AM	0.03	0.255722	2LP	20.58	0.008295	35	PRESHEAR	27	2500.29	44.8676	0.0758361	44.9703	0.017986
1337	2LP_35AM	0.03	0.255722	2LP	20.58	0.008295	35	SHEAR	28	250.034	5.9611	0.0176717	5.99884	0.023992
1338	2LP_35AM	0.03	0.255722	2LP	20.58	0.008295	35	POSTSHEAR	29	2.96243e-05	0.0880299	0.0214208	0.129342	4366.07
1339	2LP_35AM	0.03	0.255722	2LP	20.58	0.008295	35	PRESHEAR	3	2500.29	45.0319	0.0785275	45.1729	0.0180671
1340	2LP_35AM	0.03	0.255722	2LP	20.58	0.008295	35	PRESHEAR	30	2500.3	44.8513	0.0747916	44.9677	0.017985
1341	2LP_35AM	0.03	0.255722	2LP	20.58	0.008295	35	SHEAR	31	100.016	2.6967	0.00816175	2.80478	0.0280434
1342	2LP_35AM	0.03	0.255722	2LP	20.58	0.008295	35	POSTSHEAR	32	4.26417e-05	0.0905758	0.0143211	0.128886	3022.53
1343	2LP_35AM	0.03	0.255722	2LP	20.58	0.008295	35	PRESHEAR	33	2500.31	44.8565	0.0722641	44.9616	0.0179824
1344	2LP_35AM	0.03	0.255722	2LP	20.58	0.008295	35	SHEAR	34	75.0112	2.15155	0.0170676	2.25901	0.0301156
1345	2LP_35AM	0.03	0.255722	2LP	20.58	0.008295	35	POSTSHEAR	35	-6.6293e-05	0.0844662	0.0149188	0.126921	-1914.54
1346	2LP_35AM	0.03	0.255722	2LP	20.58	0.008295	35	PRESHEAR	36	2500.31	44.8547	0.0751731	44.9832	0.0179911
1347	2LP_35AM	0.03	0.255722	2LP	20.58	0.008295	35	SHEAR	37	50.0122	1.62531	0.0190688	1.70939	0.0341794
1348	2LP_35AM	0.03	0.255722	2LP	20.58	0.008295	35	POSTSHEAR	38	-4.61448e-05	0.0962847	0.00968841	0.146404	-3172.7
1349	2LP_35AM	0.03	0.255722	2LP	20.58	0.008295	35	PRESHEAR	39	2500.31	44.8578	0.0625538	44.9592	0.0179815
1350	2LP_35AM	0.03	0.255722	2LP	20.58	0.008295	35	SHEAR	4	2250.26	41.0229	0.0583973	41.1362	0.0182807
1351	2LP_35AM	0.03	0.255722	2LP	20.58	0.008295	35	SHEAR	40	25.0024	1.0397	0.0309814	1.09364	0.0437415
1352	2LP_35AM	0.03	0.255722	2LP	20.58	0.008295	35	POSTSHEAR	41	1.47317e-05	0.111933	0.0156369	0.15257	10356.5
1353	2LP_35AM	0.03	0.255722	2LP	20.58	0.008295	35	PRESHEAR	42	2500.29	44.8379	0.0732578	44.9568	0.0179806
1354	2LP_35AM	0.03	0.255722	2LP	20.58	0.008295	35	SHEAR	43	10.0005	0.603575	0.0135689	0.650103	0.0650068
1355	2LP_35AM	0.03	0.255722	2LP	20.58	0.008295	35	POSTSHEAR	44	2.78614e-05	0.142417	0.0121155	0.192784	6919.4
1356	2LP_35AM	0.03	0.255722	2LP	20.58	0.008295	35	PRESHEAR	45	2500.29	44.7043	0.0679688	44.8296	0.0179297
1357	2LP_35AM	0.03	0.255722	2LP	20.58	0.008295	35	SHEAR	46	1.00002	0.157575	0.0136512	0.18469	0.184687
1358	2LP_35AM	0.03	0.255722	2LP	20.58	0.008295	35	POSTSHEAR	47	2.11564e-05	0.142665	0.0119241	0.169517	8012.53
1359	2LP_35AM	0.03	0.255722	2LP	20.58	0.008295	35	PRESHEAR	48	2500.3	44.5612	0.0765001	44.6742	0.0178675
1360	2LP_35AM	0.03	0.255722	2LP	20.58	0.008295	35	POSTSHEAR	5	-1.67141e-05	0.00627994	0.0143222	0.0707299	-4231.74
1361	2LP_35AM	0.03	0.255722	2LP	20.58	0.008295	35	PRESHEAR	6	2500.32	45.0784	0.0713717	45.2139	0.0180832
1362	2LP_35AM	0.03	0.255722	2LP	20.58	0.008295	35	SHEAR	7	2000.23	36.821	0.0430174	36.9264	0.0184611
1363	2LP_35AM	0.03	0.255722	2LP	20.58	0.008295	35	POSTSHEAR	8	4.67812e-05	-0.0172048	0.013514	0.0642789	1374.03
1364	2LP_35AM	0.03	0.255722	2LP	20.58	0.008295	35	PRESHEAR	9	2500.27	45.0753	0.0758995	45.2017	0.0180787
1365	3HP_0AM	0.03	0.255722	3HP	31.61	0.026754	0	PRESHEAR	0	2500.22	163.781	0.364653	166.317	0.066521
1366	3HP_0AM	0.03	0.255722	3HP	31.61	0.026754	0	SHEAR	1	2500.22	162.438	0.389431	164.034	0.0656079
1367	3HP_0AM	0.03	0.255722	3HP	31.61	0.026754	0	SHEAR	10	1850.17	127.887	0.143133	128.145	0.0692613
1368	3HP_0AM	0.03	0.255722	3HP	31.61	0.026754	0	POSTSHEAR	11	3.39559e-05	-0.225159	0.015459	-0.0584557	-1721.51
1369	3HP_0AM	0.03	0.255722	3HP	31.61	0.026754	0	PRESHEAR	12	2500.23	160.627	0.338835	162.771	0.0651025
1370	3HP_0AM	0.03	0.255722	3HP	31.61	0.026754	0	SHEAR	13	1750.16	122.386	0.10788	122.547	0.0700205
1371	3HP_0AM	0.03	0.255722	3HP	31.61	0.026754	0	POSTSHEAR	14	-4.9906e-05	-0.369337	0.0179273	-0.15242	3054.13
1372	3HP_0AM	0.03	0.255722	3HP	31.61	0.026754	0	PRESHEAR	15	2500.22	160.249	0.373842	162.489	0.0649898
1373	3HP_0AM	0.03	0.255722	3HP	31.61	0.026754	0	SHEAR	16	1600.14	114.172	0.0570186	114.263	0.0714079
1374	3HP_0AM	0.03	0.255722	3HP	31.61	0.026754	0	POSTSHEAR	17	-1.69605e-06	-0.442154	0.0111017	-0.237843	140234
1375	3HP_0AM	0.03	0.255722	3HP	31.61	0.026754	0	PRESHEAR	18	2500.23	160.078	0.352958	162.262	0.0648988
1376	3HP_0AM	0.03	0.255722	3HP	31.61	0.026754	0	SHEAR	19	1500.14	108.583	0.0294003	108.623	0.0724087
1377	3HP_0AM	0.03	0.255722	3HP	31.61	0.026754	0	POSTSHEAR	2	2.10587e-05	0.00364137	0.016469	0.196709	9341.02
1378	3HP_0AM	0.03	0.255722	3HP	31.61	0.026754	0	POSTSHEAR	20	-1.88534e-05	-0.462071	0.0215458	-0.275169	14595.2
1379	3HP_0AM	0.03	0.255722	3HP	31.61	0.026754	0	PRESHEAR	21	2500.24	159.497	0.334998	161.943	0.0647709
1380	3HP_0AM	0.03	0.255722	3HP	31.61	0.026754	0	SHEAR	22	1400.13	102.892	0.0142576	102.934	0.0735176
1381	3HP_0AM	0.03	0.255722	3HP	31.61	0.026754	0	POSTSHEAR	23	-2.78719e-05	-0.580521	0.0313755	-0.369518	13257.7
1382	3HP_0AM	0.03	0.255722	3HP	31.61	0.026754	0	PRESHEAR	24	2500.23	159.285	0.347545	161.693	0.0646713
1383	3HP_0AM	0.03	0.255722	3HP	31.61	0.026754	0	SHEAR	25	1250.12	94.4927	0.0269672	94.5359	0.0756217
1384	3HP_0AM	0.03	0.255722	3HP	31.61	0.026754	0	POSTSHEAR	26	1.83824e-05	-0.633266	0.0141132	-0.473258	-25745.1
1385	3HP_0AM	0.03	0.255722	3HP	31.61	0.026754	0	PRESHEAR	27	2500.25	159.221	0.322211	161.447	0.0645723
1386	3HP_0AM	0.03	0.255722	3HP	31.61	0.026754	0	SHEAR	28	1000.09	80.2145	0.0736095	80.3383	0.0803309
1387	3HP_0AM	0.03	0.255722	3HP	31.61	0.026754	0	POSTSHEAR	29	3.93311e-05	-0.719734	0.0255578	-0.489659	-12449.6
1388	3HP_0AM	0.03	0.255722	3HP	31.61	0.026754	0	PRESHEAR	3	2500.22	162.098	0.374144	164.223	0.0656834
1389	3HP_0AM	0.03	0.255722	3HP	31.61	0.026754	0	PRESHEAR	30	2500.22	158.929	0.328657	161.247	0.0644931
1390	3HP_0AM	0.03	0.255722	3HP	31.61	0.026754	0	SHEAR	31	750.068	65.379	0.0693075	65.5207	0.087353
1391	3HP_0AM	0.03	0.255722	3HP	31.61	0.026754	0	POSTSHEAR	32	3.12479e-05	-0.776919	0.0238775	-0.600743	-19225.1
1392	3HP_0AM	0.03	0.255722	3HP	31.61	0.026754	0	PRESHEAR	33	2500.23	158.673	0.291375	161.194	0.0644717
1393	3HP_0AM	0.03	0.255722	3HP	31.61	0.026754	0	SHEAR	34	600.057	56.0438	0.0851625	56.1746	0.0936155
1394	3HP_0AM	0.03	0.255722	3HP	31.61	0.026754	0	POSTSHEAR	35	-1.15053e-05	-0.743993	0.0129872	-0.577045	50154.6
1395	3HP_0AM	0.03	0.255722	3HP	31.61	0.026754	0	PRESHEAR	36	2500.23	158.524	0.317393	161.006	0.0643963
1396	3HP_0AM	0.03	0.255722	3HP	31.61	0.026754	0	SHEAR	37	500.047	49.4561	0.0857589	49.6	0.0991906
1397	3HP_0AM	0.03	0.255722	3HP	31.61	0.026754	0	POSTSHEAR	38	-1.74867e-06	-0.748535	0.0155375	-0.627539	358866
1398	3HP_0AM	0.03	0.255722	3HP	31.61	0.026754	0	PRESHEAR	39	2500.22	158.305	0.386262	160.857	0.0643371
1399	3HP_0AM	0.03	0.255722	3HP	31.61	0.026754	0	SHEAR	4	2250.22	149.098	0.305687	149.855	0.0665958
1400	3HP_0AM	0.03	0.255722	3HP	31.61	0.026754	0	SHEAR	40	400.038	42.7415	0.0808082	42.8636	0.107149
1401	3HP_0AM	0.03	0.255722	3HP	31.61	0.026754	0	POSTSHEAR	41	-5.15469e-05	-0.861153	0.0160338	-0.722434	14015.1
1402	3HP_0AM	0.03	0.255722	3HP	31.61	0.026754	0	PRESHEAR	42	2500.23	158.067	0.363185	160.54	0.0642101
1403	3HP_0AM	0.03	0.255722	3HP	31.61	0.026754	0	SHEAR	43	250.022	31.956	0.0657958	32.0788	0.128304
1404	3HP_0AM	0.03	0.255722	3HP	31.61	0.026754	0	POSTSHEAR	44	3.07247e-05	-0.870431	0.0216123	-0.686244	-22335.2
1405	3HP_0AM	0.03	0.255722	3HP	31.61	0.026754	0	PRESHEAR	45	2500.24	157.843	0.360465	160.251	0.0640942
1406	3HP_0AM	0.03	0.255722	3HP	31.61	0.026754	0	SHEAR	46	200.018	27.91	0.067445	28.0192	0.140084
1407	3HP_0AM	0.03	0.255722	3HP	31.61	0.026754	0	POSTSHEAR	47	2.87195e-05	-0.783908	0.00842606	-0.583414	-20314.2
1408	3HP_0AM	0.03	0.255722	3HP	31.61	0.026754	0	PRESHEAR	48	2500.24	157.642	0.359824	159.962	0.0639788
1409	3HP_0AM	0.03	0.255722	3HP	31.61	0.026754	0	SHEAR	49	100.01	19.1047	0.0416979	19.2089	0.192069
1410	3HP_0AM	0.03	0.255722	3HP	31.61	0.026754	0	POSTSHEAR	5	1.1738e-05	-0.0425673	0.0171489	0.111442	9494.16
1411	3HP_0AM	0.03	0.255722	3HP	31.61	0.026754	0	POSTSHEAR	50	1.31168e-05	-0.695843	0.011146	-0.427625	-32601.5
1412	3HP_0AM	0.03	0.255722	3HP	31.61	0.026754	0	PRESHEAR	51	2500.23	157.26	0.341905	159.536	0.0638087
1413	3HP_0AM	0.03	0.255722	3HP	31.61	0.026754	0	SHEAR	52	75.0066	16.5077	0.033728	16.6158	0.221524
1414	3HP_0AM	0.03	0.255722	3HP	31.61	0.026754	0	POSTSHEAR	53	1.27043e-05	-0.79088	0.0168213	-0.558031	-43924.6
1415	3HP_0AM	0.03	0.255722	3HP	31.61	0.026754	0	PRESHEAR	54	2500.23	157.137	0.351325	159.279	0.063706
1416	3HP_0AM	0.03	0.255722	3HP	31.61	0.026754	0	SHEAR	55	50.0054	13.594	0.027621	13.6986	0.273942
1417	3HP_0AM	0.03	0.255722	3HP	31.61	0.026754	0	POSTSHEAR	56	-6.98189e-05	-0.765082	0.0181237	-0.555938	7962.57
1418	3HP_0AM	0.03	0.255722	3HP	31.61	0.026754	0	PRESHEAR	57	2500.23	156.971	0.321713	158.975	0.063584
1419	3HP_0AM	0.03	0.255722	3HP	31.61	0.026754	0	SHEAR	58	25.0029	10.1737	0.0486176	10.2693	0.410723
1420	3HP_0AM	0.03	0.255722	3HP	31.61	0.026754	0	POSTSHEAR	59	-3.02074e-06	-0.596176	0.0100477	-0.242661	80331.7
1421	3HP_0AM	0.03	0.255722	3HP	31.61	0.026754	0	PRESHEAR	6	2500.23	161.553	0.345783	163.606	0.0654363
1422	3HP_0AM	0.03	0.255722	3HP	31.61	0.026754	0	PRESHEAR	60	2500.23	156.74	0.282178	158.729	0.0634858
1423	3HP_0AM	0.03	0.255722	3HP	31.61	0.026754	0	SHEAR	61	10.0012	7.33391	0.0120961	7.48618	0.748529
1424	3HP_0AM	0.03	0.255722	3HP	31.61	0.026754	0	POSTSHEAR	62	-1.98209e-05	-0.406925	0.0163933	0.098343	-4961.58
1425	3HP_0AM	0.03	0.255722	3HP	31.61	0.026754	0	SHEAR	7	2000.19	136.008	0.177525	136.318	0.0681525
1426	3HP_0AM	0.03	0.255722	3HP	31.61	0.026754	0	POSTSHEAR	8	-2.11517e-05	-0.15667	0.0148642	0.0372069	-1759.05
1427	3HP_0AM	0.03	0.255722	3HP	31.61	0.026754	0	PRESHEAR	9	2500.23	161.012	0.350721	163.063	0.0652194
1428	3HP_10AM	0.03	0.255722	3HP	31.15	0.026177	10	PRESHEAR	0	2500.31	151.644	0.663546	154.875	0.0619423
1429	3HP_10AM	0.03	0.255722	3HP	31.15	0.026177	10	SHEAR	1	2500.3	151.04	0.710031	152.483	0.060986
1430	3HP_10AM	0.03	0.255722	3HP	31.15	0.026177	10	SHEAR	10	1750.21	112.598	0.243277	112.968	0.0645453
1431	3HP_10AM	0.03	0.255722	3HP	31.15	0.026177	10	POSTSHEAR	11	-1.20254e-05	-0.0360331	0.0164918	0.00992221	-825.104
1432	3HP_10AM	0.03	0.255722	3HP	31.15	0.026177	10	PRESHEAR	12	2500.29	150.275	0.600951	153.505	0.0613948
1433	3HP_10AM	0.03	0.255722	3HP	31.15	0.026177	10	SHEAR	13	1500.18	99.2274	0.0762488	99.3465	0.066223
1434	3HP_10AM	0.03	0.255722	3HP	31.15	0.026177	10	POSTSHEAR	14	1.17179e-05	-0.060387	0.0193378	-0.00148097	-126.385
1435	3HP_10AM	0.03	0.255722	3HP	31.15	0.026177	10	PRESHEAR	15	2500.3	150.094	0.705576	153.477	0.0613833
1436	3HP_10AM	0.03	0.255722	3HP	31.15	0.026177	10	SHEAR	16	1250.16	85.5371	0.0799465	85.6411	0.0685039
1437	3HP_10AM	0.03	0.255722	3HP	31.15	0.026177	10	POSTSHEAR	17	6.41428e-06	-0.0587095	0.0184528	0.0190229	2965.71
1438	3HP_10AM	0.03	0.255722	3HP	31.15	0.026177	10	PRESHEAR	18	2500.3	149.858	0.628492	153.246	0.0612912
1439	3HP_10AM	0.03	0.255722	3HP	31.15	0.026177	10	SHEAR	19	1000.12	71.5225	0.170716	71.7492	0.0717405
1440	3HP_10AM	0.03	0.255722	3HP	31.15	0.026177	10	POSTSHEAR	2	-6.45104e-06	-0.0710954	0.0110527	-0.00313405	485.822
1441	3HP_10AM	0.03	0.255722	3HP	31.15	0.026177	10	POSTSHEAR	20	1.39557e-05	-0.0317344	0.0116615	0.0156165	1119
1442	3HP_10AM	0.03	0.255722	3HP	31.15	0.026177	10	PRESHEAR	21	2500.29	149.573	0.634686	152.85	0.061133
1443	3HP_10AM	0.03	0.255722	3HP	31.15	0.026177	10	SHEAR	22	750.086	57.0449	0.203897	57.322	0.0764206
1444	3HP_10AM	0.03	0.255722	3HP	31.15	0.026177	10	POSTSHEAR	23	-1.96615e-05	-0.0398605	0.0121655	0.012645	-643.136
1445	3HP_10AM	0.03	0.255722	3HP	31.15	0.026177	10	PRESHEAR	24	2500.32	149.244	0.705434	152.739	0.0610878
1446	3HP_10AM	0.03	0.255722	3HP	31.15	0.026177	10	SHEAR	25	500.055	41.9315	0.194153	42.1856	0.0843618
1447	3HP_10AM	0.03	0.255722	3HP	31.15	0.026177	10	POSTSHEAR	26	2.47083e-05	-0.00322226	0.0157716	0.046776	1893.13
1448	3HP_10AM	0.03	0.255722	3HP	31.15	0.026177	10	PRESHEAR	27	2500.31	149	0.681986	152.527	0.0610031
1449	3HP_10AM	0.03	0.255722	3HP	31.15	0.026177	10	SHEAR	28	250.034	25.5552	0.114229	25.7504	0.102988
1450	3HP_10AM	0.03	0.255722	3HP	31.15	0.026177	10	POSTSHEAR	29	2.06434e-05	0.015584	0.0186301	0.072374	3505.91
1451	3HP_10AM	0.03	0.255722	3HP	31.15	0.026177	10	PRESHEAR	3	2500.31	151.081	0.651773	153.939	0.0615681
1452	3HP_10AM	0.03	0.255722	3HP	31.15	0.026177	10	PRESHEAR	30	2500.3	148.598	0.679366	151.97	0.0607806
1453	3HP_10AM	0.03	0.255722	3HP	31.15	0.026177	10	SHEAR	31	100.009	14.2716	0.0631368	14.3958	0.143944
1454	3HP_10AM	0.03	0.255722	3HP	31.15	0.026177	10	POSTSHEAR	32	6.09764e-05	0.0713377	0.0104149	0.136615	2240.46
1455	3HP_10AM	0.03	0.255722	3HP	31.15	0.026177	10	PRESHEAR	33	2500.31	148.325	0.676753	151.642	0.0606492
1456	3HP_10AM	0.03	0.255722	3HP	31.15	0.026177	10	SHEAR	34	75.0048	12.0538	0.0551201	12.1835	0.162437
1457	3HP_10AM	0.03	0.255722	3HP	31.15	0.026177	10	POSTSHEAR	35	1.8554e-05	0.0931868	0.0101763	0.167316	9017.79
1458	3HP_10AM	0.03	0.255722	3HP	31.15	0.026177	10	PRESHEAR	36	2500.3	148.072	0.64625	151.254	0.0604942
1459	3HP_10AM	0.03	0.255722	3HP	31.15	0.026177	10	SHEAR	37	50.009	9.67722	0.0415737	9.83787	0.196722
1460	3HP_10AM	0.03	0.255722	3HP	31.15	0.026177	10	POSTSHEAR	38	6.89817e-06	0.0710651	0.0139377	0.174058	25232.5
1461	3HP_10AM	0.03	0.255722	3HP	31.15	0.026177	10	PRESHEAR	39	2500.3	147.759	0.667354	150.881	0.0603451
1462	3HP_10AM	0.03	0.255722	3HP	31.15	0.026177	10	SHEAR	4	2250.27	138.402	0.561934	139.322	0.0619133
1463	3HP_10AM	0.03	0.255722	3HP	31.15	0.026177	10	SHEAR	40	25.0076	6.99117	0.0280566	7.13299	0.285233
1464	3HP_10AM	0.03	0.255722	3HP	31.15	0.026177	10	POSTSHEAR	41	1.33045e-05	0.130097	0.0124144	0.283737	21326.4
1465	3HP_10AM	0.03	0.255722	3HP	31.15	0.026177	10	PRESHEAR	42	2500.3	147.586	0.731305	150.594	0.0602304
1466	3HP_10AM	0.03	0.255722	3HP	31.15	0.026177	10	SHEAR	43	9.99915	4.94371	0.0114651	5.09297	0.50934
1467	3HP_10AM	0.03	0.255722	3HP	31.15	0.026177	10	POSTSHEAR	44	-2.14566e-05	0.203333	0.00966897	0.417835	-19473.5
1468	3HP_10AM	0.03	0.255722	3HP	31.15	0.026177	10	PRESHEAR	45	2500.31	147.371	0.716793	150.437	0.0601673
1469	3HP_10AM	0.03	0.255722	3HP	31.15	0.026177	10	SHEAR	46	1.00114	2.74696	0.00962377	2.77048	2.76732
1470	3HP_10AM	0.03	0.255722	3HP	31.15	0.026177	10	POSTSHEAR	47	3.98063e-05	0.391338	0.0145011	0.742852	18661.7
1471	3HP_10AM	0.03	0.255722	3HP	31.15	0.026177	10	PRESHEAR	48	2500.3	147.074	0.651119	150.17	0.0600606
1472	3HP_10AM	0.03	0.255722	3HP	31.15	0.026177	10	POSTSHEAR	5	7.48741e-05	-0.0838699	0.0188019	-0.0332536	-444.127
1473	3HP_10AM	0.03	0.255722	3HP	31.15	0.026177	10	PRESHEAR	6	2500.3	150.709	0.666012	153.796	0.0615111
1474	3HP_10AM	0.03	0.255722	3HP	31.15	0.026177	10	SHEAR	7	2000.24	125.7	0.396034	126.263	0.0631238
1475	3HP_10AM	0.03	0.255722	3HP	31.15	0.026177	10	POSTSHEAR	8	2.78514e-05	-0.0622329	0.0220255	0.00350214	125.744
1476	3HP_10AM	0.03	0.255722	3HP	31.15	0.026177	10	PRESHEAR	9	2500.3	150.501	0.690874	153.763	0.0614979
1477	3HP_20AM	0.03	0.255722	3HP	31.26	0.026315	20	PRESHEAR	0	2500.29	146.549	0.501523	149.811	0.0599174
1478	3HP_20AM	0.03	0.255722	3HP	31.26	0.026315	20	SHEAR	1	2500.3	145.864	0.531752	147.222	0.0588816
1479	3HP_20AM	0.03	0.255722	3HP	31.26	0.026315	20	SHEAR	10	1750.2	107.217	0.179343	107.488	0.0614148
1480	3HP_20AM	0.03	0.255722	3HP	31.26	0.026315	20	POSTSHEAR	11	1.94603e-05	-0.0597969	0.0123422	-0.0110413	-567.373
1481	3HP_20AM	0.03	0.255722	3HP	31.26	0.026315	20	PRESHEAR	12	2500.3	143.973	0.508841	147.215	0.0588789
1482	3HP_20AM	0.03	0.255722	3HP	31.26	0.026315	20	SHEAR	13	1500.17	93.839	0.0614822	93.942	0.0626208
1483	3HP_20AM	0.03	0.255722	3HP	31.26	0.026315	20	POSTSHEAR	14	-3.35657e-05	-0.0597032	0.0110352	-0.0183583	546.937
1484	3HP_20AM	0.03	0.255722	3HP	31.26	0.026315	20	PRESHEAR	15	2500.3	143.44	0.561626	146.832	0.0587259
1485	3HP_20AM	0.03	0.255722	3HP	31.26	0.026315	20	SHEAR	16	1250.14	80.2858	0.0654923	80.3728	0.0642909
1486	3HP_20AM	0.03	0.255722	3HP	31.26	0.026315	20	POSTSHEAR	17	2.8437e-06	-0.110572	0.018038	-0.0466596	-16408.1
1487	3HP_20AM	0.03	0.255722	3HP	31.26	0.026315	20	PRESHEAR	18	2500.29	142.999	0.446554	146.402	0.0585541
1488	3HP_20AM	0.03	0.255722	3HP	31.26	0.026315	20	SHEAR	19	1000.13	66.4931	0.126349	66.711	0.0667025
1489	3HP_20AM	0.03	0.255722	3HP	31.26	0.026315	20	POSTSHEAR	2	-5.74675e-05	-0.0116458	0.0090346	0.0373549	-650.019
1490	3HP_20AM	0.03	0.255722	3HP	31.26	0.026315	20	POSTSHEAR	20	-1.13508e-05	-0.112348	0.00915009	-0.0348653	3071.61
1491	3HP_20AM	0.03	0.255722	3HP	31.26	0.026315	20	PRESHEAR	21	2500.31	142.61	0.516087	146.148	0.058452
1492	3HP_20AM	0.03	0.255722	3HP	31.26	0.026315	20	SHEAR	22	750.088	52.3764	0.162866	52.6177	0.0701486
1493	3HP_20AM	0.03	0.255722	3HP	31.26	0.026315	20	POSTSHEAR	23	-2.81385e-06	-0.131111	0.0106693	-0.0812244	28865.9
1494	3HP_20AM	0.03	0.255722	3HP	31.26	0.026315	20	PRESHEAR	24	2500.3	142.185	0.506591	145.686	0.0582671
1495	3HP_20AM	0.03	0.255722	3HP	31.26	0.026315	20	SHEAR	25	500.056	37.7799	0.139333	37.9935	0.0759785
1496	3HP_20AM	0.03	0.255722	3HP	31.26	0.026315	20	POSTSHEAR	26	-1.46793e-06	-0.114596	0.00956956	-0.0635729	43307.7
1497	3HP_20AM	0.03	0.255722	3HP	31.26	0.026315	20	PRESHEAR	27	2500.3	141.801	0.539825	145.3	0.0581132
1498	3HP_20AM	0.03	0.255722	3HP	31.26	0.026315	20	SHEAR	28	250.025	22.1704	0.0834163	22.296	0.089175
1499	3HP_20AM	0.03	0.255722	3HP	31.26	0.026315	20	POSTSHEAR	29	-4.10866e-06	-0.142553	0.00876413	-0.0834462	20309.8
1500	3HP_20AM	0.03	0.255722	3HP	31.26	0.026315	20	PRESHEAR	3	2500.3	145.682	0.524315	148.232	0.0592858
1501	3HP_20AM	0.03	0.255722	3HP	31.26	0.026315	20	PRESHEAR	30	2500.3	141.377	0.461521	144.545	0.0578111
1502	3HP_20AM	0.03	0.255722	3HP	31.26	0.026315	20	SHEAR	31	100.016	11.6074	0.0436171	11.7848	0.117829
1503	3HP_20AM	0.03	0.255722	3HP	31.26	0.026315	20	POSTSHEAR	32	-1.55966e-05	-0.141922	0.00939818	-0.0663033	4251.12
1504	3HP_20AM	0.03	0.255722	3HP	31.26	0.026315	20	PRESHEAR	33	2500.3	141.018	0.470833	143.71	0.0574769
1505	3HP_20AM	0.03	0.255722	3HP	31.26	0.026315	20	SHEAR	34	75.0079	9.55647	0.0351161	9.73431	0.129777
1506	3HP_20AM	0.03	0.255722	3HP	31.26	0.026315	20	POSTSHEAR	35	1.73348e-05	-0.135373	0.01748	-0.080952	-4669.91
1507	3HP_20AM	0.03	0.255722	3HP	31.26	0.026315	20	PRESHEAR	36	2500.3	140.698	0.510765	143.449	0.057373
1508	3HP_20AM	0.03	0.255722	3HP	31.26	0.026315	20	SHEAR	37	50.0017	7.39496	0.0304047	7.6016	0.152027
1509	3HP_20AM	0.03	0.255722	3HP	31.26	0.026315	20	POSTSHEAR	38	-3.17167e-05	-0.136546	0.0112377	-0.0542967	1711.93
1510	3HP_20AM	0.03	0.255722	3HP	31.26	0.026315	20	PRESHEAR	39	2500.3	140.383	0.531659	143.207	0.0572759
1511	3HP_20AM	0.03	0.255722	3HP	31.26	0.026315	20	SHEAR	4	2250.26	133.044	0.469194	133.762	0.059443
1512	3HP_20AM	0.03	0.255722	3HP	31.26	0.026315	20	SHEAR	40	24.9998	5.01569	0.0251758	5.17965	0.207188
1513	3HP_20AM	0.03	0.255722	3HP	31.26	0.026315	20	POSTSHEAR	41	1.43111e-05	-0.143871	0.0189963	-0.0642792	-4491.57
1514	3HP_20AM	0.03	0.255722	3HP	31.26	0.026315	20	PRESHEAR	42	2500.31	140.048	0.49174	142.872	0.0571418
1515	3HP_20AM	0.03	0.255722	3HP	31.26	0.026315	20	SHEAR	43	10.0021	3.25411	0.0226572	3.38257	0.338184
1516	3HP_20AM	0.03	0.255722	3HP	31.26	0.026315	20	POSTSHEAR	44	-1.6578e-05	-0.154242	0.012086	-0.0377317	2276.01
1517	3HP_20AM	0.03	0.255722	3HP	31.26	0.026315	20	PRESHEAR	45	2500.3	139.819	0.505715	142.58	0.0570253
1518	3HP_20AM	0.03	0.255722	3HP	31.26	0.026315	20	SHEAR	46	0.999879	1.40839	0.0125631	1.44677	1.44694
1519	3HP_20AM	0.03	0.255722	3HP	31.26	0.026315	20	POSTSHEAR	47	-3.5769e-05	-0.0849581	0.016913	0.139124	-3889.52
1520	3HP_20AM	0.03	0.255722	3HP	31.26	0.026315	20	PRESHEAR	48	2500.3	139.433	0.507457	142.186	0.0568674
1521	3HP_20AM	0.03	0.255722	3HP	31.26	0.026315	20	POSTSHEAR	5	-2.40204e-05	-0.0389371	0.0225083	0.039547	-1646.39
1522	3HP_20AM	0.03	0.255722	3HP	31.26	0.026315	20	PRESHEAR	6	2500.29	145.066	0.536407	147.756	0.0590956
1523	3HP_20AM	0.03	0.255722	3HP	31.26	0.026315	20	SHEAR	7	2000.24	120.262	0.33284	120.714	0.0603498
1524	3HP_20AM	0.03	0.255722	3HP	31.26	0.026315	20	POSTSHEAR	8	4.4203e-05	-0.0675214	0.0125545	-0.0128135	-289.879
1525	3HP_20AM	0.03	0.255722	3HP	31.26	0.026315	20	PRESHEAR	9	2500.3	144.563	0.521493	147.581	0.059025
1526	3HP_35AM	0.03	0.255722	3HP	31.11	0.026741	35	PRESHEAR	0	2500.33	168.576	0.419367	172.301	0.0689113
1527	3HP_35AM	0.03	0.255722	3HP	31.11	0.026741	35	SHEAR	1	2500.32	167.504	0.404073	169.02	0.0675993
1528	3HP_35AM	0.03	0.255722	3HP	31.11	0.026741	35	SHEAR	10	1750.23	120.481	0.14416	120.697	0.0689606
1529	3HP_35AM	0.03	0.255722	3HP	31.11	0.026741	35	POSTSHEAR	11	1.11932e-05	-0.0269087	0.0171173	0.0326008	2912.54
1530	3HP_35AM	0.03	0.255722	3HP	31.11	0.026741	35	PRESHEAR	12	2500.31	164.421	0.434447	168.236	0.0672863
1531	3HP_35AM	0.03	0.255722	3HP	31.11	0.026741	35	SHEAR	13	1500.17	104.682	0.0427762	104.761	0.0698329
1532	3HP_35AM	0.03	0.255722	3HP	31.11	0.026741	35	POSTSHEAR	14	-4.75158e-05	-0.0319001	0.0174069	0.0293813	-618.347
1533	3HP_35AM	0.03	0.255722	3HP	31.11	0.026741	35	PRESHEAR	15	2500.29	163.602	0.418756	167.517	0.066999
1534	3HP_35AM	0.03	0.255722	3HP	31.11	0.026741	35	SHEAR	16	1250.15	88.833	0.0414939	88.9191	0.071127
1535	3HP_35AM	0.03	0.255722	3HP	31.11	0.026741	35	POSTSHEAR	17	1.35051e-06	-0.026702	0.0114649	0.0317298	23494.8
1536	3HP_35AM	0.03	0.255722	3HP	31.11	0.026741	35	PRESHEAR	18	2500.3	162.921	0.441525	166.908	0.0667551
1537	3HP_35AM	0.03	0.255722	3HP	31.11	0.026741	35	SHEAR	19	1000.11	72.8552	0.0871716	73.0059	0.0729979
1538	3HP_35AM	0.03	0.255722	3HP	31.11	0.026741	35	POSTSHEAR	2	-2.17002e-05	-0.0197786	0.00732804	0.0674565	-3108.56
1539	3HP_35AM	0.03	0.255722	3HP	31.11	0.026741	35	POSTSHEAR	20	-4.87993e-05	-0.0347775	0.0146048	0.0261986	-536.864
1540	3HP_35AM	0.03	0.255722	3HP	31.11	0.026741	35	PRESHEAR	21	2500.3	162.179	0.419959	166.448	0.0665712
1541	3HP_35AM	0.03	0.255722	3HP	31.11	0.026741	35	SHEAR	22	750.081	56.6442	0.0984825	56.8099	0.0757383
1542	3HP_35AM	0.03	0.255722	3HP	31.11	0.026741	35	POSTSHEAR	23	-2.61281e-05	-0.0494405	0.0133385	0.00962436	-368.353
1543	3HP_35AM	0.03	0.255722	3HP	31.11	0.026741	35	PRESHEAR	24	2500.3	161.529	0.418916	165.746	0.0662903
1544	3HP_35AM	0.03	0.255722	3HP	31.11	0.026741	35	SHEAR	25	500.05	40.0843	0.0892249	40.2262	0.0804445
1545	3HP_35AM	0.03	0.255722	3HP	31.11	0.026741	35	POSTSHEAR	26	-2.88747e-05	-0.0523909	0.0131134	-0.000915983	31.7227
1546	3HP_35AM	0.03	0.255722	3HP	31.11	0.026741	35	PRESHEAR	27	2500.29	160.882	0.437345	165.136	0.0660468
1547	3HP_35AM	0.03	0.255722	3HP	31.11	0.026741	35	SHEAR	28	250.029	22.5691	0.0532383	22.6765	0.0906957
1548	3HP_35AM	0.03	0.255722	3HP	31.11	0.026741	35	POSTSHEAR	29	-1.22365e-05	-0.0631187	0.019598	0.00806876	-659.403
1549	3HP_35AM	0.03	0.255722	3HP	31.11	0.026741	35	PRESHEAR	3	2500.28	167.45	0.417962	171.471	0.0685808
1550	3HP_35AM	0.03	0.255722	3HP	31.11	0.026741	35	PRESHEAR	30	2500.31	160.311	0.401413	164.247	0.0656907
1551	3HP_35AM	0.03	0.255722	3HP	31.11	0.026741	35	SHEAR	31	100.013	10.9395	0.0279677	11.07	0.110685
1552	3HP_35AM	0.03	0.255722	3HP	31.11	0.026741	35	POSTSHEAR	32	1.19836e-05	-0.0672819	0.0147232	-0.0220465	-1839.73
1553	3HP_35AM	0.03	0.255722	3HP	31.11	0.026741	35	PRESHEAR	33	2500.3	159.757	0.41998	163.403	0.0653532
1554	3HP_35AM	0.03	0.255722	3HP	31.11	0.026741	35	SHEAR	34	75.0084	8.76934	0.0262388	8.91067	0.118796
1555	3HP_35AM	0.03	0.255722	3HP	31.11	0.026741	35	POSTSHEAR	35	2.60297e-05	-0.0829221	0.0119021	-0.0240506	-923.968
1556	3HP_35AM	0.03	0.255722	3HP	31.11	0.026741	35	PRESHEAR	36	2500.29	159.284	0.384655	163.014	0.065198
1557	3HP_35AM	0.03	0.255722	3HP	31.11	0.026741	35	SHEAR	37	50.0045	6.50683	0.0195457	6.63596	0.132707
1558	3HP_35AM	0.03	0.255722	3HP	31.11	0.026741	35	POSTSHEAR	38	-5.55401e-05	-0.0683102	0.0148852	-0.0360663	649.375
1559	3HP_35AM	0.03	0.255722	3HP	31.11	0.026741	35	PRESHEAR	39	2500.28	158.857	0.406866	162.721	0.0650813
1560	3HP_35AM	0.03	0.255722	3HP	31.11	0.026741	35	SHEAR	4	2250.28	151.897	0.344297	152.788	0.0678974
1561	3HP_35AM	0.03	0.255722	3HP	31.11	0.026741	35	SHEAR	40	25.005	4.0748	0.0377163	4.20435	0.16814
1562	3HP_35AM	0.03	0.255722	3HP	31.11	0.026741	35	POSTSHEAR	41	1.49938e-05	-0.102602	0.013717	-0.0221277	-1475.8
1563	3HP_35AM	0.03	0.255722	3HP	31.11	0.026741	35	PRESHEAR	42	2500.29	158.37	0.353679	162.037	0.0648074
1564	3HP_35AM	0.03	0.255722	3HP	31.11	0.026741	35	SHEAR	43	10.0004	2.37385	0.0206584	2.45253	0.245243
1565	3HP_35AM	0.03	0.255722	3HP	31.11	0.026741	35	POSTSHEAR	44	4.85369e-06	-0.124748	0.0153459	-0.0473216	-9749.63
1566	3HP_35AM	0.03	0.255722	3HP	31.11	0.026741	35	PRESHEAR	45	2500.29	157.904	0.374272	161.772	0.0647012
1567	3HP_35AM	0.03	0.255722	3HP	31.11	0.026741	35	SHEAR	46	1.00107	0.746712	0.0147538	0.777456	0.776625
1568	3HP_35AM	0.03	0.255722	3HP	31.11	0.026741	35	POSTSHEAR	47	-2.42436e-05	-0.0746695	0.0167512	-0.0181369	748.112
1569	3HP_35AM	0.03	0.255722	3HP	31.11	0.026741	35	PRESHEAR	48	2500.3	157.417	0.367188	161.429	0.0645641
1570	3HP_35AM	0.03	0.255722	3HP	31.11	0.026741	35	POSTSHEAR	5	4.43113e-05	0.00549446	0.012884	0.0373889	843.778
1571	3HP_35AM	0.03	0.255722	3HP	31.11	0.026741	35	PRESHEAR	6	2500.29	166.37	0.431934	169.996	0.0679903
1572	3HP_35AM	0.03	0.255722	3HP	31.11	0.026741	35	SHEAR	7	2000.24	136.233	0.248088	136.649	0.0683164
1573	3HP_35AM	0.03	0.255722	3HP	31.11	0.026741	35	POSTSHEAR	8	8.83968e-06	-0.0287952	0.0104389	0.0344554	3897.81
1574	3HP_35AM	0.03	0.255722	3HP	31.11	0.026741	35	PRESHEAR	9	2500.3	165.353	0.395741	169.322	0.0677206
1575	3LP_0AM	0.03	0.255722	3LP	31.3	0.014628	0	PRESHEAR	0	2500.56	118.955	0.161559	119.826	0.0479195
1576	3LP_0AM	0.03	0.255722	3LP	31.3	0.014628	0	SHEAR	1	2500.54	118.436	0.145772	119.086	0.0476243
1577	3LP_0AM	0.03	0.255722	3LP	31.3	0.014628	0	SHEAR	10	1850.42	95.1167	0.0682045	95.2417	0.0514703
1578	3LP_0AM	0.03	0.255722	3LP	31.3	0.014628	0	POSTSHEAR	11	4.89871e-05	0.654664	0.0151053	0.852594	17404.5
1579	3LP_0AM	0.03	0.255722	3LP	31.3	0.014628	0	PRESHEAR	12	2500.55	117.854	0.162784	118.806	0.0475118
1580	3LP_0AM	0.03	0.255722	3LP	31.3	0.014628	0	SHEAR	13	1750.39	91.4256	0.0609055	91.5271	0.0522896
1581	3LP_0AM	0.03	0.255722	3LP	31.3	0.014628	0	POSTSHEAR	14	3.12628e-05	0.647377	0.0178471	0.88426	28284.8
1582	3LP_0AM	0.03	0.255722	3LP	31.3	0.014628	0	PRESHEAR	15	2500.57	117.723	0.165515	118.687	0.047464
1583	3LP_0AM	0.03	0.255722	3LP	31.3	0.014628	0	SHEAR	16	1600.36	85.9008	0.0341616	85.9523	0.053708
1584	3LP_0AM	0.03	0.255722	3LP	31.3	0.014628	0	POSTSHEAR	17	1.37171e-05	0.735125	0.0116632	0.918527	66962.2
1585	3LP_0AM	0.03	0.255722	3LP	31.3	0.014628	0	PRESHEAR	18	2500.56	117.729	0.151427	118.648	0.0474485
1586	3LP_0AM	0.03	0.255722	3LP	31.3	0.014628	0	SHEAR	19	1500.33	82.1421	0.0164804	82.1718	0.0547693
1587	3LP_0AM	0.03	0.255722	3LP	31.3	0.014628	0	POSTSHEAR	2	-2.25466e-06	0.622005	0.0090502	0.730781	-324120
1588	3LP_0AM	0.03	0.255722	3LP	31.3	0.014628	0	POSTSHEAR	20	-9.89485e-06	0.777263	0.0174197	0.985968	-99644.5
1589	3LP_0AM	0.03	0.255722	3LP	31.3	0.014628	0	PRESHEAR	21	2500.55	117.601	0.126975	118.587	0.0474245
1590	3LP_0AM	0.03	0.255722	3LP	31.3	0.014628	0	SHEAR	22	1400.31	78.2582	0.0110296	78.2932	0.0559115
1591	3LP_0AM	0.03	0.255722	3LP	31.3	0.014628	0	POSTSHEAR	23	2.98357e-05	0.749383	0.00682519	0.886271	29705.1
1592	3LP_0AM	0.03	0.255722	3LP	31.3	0.014628	0	PRESHEAR	24	2500.56	117.545	0.139589	118.505	0.0473915
1593	3LP_0AM	0.03	0.255722	3LP	31.3	0.014628	0	SHEAR	25	1250.28	72.5545	0.0295332	72.6438	0.0581022
1594	3LP_0AM	0.03	0.255722	3LP	31.3	0.014628	0	POSTSHEAR	26	4.72072e-05	0.770824	0.00919461	0.981392	20789
1595	3LP_0AM	0.03	0.255722	3LP	31.3	0.014628	0	PRESHEAR	27	2500.55	117.426	0.151831	118.508	0.0473931
1596	3LP_0AM	0.03	0.255722	3LP	31.3	0.014628	0	SHEAR	28	1000.23	62.7449	0.0474534	62.8219	0.0628076
1597	3LP_0AM	0.03	0.255722	3LP	31.3	0.014628	0	POSTSHEAR	29	-7.86318e-06	0.839181	0.015324	1.01077	-128545
1598	3LP_0AM	0.03	0.255722	3LP	31.3	0.014628	0	PRESHEAR	3	2500.56	118.311	0.158401	119.225	0.0476791
1599	3LP_0AM	0.03	0.255722	3LP	31.3	0.014628	0	PRESHEAR	30	2500.55	117.44	0.138345	118.517	0.0473963
1600	3LP_0AM	0.03	0.255722	3LP	31.3	0.014628	0	SHEAR	31	750.169	52.4511	0.0710911	52.5827	0.0700944
1601	3LP_0AM	0.03	0.255722	3LP	31.3	0.014628	0	POSTSHEAR	32	3.03832e-05	0.975951	0.00833122	1.06899	35183.6
1602	3LP_0AM	0.03	0.255722	3LP	31.3	0.014628	0	PRESHEAR	33	2500.57	117.363	0.157833	118.498	0.0473885
1603	3LP_0AM	0.03	0.255722	3LP	31.3	0.014628	0	SHEAR	34	600.135	45.904	0.0782981	46.0476	0.0767287
1604	3LP_0AM	0.03	0.255722	3LP	31.3	0.014628	0	POSTSHEAR	35	-1.47221e-05	0.918758	0.0137327	1.07414	-72961
1605	3LP_0AM	0.03	0.255722	3LP	31.3	0.014628	0	PRESHEAR	36	2500.55	117.404	0.145475	118.447	0.0473683
1606	3LP_0AM	0.03	0.255722	3LP	31.3	0.014628	0	SHEAR	37	500.113	41.3651	0.0609206	41.4629	0.0829071
1607	3LP_0AM	0.03	0.255722	3LP	31.3	0.014628	0	POSTSHEAR	38	-3.97447e-06	1.06515	0.014715	1.1361	-285850
1608	3LP_0AM	0.03	0.255722	3LP	31.3	0.014628	0	PRESHEAR	39	2500.56	117.356	0.157995	118.477	0.0473801
1609	3LP_0AM	0.03	0.255722	3LP	31.3	0.014628	0	SHEAR	4	2250.51	109.521	0.123523	109.776	0.0487782
1610	3LP_0AM	0.03	0.255722	3LP	31.3	0.014628	0	SHEAR	40	400.088	36.6009	0.0594175	36.6882	0.0917004
1611	3LP_0AM	0.03	0.255722	3LP	31.3	0.014628	0	POSTSHEAR	41	-8.02192e-06	1.17344	0.0204063	1.26545	-157750
1612	3LP_0AM	0.03	0.255722	3LP	31.3	0.014628	0	PRESHEAR	42	2500.54	117.291	0.1468	118.41	0.0473537
1613	3LP_0AM	0.03	0.255722	3LP	31.3	0.014628	0	SHEAR	43	250.057	28.7917	0.0448713	28.8987	0.115569
1614	3LP_0AM	0.03	0.255722	3LP	31.3	0.014628	0	POSTSHEAR	44	8.99078e-06	1.2285	0.0146277	1.34078	149129
1615	3LP_0AM	0.03	0.255722	3LP	31.3	0.014628	0	PRESHEAR	45	2500.53	117.315	0.167957	118.378	0.0473413
1616	3LP_0AM	0.03	0.255722	3LP	31.3	0.014628	0	SHEAR	46	200.044	25.9494	0.0444557	26.0661	0.130302
1617	3LP_0AM	0.03	0.255722	3LP	31.3	0.014628	0	POSTSHEAR	47	-1.06225e-05	1.43118	0.00870733	1.51847	-142949
1618	3LP_0AM	0.03	0.255722	3LP	31.3	0.014628	0	PRESHEAR	48	2500.55	117.215	0.157908	118.35	0.0473294
1619	3LP_0AM	0.03	0.255722	3LP	31.3	0.014628	0	SHEAR	49	100.022	19.4525	0.033489	19.5934	0.19589
1620	3LP_0AM	0.03	0.255722	3LP	31.3	0.014628	0	POSTSHEAR	5	9.96226e-06	0.704878	0.0175137	0.804115	80716.1
1621	3LP_0AM	0.03	0.255722	3LP	31.3	0.014628	0	POSTSHEAR	50	-6.20301e-06	1.81477	0.0109854	1.93047	-311215
1622	3LP_0AM	0.03	0.255722	3LP	31.3	0.014628	0	PRESHEAR	51	2500.55	117.169	0.15615	118.126	0.0472398
1623	3LP_0AM	0.03	0.255722	3LP	31.3	0.014628	0	SHEAR	52	75.0159	17.5114	0.027617	17.7174	0.236181
1624	3LP_0AM	0.03	0.255722	3LP	31.3	0.014628	0	POSTSHEAR	53	-1.60948e-05	2.08931	0.0283786	2.2059	-137056
1625	3LP_0AM	0.03	0.255722	3LP	31.3	0.014628	0	PRESHEAR	54	2500.58	117.105	0.169927	118.028	0.0472002
1626	3LP_0AM	0.03	0.255722	3LP	31.3	0.014628	0	SHEAR	55	50.0108	15.3594	0.0237923	15.6002	0.311937
1627	3LP_0AM	0.03	0.255722	3LP	31.3	0.014628	0	POSTSHEAR	56	-7.29798e-07	2.22425	0.0245091	2.35316	-3.2244e+06
1628	3LP_0AM	0.03	0.255722	3LP	31.3	0.014628	0	PRESHEAR	57	2500.54	117.077	0.160367	118.006	0.0471922
1629	3LP_0AM	0.03	0.255722	3LP	31.3	0.014628	0	SHEAR	58	25.0062	12.7713	0.0261376	13.0647	0.52246
1630	3LP_0AM	0.03	0.255722	3LP	31.3	0.014628	0	POSTSHEAR	59	-1.09522e-05	2.52705	0.0158161	2.74801	-250910
1631	3LP_0AM	0.03	0.255722	3LP	31.3	0.014628	0	PRESHEAR	6	2500.56	118.158	0.139211	119.066	0.0476159
1632	3LP_0AM	0.03	0.255722	3LP	31.3	0.014628	0	PRESHEAR	60	2500.55	117.095	0.160318	117.955	0.0471718
1633	3LP_0AM	0.03	0.255722	3LP	31.3	0.014628	0	SHEAR	61	10.0023	10.369	0.0235405	10.7679	1.07654
1634	3LP_0AM	0.03	0.255722	3LP	31.3	0.014628	0	POSTSHEAR	62	1.57412e-05	2.8725	0.012304	3.12799	198713
1635	3LP_0AM	0.03	0.255722	3LP	31.3	0.014628	0	PRESHEAR	63	2500.56	117.012	0.160513	117.824	0.0471192
1636	3LP_0AM	0.03	0.255722	3LP	31.3	0.014628	0	SHEAR	7	2000.44	100.6	0.0855486	100.716	0.0503471
1637	3LP_0AM	0.03	0.255722	3LP	31.3	0.014628	0	POSTSHEAR	8	-2.34135e-05	0.636476	0.0201106	0.817582	-34919.3
1638	3LP_0AM	0.03	0.255722	3LP	31.3	0.014628	0	PRESHEAR	9	2500.54	117.947	0.154172	118.914	0.0475554
1639	3LP_10AM	0.03	0.255722	3LP	31.14	0.014539	10	PRESHEAR	0	2500.28	96.6579	0.222531	97.6692	0.0390633
1640	3LP_10AM	0.03	0.255722	3LP	31.14	0.014539	10	SHEAR	1	2500.29	96.3917	0.207153	96.963	0.0387807
1641	3LP_10AM	0.03	0.255722	3LP	31.14	0.014539	10	SHEAR	10	1750.21	72.5409	0.0653557	72.6629	0.0415168
1642	3LP_10AM	0.03	0.255722	3LP	31.14	0.014539	10	POSTSHEAR	11	7.1896e-06	-0.0684263	0.0132879	0.0143078	1990.07
1643	3LP_10AM	0.03	0.255722	3LP	31.14	0.014539	10	PRESHEAR	12	2500.3	95.761	0.200231	96.7632	0.0387006
1644	3LP_10AM	0.03	0.255722	3LP	31.14	0.014539	10	SHEAR	13	1500.17	64.2927	0.0237375	64.3602	0.0429018
1645	3LP_10AM	0.03	0.255722	3LP	31.14	0.014539	10	POSTSHEAR	14	1.87763e-06	-0.110827	0.0126193	0.0176997	9426.63
1646	3LP_10AM	0.03	0.255722	3LP	31.14	0.014539	10	PRESHEAR	15	2500.3	95.5514	0.22812	96.5911	0.0386319
1647	3LP_10AM	0.03	0.255722	3LP	31.14	0.014539	10	SHEAR	16	1250.14	55.8962	0.029834	55.9547	0.0447586
1648	3LP_10AM	0.03	0.255722	3LP	31.14	0.014539	10	POSTSHEAR	17	4.63231e-06	-0.0948976	0.0150739	-0.00899807	-1942.46
1649	3LP_10AM	0.03	0.255722	3LP	31.14	0.014539	10	PRESHEAR	18	2500.31	95.37	0.201348	96.4567	0.0385779
1650	3LP_10AM	0.03	0.255722	3LP	31.14	0.014539	10	SHEAR	19	1000.13	47.2451	0.0548684	47.335	0.0473288
1651	3LP_10AM	0.03	0.255722	3LP	31.14	0.014539	10	POSTSHEAR	2	-8.71364e-06	-0.0706527	0.0189693	0.100085	-11486
1652	3LP_10AM	0.03	0.255722	3LP	31.14	0.014539	10	POSTSHEAR	20	-2.29391e-05	-0.111746	0.0180083	-0.000449348	19.5887
1653	3LP_10AM	0.03	0.255722	3LP	31.14	0.014539	10	PRESHEAR	21	2500.3	95.2074	0.210773	96.3414	0.0385319
1654	3LP_10AM	0.03	0.255722	3LP	31.14	0.014539	10	SHEAR	22	750.107	38.2407	0.0641457	38.3436	0.0511175
1655	3LP_10AM	0.03	0.255722	3LP	31.14	0.014539	10	POSTSHEAR	23	4.79264e-06	-0.123303	0.0172764	0.00236434	493.328
1656	3LP_10AM	0.03	0.255722	3LP	31.14	0.014539	10	PRESHEAR	24	2500.29	95.0392	0.213635	96.1399	0.0384515
1657	3LP_10AM	0.03	0.255722	3LP	31.14	0.014539	10	SHEAR	25	500.059	28.7636	0.0625503	28.8659	0.0577251
1658	3LP_10AM	0.03	0.255722	3LP	31.14	0.014539	10	POSTSHEAR	26	-6.52717e-05	-0.128882	0.0145688	-0.0243114	372.464
1659	3LP_10AM	0.03	0.255722	3LP	31.14	0.014539	10	PRESHEAR	27	2500.31	94.8641	0.217156	95.9406	0.0383715
1660	3LP_10AM	0.03	0.255722	3LP	31.14	0.014539	10	SHEAR	28	250.024	18.3596	0.0404466	18.4777	0.0739037
1661	3LP_10AM	0.03	0.255722	3LP	31.14	0.014539	10	POSTSHEAR	29	-1.09212e-05	-0.0789441	0.019473	0.0443811	-4063.75
1662	3LP_10AM	0.03	0.255722	3LP	31.14	0.014539	10	PRESHEAR	3	2500.3	96.3652	0.205208	97.3465	0.0389339
1663	3LP_10AM	0.03	0.255722	3LP	31.14	0.014539	10	PRESHEAR	30	2500.3	94.6595	0.21442	95.746	0.0382938
1664	3LP_10AM	0.03	0.255722	3LP	31.14	0.014539	10	SHEAR	31	100.01	10.984	0.0184849	11.2406	0.112394
1665	3LP_10AM	0.03	0.255722	3LP	31.14	0.014539	10	POSTSHEAR	32	-4.20649e-05	0.00341243	0.0200471	0.131848	-3134.39
1666	3LP_10AM	0.03	0.255722	3LP	31.14	0.014539	10	PRESHEAR	33	2500.32	94.4488	0.205716	95.4844	0.0381889
1667	3LP_10AM	0.03	0.255722	3LP	31.14	0.014539	10	SHEAR	34	75.0088	9.49337	0.0275609	9.72307	0.129626
1668	3LP_10AM	0.03	0.255722	3LP	31.14	0.014539	10	POSTSHEAR	35	-6.02349e-06	0.0408562	0.0205422	0.180148	-29907.6
1669	3LP_10AM	0.03	0.255722	3LP	31.14	0.014539	10	PRESHEAR	36	2500.3	94.2841	0.2073	95.3048	0.0381174
1670	3LP_10AM	0.03	0.255722	3LP	31.14	0.014539	10	SHEAR	37	50.0061	7.8668	0.0186654	8.1335	0.16265
1671	3LP_10AM	0.03	0.255722	3LP	31.14	0.014539	10	POSTSHEAR	38	1.50831e-06	0.0704212	0.0140613	0.197177	130727
1672	3LP_10AM	0.03	0.255722	3LP	31.14	0.014539	10	PRESHEAR	39	2500.31	94.0696	0.194192	95.1193	0.0380431
1673	3LP_10AM	0.03	0.255722	3LP	31.14	0.014539	10	SHEAR	4	2250.28	88.6699	0.179417	88.9479	0.0395276
1674	3LP_10AM	0.03	0.255722	3LP	31.14	0.014539	10	SHEAR	40	25.0043	5.99397	0.028876	6.2094	0.248333
1675	3LP_10AM	0.03	0.255722	3LP	31.14	0.014539	10	POSTSHEAR	41	4.01593e-06	0.181308	0.0150939	0.335702	83592.6
1676	3LP_10AM	0.03	0.255722	3LP	31.14	0.014539	10	PRESHEAR	42	2500.29	93.8762	0.200865	94.8967	0.0379542
1677	3LP_10AM	0.03	0.255722	3LP	31.14	0.014539	10	SHEAR	43	10.0028	4.50258	0.0297194	4.70828	0.470695
1678	3LP_10AM	0.03	0.255722	3LP	31.14	0.014539	10	POSTSHEAR	44	1.83005e-05	0.365762	0.0136221	0.575947	31471.7
1679	3LP_10AM	0.03	0.255722	3LP	31.14	0.014539	10	PRESHEAR	45	2500.3	93.766	0.207252	94.7639	0.037901
1680	3LP_10AM	0.03	0.255722	3LP	31.14	0.014539	10	SHEAR	46	0.999323	2.06156	0.0151239	2.3854	2.38702
1681	3LP_10AM	0.03	0.255722	3LP	31.14	0.014539	10	POSTSHEAR	47	-5.55826e-06	0.37735	0.00866486	0.624805	-112410
1682	3LP_10AM	0.03	0.255722	3LP	31.14	0.014539	10	PRESHEAR	48	2500.3	93.6281	0.20801	94.6459	0.0378538
1683	3LP_10AM	0.03	0.255722	3LP	31.14	0.014539	10	POSTSHEAR	5	8.53285e-06	-0.055216	0.0157035	0.0711127	8334
1684	3LP_10AM	0.03	0.255722	3LP	31.14	0.014539	10	PRESHEAR	6	2500.29	96.1491	0.228354	97.1374	0.0388504
1685	3LP_10AM	0.03	0.255722	3LP	31.14	0.014539	10	SHEAR	7	2000.23	80.6525	0.123744	80.8497	0.0404201
1686	3LP_10AM	0.03	0.255722	3LP	31.14	0.014539	10	POSTSHEAR	8	-3.08226e-06	-0.0753855	0.0183956	0.0262446	-8514.73
1687	3LP_10AM	0.03	0.255722	3LP	31.14	0.014539	10	PRESHEAR	9	2500.29	95.947	0.217808	96.9531	0.0387767
1688	3LP_20AM	0.03	0.255722	3LP	31.1	0.014517	20	PRESHEAR	0	2500.3	105.02	0.355073	106.338	0.0425302
1689	3LP_20AM	0.03	0.255722	3LP	31.1	0.014517	20	SHEAR	1	2500.31	104.755	0.335528	105.469	0.0421826
1690	3LP_20AM	0.03	0.255722	3LP	31.1	0.014517	20	SHEAR	10	1750.22	78.9438	0.115731	79.1236	0.0452077
1691	3LP_20AM	0.03	0.255722	3LP	31.1	0.014517	20	POSTSHEAR	11	-3.53389e-06	0.0573778	0.0170661	0.131636	-37249.5
1692	3LP_20AM	0.03	0.255722	3LP	31.1	0.014517	20	PRESHEAR	12	2500.31	103.783	0.286054	105.23	0.042087
1693	3LP_20AM	0.03	0.255722	3LP	31.1	0.014517	20	SHEAR	13	1500.17	70.0922	0.0350249	70.148	0.04676
1694	3LP_20AM	0.03	0.255722	3LP	31.1	0.014517	20	POSTSHEAR	14	7.99518e-05	0.0382973	0.0155818	0.121365	1517.97
1695	3LP_20AM	0.03	0.255722	3LP	31.1	0.014517	20	PRESHEAR	15	2500.31	103.636	0.338507	105.109	0.0420385
1696	3LP_20AM	0.03	0.255722	3LP	31.1	0.014517	20	SHEAR	16	1250.15	61.0083	0.0424242	61.0878	0.0488643
1697	3LP_20AM	0.03	0.255722	3LP	31.1	0.014517	20	POSTSHEAR	17	2.98505e-06	0.0417477	0.0120895	0.111719	37426.2
1698	3LP_20AM	0.03	0.255722	3LP	31.1	0.014517	20	PRESHEAR	18	2500.29	103.386	0.332882	104.897	0.041954
1699	3LP_20AM	0.03	0.255722	3LP	31.1	0.014517	20	SHEAR	19	1000.12	51.5996	0.0868119	51.7429	0.0517366
1700	3LP_20AM	0.03	0.255722	3LP	31.1	0.014517	20	POSTSHEAR	2	-6.82871e-06	0.0596554	0.0174424	0.147034	-21531.8
1701	3LP_20AM	0.03	0.255722	3LP	31.1	0.014517	20	POSTSHEAR	20	-1.4292e-05	0.0574131	0.0193774	0.102125	-7145.63
1702	3LP_20AM	0.03	0.255722	3LP	31.1	0.014517	20	PRESHEAR	21	2500.29	103.174	0.319662	104.705	0.041877
1703	3LP_20AM	0.03	0.255722	3LP	31.1	0.014517	20	SHEAR	22	750.094	41.8709	0.108724	42.0433	0.0560506
1704	3LP_20AM	0.03	0.255722	3LP	31.1	0.014517	20	POSTSHEAR	23	2.38457e-05	0.0426358	0.0150152	0.129113	5414.53
1705	3LP_20AM	0.03	0.255722	3LP	31.1	0.014517	20	PRESHEAR	24	2500.31	102.95	0.321529	104.561	0.0418192
1706	3LP_20AM	0.03	0.255722	3LP	31.1	0.014517	20	SHEAR	25	500.055	31.5937	0.0969971	31.7388	0.0634706
1707	3LP_20AM	0.03	0.255722	3LP	31.1	0.014517	20	POSTSHEAR	26	5.35981e-05	0.0536933	0.0123561	0.145153	2708.17
1708	3LP_20AM	0.03	0.255722	3LP	31.1	0.014517	20	PRESHEAR	27	2500.3	102.738	0.351954	104.283	0.0417079
1709	3LP_20AM	0.03	0.255722	3LP	31.1	0.014517	20	SHEAR	28	250.03	20.3011	0.0634758	20.5505	0.0821922
1710	3LP_20AM	0.03	0.255722	3LP	31.1	0.014517	20	POSTSHEAR	29	2.14751e-05	0.0696712	0.0119384	0.152696	7110.37
1711	3LP_20AM	0.03	0.255722	3LP	31.1	0.014517	20	PRESHEAR	3	2500.3	104.781	0.351455	105.985	0.042389
1712	3LP_20AM	0.03	0.255722	3LP	31.1	0.014517	20	PRESHEAR	30	2500.31	102.484	0.313791	103.87	0.041543
1713	3LP_20AM	0.03	0.255722	3LP	31.1	0.014517	20	SHEAR	31	100.015	12.3276	0.0368118	12.6962	0.126944
1714	3LP_20AM	0.03	0.255722	3LP	31.1	0.014517	20	POSTSHEAR	32	3.30501e-06	0.129323	0.0129194	0.237272	71791.6
1715	3LP_20AM	0.03	0.255722	3LP	31.1	0.014517	20	PRESHEAR	33	2500.3	102.291	0.301546	103.506	0.0413976
1716	3LP_20AM	0.03	0.255722	3LP	31.1	0.014517	20	SHEAR	34	75.0127	10.7063	0.0343249	11.1232	0.148284
1717	3LP_20AM	0.03	0.255722	3LP	31.1	0.014517	20	POSTSHEAR	35	2.23449e-05	0.176085	0.0120456	0.36116	16163
1718	3LP_20AM	0.03	0.255722	3LP	31.1	0.014517	20	PRESHEAR	36	2500.31	102.02	0.329896	103.301	0.0413153
1719	3LP_20AM	0.03	0.255722	3LP	31.1	0.014517	20	SHEAR	37	50.0062	8.9247	0.0222968	9.32574	0.186492
1720	3LP_20AM	0.03	0.255722	3LP	31.1	0.014517	20	POSTSHEAR	38	-1.10213e-05	0.198011	0.0136586	0.287779	-26111.1
1721	3LP_20AM	0.03	0.255722	3LP	31.1	0.014517	20	PRESHEAR	39	2500.28	101.84	0.306358	103.032	0.041208
1722	3LP_20AM	0.03	0.255722	3LP	31.1	0.014517	20	SHEAR	4	2250.26	96.3744	0.285944	96.8666	0.0430469
1723	3LP_20AM	0.03	0.255722	3LP	31.1	0.014517	20	SHEAR	40	25.0024	6.86207	0.0199146	7.28895	0.29153
1724	3LP_20AM	0.03	0.255722	3LP	31.1	0.014517	20	POSTSHEAR	41	-3.06684e-05	0.20786	0.00875619	0.358204	-11679.9
1725	3LP_20AM	0.03	0.255722	3LP	31.1	0.014517	20	PRESHEAR	42	2500.3	101.662	0.319655	102.793	0.0411123
1726	3LP_20AM	0.03	0.255722	3LP	31.1	0.014517	20	SHEAR	43	10.001	5.20652	0.0114266	5.51101	0.551046
1727	3LP_20AM	0.03	0.255722	3LP	31.1	0.014517	20	POSTSHEAR	44	-2.85464e-05	0.296929	0.0204005	0.604116	-21162.6
1728	3LP_20AM	0.03	0.255722	3LP	31.1	0.014517	20	PRESHEAR	45	2500.3	101.401	0.325211	102.61	0.0410392
1729	3LP_20AM	0.03	0.255722	3LP	31.1	0.014517	20	SHEAR	46	0.999809	1.58385	0.0181343	3.02909	3.02967
1730	3LP_20AM	0.03	0.255722	3LP	31.1	0.014517	20	POSTSHEAR	47	1.06157e-05	0.326619	0.0148784	0.505947	47660.2
1731	3LP_20AM	0.03	0.255722	3LP	31.1	0.014517	20	PRESHEAR	48	2500.31	101.18	0.338033	102.434	0.0409687
1732	3LP_20AM	0.03	0.255722	3LP	31.1	0.014517	20	POSTSHEAR	5	5.20005e-06	0.0621839	0.014706	0.144232	27736.7
1733	3LP_20AM	0.03	0.255722	3LP	31.1	0.014517	20	PRESHEAR	6	2500.3	104.289	0.297012	105.611	0.0422393
1734	3LP_20AM	0.03	0.255722	3LP	31.1	0.014517	20	SHEAR	7	2000.24	87.6779	0.188961	87.9516	0.0439705
1735	3LP_20AM	0.03	0.255722	3LP	31.1	0.014517	20	POSTSHEAR	8	-4.26523e-05	0.0374262	0.0149639	0.164426	-3855.04
1736	3LP_20AM	0.03	0.255722	3LP	31.1	0.014517	20	PRESHEAR	9	2500.29	104.017	0.31878	105.405	0.042157
1737	3LP_35AM	0.03	0.255722	3LP	31.16	0.01455	35	PRESHEAR	0	2500.3	103.859	0.190948	104.769	0.0419025
1738	3LP_35AM	0.03	0.255722	3LP	31.16	0.01455	35	SHEAR	1	2500.29	103.535	0.190346	104.062	0.0416198
1739	3LP_35AM	0.03	0.255722	3LP	31.16	0.01455	35	SHEAR	10	1750.22	76.0159	0.0675297	76.1375	0.0435018
1740	3LP_35AM	0.03	0.255722	3LP	31.16	0.01455	35	POSTSHEAR	11	-4.09869e-05	0.0127441	0.0103114	0.0794079	-1937.4
1741	3LP_35AM	0.03	0.255722	3LP	31.16	0.01455	35	PRESHEAR	12	2500.32	101.961	0.186186	103.204	0.0412763
1742	3LP_35AM	0.03	0.255722	3LP	31.16	0.01455	35	SHEAR	13	1500.17	66.5997	0.0174393	66.6714	0.0444425
1743	3LP_35AM	0.03	0.255722	3LP	31.16	0.01455	35	POSTSHEAR	14	-3.12669e-05	0.0207784	0.0218929	0.0647186	-2069.88
1744	3LP_35AM	0.03	0.255722	3LP	31.16	0.01455	35	PRESHEAR	15	2500.29	101.518	0.190931	102.522	0.041004
1745	3LP_35AM	0.03	0.255722	3LP	31.16	0.01455	35	SHEAR	16	1250.15	57.0436	0.0238043	57.1608	0.0457233
1746	3LP_35AM	0.03	0.255722	3LP	31.16	0.01455	35	POSTSHEAR	17	4.54946e-05	0.0367936	0.0123152	0.0865067	1901.47
1747	3LP_35AM	0.03	0.255722	3LP	31.16	0.01455	35	PRESHEAR	18	2500.3	101.185	0.178215	102.168	0.0408624
1748	3LP_35AM	0.03	0.255722	3LP	31.16	0.01455	35	SHEAR	19	1000.11	47.4064	0.0434025	47.5199	0.0475146
1749	3LP_35AM	0.03	0.255722	3LP	31.16	0.01455	35	POSTSHEAR	2	-2.81945e-05	-0.000140875	0.0107202	0.0606314	-2150.47
1750	3LP_35AM	0.03	0.255722	3LP	31.16	0.01455	35	POSTSHEAR	20	1.34252e-05	0.0361813	0.0120994	0.0912027	6793.38
1751	3LP_35AM	0.03	0.255722	3LP	31.16	0.01455	35	PRESHEAR	21	2500.31	100.787	0.1866	101.835	0.0407289
1752	3LP_35AM	0.03	0.255722	3LP	31.16	0.01455	35	SHEAR	22	750.091	37.5285	0.0519999	37.6566	0.0502027
1753	3LP_35AM	0.03	0.255722	3LP	31.16	0.01455	35	POSTSHEAR	23	3.06836e-05	0.0534367	0.0125491	0.102498	3340.49
1754	3LP_35AM	0.03	0.255722	3LP	31.16	0.01455	35	PRESHEAR	24	2500.3	100.422	0.183917	101.551	0.0406154
1755	3LP_35AM	0.03	0.255722	3LP	31.16	0.01455	35	SHEAR	25	500.062	27.353	0.0498981	27.443	0.0548793
1756	3LP_35AM	0.03	0.255722	3LP	31.16	0.01455	35	POSTSHEAR	26	4.84711e-05	0.0418389	0.016343	0.10498	2165.83
1757	3LP_35AM	0.03	0.255722	3LP	31.16	0.01455	35	PRESHEAR	27	2500.32	100.137	0.187551	101.277	0.0405055
1758	3LP_35AM	0.03	0.255722	3LP	31.16	0.01455	35	SHEAR	28	250.024	16.4141	0.0370285	16.5579	0.0662253
1759	3LP_35AM	0.03	0.255722	3LP	31.16	0.01455	35	POSTSHEAR	29	7.87969e-06	0.0703303	0.0114241	0.122527	15549.7
1760	3LP_35AM	0.03	0.255722	3LP	31.16	0.01455	35	PRESHEAR	3	2500.29	103.346	0.195645	104.602	0.0418358
1761	3LP_35AM	0.03	0.255722	3LP	31.16	0.01455	35	PRESHEAR	30	2500.29	99.8002	0.180307	101.115	0.0404412
1762	3LP_35AM	0.03	0.255722	3LP	31.16	0.01455	35	SHEAR	31	100.011	8.87437	0.0296572	9.22003	0.0921903
1763	3LP_35AM	0.03	0.255722	3LP	31.16	0.01455	35	POSTSHEAR	32	-1.96402e-05	0.090695	0.0113391	0.126708	-6451.49
1764	3LP_35AM	0.03	0.255722	3LP	31.16	0.01455	35	PRESHEAR	33	2500.29	99.513	0.186816	100.582	0.040228
1765	3LP_35AM	0.03	0.255722	3LP	31.16	0.01455	35	SHEAR	34	75.0087	7.43207	0.0173648	7.76848	0.103568
1766	3LP_35AM	0.03	0.255722	3LP	31.16	0.01455	35	POSTSHEAR	35	1.37201e-05	0.0683928	0.0172626	0.150064	10937.6
1767	3LP_35AM	0.03	0.255722	3LP	31.16	0.01455	35	PRESHEAR	36	2500.29	99.2337	0.184461	100.225	0.0400851
1768	3LP_35AM	0.03	0.255722	3LP	31.16	0.01455	35	SHEAR	37	50.0065	5.90115	0.0131208	6.16833	0.123351
1769	3LP_35AM	0.03	0.255722	3LP	31.16	0.01455	35	POSTSHEAR	38	-8.39081e-06	0.113559	0.00996574	0.169447	-20194.4
1770	3LP_35AM	0.03	0.255722	3LP	31.16	0.01455	35	PRESHEAR	39	2500.28	98.9525	0.181382	99.9887	0.039991
1771	3LP_35AM	0.03	0.255722	3LP	31.16	0.01455	35	SHEAR	4	2250.28	94.4665	0.148943	94.8182	0.0421362
1772	3LP_35AM	0.03	0.255722	3LP	31.16	0.01455	35	SHEAR	40	25.0029	4.19896	0.0132026	4.44658	0.177842
1773	3LP_35AM	0.03	0.255722	3LP	31.16	0.01455	35	POSTSHEAR	41	2.55381e-05	0.134755	0.0116836	0.200317	7843.86
1774	3LP_35AM	0.03	0.255722	3LP	31.16	0.01455	35	PRESHEAR	42	2500.3	98.6958	0.176396	99.74	0.0398912
1775	3LP_35AM	0.03	0.255722	3LP	31.16	0.01455	35	SHEAR	43	10.0026	2.86238	0.00758015	3.03408	0.303329
1776	3LP_35AM	0.03	0.255722	3LP	31.16	0.01455	35	POSTSHEAR	44	-1.83975e-05	0.139249	0.0219298	0.241149	-13107.7
1777	3LP_35AM	0.03	0.255722	3LP	31.16	0.01455	35	PRESHEAR	45	2500.31	98.4254	0.182378	99.7116	0.0398797
1778	3LP_35AM	0.03	0.255722	3LP	31.16	0.01455	35	SHEAR	46	1.00006	1.3586	0.0118149	1.3852	1.38512
1779	3LP_35AM	0.03	0.255722	3LP	31.16	0.01455	35	POSTSHEAR	47	-3.21745e-06	0.274633	0.0154383	0.411668	-127948
1780	3LP_35AM	0.03	0.255722	3LP	31.16	0.01455	35	PRESHEAR	48	2500.27	98.0922	0.192641	99.5434	0.0398131
1781	3LP_35AM	0.03	0.255722	3LP	31.16	0.01455	35	POSTSHEAR	5	1.05503e-05	-0.00914712	0.0151051	0.05584	5292.75
1782	3LP_35AM	0.03	0.255722	3LP	31.16	0.01455	35	PRESHEAR	6	2500.31	102.861	0.194957	104.066	0.0416214
1783	3LP_35AM	0.03	0.255722	3LP	31.16	0.01455	35	SHEAR	7	2000.24	85.2996	0.111148	85.5092	0.0427494
1784	3LP_35AM	0.03	0.255722	3LP	31.16	0.01455	35	POSTSHEAR	8	3.55093e-05	0.0225599	0.0123207	0.0570695	1607.17
1785	3LP_35AM	0.03	0.255722	3LP	31.16	0.01455	35	PRESHEAR	9	2500.32	102.412	0.194142	103.617	0.0414416
